# Supplementary material for: Transition-metal-free oxidative annulation reactions between N-acyl-2-aminoacetophenones and alkynes for the facile synthesis of 2-amino-1-naphthols
Source: Royal Society of Chemistry journal article supplement (doi:10.1039/d2qo01723g), 2022-12-10
Supplement: d2qo01723g1.pdf [file d2qo01723g1.pdf]

## ***Supporting Information***

### **Transition-metal-free oxidative annulation reactions between *N*-acyl-2-aminoacetophenones and alkynes for facile synthesis of 2-amino-1-naphthols**

Jing Ren, Kaiyun Liu, Xiangxiang Kong, and Kaizhi Li\*

Biopharmaceutical Research Institute, West China Hospital, Sichuan University, 37  
Guoxue Alley, Chengdu 610041, China.

Email: [kzli@scu.edu.cn](mailto:kzli@scu.edu.cn)

#### **Table of contents**

|                                                                                                                                                  |     |
|--------------------------------------------------------------------------------------------------------------------------------------------------|-----|
| I. General remarks.....                                                                                                                          | 2   |
| II. Optimization of the cascade oxidative annulation of <i>N</i> -(2-oxo-2-phenylethyl)pivalamide <b>1a</b> with phenylacetylene <b>2a</b> ..... | 2   |
| III. General procedure for the synthesis of 2-amino-1-naphthols .....                                                                            | 4   |
| IV. General procedure for synthetic manipulation .....                                                                                           | 4   |
| V. Investigation of the reaction mechanism.....                                                                                                  | 5   |
| VI. Substrate scope (The products shown below were not obtained).....                                                                            | 10  |
| VII. Experimental data for the described substances .....                                                                                        | 10  |
| VIII. Copies of <sup>1</sup> H, <sup>13</sup> C NMR and <sup>19</sup> F spectra .....                                                            | 36  |
| IX. References .....                                                                                                                             | 105 |

## I. General remarks

NMR spectra were obtained on a Bruker AV II-400 MHz or a Varian Inova 400 MHz spectrometer. The <sup>1</sup>H NMR (400 MHz) chemical shifts were measured relative to CDCl<sub>3</sub>, DMSO-*d*<sub>6</sub>, Acetone-*d*<sub>6</sub>, CD<sub>3</sub>OD or TMS as the internal reference (CDCl<sub>3</sub>: δ = 7.26 ppm, DMSO-*d*<sub>6</sub>: δ = 2.50 ppm, Acetone-*d*<sub>6</sub>: δ = 2.05 ppm, CD<sub>3</sub>OD: δ = 3.31 ppm, TMS: δ = 0.00 ppm). The <sup>13</sup>C NMR (100 MHz) chemical shifts were given using CDCl<sub>3</sub>, DMSO-*d*<sub>6</sub>, CD<sub>3</sub>OD or Acetone-*d*<sub>6</sub> as the internal standard (CDCl<sub>3</sub>: δ = 77.16 ppm, DMSO-*d*<sub>6</sub>: δ = 39.52 ppm, CD<sub>3</sub>OD: δ = 49.00 ppm or Acetone-*d*<sub>6</sub>: δ = 29.84, 206.26 ppm). Chemical shifts δ are reported in ppm relative to residual solvent. Data are reported as follows: chemical shift, multiplicity (s = singlet, d = doublet, t = triplet, q = quartet, bs = broad singlet, m = multiplet), coupling constants (Hz), integration. High-resolution mass spectra (HRMS) were obtained with a Waters-Q-TOF-Premier (ESI).

Unless otherwise noted, all reagents and solvents were obtained from commercially available sources and used without further purification. Reactions were monitored by Thin Layer Chromatography (TLC) using UV light (254/365 nm) for detection. Products were purified by column chromatography, which was carried out on 200-300 mesh of silica gel purchased from Qing Dao Hai Yang Chemical Industry Co. The α-amino ketone substrates were prepared according to the known procedures.<sup>1-5</sup>

## II. Optimization of the cascade oxidative annulation of *N*-(2-oxo-2-phenylethyl)pivalamide **1a** with phenylacetylene **2a**

An oven-dried Schlenk tube with a magnetic stir bar was charged with *N*-(2-oxo-2-phenylethyl)pivalamide **1a** (43.9 mg, 0.20 mmol, 1.0 equiv.), phenylacetylene **2a** (44.0 μl, 0.40 mmol, 2.0 equiv.), oxidant, additive and solvent under N<sub>2</sub> atmosphere. The tube was sealed with a teflon-coated cap and the reaction solution was heated at indicated temperature for indicated time. After being cooled to ambient temperature, the solvent was removed under reduced pressure, and the residue was purified by column chromatography on silica gel (ethyl acetate/petroleum ether = 1/15, v/v) to provide the desired product **3a**.

**Table S1:** Optimization of the cascade oxidative annulation of *N*-(2-oxo-2-phenylethyl)pivalamide **1a** with phenylacetylene **2a**<sup>a</sup>

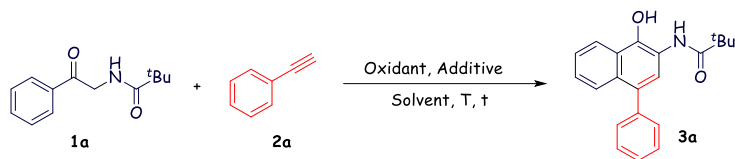

| Entry           | Oxidant (equiv.)  | Additive (equiv.)                                         | Solvent            | T (°C)     | Yield (%) <sup>b</sup> |
|-----------------|-------------------|-----------------------------------------------------------|--------------------|------------|------------------------|
| 1               | DTBP (2.0)        | Cu(acac) <sub>2</sub> (0.1)                               | Benzene            | 140        | 26                     |
| 2               | DTBP (2.0)        | Fe(acac) <sub>2</sub> (0.1)                               | Benzene            | 140        | 15                     |
| 3               | DTBP (2.0)        | Ni(acac) <sub>2</sub> (0.1)                               | Benzene            | 140        | 17                     |
| 4               | DTBP (2.0)        | Co(acac) <sub>2</sub> (0.1)                               | Benzene            | 140        | 27                     |
| 5               | DTBP (2.0)        | Mn(acac) <sub>2</sub> (0.1)                               | Benzene            | 140        | 26                     |
| 6               | DTBP (2.0)        | FeCl <sub>2</sub> ·4H <sub>2</sub> O (0.1)                | Benzene            | 140        | trace                  |
| 7               | DTBP (2.0)        | Fe(OTf) <sub>3</sub> (0.1)                                | Benzene            | 140        | trace                  |
| 8               | DTBP (2.0)        | Cu(OTf) <sub>2</sub> (0.1)                                | Benzene            | 140        | trace                  |
| 9               | DTBP (2.0)        | CuCl (0.1)                                                | Benzene            | 140        | 18                     |
| 10              | DTBP (2.0)        | Cu(CH <sub>3</sub> CN) <sub>4</sub> BF <sub>4</sub> (0.1) | Benzene            | 140        | 20                     |
| 11              | DTBP (2.0)        | --                                                        | Benzene            | 140        | 33                     |
| 12              | DTBP (2.0)        | --                                                        | DCE                | 140        | trace                  |
| 13              | DTBP (2.0)        | --                                                        | PhCF <sub>3</sub>  | 140        | 28                     |
| 14              | DTBP (2.0)        | --                                                        | CH <sub>3</sub> CN | 140        | 22                     |
| 15              | TBHP (2.0)        | --                                                        | Benzene            | 140        | 28                     |
| 16              | DCP (2.0)         | --                                                        | Benzene            | 140        | 26                     |
| 17              | DTBP (2.0)        | LiCl (2.0)                                                | Benzene            | 140        | 48                     |
| <b>18</b>       | <b>DTBP (2.0)</b> | <b>LiCl (2.0)</b>                                         | <b>Benzene</b>     | <b>120</b> | <b>61</b>              |
| 19              | DTBP (2.0)        | LiCl (2.0)                                                | Benzene            | 110        | 56                     |
| 20              | DTBP (3.0)        | LiCl (2.0)                                                | Benzene            | 120        | 41                     |
| 21              | DTBP (1.5)        | LiCl (2.0)                                                | Benzene            | 120        | 52                     |
| 22 <sup>c</sup> | DTBP (2.0)        | LiCl (2.0)                                                | Benzene            | 120        | 45                     |
| 23 <sup>d</sup> | DTBP (2.0)        | LiCl (2.0)                                                | Benzene            | 120        | 59                     |
| 24 <sup>e</sup> | DTBP (2.0)        | LiCl (2.0)                                                | Benzene            | 120        | 44                     |
| 25              | DTBP (2.0)        | KCl (2.0)                                                 | Benzene            | 120        | 43                     |
| 26              | DTBP (2.0)        | LiBr (2.0)                                                | Benzene            | 120        | 32                     |
| 27              | DTBP (2.0)        | MgCl <sub>2</sub> (2.0)                                   | Benzene            | 120        | trace                  |

<sup>a</sup>Reaction conditions: **1a** (43.9 mg, 0.2 mmol, 1.0 equiv.), **2a** (44.0  $\mu$ l, 0.4 mmol, 2.0 equiv.), oxidant and additive in benzene (2.0 mL) for 16 h. <sup>b</sup>Yield of isolated **3a** after purification by column chromatography. <sup>c</sup>**2a** (1.5 equiv.) was used. <sup>d</sup>24 h. <sup>e</sup>10 h. DTBP = Di-*tert*-butyl peroxide. DCE = 1,2-Dichloroethane. TBHP = *tert*-Butyl hydroperoxide. DCP = Dicumyl peroxide.

### III. General procedure for the synthesis of 2-amino-1-naphthols

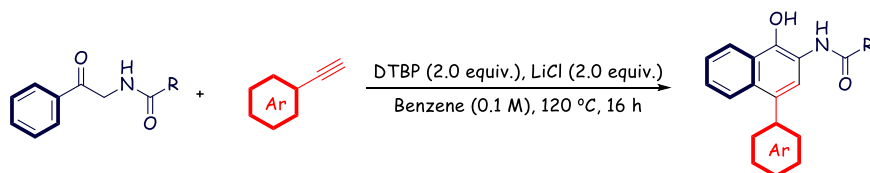

In a 25 mL Schlenk tube equipped with a stir bar was charged with  $\alpha$ -amino ketone substrates (0.2 mmol, 1.0 equiv.), alkynes (0.4 mmol, 2.0 equiv.), DTBP (73.6  $\mu$ l, 0.4 mmol, 2.0 equiv.) and LiCl (17.0 mg, 0.4 mmol, 2.0 equiv.) in benzene (2.0 mL). The reaction was stirred at 120 °C for 16 h under N<sub>2</sub> atmosphere. After cooled to room temperature, the solvent was removed under reduced pressure, and the residue was purified by silica gel column chromatography using petroleum ether and ethyl acetate as eluents to obtain the desired products.

### IV. General procedure for synthetic manipulation

#### a) Procedure for the synthetic of the fused benzoxazole derivatives

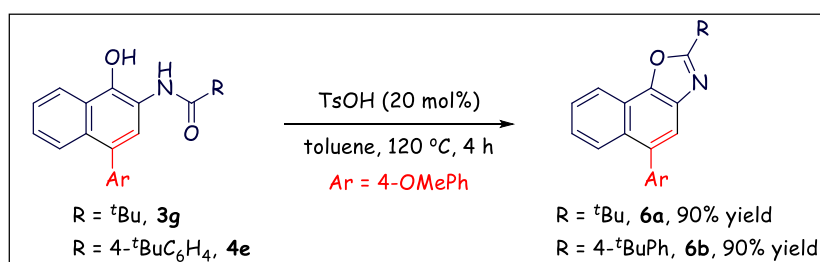

In a 10 mL Schlenk tube equipped with a stir bar was charged with **3g** (34.9 mg, 0.1 mmol, 1.0 equiv.) or **4e** (42.5 mg, 0.1 mmol, 1.0 equiv.), TsOH (3.5 mg, 0.02 mmol, 0.2 equiv.) in toluene (1.0 mL). The reaction was stirred at 120 °C for 4 h under N<sub>2</sub> atmosphere. After cooled to room temperature, the solvent was removed under reduced pressure, and the residue was purified by silica gel column chromatography using petroleum ether and ethyl acetate as eluents to obtain the desired product **6a** (29.8 mg, 90% yield) or **6b** (36.6 mg, 90% yield).

## b) Procedure for the synthetic of naphthalene-1,2-dione

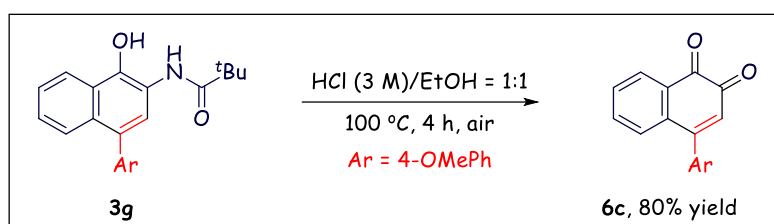

In a 10 mL Schlenk tube equipped with a stir bar was charged with *N*-(1-hydroxy-4-(4-methoxyphenyl)naphthalen-2-yl)pivalamide **3g** (34.9 mg, 0.1 mmol, 1.0 equiv.) in EtOH (1.0 mL) and HCl (3 M, 1.0 mL). The reaction was heated to 100 °C for 5 h under air atmosphere. After cooled to room temperature, the ethanol was removed under reduced pressure, and the residue was added saturated sodium bicarbonate solution and extracted with DCM (three times). Then concentrated and dried to obtain the desired product **6c** (21.1 mg, 80% yield).

## V. Investigation of the reaction mechanism

### a) Intermolecular competition experiments

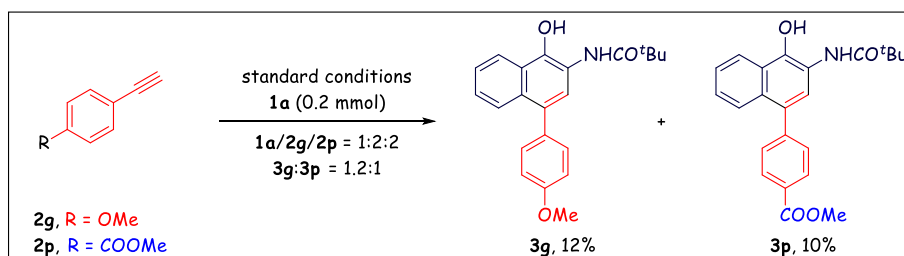

In a 25 mL Schlenk tube equipped with a stir bar was charged with *N*-(2-oxo-2-phenylethyl)pivalamide **1a** (21.9 mg, 0.1 mmol, 1.0 equiv), 1-ethynyl-4-methoxybenzene (26.5 mg, 0.2 mmol, 2.0 equiv), methyl 4-ethynylbenzoate (32.0 mg, 0.2 mmol, 2.0 equiv), DTBP (36.8  $\mu$ L, 0.2 mmol, 2.0 equiv) and LiCl (8.5 mg, 0.2 mmol, 2.0 equiv) in benzene (2.0 mL). The reaction was stirred at 120 °C for 16 h under N<sub>2</sub> atmosphere. After cooled to room temperature, the solvent was removed under reduced pressure, and the residue was purified by silica gel column chromatography using petroleum ether and ethyl acetate as eluents to obtain the desired products **3g** (4.1 mg, 12% yield) and **3p** (3.9 mg, 10% yield).

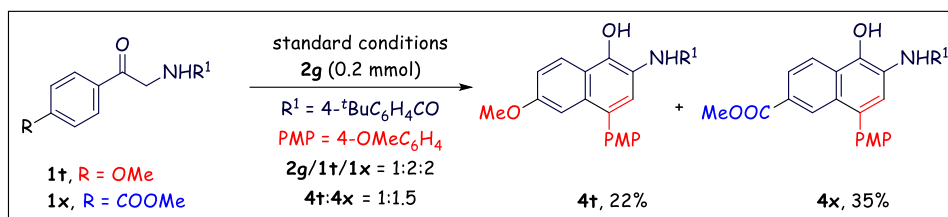

In a 25 mL Schlenk tube equipped with a stir bar was charged with **1t** (65.1 mg, 0.20 mmol, 2.0 equiv), **1x** (70.7 mg, 0.20 mmol, 2.0 equiv), 1-ethynyl-4-methoxybenzene (13.3 mg, 0.1 mmol, 1.0 equiv), DTBP (36.8  $\mu\text{L}$ , 0.2 mmol, 2.0 equiv) and LiCl (8.5 mg, 0.2 mmol, 2.0 equiv) in benzene (2.0 mL). The reaction was stirred at 120 °C for 16 h under N<sub>2</sub> atmosphere. After cooled to room temperature, the solvent was removed under reduced pressure, and the residue was purified by silica gel column chromatography using petroleum ether and ethyl acetate as eluents to obtain the desired products **4t** (10.2 mg, 22% yield) and **4x** (17.0 mg, 35% yield).

## b) Radical scavenger experiments

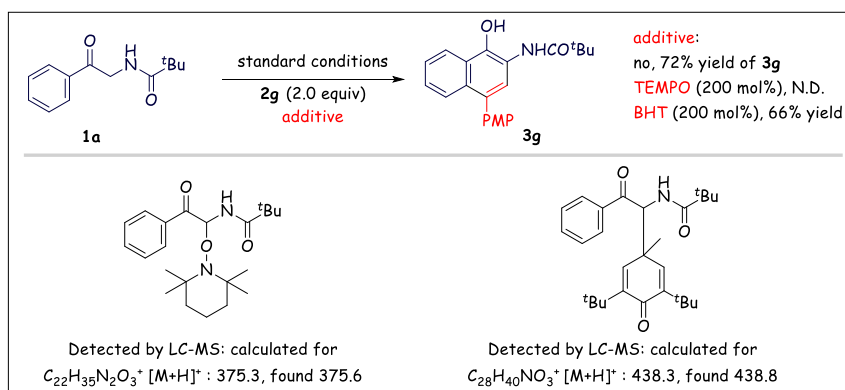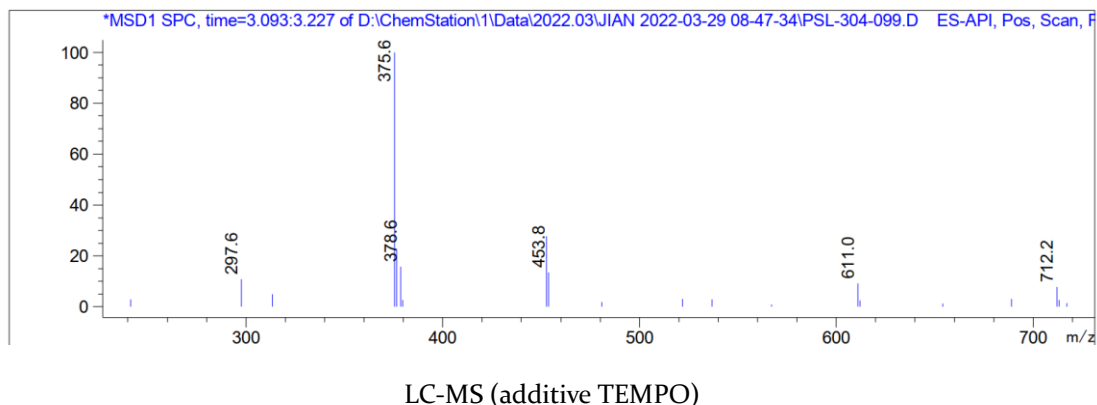

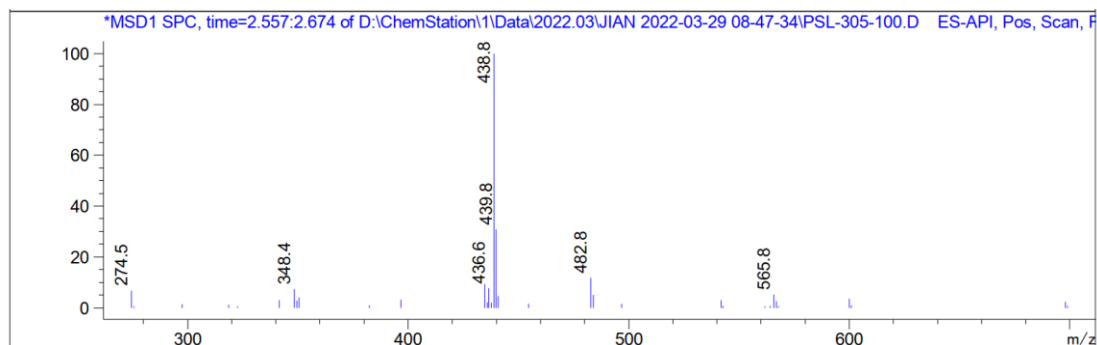

LC-MS (additive BHT)

### c) The effect of LiCl

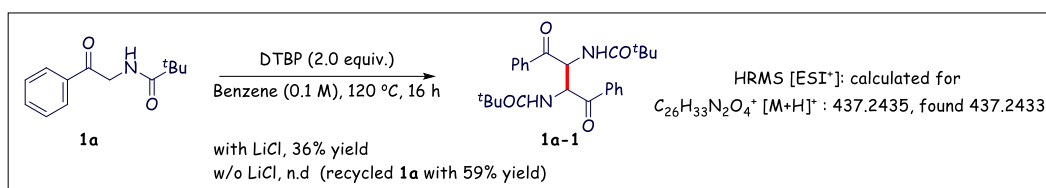

### *N,N'*-(1,4-dioxo-1,4-diphenylbutane-2,3-diyl)bis(2,2-dimethylpropanamide) (1a-1):

Yield: 20%; pale-yellow oil; <sup>1</sup>H NMR (400 MHz, DMSO) δ 7.89 (d, *J* = 7.8 Hz, 2H), 7.63 (t, *J* = 7.3 Hz, 1H), 7.51 (t, *J* = 7.6 Hz, 2H), 5.83 (d, *J* = 8.3 Hz, 1H), 0.96 (s, 9H); <sup>13</sup>C NMR (101 MHz, DMSO) δ 196.36, 177.17, 135.09, 133.29, 128.52, 128.11, 52.82, 38.04, 27.05. HRMS [ESI<sup>+</sup>]: calculated for C<sub>26</sub>H<sub>33</sub>N<sub>2</sub>O<sub>4</sub><sup>+</sup> [M+H]<sup>+</sup>: 437.2435, found 437.2433.

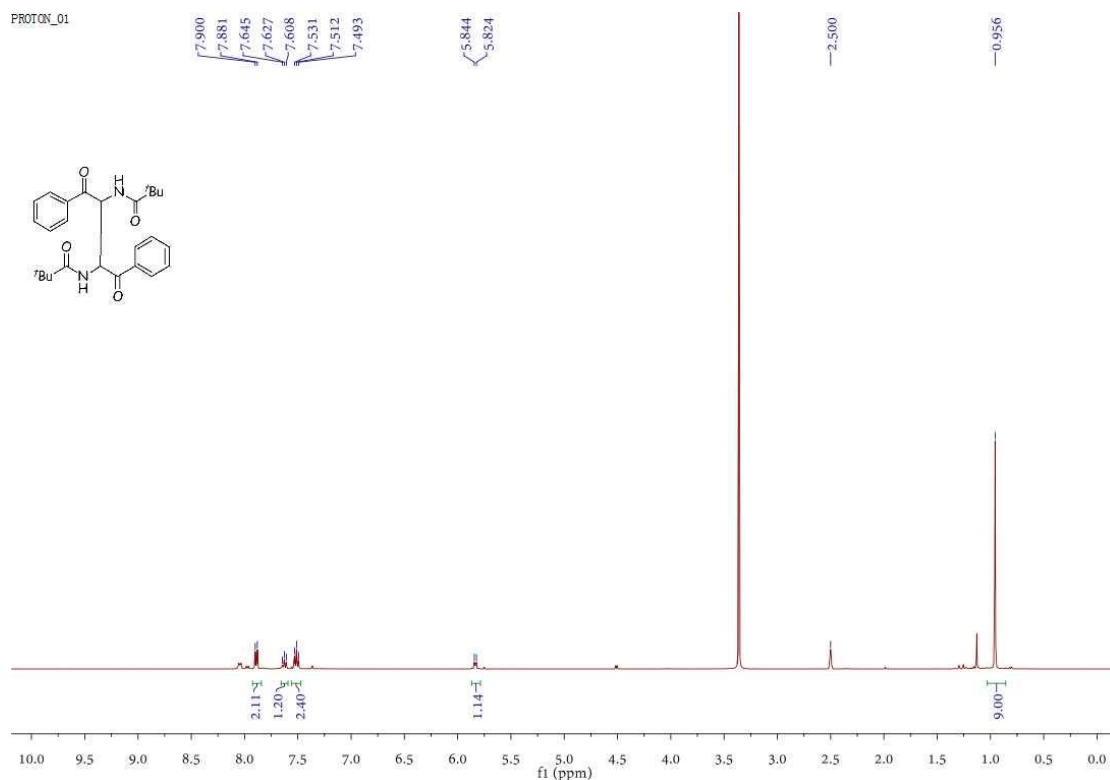

<sup>1</sup>H-NMR spectrum of compound 1a-1 (400 MHz, DMSO)

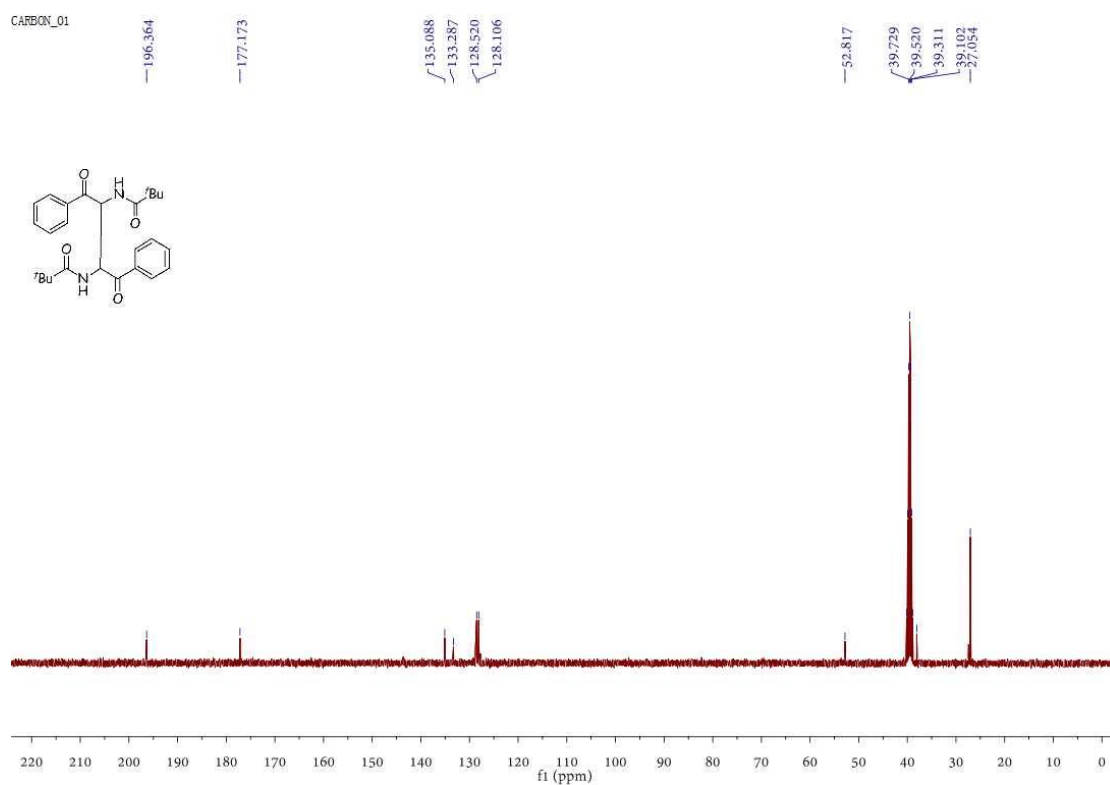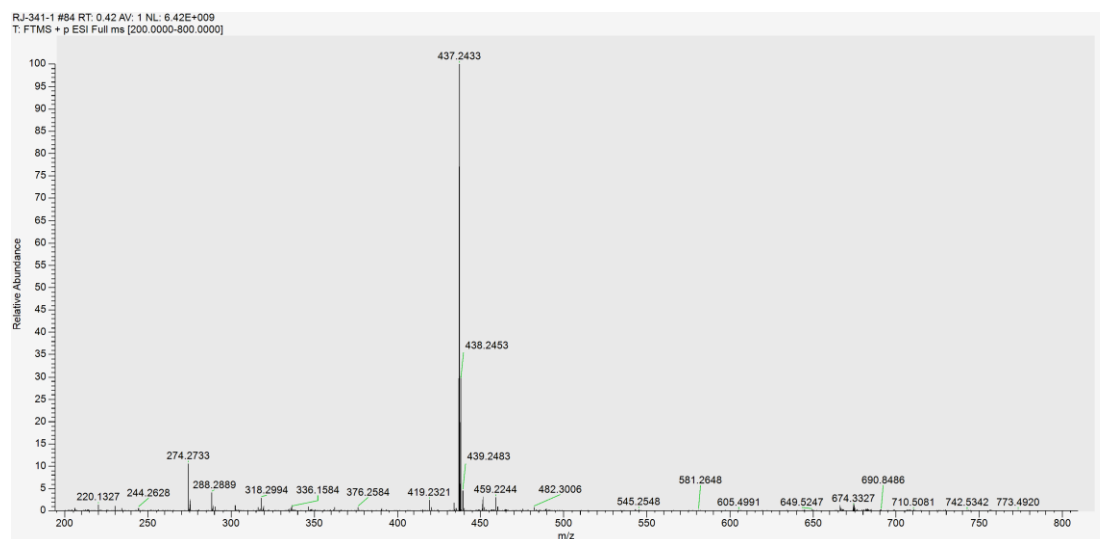

#### d) H/D Exchange experiments



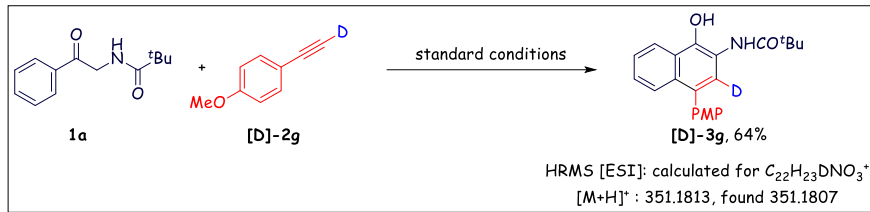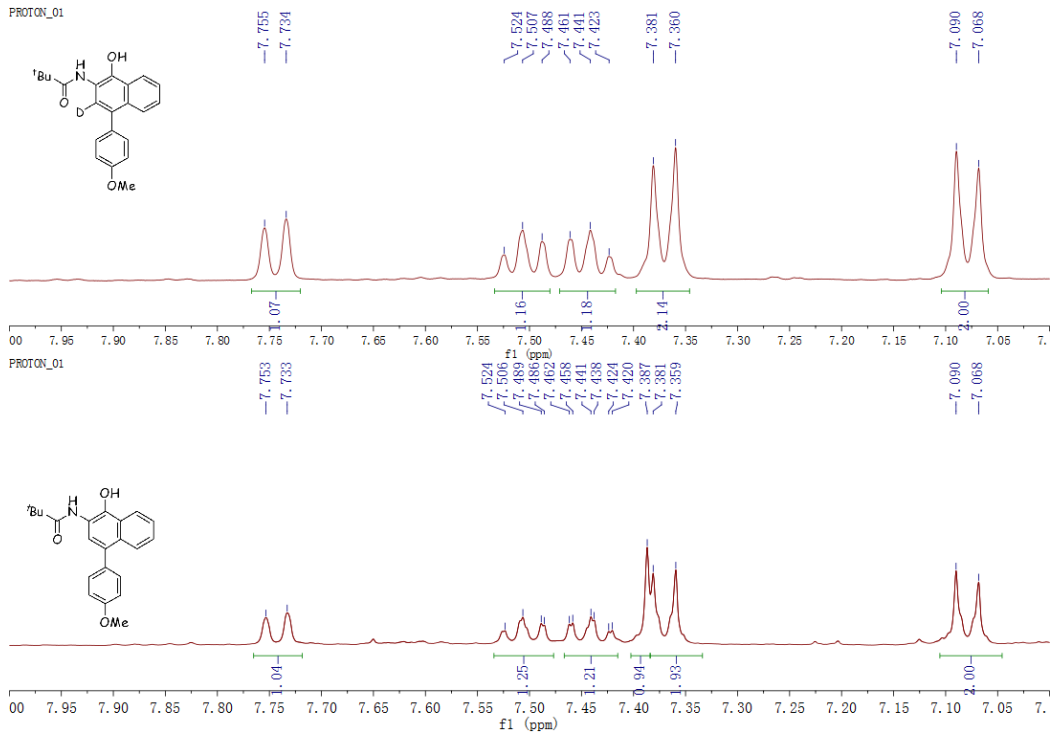

H/D exchange experiments : <sup>1</sup>H-NMR spectrum comparison (400 MHz, DMSO)

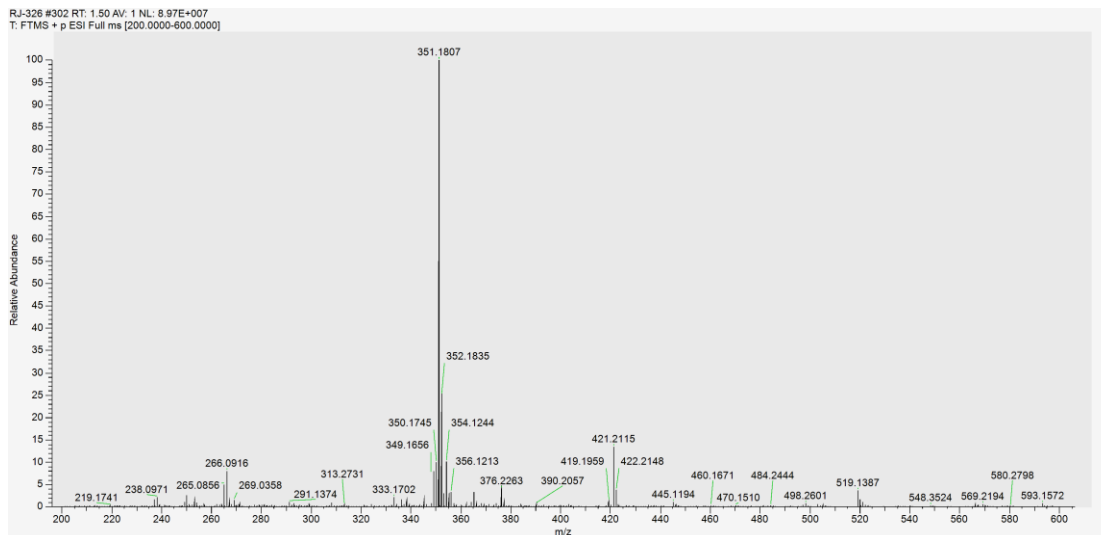

HRMS of compound **[D]-3g**

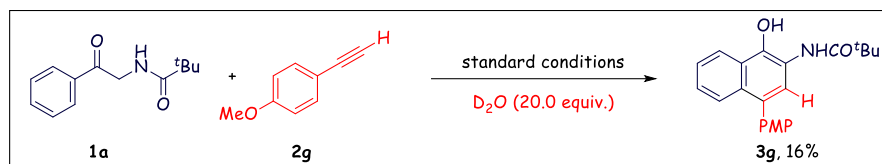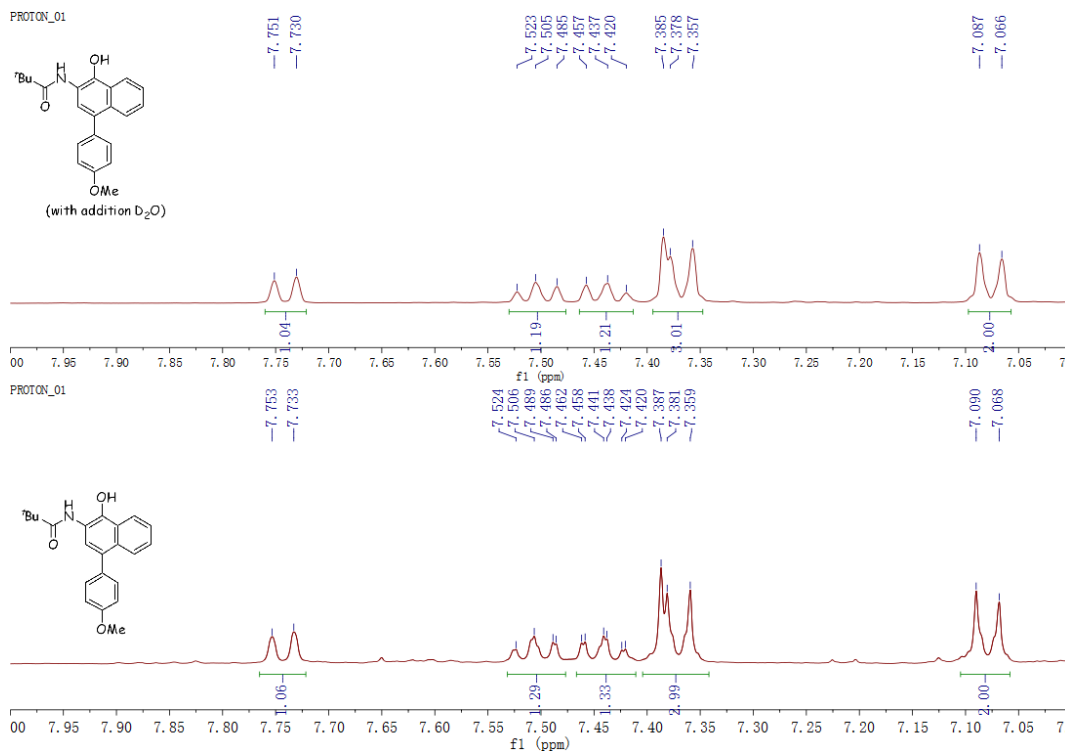

H/D exchange experiments :  $^1\text{H}$ -NMR spectrum comparison (400 MHz, DMSO)

## VI. Substrate scope (The products shown below were not obtained)

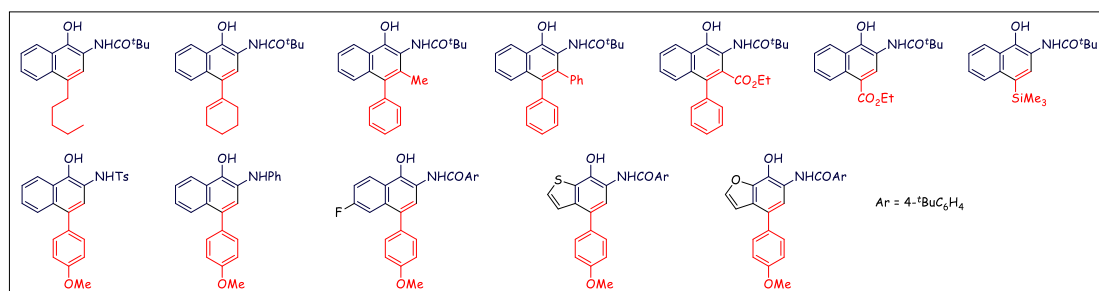

## VII. Experimental data for the described substances

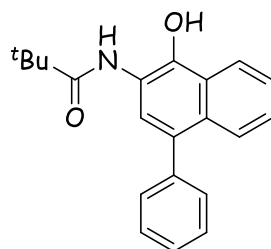

***N*-(1-hydroxy-4-phenylnaphthalen-2-yl)pivalamide (3a)**: Yield: 61%; pale-yellow oil; <sup>1</sup>H NMR (400 MHz, DMSO-*d*<sub>6</sub>) δ 9.90 (s, 1H), 9.57 (s, 1H), 8.34 – 8.27 (m, 1H), 7.74 (d, *J* = 8.2 Hz, 1H), 7.56 – 7.49 (m, 3H), 7.48 – 7.40 (m, 5H), 1.31 (s, 9H); <sup>13</sup>C NMR (101 MHz, DMSO-*d*<sub>6</sub>) δ 178.92, 143.22, 139.70, 131.10, 129.80, 129.68, 128.47, 127.19, 126.63, 125.99, 125.32, 124.94, 124.40, 122.70, 120.16, 39.94, 27.37; HRMS [ESI]: calculated for C<sub>21</sub>H<sub>22</sub>NO<sub>2</sub><sup>+</sup> [M+H]<sup>+</sup> : 320.1645, found 320.1649.

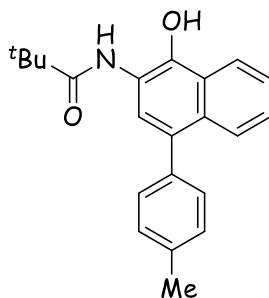

***N*-(1-hydroxy-4-(*p*-tolyl)naphthalen-2-yl)pivalamide (3b)**: Yield: 40%; pale-yellow oil; <sup>1</sup>H NMR (400 MHz, DMSO-*d*<sub>6</sub>) δ 9.88 (s, 1H), 9.61 (s, 1H), 8.31 (d, *J* = 8.3 Hz, 1H), 7.75 (d, *J* = 8.4 Hz, 1H), 7.54 – 7.48 (m, 1H), 7.44 (d, *J* = 8.0 Hz, 1H), 7.41 (s, 1H), 7.36 – 7.29 (m, 4H), 2.39 (s, 3H), 1.31 (s, 9H); <sup>13</sup>C NMR (101 MHz, DMSO-*d*<sub>6</sub>) δ 178.96, 143.11, 136.79, 136.34, 131.14, 129.85, 129.69, 129.06, 126.71, 125.90, 125.28, 125.05, 124.25, 122.72, 120.20, 39.10, 27.40, 20.84; HRMS [ESI]: calculated for C<sub>22</sub>H<sub>24</sub>NO<sub>2</sub><sup>+</sup> [M+H]<sup>+</sup> : 334.1802, found 334.1791.

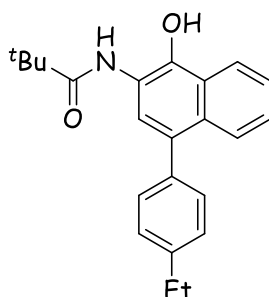

***N*-(4-(4-ethylphenyl)-1-hydroxynaphthalen-2-yl)pivalamide (3c)**: Yield: 50%; yellow solid; <sup>1</sup>H NMR (400 MHz, DMSO-*d*<sub>6</sub>) δ 9.84 (s, 1H), 9.56 (s, 1H), 8.34 – 8.25 (m, 1H), 7.75 (d, *J* = 8.2 Hz, 1H), 7.51 (m, 1H), 7.44 (m, 1H), 7.40 (s, 1H), 7.35 (m, 4H), 2.69 (q, *J* = 7.6 Hz, 2H), 1.30 (s, 9H), 1.25 (t, *J* = 7.6 Hz, 3H); <sup>13</sup>C NMR (101 MHz, DMSO-*d*<sub>6</sub>) δ 179.01, 143.14, 142.75, 137.08, 131.20, 129.84, 129.80, 127.92, 126.71, 125.97, 125.35, 125.10, 124.35, 122.73, 120.25, 39.16, 27.99, 27.43, 15.73; HRMS [ESI]: calculated for C<sub>23</sub>H<sub>26</sub>NO<sub>2</sub><sup>+</sup> [M+H]<sup>+</sup> : 348.1958, found 348.1949.

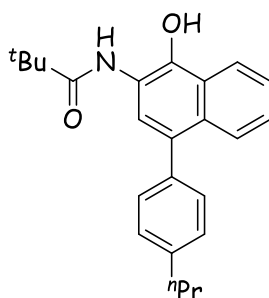

***N*-(1-hydroxy-4-(4-propylphenyl)naphthalen-2-yl)pivalamide (3d)**: Yield: 47%; yellow oil; <sup>1</sup>H NMR (400 MHz, DMSO-*d*<sub>6</sub>) δ 9.86 (s, 1H), 9.56 (s, 1H), 8.30 (m, 1H), 7.75 (d, *J* = 8.0 Hz, 1H), 7.50 (m, 1H), 7.46 – 7.41 (m, 1H), 7.40 (s, 1H), 7.33 (m, 4H), 2.67 – 2.60 (m, 2H), 1.65 (dq, *J* = 15.0, 7.4 Hz, 2H), 1.30 (s, 9H), 0.94 (t, *J* = 7.3 Hz, 3H); <sup>13</sup>C NMR (101 MHz, DMSO-*d*<sub>6</sub>) δ 179.02, 143.12, 141.11, 137.10, 131.20, 129.83, 129.71, 128.50, 126.72, 125.97, 125.35, 125.09, 124.36, 122.74, 120.25, 39.16, 37.05, 27.42, 24.18, 13.75; HRMS [ESI]: calculated for C<sub>24</sub>H<sub>28</sub>NO<sub>2</sub><sup>+</sup> [M+H]<sup>+</sup> : 362.2115, found 362.2110.

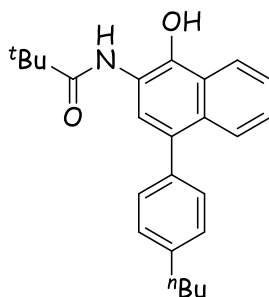

***N*-(4-(4-butylphenyl)-1-hydroxynaphthalen-2-yl)pivalamide (3e)**: Yield: 61%; yellow oil; <sup>1</sup>H NMR (400 MHz, DMSO-*d*<sub>6</sub>) δ 9.86 (s, 1H), 9.55 (s, 1H), 8.30 (d, *J* = 8.3 Hz, 1H), 7.75 (d, *J* = 8.3 Hz, 1H), 7.54 – 7.48 (m, 1H), 7.45 (dd, *J* = 11.1, 4.1 Hz, 1H), 7.40 (s, 1H), 7.34 (m, 4H), 2.67 (t, *J* = 7.6 Hz, 2H), 1.63 (dt, *J* = 15.2, 7.5 Hz, 2H), 1.40 – 1.33 (m, 2H), 1.32 (s, 9H), 0.93 (t, *J* = 7.6 Hz, 3H); <sup>13</sup>C NMR (101 MHz, DMSO-*d*<sub>6</sub>) δ 178.90, 143.05, 141.22, 136.99, 131.09, 129.75, 129.65, 128.38, 126.64, 125.90, 125.26, 125.02, 124.32, 122.68, 120.16, 39.31, 34.56, 33.18, 27.37, 21.79, 13.85; HRMS [ESI]: calculated for C<sub>25</sub>H<sub>30</sub>NO<sub>2</sub><sup>+</sup> [M+H]<sup>+</sup> : 376.2271, found 376.2262.

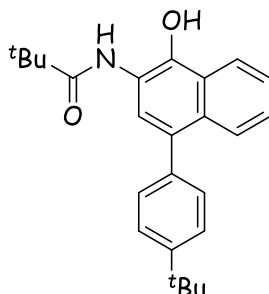

***N*-(4-(4-*tert*-butylphenyl)-1-hydroxynaphthalen-2-yl)pivalamide (3f)**: Yield: 45%; yellow oil; <sup>1</sup>H NMR (400 MHz, DMSO-*d*<sub>6</sub>) δ 9.86 (s, 1H), 9.53 (s, 1H), 8.30 (d, *J* = 8.5 Hz, 1H), 7.77 (d, *J* = 8.2 Hz, 1H), 7.55 – 7.52 (m, 2H), 7.50 (dd, *J* = 8.3, 1.2 Hz, 1H), 7.45 (dd, *J* = 8.3, 1.3 Hz, 1H), 7.42 – 7.37 (m, 3H), 1.35 (s, 9H), 1.31 (s, 9H); <sup>13</sup>C NMR (101 MHz, DMSO-*d*<sub>6</sub>) δ 178.86, 149.50, 143.08, 136.79, 130.99, 129.72, 129.46, 126.64, 125.88, 125.24, 125.20, 125.05, 124.41, 122.67, 120.19, 39.94, 34.32, 31.19, 27.36; HRMS [ESI]: calculated for C<sub>25</sub>H<sub>30</sub>NO<sub>2</sub><sup>+</sup> [M+H]<sup>+</sup> : 376.2271, found 376.2263.

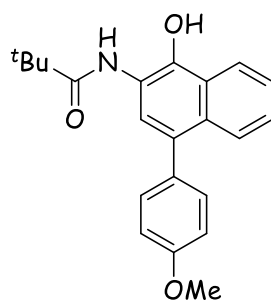

***N*-(1-hydroxy-4-(4-methoxyphenyl)naphthalen-2-yl)pivalamide (3g)**: Yield: 72%; pale-yellow solid; <sup>1</sup>H NMR (400 MHz, DMSO-*d*<sub>6</sub>) δ 9.83 (s, 1H), 9.57 (s, 1H), 8.29 (d, *J* = 7.8 Hz, 1H), 7.74 (d, *J* = 8.1 Hz, 1H), 7.50 (dd, *J* = 11.1, 4.0 Hz, 1H), 7.47 – 7.41 (m, 1H), 7.40 – 7.34 (m, 3H), 7.08 (d, *J* = 8.7 Hz, 2H), 3.83 (s, 3H), 1.31 (s, 9H); <sup>13</sup>C NMR (101 MHz, DMSO-*d*<sub>6</sub>) δ 178.90, 158.46, 142.92, 131.87, 130.88, 129.92, 126.67, 125.85, 125.24, 125.05, 124.23, 122.67, 120.15, 113.91, 55.18, 39.73, 27.38; HRMS [ESI]: calculated for C<sub>22</sub>H<sub>24</sub>NO<sub>2</sub><sup>+</sup> [M+H]<sup>+</sup> : 350.1751, found 350.1740.

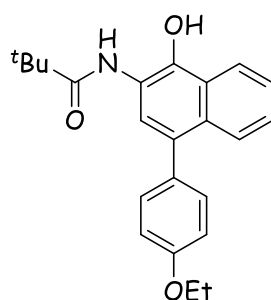

***N*-(4-(4-ethoxyphenyl)-1-hydroxynaphthalen-2-yl)pivalamide (3h)**: Yield: 61%; pale-yellow oil; <sup>1</sup>H NMR (400 MHz, DMSO-*d*<sub>6</sub>) δ 9.84 (s, 1H), 9.59 (s, 1H), 8.29 (d, *J* = 8.3 Hz, 1H), 7.75 (d, *J* = 8.3 Hz, 1H), 7.53 – 7.47 (m, 1H), 7.44 (s, 1H), 7.38 (s, 1H), 7.35 (d, *J* = 8.2 Hz, 2H), 7.06 (d, *J* = 8.3 Hz, 2H), 4.09 (q, *J* = 6.9 Hz, 2H), 1.37 (t, *J* = 6.9 Hz, 3H), 1.31 (s, 9H); <sup>13</sup>C NMR (101 MHz, DMSO-*d*<sub>6</sub>) δ 178.93, 157.74, 142.93, 131.75, 130.89, 129.94, 126.69, 125.87, 125.26, 125.08, 124.25, 122.70, 120.16, 114.36, 63.10, 39.12, 27.40, 14.76; HRMS [ESI]: calculated for C<sub>23</sub>H<sub>26</sub>NO<sub>2</sub><sup>+</sup> [M+H]<sup>+</sup> : 364.1907, found 364.1898.

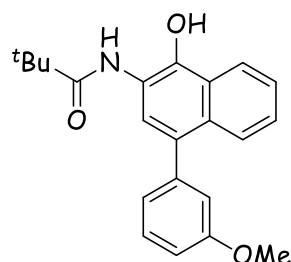

***N*-(1-hydroxy-4-(3-methoxyphenyl)naphthalen-2-yl)pivalamide (3i)**: Yield: 60%; pale-yellow oil; <sup>1</sup>H NMR (400 MHz, DMSO-*d*<sub>6</sub>) δ 9.90 (s, 1H), 9.59 (s, 1H), 8.30 (d, *J* = 8.3 Hz, 1H), 7.77 (d, *J* = 8.3 Hz, 1H), 7.54 – 7.49 (m, 1H), 7.48 – 7.40 (m, 3H), 7.04 – 6.96 (m, 3H), 3.81 (s, 3H), 1.31 (s, 9H); <sup>13</sup>C NMR (101 MHz, DMSO-*d*<sub>6</sub>) δ 178.98, 159.27, 143.32, 141.12, 130.98, 129.72, 129.52, 126.63, 126.03, 125.35, 125.03, 124.31, 122.71, 122.20, 120.09, 115.41, 112.69, 55.18, 39.72, 27.40; HRMS [ESI]: calculated for C<sub>22</sub>H<sub>24</sub>NO<sub>2</sub><sup>+</sup> [M+H]<sup>+</sup> : 350.1751, found 350.1742.

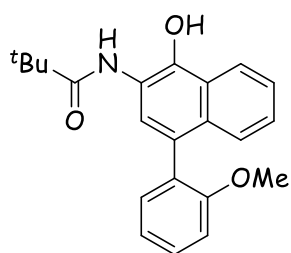

***N*-(1-hydroxy-4-(2-methoxyphenyl)naphthalen-2-yl)pivalamide (3j)**: Yield: 67%; pale-yellow oil; <sup>1</sup>H NMR (400 MHz, CD<sub>3</sub>OD) δ 8.32 (d, *J* = 8.4 Hz, 1H), 7.43 (d, *J* = 7.0 Hz, 1H), 7.41 – 7.35 (m, 2H), 7.33 – 7.28 (m, 1H), 7.24 (s, 1H), 7.22 (dd, *J* = 7.4, 1.3 Hz, 1H), 7.10 – 7.01 (m, 2H), 3.64 (s, 3H), 1.37 (s, 9H); <sup>13</sup>C NMR (101 MHz, CD<sub>3</sub>OD) δ 181.32, 158.83, 144.76, 132.89, 132.72, 130.79, 130.36, 130.15, 128.21, 127.03, 126.46, 126.04, 124.82, 123.54, 121.58, 120.99, 112.11, 55.80, 40.49, 27.99; HRMS [ESI]: calculated for C<sub>22</sub>H<sub>24</sub>NO<sub>2</sub><sup>+</sup> [M+H]<sup>+</sup> : 350.1751, found 350.1743.

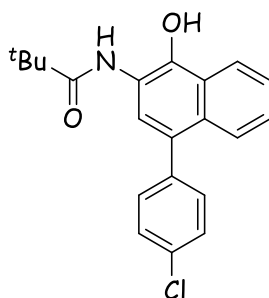

***N*-(4-(4-chlorophenyl)-1-hydroxynaphthalen-2-yl)pivalamide (3k)**: Yield: 40%; yellow oil; <sup>1</sup>H NMR (400 MHz, DMSO-*d*<sub>6</sub>) δ 9.95 (s, 1H), 9.59 (s, 1H), 8.31 (d, *J* = 8.3 Hz, 1H), 7.70 (d, *J* = 8.3 Hz, 1H), 7.57 (m, 2H), 7.55 – 7.50 (m, 1H), 7.47 (m, 3H), 7.43 (s, 1H), 1.31 (s, 9H); <sup>13</sup>C NMR (101 MHz, DMSO-*d*<sub>6</sub>) δ 179.34, 143.96, 138.92, 132.39, 132.00, 130.05, 129.91, 128.91, 127.01, 126.61, 125.84, 125.11, 124.96, 123.17, 120.57, 39.10, 27.76; HRMS [ESI]: calculated for C<sub>21</sub>H<sub>21</sub><sup>35</sup>ClNO<sub>2</sub><sup>+</sup> [M+H]<sup>+</sup> : 354.1255, found 354.1247, C<sub>21</sub>H<sub>21</sub><sup>37</sup>ClNO<sub>2</sub><sup>+</sup> [M+H]<sup>+</sup> : 356.1226, found 356.1215.

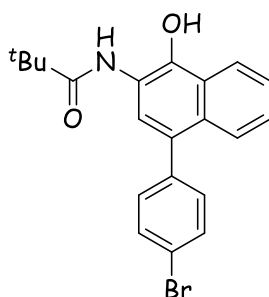

***N*-(4-(4-bromophenyl)-1-hydroxynaphthalen-2-yl)pivalamide (3l)**: Yield: 40%; brown oil; <sup>1</sup>H NMR (400 MHz, DMSO-*d*<sub>6</sub>) δ 9.95 (s, 1H), 9.59 (s, 1H), 8.31 (d, *J* = 8.3 Hz, 1H), 7.70 (m, 3H), 7.49 (m, 2H), 7.42 (d, *J* = 2.4 Hz, 2H), 7.40 (s, 1H), 1.31 (s, 9H); <sup>13</sup>C NMR (101 MHz, DMSO-*d*<sub>6</sub>) δ 179.33, 143.98, 139.29, 132.33, 131.83, 130.06, 129.84, 127.02, 126.62, 125.85, 125.11, 124.91, 123.17, 120.95, 120.58, 39.12, 27.76; HRMS [ESI]: calculated for C<sub>21</sub>H<sub>21</sub><sup>79</sup>BrNO<sub>2</sub><sup>+</sup> [M+H]<sup>+</sup> : 398.0750, found 398.0743, C<sub>21</sub>H<sub>21</sub><sup>81</sup>BrNO<sub>2</sub><sup>+</sup> [M+H]<sup>+</sup> : 400.0730, found 400.0720.

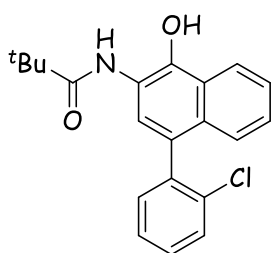

**N-(4-(2-chlorophenyl)-1-hydroxynaphthalen-2-yl)pivalamide (3m)**: Yield: 55%; yellow oil;  $^1\text{H}$  NMR (400 MHz,  $\text{DMSO-}d_6$ )  $\delta$  9.95 (s, 1H), 9.61 (s, 1H), 8.30 (d,  $J = 8.3$  Hz, 1H), 7.63 (d,  $J = 6.9$  Hz, 1H), 7.50 (m, 3H), 7.42 (m, 2H), 7.38 (s, 1H), 7.24 (d,  $J = 8.3$  Hz, 1H), 1.31 (s, 9H);  $^{13}\text{C}$  NMR (101 MHz,  $\text{DMSO-}d_6$ )  $\delta$  179.32, 144.08, 138.61, 133.69, 132.81, 130.27, 129.99, 129.75, 128.78, 127.73, 126.69, 126.47, 125.76, 125.39, 124.73, 123.03, 120.42, 39.11, 27.75; HRMS [ESI]: calculated for  $\text{C}_{21}\text{H}_{21}^{35}\text{ClNO}_2^+$   $[\text{M}+\text{H}]^+$  : 354.1255, found 354.1247,  $\text{C}_{21}\text{H}_{21}^{37}\text{ClNO}_2^+$   $[\text{M}+\text{H}]^+$  : 356.1226, found 356.1214.

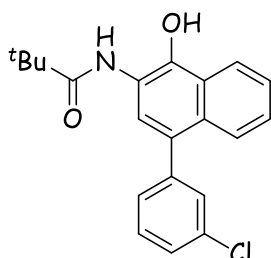

**N-(4-(3-chlorophenyl)-1-hydroxynaphthalen-2-yl)pivalamide (3n)**: Yield: 51%; yellow oil;  $^1\text{H}$  NMR (400 MHz,  $\text{DMSO-}d_6$ )  $\delta$  10.01 (s, 1H), 9.58 (s, 1H), 8.31 (d,  $J = 8.3$  Hz, 1H), 7.71 (d,  $J = 8.2$  Hz, 1H), 7.56 (d,  $J = 7.7$  Hz, 1H), 7.53 (d,  $J = 4.3$  Hz, 2H), 7.51 – 7.48 (m, 2H), 7.46 (s, 1H), 7.43 (dd,  $J = 7.1, 1.1$  Hz, 1H), 1.31 (s, 9H);  $^{13}\text{C}$  NMR (101 MHz,  $\text{DMSO-}d_6$ )  $\delta$  179.38, 144.10, 142.23, 133.59, 130.70, 129.81, 129.78, 129.05, 127.57, 127.00, 126.72, 125.88, 125.11, 125.00, 123.20, 120.54, 39.11, 27.76; HRMS [ESI]: calculated for  $\text{C}_{21}\text{H}_{21}^{35}\text{ClNO}_2^+$   $[\text{M}+\text{H}]^+$  : 354.1255, found 354.1247,  $\text{C}_{21}\text{H}_{21}^{37}\text{ClNO}_2^+$   $[\text{M}+\text{H}]^+$  : 356.1226, found 356.1216.

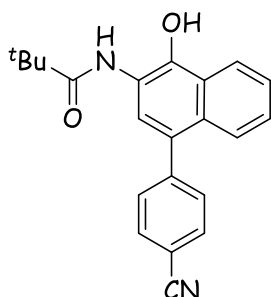

**N-(4-(4-cyanophenyl)-1-hydroxynaphthalen-2-yl)pivalamide (3o)**: Yield: 57%; brown solid;  $^1\text{H}$  NMR (400 MHz,  $\text{DMSO-}d_6$ )  $\delta$  10.06 (s, 1H), 9.56 (s, 1H), 8.33 (d,  $J = 7.8$  Hz, 1H), 7.98 (d,  $J = 8.3$  Hz, 2H), 7.69 (d,  $J = 9.2$  Hz, 1H), 7.67 (d,  $J = 8.3$  Hz, 2H), 7.54 (m, 2H), 7.49 (s, 1H), 1.31 (s, 9H);  $^{13}\text{C}$  NMR (101 MHz,  $\text{DMSO-}d_6$ )  $\delta$  178.95, 144.69, 144.13, 132.46, 130.80, 129.18, 129.13, 126.59, 126.47, 125.59, 124.92, 124.44, 122.86, 120.26, 118.92, 109.90, 39.10, 27.34; HRMS [ESI]: calculated for  $\text{C}_{21}\text{H}_{22}\text{N}_2\text{O}_2^+$   $[\text{M}+\text{H}]^+$  : 345.1598, found 345.1589.

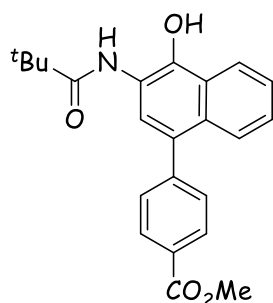

**Methyl 4-(4-hydroxy-3-pivalamidonaphthalen-1-yl)benzoate (3p):** Yield: 50%; pale-yellow solid;  $^1\text{H NMR}$  (400 MHz,  $\text{DMSO-}d_6$ )  $\delta$  10.02 (s, 1H), 9.58 (s, 1H), 8.33 (m, 1H), 8.11 (d,  $J = 8.3$  Hz, 2H), 7.73 (d,  $J = 8.1$  Hz, 1H), 7.62 (d,  $J = 8.3$  Hz, 2H), 7.54 (m, 1H), 7.49 (s, 1H), 7.48 – 7.45 (m, 1H), 3.90 (s, 3H), 1.31 (s, 9H);  $^{13}\text{C NMR}$  (101 MHz,  $\text{DMSO-}d_6$ )  $\delta$  178.97, 166.14, 144.66, 143.85, 130.19, 129.79, 129.39, 129.30, 128.29, 126.65, 126.32, 125.50, 124.70, 124.62, 122.82, 120.25, 52.21, 39.10, 27.34; HRMS [ESI]: calculated for  $\text{C}_{21}\text{H}_{22}\text{N}_2\text{O}_2^+$   $[\text{M}+\text{H}]^+$  : 345.1598, found 345.1589.

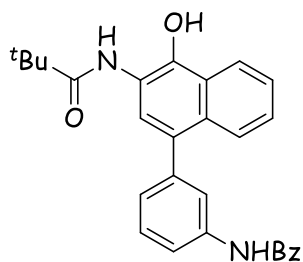

**N-(3-(4-hydroxy-3-pivalamidonaphthalen-1-yl)phenyl)benzamide (3q):** Yield: 51%; brown oil;  $^1\text{H NMR}$  (400 MHz,  $\text{DMSO-}d_6$ )  $\delta$  10.40 (s, 1H), 9.92 (s, 1H), 9.61 (s, 1H), 8.33 (d,  $J = 8.0$  Hz, 1H), 8.01 – 7.95 (m, 3H), 7.91 – 7.82 (m, 2H), 7.62 – 7.45 (m, 7H), 7.20 (d,  $J = 7.6$  Hz, 1H), 1.32 (s, 9H);  $^{13}\text{C NMR}$  (101 MHz,  $\text{DMSO-}d_6$ )  $\delta$  178.94, 165.73, 143.34, 140.08, 139.35, 134.94, 131.67, 131.01, 129.66, 128.76, 128.45, 127.72, 126.67, 126.07, 125.39, 125.18, 125.07, 124.40, 122.75, 121.65, 120.21, 119.03, 39.15, 27.41; HRMS [ESI]: calculated for  $\text{C}_{28}\text{H}_{27}\text{N}_2\text{O}_3^+$   $[\text{M}+\text{H}]^+$  : 439.2016, found 439.2015.

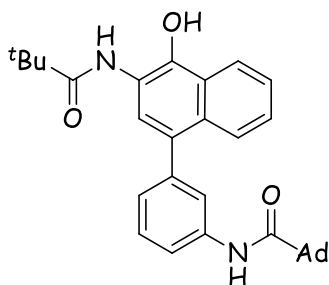

**(3s)-N-(3-(4-hydroxy-3-pivalamidonaphthalen-1-yl)phenyl)adamantane-1-carboxamide (3r):** Yield: 50%; brown oil;  $^1\text{H NMR}$  (400 MHz,  $\text{DMSO-}d_6$ )  $\delta$  9.89 (s, 1H), 9.58 (s, 1H), 9.24 (s, 1H), 8.31 (d,  $J = 9.9$  Hz, 1H), 7.97 – 7.93 (m, 1H), 7.84 – 7.77 (m, 2H), 7.53 – 7.47 (m, 2H), 7.43 (s, 1H), 7.40 (d,  $J = 7.8$  Hz, 1H), 7.11 (d,  $J = 7.7$  Hz, 1H), 2.01 (m, 3H), 1.92 (m, 6H), 1.69 (m, 6H), 1.31 (s, 9H);  $^{13}\text{C NMR}$  (101 MHz,  $\text{DMSO-}d_6$ )  $\delta$  178.91, 167.35, 143.16, 139.89, 139.56, 132.89, 131.15, 129.29, 128.59, 126.64, 125.97, 125.31, 125.06, 124.21, 122.70, 121.50, 120.21, 118.81, 41.00, 38.32, 36.04, 27.71, 27.39; HRMS [ESI]: calculated for  $\text{C}_{32}\text{H}_{37}\text{N}_2\text{O}_3^+$   $[\text{M}+\text{H}]^+$  : 497.2799, found 497.2795.



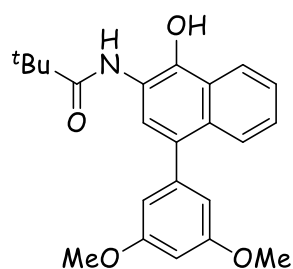

**N-(4-(3,5-dimethoxyphenyl)-1-hydroxynaphthalen-2-yl)pivalamide (3s):** Yield: 55%; brown oil;  $^1\text{H NMR}$  (400 MHz,  $\text{DMSO-}d_6$ )  $\delta$  11.00 (s, 1H), 9.88 (s, 1H), 9.58 (s, 1H), 8.29 (d,  $J = 8.3$  Hz, 1H), 7.78 (d,  $J = 8.3$  Hz, 1H), 7.48 (d,  $J = 7.1$  Hz, 1H), 7.42 (s, 1H), 6.58 (d,  $J = 1.7$  Hz, 1H), 6.56 (s, 2H), 3.79 (s, 6H), 1.30 (d,  $J = 6.5$  Hz, 9H);  $^{13}\text{C NMR}$  (101 MHz,  $\text{DMSO-}d_6$ )  $\delta$  179.02, 164.27, 160.39, 143.34, 141.76, 131.09, 129.72, 126.61, 126.04, 125.36, 124.06, 120.04, 109.63, 108.06, 99.07, 55.35, 27.41, 25.91; HRMS [ESI]: calculated for  $\text{C}_{23}\text{H}_{26}\text{NO}_2^+$   $[\text{M}+\text{H}]^+$  : 380.1856, found 380.1849.

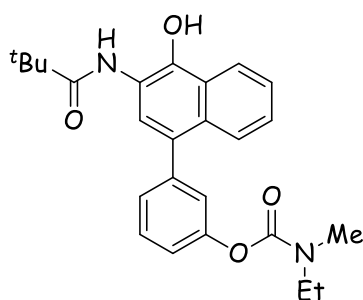

**3-(4-hydroxy-3-pivalamidonaphthalen-1-yl)phenyl ethyl(methyl)carbamate (3t):** Yield: 42%; pale-yellow oil;  $^1\text{H NMR}$  (400 MHz,  $\text{DMSO-}d_6$ )  $\delta$  9.96 (s, 1H), 9.59 (s, 1H), 8.31 (d,  $J = 8.1$  Hz, 1H), 7.77 (d,  $J = 8.3$  Hz, 1H), 7.53 – 7.46 (m, 3H), 7.45 (s, 1H), 7.31 (d,  $J = 7.6$  Hz, 1H), 7.19 (d,  $J = 7.9$  Hz, 2H), 3.44 (dd,  $J = 13.9, 6.9$  Hz, 1H), 3.33 – 3.28 (m, 1H), 2.97 (d,  $J = 52.5$  Hz, 3H), 1.31 (s, 9H), 1.26 – 1.17 (m, 3H);  $^{13}\text{C NMR}$  (101 MHz,  $\text{DMSO-}d_6$ )  $\delta$  179.38, 151.75, 143.83, 130.48, 129.90, 129.63, 129.16, 128.16, 127.04, 126.56, 125.79, 125.16, 124.90, 123.57, 123.16, 121.07, 120.55, 43.92, 39.12, 27.80, 27.77, 12.71; HRMS [ESI]: calculated for  $\text{C}_{25}\text{H}_{29}\text{N}_2\text{O}_4^+$   $[\text{M}+\text{H}]^+$  : 421.2122, found 421.2116.

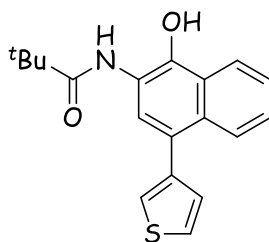

**N-(1-hydroxy-4-(thiophen-3-yl)naphthalen-2-yl)pivalamide (3u):** Yield: 59%; yellow oil;  $^1\text{H NMR}$  (400 MHz,  $\text{DMSO-}d_6$ )  $\delta$  9.89 (s, 1H), 9.58 (s, 1H), 8.30 (d,  $J = 8.0$  Hz, 1H), 7.88 (d,  $J = 8.2$  Hz, 1H), 7.74 – 7.70 (m, 1H), 7.61 (d,  $J = 2.9$  Hz, 1H), 7.55 – 7.46 (m, 3H), 7.32 – 7.29 (m, 1H), 1.32 (s, 9H);  $^{13}\text{C NMR}$  (101 MHz,  $\text{DMSO-}d_6$ )  $\delta$  178.93, 143.31, 140.00, 129.94, 129.42, 126.64, 126.33, 126.09, 125.93, 125.38, 124.99, 124.45, 123.57, 122.69, 120.15, 39.10, 27.40; HRMS [ESI]: calculated for  $\text{C}_{19}\text{H}_{20}\text{NO}_2\text{S}^+$   $[\text{M}+\text{H}]^+$  : 326.1209, found 326.1199.

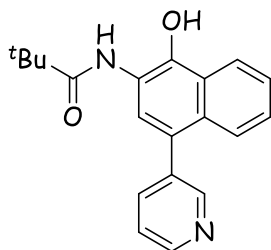

***N*-(1-hydroxy-4-(pyridin-3-yl)naphthalen-2-yl)pivalamide (3v)**: Yield: 18%; yellow oil;  $^1\text{H}$  NMR (400 MHz,  $\text{DMSO-}d_6$ )  $\delta$  10.01 (s, 1H), 9.59 (s, 1H), 8.65 (d,  $J = 2.1$  Hz, 2H), 8.33 (d,  $J = 8.2$  Hz, 1H), 7.92 – 7.87 (m, 1H), 7.66 (d,  $J = 8.2$  Hz, 1H), 7.58 – 7.53 (m, 2H), 7.50 (d,  $J = 8.2$  Hz, 1H), 7.47 (s, 1H), 1.31 (s, 9H);  $^{13}\text{C}$  NMR (101 MHz,  $\text{DMSO-}d_6$ )  $\delta$  178.98, 150.02, 148.39, 144.03, 137.35, 135.40, 129.71, 127.28, 126.69, 126.44, 125.57, 125.09, 124.52, 123.58, 122.88, 120.32, 39.16, 27.40; HRMS [ESI]: calculated for  $\text{C}_{20}\text{H}_{21}\text{N}_2\text{O}_2^+$   $[\text{M}+\text{H}]^+$  : 321.1598, found 321.1588.

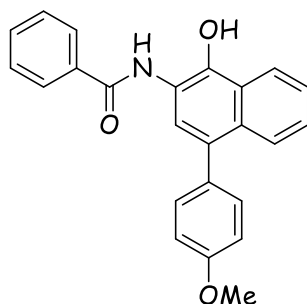

***N*-(1-hydroxy-4-(4-methoxyphenyl)naphthalen-2-yl)benzamide (4a)**: Yield: 50%; brown oil;  $^1\text{H}$  NMR (400 MHz,  $\text{DMSO-}d_6$ )  $\delta$  10.48 (s, 1H), 9.98 (s, 1H), 8.35 (d,  $J = 8.2$  Hz, 1H), 8.10 (d,  $J = 7.8$  Hz, 2H), 7.79 (d,  $J = 8.3$  Hz, 1H), 7.63 (d,  $J = 6.7$  Hz, 1H), 7.60 – 7.54 (m, 2H), 7.52 (d,  $J = 8.0$  Hz, 1H), 7.50 – 7.46 (m, 2H), 7.40 (d,  $J = 8.0$  Hz, 2H), 7.09 (d,  $J = 7.9$  Hz, 2H), 3.83 (s, 3H);  $^{13}\text{C}$  NMR (101 MHz,  $\text{DMSO-}d_6$ )  $\delta$  167.15, 158.87, 144.38, 133.94, 132.48, 132.28, 131.31, 131.19, 130.64, 128.90, 128.49, 126.97, 126.48, 125.66, 125.50, 125.32, 123.21, 120.03, 114.34, 55.57; HRMS [ESI]: calculated for  $\text{C}_{24}\text{H}_{20}\text{NO}_3^+$   $[\text{M}+\text{H}]^+$  : 370.1438, found 370.1430.

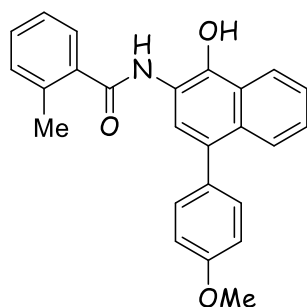

***N*-(1-hydroxy-4-(4-methoxyphenyl)naphthalen-2-yl)-2-methylbenzamide (4b)**: Yield: 44%; brown oil;  $^1\text{H}$  NMR (400 MHz,  $\text{DMSO-}d_6$ )  $\delta$  10.57 (s, 1H), 10.08 (s, 1H), 8.35 (d,  $J = 8.0$  Hz, 1H), 7.78 (d,  $J = 8.3$  Hz, 1H), 7.67 (d,  $J = 7.2$  Hz, 1H), 7.58 – 7.42 (m, 4H), 7.41 – 7.32 (m, 4H), 7.09 (d,  $J = 8.6$  Hz, 2H), 3.83 (s, 3H), 2.47 (s, 3H);  $^{13}\text{C}$  NMR (101 MHz,  $\text{DMSO-}d_6$ )  $\delta$  169.44, 158.51, 143.11, 135.85, 135.59, 131.87, 131.02, 130.92, 130.73, 130.27, 130.14, 127.85, 126.69, 126.04, 125.73, 125.35, 125.11, 123.93,

122.80, 119.92, 113.96, 55.18, 19.55; HRMS [ESI]: calculated for  $C_{25}H_{22}NO_3^+$   $[M+H]^+$  : 384.1594, found 384.1583.

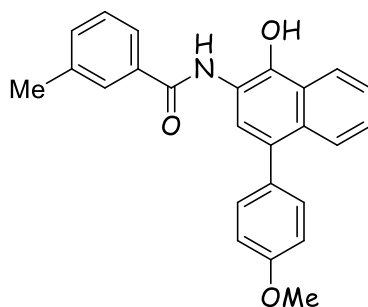

***N*-(1-hydroxy-4-(4-methoxyphenyl)naphthalen-2-yl)-3-methylbenzamide (4c)**: Yield: 41%; brown oil;  $^1H$  NMR (400 MHz, acetone- $d_6$ )  $\delta$  10.24 (s,  $J$  = 1.6 Hz, 1H), 10.10 (s, 1H), 8.47 (d,  $J$  = 8.3 Hz, 1H), 8.00 – 7.93 (m, 2H), 7.83 (d,  $J$  = 8.4 Hz, 1H), 7.54 (m, 1H), 7.46 (m, 3H), 7.41 (d,  $J$  = 2.9 Hz, 2H), 7.39 (s, 1H), 7.07 (d,  $J$  = 8.6 Hz, 2H), 3.87 (s, 3H), 2.43 (s, 3H);  $^{13}C$  NMR (101 MHz, acetone- $d_6$ )  $\delta$  168.60, 159.92, 144.69, 139.31, 133.98, 133.88, 133.15, 132.90, 132.82, 131.86, 129.41, 129.38, 128.57, 126.84, 126.13, 125.98, 124.30, 124.02, 120.57, 114.60, 55.59, 21.32; HRMS [ESI]: calculated for  $C_{25}H_{22}NO_3^+$   $[M+H]^+$  : 384.1594, found 384.1584.

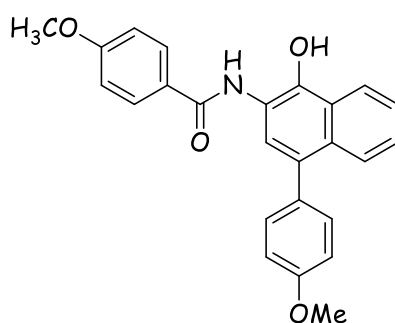

***N*-(1-hydroxy-4-(4-methoxyphenyl)naphthalen-2-yl)-4-methoxybenzamide (4d)**: Yield: 43%; brown oil;  $^1H$  NMR (400 MHz, DMSO- $d_6$ )  $\delta$  10.41 (s, 1H), 10.12 (s, 1H), 8.35 (d,  $J$  = 8.3 Hz, 1H), 8.10 (d,  $J$  = 8.5 Hz, 2H), 7.78 (d,  $J$  = 8.3 Hz, 1H), 7.53 (m, 1H), 7.49 – 7.43 (m, 2H), 7.40 (d,  $J$  = 8.1 Hz, 2H), 7.10 (m, 4H), 3.86 (s, 3H), 3.83 (s, 3H);  $^{13}C$  NMR (101 MHz, DMSO- $d_6$ )  $\delta$  166.72, 162.78, 158.86, 144.12, 132.29, 131.31, 131.20, 130.54, 127.09, 126.40, 125.72, 125.65, 125.46, 125.12, 123.21, 120.25, 114.33, 114.18, 55.91, 55.56; HRMS [ESI]: calculated for  $C_{25}H_{22}NO_4^+$   $[M+H]^+$  : 400.1543, found 400.1534.

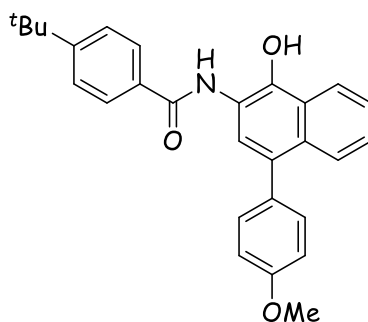

**4-(*tert*-butyl)-*N*-(1-hydroxy-4-(4-methoxyphenyl)naphthalen-2-yl)benzamide (4e):** Yield: 67%; brown solid; <sup>1</sup>H NMR (400 MHz, DMSO-*d*<sub>6</sub>) δ 10.44 (s, 1H), 10.03 (s, 1H), 8.36 – 8.31 (m, 1H), 8.07 – 8.01 (m, 2H), 7.78 (d, *J* = 8.2 Hz, 1H), 7.58 (d, *J* = 8.5 Hz, 2H), 7.55 – 7.50 (m, 1H), 7.49 – 7.50 – 7.43 (m, 2H), 7.42 – 7.37 (m, 2H), 7.12 – 7.06 (m, 2H), 3.83 (s, 3H), 1.33 (s, 9H); <sup>13</sup>C NMR (101 MHz, acetone-*d*<sub>6</sub>) δ 168.36, 159.90, 156.70, 144.66, 133.16, 132.78, 131.86, 131.15, 129.59, 128.77, 128.57, 128.22, 126.79, 126.40, 126.12, 124.29, 124.01, 120.63, 114.58, 55.58, 35.56, 31.34; HRMS [ESI]: calculated for C<sub>28</sub>H<sub>28</sub>NO<sub>3</sub><sup>+</sup> [M+H]<sup>+</sup>: 426.2064, found 426.2060.

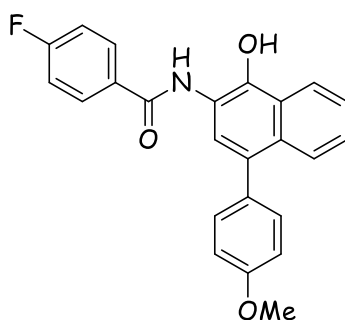

**4-fluoro-*N*-(1-hydroxy-4-(4-methoxyphenyl)naphthalen-2-yl)benzamide (4f):** Yield: 50%; yellow oil; <sup>1</sup>H NMR (400 MHz, acetone-*d*<sub>6</sub>) δ 10.19 (s, 1H), 10.11 (s, *J* = 8.2 Hz, 1H), 8.47 (d, *J* = 8.3 Hz, 1H), 8.24 (m, 2H), 7.83 (d, *J* = 8.4 Hz, 1H), 7.54 (m, 1H), 7.49 – 7.44 (m, 1H), 7.41 (d, *J* = 4.2 Hz, 2H), 7.39 (s, 1H), 7.33 (m, 2H), 7.07 (d, *J* = 8.5 Hz, 2H), 3.87 (s, 3H); <sup>13</sup>C NMR (101 MHz, acetone-*d*<sub>6</sub>) δ 167.33, 165.98 (d, *J* = 251.0 Hz), 159.91, 144.71, 133.10, 132.86, 131.85, 131.70, 131.61, 130.45 (d, *J* = 3.2 Hz), 128.49, 126.89, 126.14, 124.33, 123.98, 120.44, 116.38 (d, *J* = 22.2 Hz), 114.59, 55.57; <sup>19</sup>F NMR (376 MHz, acetone-*d*<sub>6</sub>) δ -108.72; HRMS [ESI]: calculated for C<sub>24</sub>H<sub>19</sub>FNO<sub>3</sub><sup>+</sup> [M+H]<sup>+</sup>: 388.1343, found 388.1332.

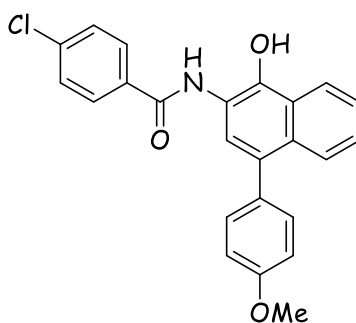

**4-chloro-*N*-(1-hydroxy-4-(4-methoxyphenyl)naphthalen-2-yl)benzamide (4g):** Yield: 51%; yellow oil; <sup>1</sup>H NMR (400 MHz, DMSO-*d*<sub>6</sub>) δ 10.47 (s, 1H), 9.87 (s, 1H), 8.34 (d, *J* = 8.3 Hz, 1H), 8.11 (d, *J* = 8.3 Hz, 2H), 7.78 (d, *J* = 8.3 Hz, 1H), 7.64 (d, *J* = 8.2 Hz, 2H), 7.56 – 7.50 (m, 1H), 7.48 (d, *J* = 8.1 Hz, 1H), 7.44 (s, 1H), 7.39 (d, *J* = 8.3 Hz, 2H), 7.08 (d, *J* = 8.3 Hz, 2H), 3.82 (s, 3H); <sup>13</sup>C NMR (101 MHz, DMSO-*d*<sub>6</sub>) δ 165.60, 158.48, 144.34, 136.86, 132.51, 131.89, 130.92, 130.77, 130.35, 130.03, 128.55, 126.47, 126.14, 125.26, 125.20, 125.13, 122.82, 119.33, 113.96, 55.18; HRMS [ESI]: calculated for C<sub>24</sub>H<sub>19</sub><sup>35</sup>ClNO<sub>3</sub><sup>+</sup> [M+H]<sup>+</sup>: 404.1048, found 404.1039, C<sub>24</sub>H<sub>19</sub><sup>37</sup>ClNO<sub>3</sub><sup>+</sup> [M+H]<sup>+</sup>: 406.1018, found 406.1004.

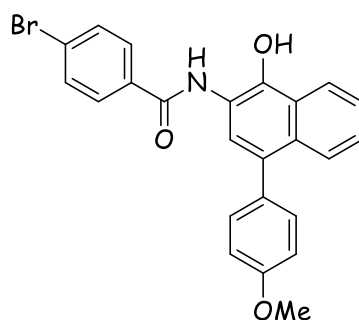

**4-bromo-*N*-(1-hydroxy-4-(4-methoxyphenyl)naphthalen-2-yl)benzamide (4h)**: Yield: 40%; brown oil;  $^1\text{H NMR}$  (400 MHz,  $\text{DMSO-}d_6$ )  $\delta$  10.47 (s, 1H), 9.87 (s, 1H), 8.34 (d,  $J = 8.2$  Hz, 1H), 8.04 (d,  $J = 8.4$  Hz, 2H), 7.78 (m, 3H), 7.56 – 7.46 (m, 2H), 7.44 (s, 1H), 7.39 (d,  $J = 8.5$  Hz, 2H), 7.08 (d,  $J = 8.3$  Hz, 2H), 3.83 (s, 3H);  $^{13}\text{C NMR}$  (101 MHz,  $\text{DMSO-}d_6$ )  $\delta$  166.09, 158.85, 144.76, 133.26, 132.26, 131.88, 131.31, 131.12, 130.73, 130.58, 126.82, 126.54, 126.21, 125.65, 125.52, 123.20, 119.67, 114.33, 55.56; HRMS [ESI]: calculated for  $\text{C}_{24}\text{H}_{19}^{79}\text{BrNO}_3^+$   $[\text{M}+\text{H}]^+$  : 448.0543, found 448.0531,  $\text{C}_{24}\text{H}_{19}^{81}\text{BrNO}_3^+$   $[\text{M}+\text{H}]^+$  : 450.0522, found 450.0513.

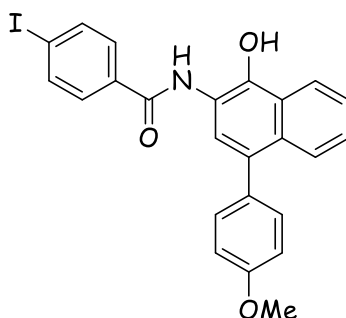

***N*-(1-hydroxy-4-(4-methoxyphenyl)naphthalen-2-yl)-4-iodobenzamide (4i)**: Yield: 38%; yellow oil;  $^1\text{H NMR}$  (400 MHz,  $\text{DMSO-}d_6$ )  $\delta$  10.42 (s, 1H), 9.84 (s, 1H), 8.30 (d,  $J = 8.2$  Hz, 1H), 7.92 (d,  $J = 8.2$  Hz, 2H), 7.83 (d,  $J = 8.3$  Hz, 2H), 7.74 (d,  $J = 8.3$  Hz, 1H), 7.51 – 7.42 (m, 2H), 7.40 (s, 1H), 7.35 (d,  $J = 8.4$  Hz, 2H), 7.04 (d,  $J = 8.4$  Hz, 2H), 3.79 (s, 3H);  $^{13}\text{C NMR}$  (101 MHz,  $\text{DMSO-}d_6$ )  $\delta$  166.38, 158.84, 144.68, 137.74, 133.51, 132.25, 131.31, 131.12, 130.70, 130.37, 126.84, 126.54, 125.66, 125.56, 125.51, 123.20, 119.71, 114.33, 100.33, 55.57; HRMS [ESI]: calculated for  $\text{C}_{24}\text{H}_{19}\text{INO}_3^+$   $[\text{M}+\text{H}]^+$  : 496.0404, found 496.0395.

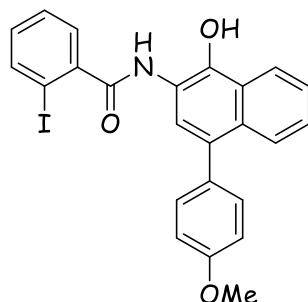

***N*-(1-hydroxy-4-(4-methoxyphenyl)naphthalen-2-yl)-2-iodobenzamide (4j)**: Yield: 43%; yellow oil;  $^1\text{H NMR}$  (400 MHz,  $\text{DMSO-}d_6$ )  $\delta$  10.68 (s, 1H), 9.92 (s, 1H), 8.35 (d,  $J = 8.3$  Hz, 1H), 7.98 (d,  $J = 7.9$  Hz, 1H), 7.78 (d,  $J = 8.3$  Hz, 1H), 7.71 (d,  $J = 7.5$  Hz, 1H), 7.58 – 7.52 (m, 2H), 7.49 (d,  $J = 8.2$  Hz, 1H), 7.46 (s, 1H), 7.39 (d,  $J = 8.3$  Hz, 2H), 7.27 (m, 1H), 7.09 (d,  $J = 8.3$  Hz, 2H), 3.83 (s, 3H);

$^{13}\text{C}$  NMR (101 MHz,  $\text{DMSO-}d_6$ )  $\delta$  169.48, 158.91, 143.70, 142.18, 139.57, 132.23, 131.89, 131.42, 131.33, 130.61, 129.05, 128.54, 126.95, 126.55, 125.80, 125.55, 124.25, 123.18, 119.88, 114.38, 94.57, 55.59; HRMS [ESI]: calculated for  $\text{C}_{24}\text{H}_{19}\text{INO}_3^+$   $[\text{M}+\text{H}]^+$  : 496.0404, found 496.0401.

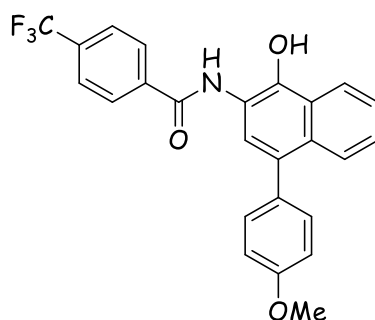

***N*-(1-hydroxy-4-(4-methoxyphenyl)naphthalen-2-yl)-4-(trifluoromethyl)benzamide (4k)**: Yield: 43%; brown solid;  $^1\text{H}$  NMR (400 MHz, acetone- $d_6$ )  $\delta$  10.34 (s, 1H), 9.90 (s,  $J = 8.3$  Hz, 1H), 8.46 (d,  $J = 8.3$  Hz, 1H), 8.36 (d,  $J = 8.1$  Hz, 2H), 7.92 (d,  $J = 8.2$  Hz, 2H), 7.83 (d,  $J = 8.4$  Hz, 1H), 7.57 – 7.52 (m, 1H), 7.47 (m, 1H), 7.43 (s, 1H), 7.39 (d,  $J = 8.4$  Hz, 2H), 7.06 (d,  $J = 8.4$  Hz, 2H), 3.86 (s, 3H);  $^{13}\text{C}$  NMR (101 MHz, acetone- $d_6$ )  $\delta$  167.10, 159.96, 144.85, 137.90, 133.06, 133.01, 132.01, 131.86, 129.73, 129.35 (q,  $J = 28.8$  Hz), 128.42, 127.03, 126.44 (q,  $J = 3.8$  Hz), 126.23, 126.20, 124.85 (q,  $J = 271.6$  Hz), 124.34, 123.98, 120.24, 114.61, 55.58;  $^{19}\text{F}$  NMR (376 MHz, acetone- $d_6$ )  $\delta$  -63.44; HRMS [ESI]: calculated for  $\text{C}_{25}\text{H}_{19}\text{F}_3\text{NO}_3^+$   $[\text{M}+\text{H}]^+$  : 438.1312, found 438.1310.

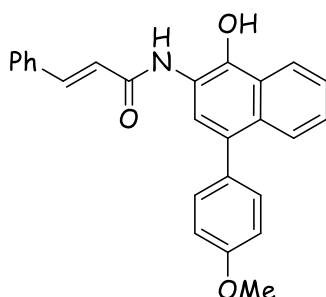

***N*-(1-hydroxy-4-(4-methoxyphenyl)naphthalen-2-yl)cinnamamide (4l)**: Yield: 34%; yellow oil;  $^1\text{H}$  NMR (400 MHz,  $\text{DMSO-}d_6$ )  $\delta$  10.70 (s, 1H), 10.65 (s, 1H), 8.33 (d,  $J = 8.2$  Hz, 1H), 7.78 – 7.66 (m, 4H), 7.55 – 7.50 (m, 1H), 7.46 (m, 3H), 7.44 – 7.35 (m, 4H), 7.07 (m, 3H), 3.83 (s, 3H);  $^{13}\text{C}$  NMR (101 MHz,  $\text{DMSO-}d_6$ )  $\delta$  165.66, 158.90, 143.10, 142.04, 134.85, 132.18, 131.49, 131.30, 130.60, 130.37, 129.51, 128.41, 127.13, 126.39, 125.79, 125.52, 123.32, 123.24, 120.87, 120.45, 114.35, 55.56; HRMS [ESI]: calculated for  $\text{C}_{26}\text{H}_{22}\text{NO}_3^+$   $[\text{M}+\text{H}]^+$  : 396.1594, found 396.1585.

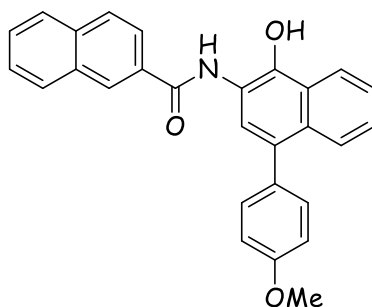

***N*-(1-hydroxy-4-(4-methoxyphenyl)naphthalen-2-yl)-2-naphthamide (4m)**: Yield: 44%; yellow oil; <sup>1</sup>H NMR (400 MHz, acetone-*d*<sub>6</sub>) δ 10.35 (s, 1H), 10.29 (s, *J* = 8.3 Hz, 1H), 8.78 (s, 1H), 8.50 (d, *J* = 8.3 Hz, 1H), 8.20 (m, 1H), 8.07 (m, 2H), 8.00 (d, *J* = 8.5 Hz, 1H), 7.84 (d, *J* = 8.4 Hz, 1H), 7.67 – 7.59 (m, 2H), 7.57 – 7.52 (m, 1H), 7.50 – 7.45 (m, 2H), 7.41 (d, *J* = 8.5 Hz, 2H), 7.10 – 7.04 (m, 2H), 3.87 (s, 3H); <sup>13</sup>C NMR (101 MHz, acetone-*d*<sub>6</sub>) δ 167.62, 159.06, 143.90, 135.12, 132.57, 132.29, 132.01, 131.02, 130.41, 129.12, 128.92, 128.42, 128.23, 127.77, 127.72, 126.99, 126.01, 125.29, 124.20, 123.49, 123.18, 119.79, 113.74, 54.73; HRMS [ESI]: calculated for C<sub>28</sub>H<sub>22</sub>NO<sub>3</sub><sup>+</sup> [M+H]<sup>+</sup> : 420.1594, found 420.1588.

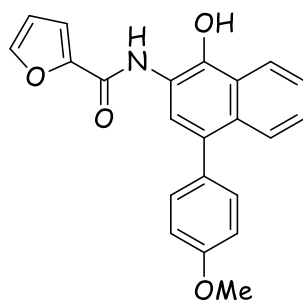

***N*-(1-hydroxy-4-(4-methoxyphenyl)naphthalen-2-yl)furan-2-carboxamide (4n)**: Yield: 43%; yellow solid; <sup>1</sup>H NMR (400 MHz, acetone-*d*<sub>6</sub>) δ 10.03 (s, *J* = 10.1 Hz, 1H), 10.01 (s, 1H), 8.44 (d, *J* = 8.3 Hz, 1H), 7.90 – 7.79 (m, 2H), 7.55 – 7.43 (m, 3H), 7.43 – 7.34 (m, 3H), 7.06 (d, *J* = 8.3 Hz, 2H), 6.72 (m, 1H), 3.85 (d, *J* = 13.2 Hz, 3H); <sup>13</sup>C NMR (101 MHz, acetone-*d*<sub>6</sub>) δ 159.93, 158.60, 147.78, 147.01, 144.24, 133.11, 133.02, 131.88, 131.78, 128.37, 128.30, 126.84, 126.18, 124.09, 123.86, 120.11, 117.17, 114.60, 113.44, 55.58; HRMS [ESI]: calculated for C<sub>22</sub>H<sub>18</sub>NO<sub>4</sub><sup>+</sup> [M+H]<sup>+</sup> : 360.1230, found 360.1218.

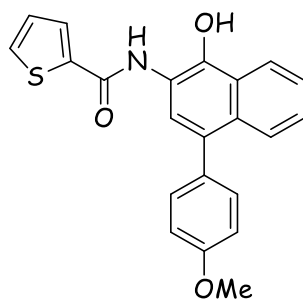

***N*-(1-hydroxy-4-(4-methoxyphenyl)naphthalen-2-yl)thiophene-2-carboxamide (4o)**: Yield: 43%; yellow oil; <sup>1</sup>H NMR (400 MHz, DMSO-*d*<sub>6</sub>) δ 10.40 (s, 1H), 9.87 (s, 1H), 8.37 – 8.31 (m, 1H), 8.13 (d, *J* = 3.0 Hz, 1H), 7.91 (m, 1H), 7.78 (d, *J* = 7.9 Hz, 1H), 7.50 (m, 2H), 7.42 (s, 1H), 7.39 (d, *J* = 8.7 Hz, 2H), 7.27 (m, 1H), 7.09 (d, *J* = 8.7 Hz, 2H), 3.83 (s, 3H); <sup>13</sup>C NMR (101 MHz, DMSO-*d*<sub>6</sub>) δ 161.14, 158.48, 144.17, 138.67, 132.38, 131.84, 130.90, 130.82, 130.27, 130.17, 128.31, 126.47, 126.10, 125.27, 125.12, 125.03, 122.76, 119.15, 113.95, 55.17; HRMS [ESI]: calculated for C<sub>22</sub>H<sub>18</sub>NO<sub>3</sub>S<sup>+</sup> [M+H]<sup>+</sup> : 376.1002, found 376.0992.

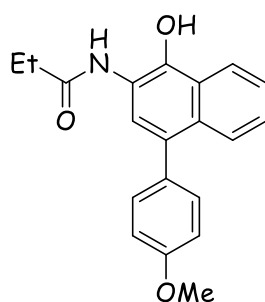

***N*-(1-hydroxy-4-(4-methoxyphenyl)naphthalen-2-yl)propionamide (4p)**: Yield: 53%; yellow oil;  $^1\text{H}$  NMR (400 MHz,  $\text{DMSO-}d_6$ )  $\delta$  10.32 (s, 1H), 10.26 (s, 1H), 8.28 (d,  $J = 8.3$  Hz, 1H), 7.73 (d,  $J = 8.4$  Hz, 1H), 7.53 – 7.46 (m, 1H), 7.46 – 7.39 (m, 1H), 7.36 (d,  $J = 8.1$  Hz, 2H), 7.27 (s, 1H), 7.07 (d,  $J = 8.2$  Hz, 2H), 3.82 (s, 3H), 2.51 (q,  $J = 7.5$  Hz, 3H), 1.16 (t,  $J = 7.5$  Hz, 3H);  $^{13}\text{C}$  NMR (101 MHz,  $\text{DMSO-}d_6$ )  $\delta$  174.43, 158.48, 142.54, 131.84, 130.91, 129.87, 126.70, 125.85, 125.30, 125.07, 123.33, 122.76, 119.92, 113.95, 55.19, 28.85, 9.92; HRMS [ESI]: calculated for  $\text{C}_{20}\text{H}_{20}\text{NO}_3^+$   $[\text{M}+\text{H}]^+$  : 322.1438, found 322.1431.

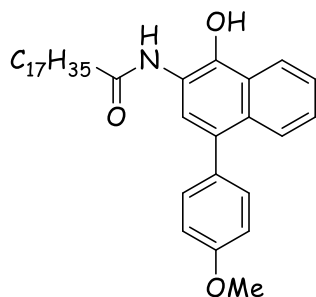

***N*-(1-hydroxy-4-(4-methoxyphenyl)naphthalen-2-yl)stearamide (4q)**: Yield: 42%; brown oil;  $^1\text{H}$  NMR (400 MHz,  $\text{DMSO-}d_6$ )  $\delta$  10.34 (s, 1H), 10.31 (s, 1H), 8.27 (d,  $J = 8.1$  Hz, 1H), 7.73 (d,  $J = 8.1$  Hz, 1H), 7.52 – 7.47 (m, 1H), 7.44 (d,  $J = 8.1$  Hz, 1H), 7.35 (d,  $J = 8.3$  Hz, 2H), 7.24 (s, 1H), 7.07 (d,  $J = 8.4$  Hz, 2H), 3.83 (s, 3H), 2.47 (m, 2H), 1.69 – 1.58 (m, 2H), 1.21 (m, 28H), 0.84 (t,  $J = 6.6$  Hz, 3H);  $^{13}\text{C}$  NMR (101 MHz,  $\text{DMSO-}d_6$ )  $\delta$  173.76, 158.47, 142.53, 131.82, 130.92, 130.86, 129.88, 126.75, 125.82, 125.26, 125.03, 123.16, 122.76, 119.89, 113.92, 55.17, 35.54, 31.35, 29.10, 29.07, 29.03, 28.95, 28.77, 28.56, 25.31, 22.15, 13.99; HRMS [ESI]: calculated for  $\text{C}_{35}\text{H}_{50}\text{NO}_3^+$   $[\text{M}+\text{H}]^+$  : 532.3785, found 532.3786.

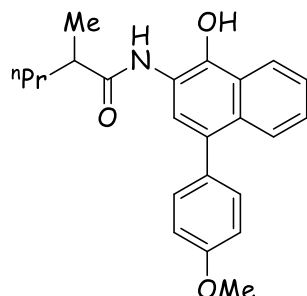

***N*-(1-hydroxy-4-(4-methoxyphenyl)naphthalen-2-yl)-2-methylpentanamide (4r)**: Yield: 50%; yellow oil;  $^1\text{H}$  NMR (400 MHz,  $\text{acetone-}d_6$ )  $\delta$  10.51 (s,  $J = 9.9$  Hz, 1H), 9.83 (s, 1H), 8.41 (d,  $J = 8.4$  Hz, 1H), 7.78 (d,  $J = 8.4$  Hz, 1H), 7.53 – 7.47 (m, 1H), 7.45 – 7.40 (m, 1H), 7.37 (t,  $J = 5.7$  Hz, 2H), 7.17 (s, 1H), 7.08 – 7.02 (m, 2H), 3.86 (s, 3H), 2.81 (m, 1H), 1.81 – 1.73 (m, 1H), 1.53 – 1.35 (m, 3H), 1.25



(d,  $J = 6.8$  Hz, 3H), 0.93 (t,  $J = 7.2$  Hz, 3H);  $^{13}\text{C}$  NMR (101 MHz, acetone- $d_6$ )  $\delta$  178.69, 159.89, 144.15, 133.12, 132.67, 131.82, 131.63, 128.54, 126.63, 126.07, 126.05, 123.94, 123.49, 120.50, 114.58, 55.57, 41.55, 37.37, 21.26, 18.41, 14.30; HRMS [ESI]: calculated for  $\text{C}_{23}\text{H}_{26}\text{NO}_3^+$   $[\text{M}+\text{H}]^+$  : 364.1907, found 364.1898.

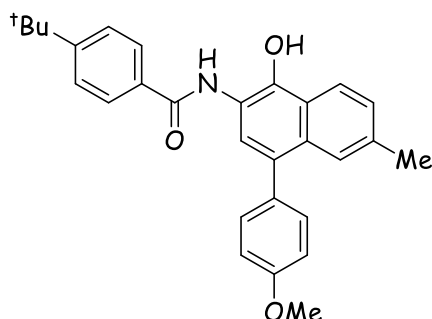

**4-(tert-butyl)-N-(1-hydroxy-4-(4-methoxyphenyl)-6-methylnaphthalen-2-yl)benzamide**

(4s): Yield: 48%; brown oil;  $^1\text{H}$  NMR (400 MHz, DMSO- $d_6$ )  $\delta$  10.42 (s, 1H), 10.00 (s, 1H), 8.25 (d,  $J = 8.5$  Hz, 1H), 8.03 (d,  $J = 8.1$  Hz, 2H), 7.60 – 7.53 (m, 3H), 7.43 – 7.33 (m, 4H), 7.12 – 7.05 (m, 2H), 3.83 (s, 3H), 2.39 (s, 3H), 1.32 (s, 9H);  $^{13}\text{C}$  NMR (101 MHz, DMSO- $d_6$ )  $\delta$  167.05, 158.80, 155.45, 144.23, 135.61, 132.47, 131.28, 131.08, 130.86, 130.62, 128.35, 127.74, 125.71, 125.24, 124.44, 123.24, 119.44, 114.32, 55.54, 35.18, 31.32, 21.92; HRMS [ESI]: calculated for  $\text{C}_{29}\text{H}_{30}\text{NO}_3^+$   $[\text{M}+\text{H}]^+$  : 440.2220, found 440.2220.

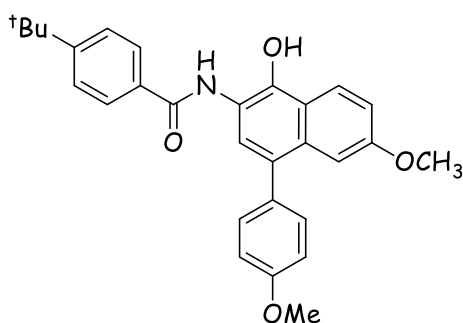

**4-(tert-butyl)-N-(1-hydroxy-6-methoxy-4-(4-methoxyphenyl)naphthalen-2-yl)benzamide**

(4t): Yield: 35%; brown oil;  $^1\text{H}$  NMR (400 MHz, DMSO- $d_6$ )  $\delta$  10.40 (s, 1H), 10.05 (s, 1H), 8.26 (d,  $J = 9.2$  Hz, 1H), 8.02 (d,  $J = 8.3$  Hz, 2H), 7.57 (d,  $J = 8.4$  Hz, 2H), 7.46 – 7.39 (m, 3H), 7.22 – 7.17 (m, 1H), 7.16 (d,  $J = 2.0$  Hz, 1H), 7.11 – 7.06 (m, 2H), 3.83 (s, 3H), 3.73 (s, 3H), 1.32 (s, 9H);  $^{13}\text{C}$  NMR (101 MHz, DMSO- $d_6$ )  $\delta$  167.02, 158.77, 157.91, 155.42, 144.58, 132.50, 131.94, 131.14, 131.09, 130.00, 128.34, 125.96, 125.69, 125.08, 122.13, 118.51, 117.36, 114.40, 104.62, 55.52, 55.31, 35.17, 31.32; HRMS [ESI]: calculated for  $\text{C}_{29}\text{H}_{30}\text{NO}_4^+$   $[\text{M}+\text{H}]^+$  : 456.2169, found 456.2168.

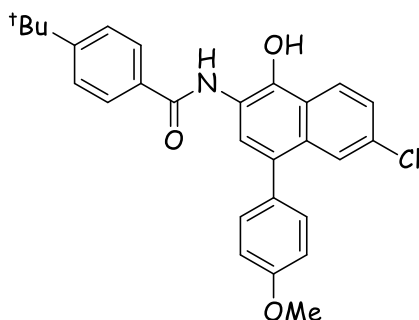

**4-(*tert*-butyl)-*N*-(6-chloro-1-hydroxy-4-(4-methoxyphenyl)naphthalen-2-yl)benzamide**

(4u): Yield: 58%; brown oil;  $^1\text{H}$  NMR (400 MHz, DMSO- $d_6$ )  $\delta$  10.46 (s, 1H), 10.26 (s, 1H), 8.35 (d,  $J$  = 9.0 Hz, 1H), 8.05 – 7.98 (m, 2H), 7.70 (d,  $J$  = 1.7 Hz, 1H), 7.60 – 7.55 (m, 3H), 7.54 – 7.50 (m, 1H), 7.41 – 7.36 (m, 2H), 7.13 – 7.07 (m, 2H), 3.83 (s, 3H), 1.31 (s, 9H);  $^{13}\text{C}$  NMR (101 MHz, DMSO- $d_6$ )  $\delta$  167.19, 159.07, 155.56, 144.32, 131.54, 131.43, 131.35, 131.26, 130.98, 130.45, 128.39, 126.59, 126.05, 125.70, 125.42, 124.08, 120.79, 114.51, 55.55, 35.16, 31.29; HRMS [ESI]: calculated for  $\text{C}_{28}\text{H}_{27}^{35}\text{ClNO}_3^+$  [M+H] $^+$ : 460.1674, found 460.1671,  $\text{C}_{28}\text{H}_{27}^{37}\text{ClNO}_3^+$  [M+H] $^+$ : 462.1644, found 462.1653.

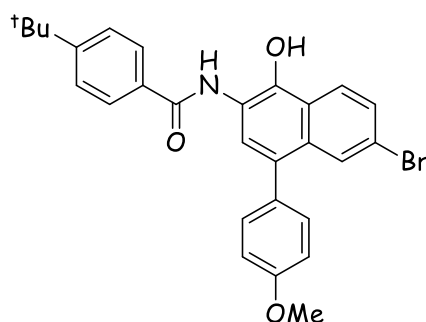

***N*-(6-bromo-1-hydroxy-4-(4-methoxyphenyl)naphthalen-2-yl)-4-(*tert*-butyl)benzamide**

(4v): Yield: 60%; brown oil;  $^1\text{H}$  NMR (400 MHz, DMSO- $d_6$ )  $\delta$  10.44 (s, 1H), 10.25 (s, 1H), 8.32 – 8.25 (m, 1H), 8.05 – 7.99 (m, 2H), 7.87 (d,  $J$  = 1.9 Hz, 1H), 7.64 (d,  $J$  = 9.0 Hz, 1H), 7.60 – 7.53 (m, 3H), 7.42 – 7.35 (m, 2H), 7.13 – 7.08 (m, 2H), 3.83 (s, 3H), 1.31 (s, 9H);  $^{13}\text{C}$  NMR (101 MHz, DMSO- $d_6$ )  $\delta$  167.18, 159.07, 155.56, 144.34, 131.78, 131.52, 131.26, 130.98, 130.40, 128.57, 128.39, 127.30, 126.52, 125.79, 125.70, 125.59, 120.87, 120.19, 114.51, 55.56, 35.16, 31.29; HRMS [ESI]: calculated for  $\text{C}_{28}\text{H}_{27}^{79}\text{BrNO}_3^+$  [M+H] $^+$ : 504.1169, found 504.1161,  $\text{C}_{28}\text{H}_{27}^{81}\text{BrNO}_3^+$  [M+H] $^+$ : 506.1148, found 506.1140.

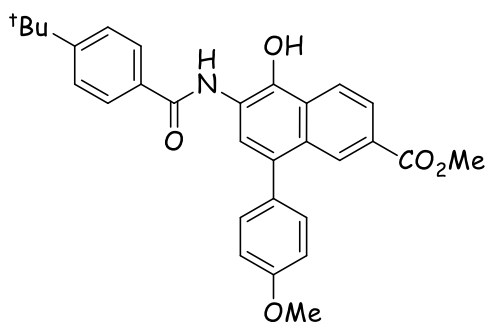

**methyl 6-(4-(*tert*-butyl)benzamido)-5-hydroxy-8-(4-methoxyphenyl)-2-naphthoate (4w):**

Yield: 23%; brown oil;  $^1\text{H}$  NMR (400 MHz, DMSO- $d_6$ )  $\delta$  10.47 (s, 1H), 10.22 (s, 1H), 8.49 – 8.39 (m, 2H), 8.01 (m, 3H), 7.63 – 7.56 (m, 3H), 7.42 (d,  $J$  = 8.5 Hz, 2H), 7.13 (d,  $J$  = 8.5 Hz, 2H), 3.85 (s, 3H), 3.84 (s, 3H), 1.33 (s, 9H);  $^{13}\text{C}$  NMR (101 MHz, DMSO- $d_6$ )  $\delta$  166.82, 166.40, 158.76, 155.26, 143.50, 132.21, 131.27, 131.00, 130.60, 129.20, 128.67, 128.03, 127.86, 126.71, 125.70, 125.36, 124.17, 123.54, 122.27, 114.14, 55.23, 52.29, 34.82, 30.93; HRMS [ESI]: calculated for  $\text{C}_{30}\text{H}_{30}\text{NO}_5^+$  [M+H] $^+$ : 484.2118, found 484.2116.

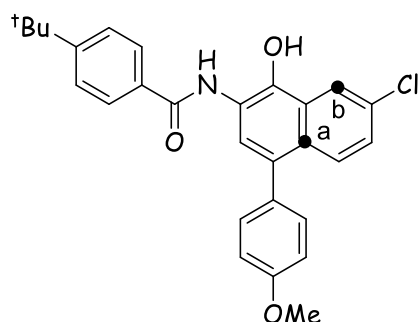

**4-(tert-butyl)-N-(7-chloro-1-hydroxy-4-(4-methoxyphenyl)naphthalen-2-yl)benzamide**

(4x): Yield: 60%; The ratio of the two diastereoisomers is 2.0:1; brown oil; <sup>1</sup>H NMR (400 MHz, DMSO-*d*<sub>6</sub>, a mixture of two isomers) δ 10.47 (s, major), 10.43 (s, minor), 10.30 (s, major + minor isomer), 8.39 (dd, *J* = 8.4, 1.2 Hz, major), 8.31 (s, minor), 8.30 (d, *J* = 2.2 Hz, minor), 8.02 (d, *J* = 8.4 Hz, major + minor isomer), 7.78 (d, *J* = 9.0 Hz, minor), 7.59 – 7.53 (m, major + minor isomer), 7.47 (dt, *J* = 4.3, 3.3 Hz, major + minor isomer), 7.38 (d, *J* = 8.6 Hz, minor), 7.20 (d, *J* = 8.6 Hz, major), 7.09 (d, *J* = 8.7 Hz, minor), 6.95 (d, *J* = 8.6 Hz, major), 3.83 (s, minor), 3.80 (s, major), 1.32 (s, minor), 1.32 (s, major); <sup>13</sup>C NMR (101 MHz, DMSO-*d*<sub>6</sub>) δ 166.88, 166.78, 158.65, 158.17, 155.25, 155.18, 143.91, 142.85, 134.92, 131.36, 130.94, 130.88, 130.60, 130.42, 130.31, 130.09, 129.88, 129.21, 129.01, 128.71, 128.48, 128.02, 127.99, 127.60, 127.48, 127.39, 126.87, 126.33, 125.40, 125.31, 125.15, 122.63, 121.47, 121.09, 119.95, 114.04, 112.78, 55.18, 55.05, 34.77, 30.89; HRMS [ESI]: calculated for C<sub>28</sub>H<sub>27</sub><sup>35</sup>ClNO<sub>3</sub><sup>+</sup> [M+H]<sup>+</sup> : 460.1674, found 460.1674, C<sub>28</sub>H<sub>27</sub><sup>37</sup>ClNO<sub>3</sub><sup>+</sup> [M+H]<sup>+</sup> : 462.1644, found 462.1633.

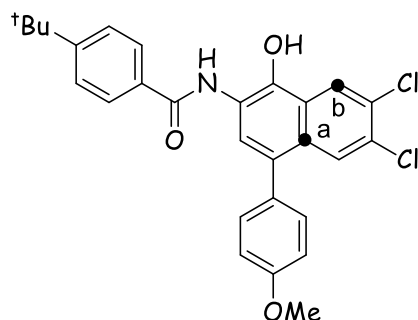

**4-(tert-butyl)-N-(6,7-dichloro-1-hydroxy-4-(4-methoxyphenyl)naphthalen-2-yl)benzamide (4y):**

Yield: 55%; The ratio of the two diastereoisomers is 3.0:1; brown oil; <sup>1</sup>H NMR (400 MHz, DMSO-*d*<sub>6</sub>, a mixture of two isomers) δ 10.48 (s, major), 10.43 (s, minor), 8.46 (s, minor), 8.36 (t, *J* = 8.4 Hz, major), 8.01 (d, *J* = 8.5 Hz, major + minor isomer), 7.86 (s, minor), 7.67 (d, *J* = 9.1 Hz, major), 7.60 (s, minor), 7.58 – 7.53 (m, major + minor isomer), 7.39 (d, *J* = 8.7 Hz, minor), 7.23 – 7.16 (m, major), 7.09 (d, *J* = 8.7 Hz, minor), 6.99 – 6.92 (m, major), 3.83 (s, minor), 3.80 (s, major), 1.31 (s, minor), 1.31 (s, major); <sup>13</sup>C NMR (101 MHz, DMSO-*d*<sub>6</sub>) δ 166.94, 166.82, 158.81, 158.23, 155.31, 155.24, 144.01, 142.84, 134.94, 131.95, 130.84, 130.75, 130.54, 130.43, 130.34, 130.02, 129.96, 129.25, 128.84, 128.26, 128.04, 128.00, 127.51, 127.21, 126.44, 125.86, 125.30, 124.29, 123.67, 121.43, 120.49, 114.19, 112.97, 55.17, 55.07, 34.76, 30.88; HRMS [ESI]: calculated for C<sub>28</sub>H<sub>26</sub><sup>35</sup>Cl<sub>2</sub>NO<sub>3</sub><sup>+</sup> [M+H]<sup>+</sup> : 494.1284, found 494.1270, C<sub>28</sub>H<sub>26</sub><sup>35</sup>Cl<sup>37</sup>ClNO<sub>3</sub><sup>+</sup> [M+H]<sup>+</sup> : 496.1255, found 496.1260, C<sub>28</sub>H<sub>26</sub><sup>37</sup>Cl<sub>2</sub>NO<sub>3</sub><sup>+</sup> [M+H]<sup>+</sup> : 498.1225, found 498.1224.

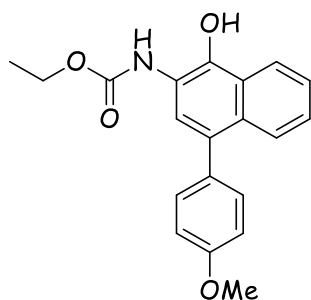

**ethyl (1-hydroxy-4-(4-methoxyphenyl)naphthalen-2-yl)carbamate (4z)** : Yield: 27%; yellow oil; <sup>1</sup>H NMR (400 MHz, DMSO-*d*<sub>6</sub>) δ 9.52 (s, 1H), 9.03 (s, 1H), 8.24 (d, *J* = 8.4 Hz, 1H), 7.72 (d, *J* = 8.4 Hz, 1H), 7.51 – 7.45 (m, 1H), 7.44 – 7.39 (m, 2H), 7.34 (d, *J* = 8.5 Hz, 2H), 7.06 (d, *J* = 8.6 Hz, 2H), 4.15 (q, *J* = 7.1 Hz, 2H), 3.82 (s, 3H), 1.28 (t, *J* = 6.6 Hz, 3H); <sup>13</sup>C NMR (101 MHz, DMSO-*d*<sub>6</sub>) δ 158.45, 155.05, 132.09, 130.94, 130.88, 130.78, 129.45, 128.89, 126.08, 125.52, 125.15, 124.12, 122.42, 119.81, 113.96, 60.85, 55.21, 14.59; HRMS [ESI]: calculated for C<sub>20</sub>H<sub>20</sub>NO<sub>4</sub><sup>+</sup> [M+H]<sup>+</sup> : 338.1387, found 338.1386.

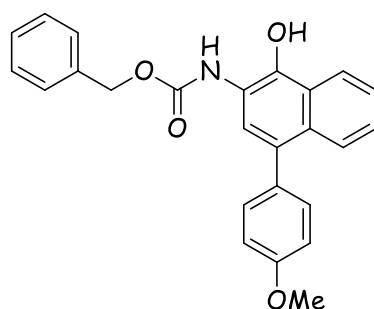

**benzyl (1-hydroxy-4-(4-methoxyphenyl)naphthalen-2-yl)carbamate (4aa)** : Yield: 36%; yellow oil; <sup>1</sup>H NMR (400 MHz, DMSO-*d*<sub>6</sub>) δ 9.54 (s, 1H), 9.15 (s, 1H), 8.25 (d, *J* = 8.4 Hz, 1H), 7.73 (d, *J* = 8.4 Hz, 1H), 7.49 (d, *J* = 7.2 Hz, 1H), 7.46 (s, 1H), 7.43 (d, *J* = 3.9 Hz, 2H), 7.40 (d, *J* = 5.7 Hz, 2H), 7.38 – 7.31 (m, 4H), 7.06 (d, *J* = 8.4 Hz, 2H), 5.18 (s, 2H), 3.82 (s, 3H); <sup>13</sup>C NMR (101 MHz, DMSO-*d*<sub>6</sub>) δ 158.45, 154.81, 136.60, 132.08, 130.92, 130.78, 129.53, 128.48, 128.08, 127.91, 126.67, 126.46, 126.04, 125.84, 125.56, 125.15, 122.42, 113.95, 66.29, 55.21; HRMS [ESI]: calculated for C<sub>25</sub>H<sub>22</sub>NO<sub>4</sub><sup>+</sup> [M+H]<sup>+</sup> : 400.1543, found 400.1537.

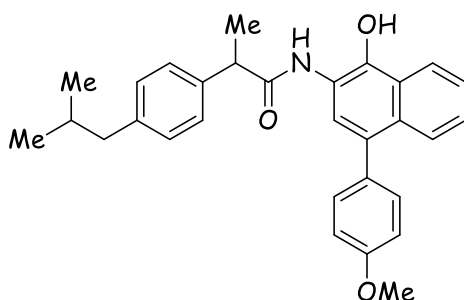

**N-(1-hydroxy-4-(4-methoxyphenyl)naphthalen-2-yl)-2-(4-isobutylphenyl)propanamide (5a)**: Yield: 62%; yellow oil; <sup>1</sup>H NMR (400 MHz, DMSO-*d*<sub>6</sub>) δ 10.36 (s, 1H), 10.15 (s, 1H), 8.26 (d, *J* = 8.4 Hz, 1H), 7.71 (d, *J* = 8.3 Hz, 1H), 7.49 (m, 1H), 7.45 – 7.39 (m, 1H), 7.39 – 7.27 (m, 5H), 7.14 (d, *J* = 8.0 Hz, 2H), 7.10 – 7.03 (m, 2H), 4.04 (q, *J* = 6.7 Hz, 1H), 3.82 (s, 3H), 2.41 (d, *J* = 7.1 Hz, 2H), 1.80 (tt, *J* = 13.4, 6.6 Hz, 1H), 1.48 (d, *J* = 7.0 Hz, 3H), 0.84 (d, *J* = 6.6 Hz, 6H); <sup>13</sup>C NMR (101 MHz,

DMSO-*d*<sub>6</sub>)  $\delta$  174.55, 158.47, 142.30, 139.80, 138.64, 131.79, 131.03, 130.86, 129.80, 129.09, 127.09, 126.57, 125.84, 125.32, 125.08, 123.09, 122.65, 120.01, 113.92, 55.17, 44.90, 44.25, 29.64, 22.21, 18.61; HRMS [ESI]: calculated for C<sub>30</sub>H<sub>32</sub>NO<sub>3</sub><sup>+</sup> [M+H]<sup>+</sup> : 454.2377, found 454.2372.

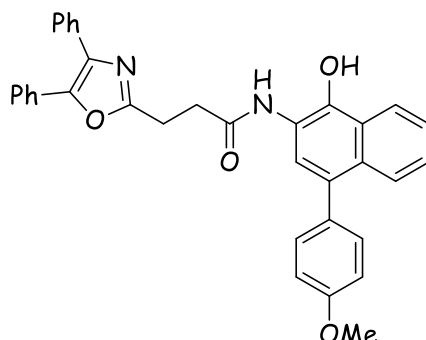

**3-(4,5-diphenyloxazol-2-yl)-N-(1-hydroxy-4-(4-methoxyphenyl)naphthalen-2-yl)propanamide (5b)**: Yield: 60%; brown oil; <sup>1</sup>H NMR (400 MHz, DMSO-*d*<sub>6</sub>)  $\delta$  10.40 (s, 1H), 10.11 (s, 1H), 8.31 (d, *J* = 8.9 Hz, 1H), 7.75 (d, *J* = 8.4 Hz, 1H), 7.56 (m, 2H), 7.51 (m, 2H), 7.44 (m, 1H), 7.40 – 7.30 (m, 10H), 7.08 – 7.03 (m, 2H), 3.82 (s, 3H), 3.25 (t, *J* = 7.1 Hz, 2H), 3.08 (t, *J* = 7.1 Hz, 2H); <sup>13</sup>C NMR (101 MHz, DMSO-*d*<sub>6</sub>)  $\delta$  172.20, 162.83, 158.86, 145.09, 143.27, 134.79, 132.42, 132.25, 131.29, 131.25, 130.32, 129.30, 129.19, 129.02, 128.82, 128.56, 127.77, 126.94, 126.72, 126.24, 125.65, 125.47, 124.05, 123.11, 120.15, 114.31, 55.56, 32.59, 23.79; HRMS [ESI]: calculated for C<sub>35</sub>H<sub>29</sub>N<sub>2</sub>O<sub>4</sub><sup>+</sup> [M+H]<sup>+</sup> : 541.2122, found 541.2122.

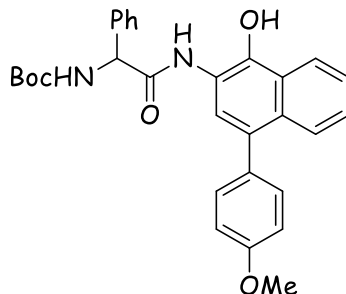

**tert-butyl(2-((1-hydroxy-4-(4-methoxyphenyl)naphthalen-2-yl)amino)-2-oxo-1-phenylethyl)carbamate (5c)**: Yield: 35%; yellow oil; <sup>1</sup>H NMR (400 MHz, DMSO-*d*<sub>6</sub>)  $\delta$  10.36 (s, 1H), 9.92 (s, 1H), 8.27 (d, *J* = 8.3 Hz, 1H), 7.72 (d, *J* = 8.2 Hz, 2H), 7.56 (d, *J* = 7.3 Hz, 2H), 7.49 (d, *J* = 7.3 Hz, 1H), 7.41 (m, 2H), 7.37 (d, *J* = 7.7 Hz, 2H), 7.33 (m, 3H), 7.06 (d, *J* = 8.6 Hz, 2H), 5.56 (d, *J* = 7.3 Hz, 1H), 3.82 (s, 3H), 1.41 (s, 9H); <sup>13</sup>C NMR (101 MHz, DMSO-*d*<sub>6</sub>)  $\delta$  171.10, 158.87, 155.63, 142.68, 138.23, 132.21, 131.50, 131.25, 130.16, 128.89, 128.36, 128.00, 126.68, 126.24, 125.73, 125.58, 123.34, 122.96, 120.28, 114.31, 79.06, 58.37, 55.55, 28.59; HRMS [ESI]: calculated for C<sub>30</sub>H<sub>31</sub>N<sub>2</sub>O<sub>5</sub><sup>+</sup> [M+H]<sup>+</sup> : 499.2227, found 499.2221.

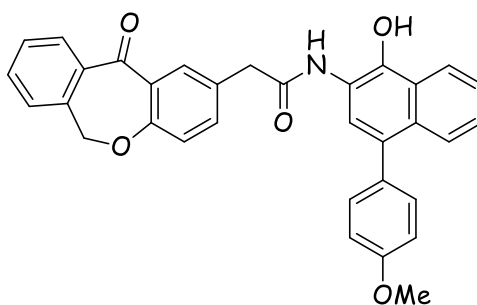

***N*-(1-hydroxy-4-(4-methoxyphenyl)naphthalen-2-yl)-2-(11-oxo-6,11-dihydrodibenzo[*b,e*]oxepin-2-yl)acetamide (5d)**: Yield: 44%; yellow oil; <sup>1</sup>H NMR (400 MHz, DMSO-*d*<sub>6</sub>) δ 10.47 (s, 1H), 10.12 (s, 1H), 8.28 (d, *J* = 8.4 Hz, 1H), 8.15 (d, *J* = 2.0 Hz, 1H), 7.76 (m, 2H), 7.68 – 7.61 (m, 2H), 7.58 – 7.52 (m, 2H), 7.49 (d, *J* = 8.2 Hz, 1H), 7.46 – 7.40 (m, 1H), 7.36 (m, 3H), 7.11 (d, *J* = 8.4 Hz, 1H), 7.07 (d, *J* = 8.4 Hz, 2H), 5.30 (s, 2H), 3.88 (s, 2H), 3.82 (s, 3H); <sup>13</sup>C NMR (101 MHz, DMSO-*d*<sub>6</sub>) δ 190.58, 171.51, 160.31, 158.86, 143.03, 140.35, 137.17, 136.32, 133.48, 132.22, 132.12, 131.37, 131.28, 130.26, 129.77, 129.58, 129.22, 128.70, 126.89, 126.27, 125.69, 125.51, 125.00, 123.79, 123.08, 121.21, 120.32, 114.32, 73.17, 55.55, 41.65; HRMS [ESI]: calculated for C<sub>33</sub>H<sub>26</sub>NO<sub>5</sub><sup>+</sup> [M+H]<sup>+</sup> : 516.1805, found 516.1802.

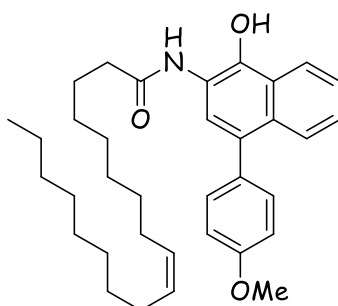

***N*-(1-hydroxy-4-(4-methoxyphenyl)naphthalen-2-yl)oleamide (5e)**: Yield: 33%; yellow oil; <sup>1</sup>H NMR (400 MHz, DMSO-*d*<sub>6</sub>) δ 10.34 (s, 1H), 10.32 (s, 1H), 8.28 (d, *J* = 8.2 Hz, 1H), 7.73 (d, *J* = 8.3 Hz, 1H), 7.53 – 7.46 (m, 1H), 7.46 – 7.40 (m, 1H), 7.35 (d, *J* = 8.4 Hz, 2H), 7.24 (s, 1H), 7.07 (d, *J* = 8.3 Hz, 2H), 5.31 (m, 2H), 3.82 (s, 3H), 2.47 (m, 2H), 1.99 (m, 2H), 1.64 (m, 2H), 1.40 – 1.09 (m, 22H), 0.86 – 0.77 (m, 3H); <sup>13</sup>C NMR (101 MHz, DMSO-*d*<sub>6</sub>) δ 173.74, 158.48, 142.54, 131.82, 130.93, 130.88, 129.88, 129.63, 126.75, 125.85, 125.28, 125.05, 123.18, 122.76, 119.90, 115.78, 113.93, 55.18, 35.54, 31.33, 29.13, 29.10, 29.06, 28.95, 28.88, 28.75, 28.63, 28.60, 28.54, 26.61, 25.32, 22.14, 13.99; HRMS [ESI]: calculated for C<sub>35</sub>H<sub>48</sub>NO<sub>3</sub><sup>+</sup> [M+H]<sup>+</sup> : 530.3629, found 530.3628.

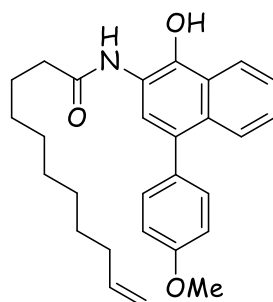

***N*-(1-hydroxy-4-(4-methoxyphenyl)naphthalen-2-yl)undec-10-enamide (5f)**: Yield: 32%; yellow oil;  $^1\text{H NMR}$  (400 MHz,  $\text{DMSO-}d_6$ )  $\delta$  10.38 (s, 1H), 10.35 (s, 1H), 8.32 (d,  $J = 8.4$  Hz, 1H), 7.77 (d,  $J = 8.3$  Hz, 1H), 7.56 – 7.50 (m, 2H), 7.42 – 7.37 (m, 2H), 7.28 (s, 1H), 7.14 – 7.08 (m, 2H), 5.84 – 5.78 (m, 1H), 5.03 (m, 1H), 4.94 (m, 1H), 3.86 (s, 3H), 2.53 (t,  $J = 7.1$  Hz, 2H), 2.05 – 2.01 (m, 2H), 1.73 – 1.65 (m, 2H), 1.35 – 1.23 (m, 10H);  $^{13}\text{C NMR}$  (101 MHz,  $\text{DMSO-}d_6$ )  $\delta$  173.77, 158.48, 142.54, 138.84, 131.82, 130.88, 129.89, 129.30, 128.60, 125.84, 125.29, 125.05, 123.19, 122.76, 119.90, 114.66, 113.93, 55.17, 35.55, 33.24, 28.79, 28.74, 28.58, 28.53, 28.30, 25.32; HRMS [ESI]: calculated for  $\text{C}_{28}\text{H}_{34}\text{NO}_3^+$   $[\text{M}+\text{H}]^+$  : 432.2533, found 432.2527.

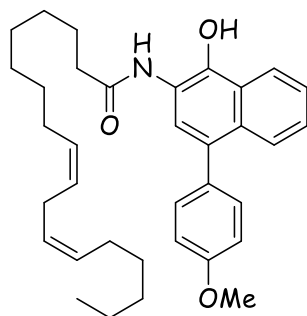

**(9*Z*,12*Z*)-*N*-(1-hydroxy-4-(4-methoxyphenyl)naphthalen-2-yl)octadeca-9,12-dienamide (5g)**: Yield: 22%; yellow oil;  $^1\text{H NMR}$  (400 MHz,  $\text{DMSO-}d_6$ )  $\delta$  10.36 (d,  $J = 12.8$  Hz, 2H), 8.32 (d,  $J = 8.4$  Hz, 1H), 7.76 (d,  $J = 8.3$  Hz, 1H), 7.54 – 7.50 (m, 1H), 7.47 (m, 1H), 7.39 (m, 2H), 7.28 (s, 1H), 7.13 – 7.07 (m, 2H), 5.43 – 5.28 (m, 4H), 3.86 (s, 3H), 2.76 (t,  $J = 6.1$  Hz, 2H), 2.55 – 2.49 (m, 2H), 2.05 – 1.99 (m, 4H), 1.73 – 1.65 (m, 2H), 1.36 (m, 14H), 0.86 (t,  $J = 6.6$  Hz, 3H);  $^{13}\text{C NMR}$  (101 MHz,  $\text{DMSO-}d_6$ )  $\delta$  173.74, 158.47, 142.53, 131.81, 130.92, 130.87, 129.88, 129.74, 129.72, 127.79, 127.75, 126.74, 125.84, 125.28, 125.04, 123.17, 122.75, 119.89, 113.93, 55.17, 40.15, 35.55, 30.93, 29.06, 28.77, 28.58, 26.64, 25.25, 22.02, 13.96; HRMS [ESI]: calculated for  $\text{C}_{35}\text{H}_{46}\text{NO}_3^+$   $[\text{M}+\text{H}]^+$  : 528.3472, found 528.3468.

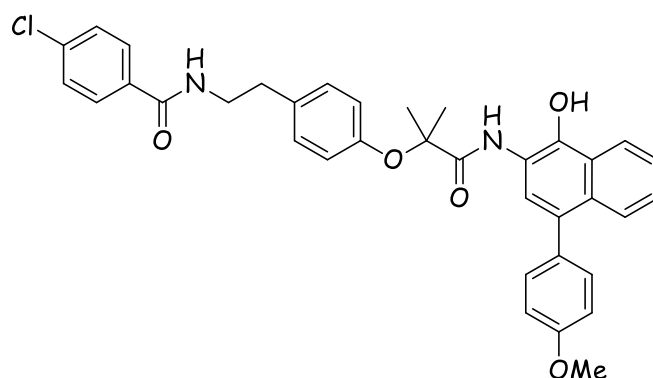

**4-chloro-*N*-(4-((1-hydroxy-4-(4-methoxyphenyl)naphthalen-2-yl)amino)-2-methyl-1-oxopropan-2-yl)oxy)phenethyl)benzamide (5h)**: Yield: 38%; brown oil;  $^1\text{H NMR}$  (400 MHz,  $\text{DMSO-}d_6$ )  $\delta$  10.01 (s, 1H), 9.78 (s, 1H), 8.66 (m, 1H), 8.28 (d,  $J = 8.4$  Hz, 1H), 7.85 – 7.81 (m, 3H), 7.76 (d,  $J = 8.4$  Hz, 1H), 7.51 (m, 3H), 7.45 – 7.40 (m, 1H), 7.36 (d,  $J = 8.4$  Hz, 2H), 7.20 (d,  $J = 8.4$  Hz, 2H), 7.08 (d,  $J = 8.4$  Hz, 2H), 6.99 (d,  $J = 8.3$  Hz, 2H), 3.82 (s, 3H), 3.46 (m, 2H), 2.80 (t,  $J = 7.4$  Hz, 2H), 1.56 (s, 6H);  $^{13}\text{C NMR}$  (101 MHz,  $\text{DMSO-}d_6$ )  $\delta$  173.52, 165.12, 158.49, 152.59, 141.62, 135.94, 134.18, 133.33, 132.07, 131.23, 130.94, 129.61, 129.42, 129.08, 128.37, 126.14, 125.64, 125.32, 122.64, 122.42,

120.87, 120.81, 113.94, 80.99, 55.18, 40.98, 34.30, 25.01; HRMS [ESI]: calculated for  $C_{36}H_{34}^{35}ClN_2O_5^+$   $[M+H]^+$  : 609.2151, found 609.2145,  $C_{36}H_{34}^{37}ClN_2O_5^+$   $[M+H]^+$  : 611.2121, found 611.2120.

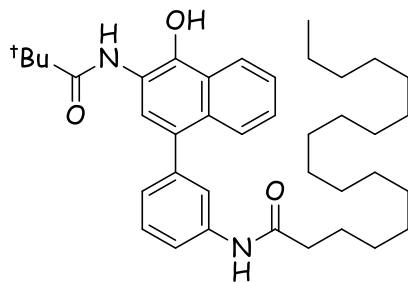

**N-(3-(4-hydroxy-3-pivalamidonaphthalen-1-yl)phenyl)stearamide (5i)**: Yield: 37%; yellow oil;  $^1H$  NMR (400 MHz, DMSO- $d_6$ )  $\delta$  9.98 (s, 1H), 9.88 (s, 1H), 9.57 (s, 1H), 8.30 (d,  $J$  = 8.3 Hz, 1H), 7.95 (d,  $J$  = 8.1 Hz, 1H), 7.77 (m, 2H), 7.63 (m, 1H), 7.51 (m, 1H), 7.47 – 7.43 (m, 1H), 7.42 (s, 1H), 7.10 (d,  $J$  = 7.6 Hz, 1H), 2.30 (t,  $J$  = 7.3 Hz, 2H), 1.61 – 1.54 (m, 2H), 1.30 (s, 9H), 1.23 – 1.19 (m, 28H), 0.84 (t,  $J$  = 6.6 Hz, 3H);  $^{13}C$  NMR (101 MHz, DMSO- $d_6$ )  $\delta$  178.86, 171.43, 143.22, 140.10, 139.47, 131.04, 129.62, 128.69, 126.63, 125.91, 125.28, 124.99, 124.44, 124.21, 122.69, 120.38, 120.18, 117.76, 36.47, 31.30, 29.03, 28.93, 28.80, 28.72, 27.36, 25.10, 22.11, 13.95; HRMS [ESI]: calculated for  $C_{39}H_{57}N_2O_3^+$   $[M+H]^+$  : 601.4364, found 601.4369.

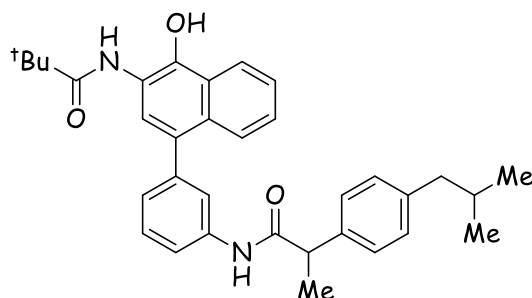

**N-(1-hydroxy-4-(3-(2-(4-isobutylphenyl)propanamido)phenyl)naphthalen-2-yl)pivalamide (5j)**: Yield: 47%; yellow solid;  $^1H$  NMR (400 MHz, DMSO- $d_6$ )  $\delta$  10.16 (s, 1H), 9.89 (s, 1H), 9.56 (s, 1H), 8.30 (d,  $J$  = 7.8 Hz, 1H), 7.76 (m, 2H), 7.66 – 7.62 (m, 1H), 7.54 – 7.49 (m, 1H), 7.47 – 7.43 (m, 1H), 7.43 – 7.38 (m, 2H), 7.30 (d,  $J$  = 8.1 Hz, 2H), 7.13 – 7.07 (m, 3H), 3.81 (q,  $J$  = 6.9 Hz, 1H), 2.39 (d,  $J$  = 7.1 Hz, 2H), 1.85 – 1.72 (m, 1H), 1.41 (d,  $J$  = 7.0 Hz, 3H), 1.31 (s, 9H), 0.84 (d,  $J$  = 6.6 Hz, 6H);  $^{13}C$  NMR (101 MHz, DMSO- $d_6$ )  $\delta$  178.93, 172.57, 143.26, 140.15, 139.57, 139.45, 139.10, 138.51, 130.98, 129.61, 128.98, 128.68, 127.14, 127.04, 126.63, 126.02, 125.35, 124.72, 124.25, 122.72, 120.44, 120.17, 45.69, 44.27, 29.68, 27.39, 26.71, 22.23, 18.69; HRMS [ESI]: calculated for  $C_{34}H_{39}N_2O_3^+$   $[M+H]^+$  : 523.2955, found 523.2953.



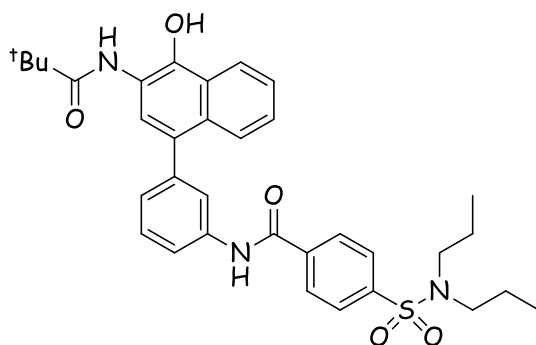

**4-(*N,N*-dipropylsulfamoyl)-*N*-(3-(4-hydroxy-3-pivalamidonaphthalen-1-yl)phenyl)benzamide (5k)**: Yield: 45%; brown oil;  $^1\text{H NMR}$  (400 MHz,  $\text{DMSO-}d_6$ )  $\delta$  10.61 (s, 1H), 9.91 (s, 1H), 9.59 (s, 1H), 8.32 (d,  $J = 8.2$  Hz, 1H), 8.14 (d,  $J = 8.4$  Hz, 2H), 8.00 – 7.92 (m, 3H), 7.90 – 7.80 (m, 2H), 7.59 – 7.45 (m, 4H), 7.22 (d,  $J = 7.5$  Hz, 1H), 3.11 – 3.01 (m, 4H), 1.54 – 1.39 (m, 4H), 1.32 (s, 9H), 0.81 (m, 6H);  $^{13}\text{C NMR}$  (101 MHz,  $\text{DMSO-}d_6$ )  $\delta$  178.91, 164.58, 143.37, 141.99, 140.15, 139.01, 138.49, 130.88, 129.61, 128.87, 128.78, 127.79, 126.93, 126.65, 126.08, 125.40, 125.00, 124.43, 122.75, 121.71, 120.22, 119.10, 49.70, 39.10, 27.40, 21.69, 11.04; HRMS [ESI]: calculated for  $\text{C}_{34}\text{H}_{40}\text{N}_3\text{O}_5\text{S}^+$   $[\text{M}+\text{H}]^+$  : 602.2683, found 602.2679.

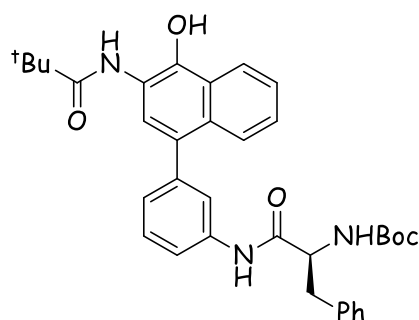

**(*S*)-*tert*-butyl(1-((3-(4-hydroxy-3-pivalamidonaphthalen-1-yl)phenyl)amino)-1-oxo-3-phenylpropan-2-yl)carbamate (5l)**: Yield: 42%; yellow oil;  $^1\text{H NMR}$  (400 MHz,  $\text{DMSO-}d_6$ )  $\delta$  10.19 (s, 1H), 9.91 (s, 1H), 9.60 (s, 1H), 8.31 (d,  $J = 8.0$  Hz, 1H), 7.78 (d,  $J = 8.4$  Hz, 1H), 7.73 (s, 1H), 7.66 (d,  $J = 8.1$  Hz, 1H), 7.55 – 7.51 (m, 1H), 7.50 – 7.45 (m, 2H), 7.44 (s, 1H), 7.33 (d,  $J = 7.3$  Hz, 2H), 7.28 (t,  $J = 7.3$  Hz, 2H), 7.22 – 7.17 (m, 1H), 7.15 (d,  $J = 8.6$  Hz, 1H), 6.72 (brs, 1H), 4.38 – 4.30 (m, 1H), 3.05 – 3.97 (m, 1H), 2.89 – 2.80 (m, 1H), 1.32 (s, 9H), 1.30 (s, 9H);  $^{13}\text{C NMR}$  (101 MHz,  $\text{DMSO-}d_6$ )  $\delta$  178.94, 171.04, 155.47, 143.32, 140.16, 139.07, 138.00, 130.94, 129.61, 129.29, 128.88, 128.09, 126.65, 126.34, 126.04, 125.40, 125.00, 124.85, 124.33, 122.75, 120.60, 120.19, 118.05, 78.14, 56.69, 39.14, 28.20, 27.40, 26.79; HRMS [ESI]: calculated for  $\text{C}_{34}\text{H}_{40}\text{N}_3\text{O}_5^+$   $[\text{M}+\text{H}]^+$  : 582.2962, found 582.2955.

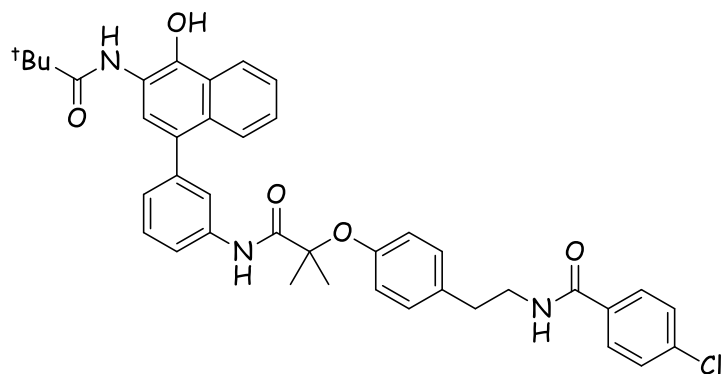

**4-chloro-N-(4-((1-((3-(4-hydroxy-3-pivalamidonaphthalen-1-yl)phenyl)amino)-2-methyl-1-oxopropan-2-yl)oxy)phenethyl)benzamide (5m):** Yield: 39%; brown oil;  $^1\text{H}$  NMR (400 MHz,  $\text{DMSO-}d_6$ )  $\delta$  10.12 (s, 1H), 9.88 (s, 1H), 9.57 (s, 1H), 8.62 (m, 1H), 8.33 – 8.28 (m, 1H), 7.85 (d,  $J = 1.6$  Hz, 1H), 7.83 – 7.78 (m, 3H), 7.76 – 7.73 (m, 1H), 7.53 – 7.49 (m, 3H), 7.48 – 7.45 (m, 1H), 7.43 (d,  $J = 6.6$  Hz, 2H), 7.16 (d,  $J = 8.7$  Hz, 3H), 6.88 (d,  $J = 8.5$  Hz, 2H), 3.43 (dd,  $J = 14.1, 6.4$  Hz, 2H), 2.77 (t,  $J = 7.4$  Hz, 2H), 1.52 (s, 6H), 1.31 (s, 9H);  $^{13}\text{C}$  NMR (101 MHz,  $\text{DMSO-}d_6$ )  $\delta$  178.89, 172.87, 165.05, 153.05, 143.26, 139.98, 138.73, 135.89, 133.44, 133.31, 130.93, 129.59, 129.50, 129.04, 128.58, 128.34, 126.63, 125.99, 125.32, 125.21, 125.01, 124.32, 122.70, 121.69, 120.18, 119.80, 119.11, 80.47, 40.93, 34.22, 31.17, 27.38, 24.86; HRMS [ESI]: calculated for  $\text{C}_{40}\text{H}_{41}^{35}\text{ClN}_3\text{O}_5^+$   $[\text{M}+\text{H}]^+$  : 678.2729, found 678.2717,  $\text{C}_{40}\text{H}_{41}^{37}\text{ClN}_3\text{O}_5^+$   $[\text{M}+\text{H}]^+$  : 680.2700, found 680.2706.

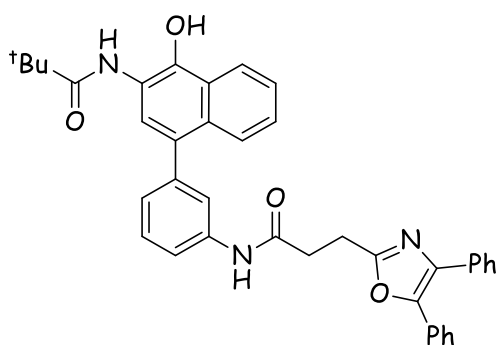

**N-(4-(3-(3-(4,5-diphenyloxazol-2-yl)propanamido)phenyl)-1-hydroxynaphthalen-2-yl)pivalamide (5n):** Yield: 31%; yellow oil;  $^1\text{H}$  NMR (400 MHz,  $\text{DMSO-}d_6$ )  $\delta$  10.24 (s, 1H), 9.88 (s, 1H), 9.56 (s, 1H), 8.34 – 8.27 (m, 1H), 7.77 (m, 2H), 7.68 – 7.62 (m, 1H), 7.57 – 7.54 (m, 2H), 7.53 – 7.51 (m, 1H), 7.51 – 7.49 (m, 1H), 7.47 – 7.33 (m, 10H), 7.13 (d,  $J = 7.6$  Hz, 1H), 3.17 (t,  $J = 7.2$  Hz, 2H), 2.93 (t,  $J = 7.2$  Hz, 2H), 1.31 (s, 9H);  $^{13}\text{C}$  NMR (101 MHz,  $\text{DMSO-}d_6$ )  $\delta$  178.92, 169.81, 162.66, 144.62, 143.27, 140.19, 139.31, 134.37, 132.04, 131.01, 129.64, 129.29, 128.94, 128.81, 128.66, 128.45, 128.18, 127.37, 126.64, 126.32, 125.97, 125.33, 124.98, 124.66, 124.26, 122.70, 120.44, 120.18, 117.83, 39.12, 32.75, 27.37, 23.12; HRMS [ESI]: calculated for  $\text{C}_{39}\text{H}_{36}\text{N}_3\text{O}_4^+$   $[\text{M}+\text{H}]^+$  : 610.2700, found 610.2690.

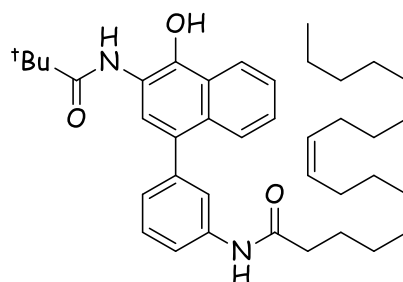

***N*-(3-(4-hydroxy-3-pivalamidonaphthalen-1-yl)phenyl)oleamide (50)**: Yield: 23%; yellow oil;  $^1\text{H}$  NMR (400 MHz,  $\text{DMSO-}d_6$ )  $\delta$  9.99 (s, 1H), 9.89 (s, 1H), 9.58 (s, 1H), 8.30 (d,  $J = 8.4$  Hz, 1H), 7.76 (d,  $J = 9.1$  Hz, 2H), 7.63 (d,  $J = 7.7$  Hz, 1H), 7.54 – 7.48 (m, 1H), 7.48 – 7.36 (m, 3H), 7.10 (d,  $J = 7.6$  Hz, 1H), 5.35 – 5.25 (m, 2H), 2.30 (t,  $J = 7.3$  Hz, 2H), 2.00 – 1.93 (m, 2H), 1.60 – 1.45 (m, 4H), 1.31 (s, 9H), 1.30 – 1.15 (m, 20H), 0.83 (t,  $J = 4.9$  Hz, 3H);  $^{13}\text{C}$  NMR (101 MHz,  $\text{DMSO-}d_6$ )  $\delta$  178.89, 171.42, 143.25, 140.10, 139.48, 131.05, 129.68, 129.63, 128.74, 126.62, 125.97, 125.33, 125.01, 124.46, 124.27, 122.71, 120.35, 120.17, 117.75, 109.62, 36.48, 33.69, 31.34, 31.32, 29.13, 29.07, 28.97, 28.87, 28.76, 28.72, 28.62, 28.56, 27.39, 26.60, 25.13, 22.14, 13.99; HRMS [ESI]: calculated for  $\text{C}_{39}\text{H}_{55}\text{N}_2\text{O}_3^+$   $[\text{M}+\text{H}]^+$  : 599.4207, found 599.4203.

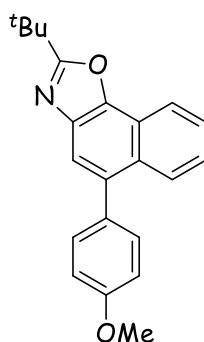

**2-(*tert*-butyl)-5-(4-methoxyphenyl)naphtho[2,1-*d*]oxazole (6a)**: Yield: 90%; pale-yellow solid;  $^1\text{H}$  NMR (400 MHz, DMSO)  $\delta$  8.26 (d,  $J = 8.2$  Hz, 1H), 7.87 (d,  $J = 8.6$  Hz, 1H), 7.73 – 7.68 (m, 1H), 7.67 (s, 1H), 7.57 – 7.51 (m, 1H), 7.40 (d,  $J = 8.4$  Hz, 2H), 7.10 (d,  $J = 8.4$  Hz, 2H), 3.85 (s, 3H), 1.52 (s, 9H);  $^{13}\text{C}$  NMR (101 MHz, DMSO)  $\delta$  172.62, 158.78, 145.08, 136.82, 136.58, 132.07, 131.19, 129.22, 127.11, 126.80, 125.82, 120.11, 119.81, 118.98, 113.99, 55.25, 34.09, 28.40; HRMS [ESI]: calculated for  $\text{C}_{22}\text{H}_{22}\text{NO}_2^+$   $[\text{M}+\text{H}]^+$  : 332.1645, found 332.1636.

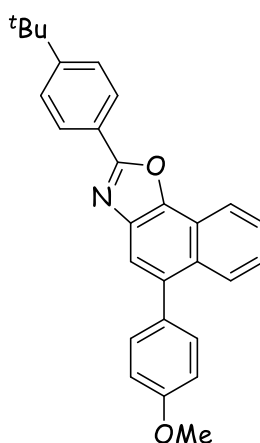

**2-(4-(*tert*-butyl)phenyl)-5-(4-methoxyphenyl)naphtho[2,1-*d*]oxazole (6b):** Yield: 90%; yellow solid; <sup>1</sup>H NMR (400 MHz, CDCl<sub>3</sub>) δ 8.38 (d, *J* = 8.0 Hz, 1H), 8.29 (d, *J* = 8.5 Hz, 2H), 7.98 (d, *J* = 8.5 Hz, 1H), 7.78 (s, 1H), 7.68 – 7.63 (m, 1H), 7.59 (d, *J* = 8.6 Hz, 2H), 7.50 – 7.44 (m, 3H), 7.09 – 7.05 (m, 2H), 3.92 (s, 3H), 1.41 (s, 9H); <sup>13</sup>C NMR (101 MHz, CDCl<sub>3</sub>) δ 162.01, 158.16, 153.92, 144.98, 137.24, 136.90, 132.09, 130.48, 129.46, 126.55, 126.33, 125.78, 125.10, 124.61, 123.75, 119.65, 119.54, 118.45, 112.91, 54.51, 34.22, 30.33; HRMS [ESI]: calculated for C<sub>28</sub>H<sub>26</sub>NO<sub>2</sub><sup>+</sup> [M+H]<sup>+</sup> : 408.1958, found 408.1956.

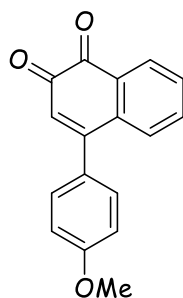

**4-(4-methoxyphenyl)naphthalene-1,2-dione (6c):** Yield: 80%; orange oil; <sup>1</sup>H NMR (400 MHz, DMSO) δ 8.05 (d, *J* = 7.5 Hz, 1H), 7.70 (t, *J* = 7.6 Hz, 1H), 7.62 (t, *J* = 7.5 Hz, 1H), 7.46 (d, *J* = 8.5 Hz, 2H), 7.32 (d, *J* = 7.8 Hz, 1H), 7.11 (d, *J* = 8.5 Hz, 2H), 6.31 (s, 1H), 3.84 (s, 3H); <sup>13</sup>C NMR (101 MHz, DMSO) δ 179.71, 178.95, 160.39, 154.99, 135.02, 134.69, 131.94, 130.68, 129.96, 129.48, 129.11, 128.57, 127.09, 114.30, 55.39; HRMS [ESI]: calculated for C<sub>17</sub>H<sub>13</sub>O<sub>3</sub><sup>+</sup> [M+H]<sup>+</sup> : 265.0859, found 265.0855.

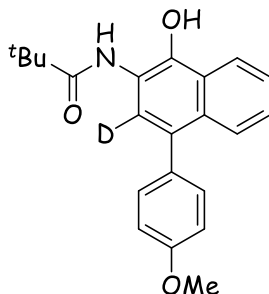

***N*-(1-hydroxy-4-(4-methoxyphenyl)naphthalen-2-yl-3-*d*)pivalamide ([D]-3g):** Yield: 64%; pale-yellow oil; <sup>1</sup>H NMR (400 MHz, DMSO) δ 9.84 (s, 1H), 9.58 (s, 1H), 8.29 (d, *J* = 8.3 Hz, 1H), 7.74 (d, *J* = 8.3 Hz, 1H), 7.54 – 7.48 (m, 1H), 7.47 – 7.42 (m, 1H), 7.37 (d, *J* = 8.6 Hz, 2H), 7.08 (d, *J* = 8.6 Hz, 2H), 3.83 (s, 3H), 1.31 (s, 9H); HRMS [ESI]: calculated for C<sub>22</sub>H<sub>22</sub>DNO<sub>3</sub><sup>+</sup> [M+H]<sup>+</sup> : 351.1813, found 351.1807.

## VIII. Copies of <sup>1</sup>H, <sup>13</sup>C NMR and <sup>19</sup>F spectra

PROTON\_01

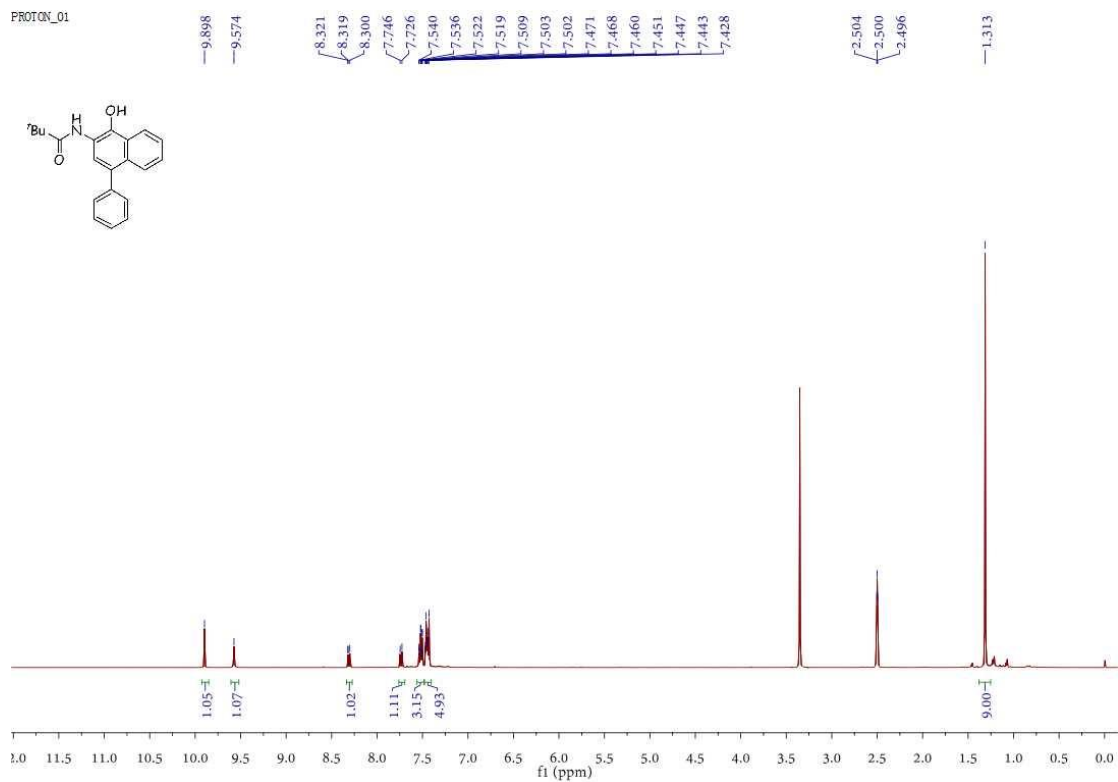

<sup>1</sup>H - NMR spectrum of compound - **3a** (400 MHz, DMSO-*d*<sub>6</sub>)

CARBON\_01

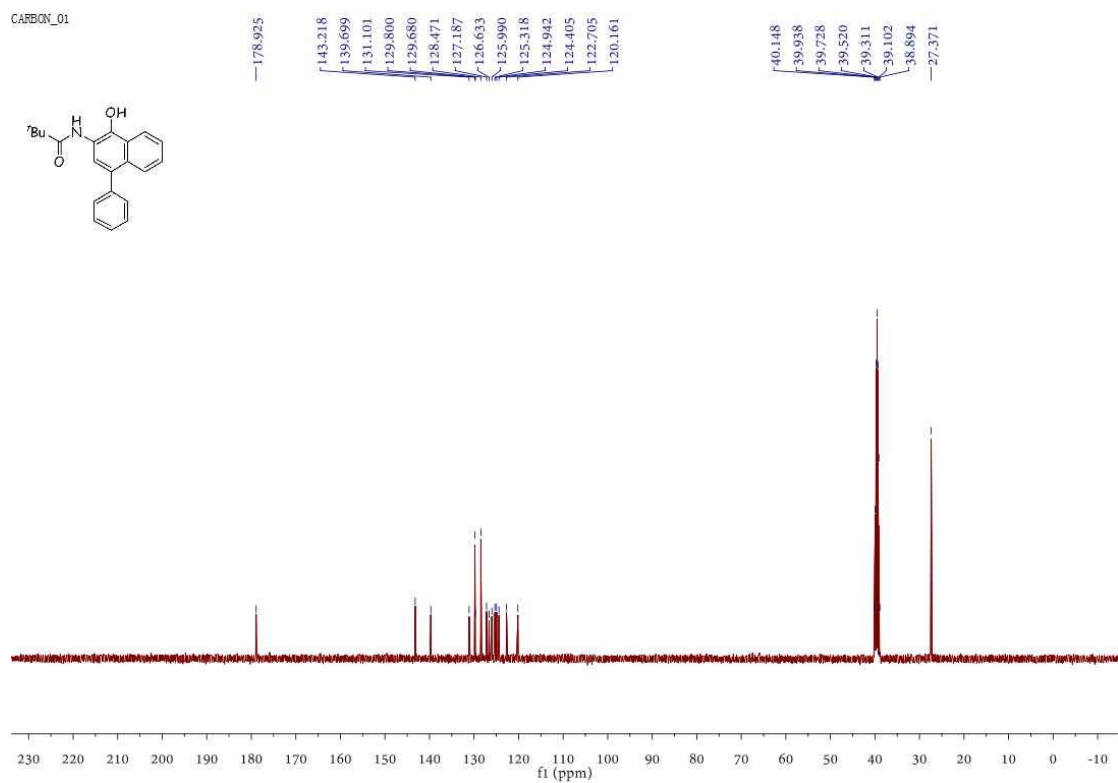

<sup>13</sup>C - NMR spectrum of compound - **3a** (101 MHz, DMSO-*d*<sub>6</sub>)

PROTON\_01

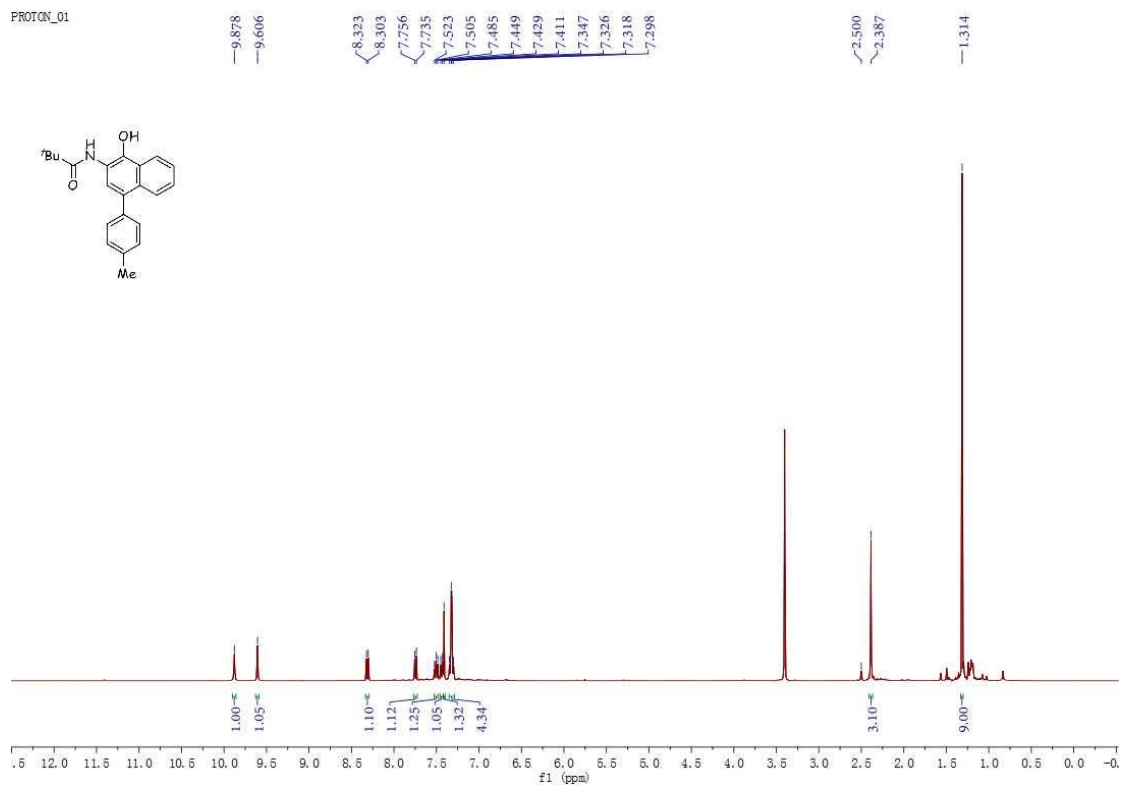

<sup>1</sup>H – NMR spectrum of compound – **3b** (400 MHz, DMSO-*d*<sub>6</sub>)

CARBON\_01

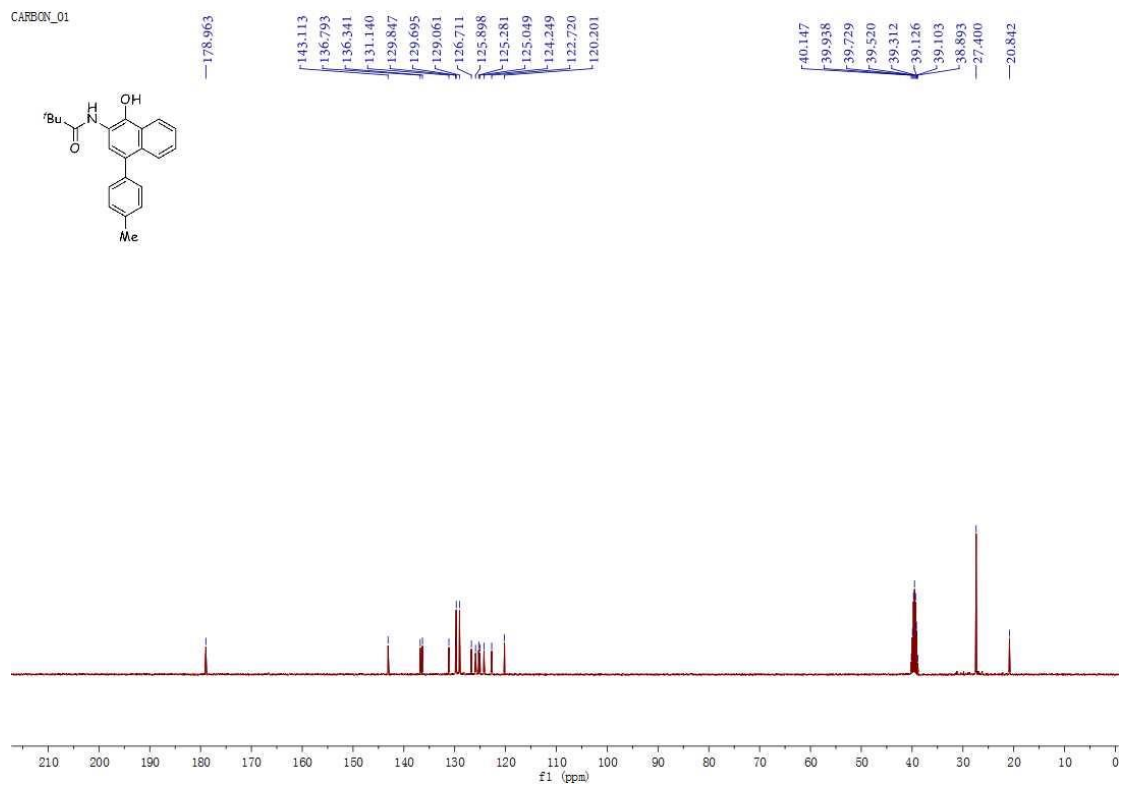

<sup>13</sup>C – NMR spectrum of compound – **3b** (101 MHz, DMSO-*d*<sub>6</sub>)

20221125R-J-1

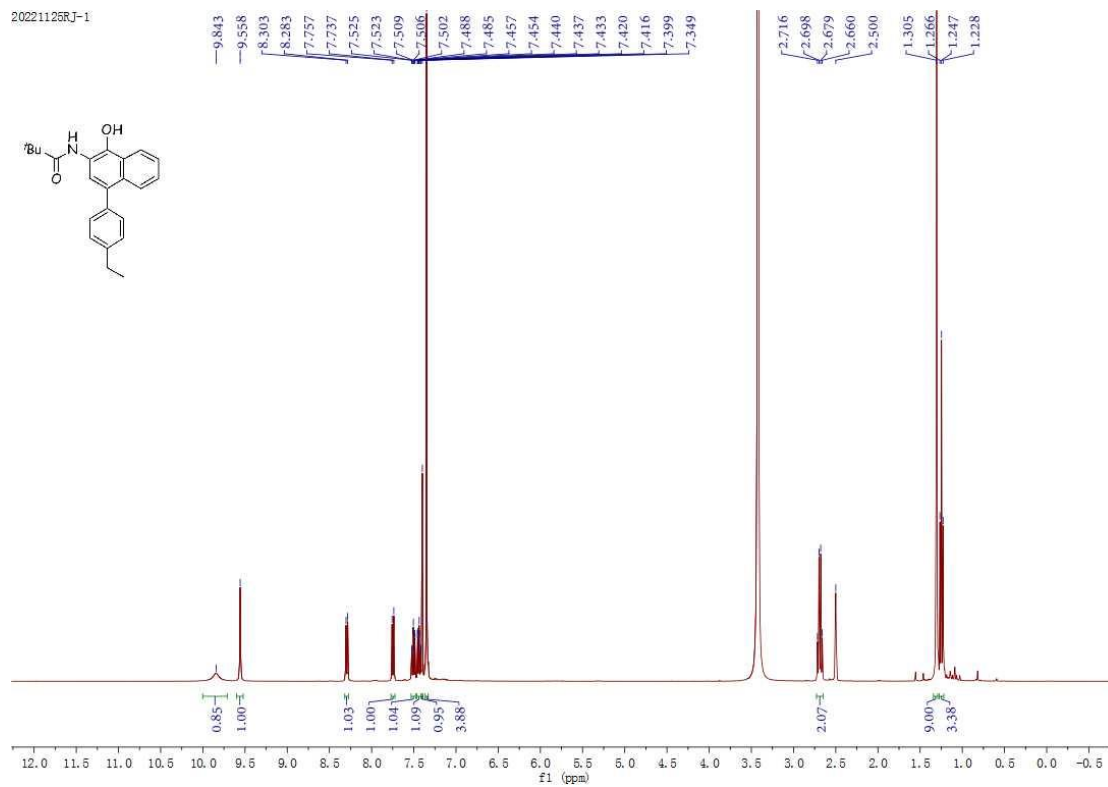

**<sup>1</sup>H - NMR spectrum of compound – 3c (400 MHz, DMSO-*d*<sub>6</sub>)**

20221125R-J-1

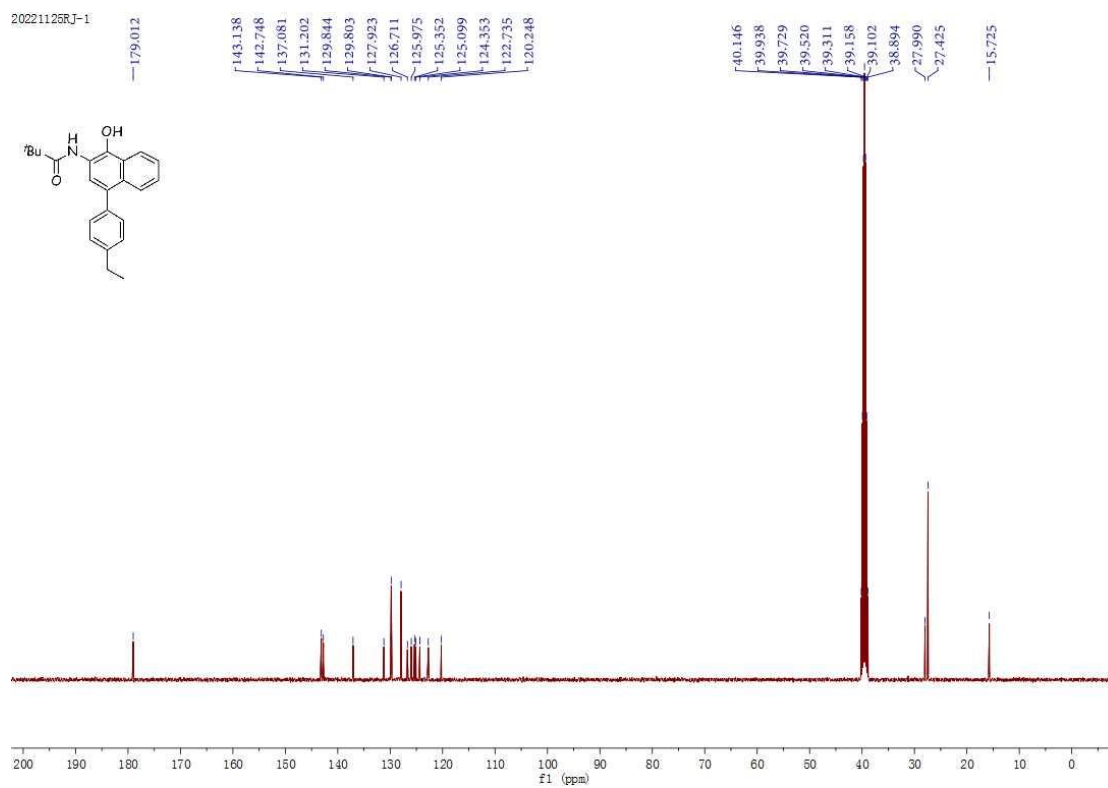

**<sup>13</sup>C - NMR spectrum of compound – 3c (101 MHz, DMSO-*d*<sub>6</sub>)**

20221125RJ-2

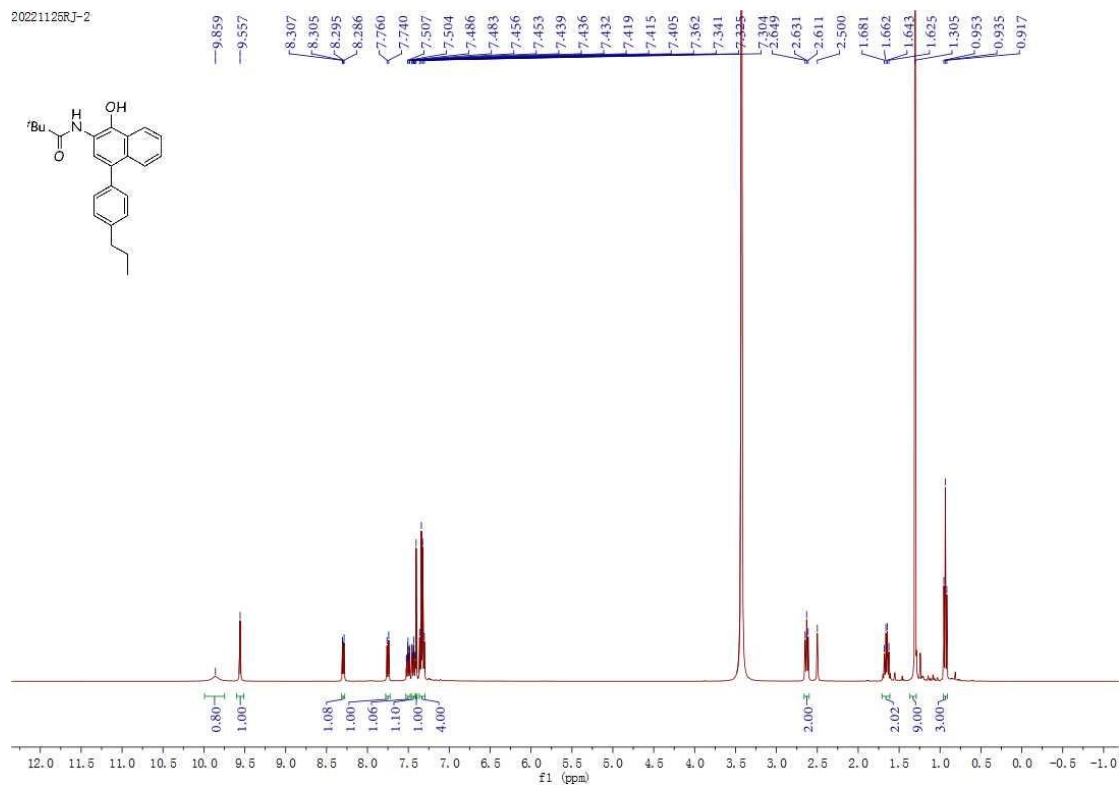

<sup>1</sup>H – NMR spectrum of compound – 3d (400 MHz, DMSO-*d*<sub>6</sub>)

20221125RJ-2

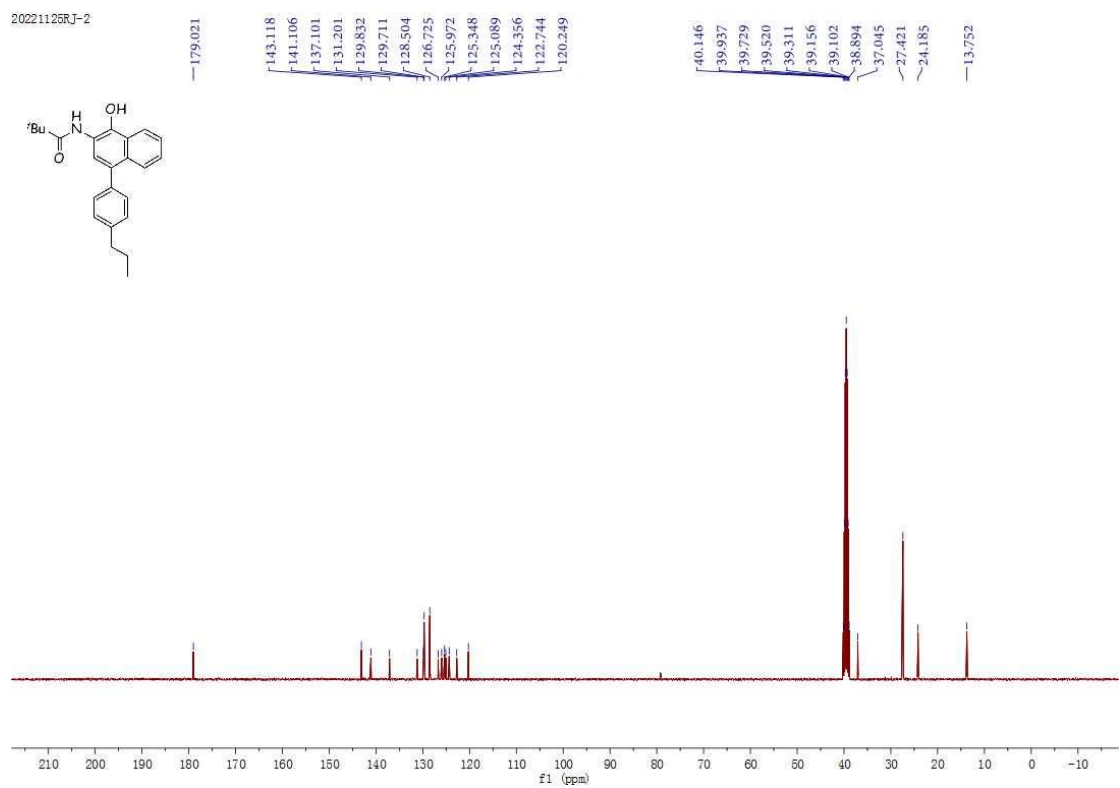

<sup>13</sup>C – NMR spectrum of compound – 3d (101 MHz, DMSO-*d*<sub>6</sub>)



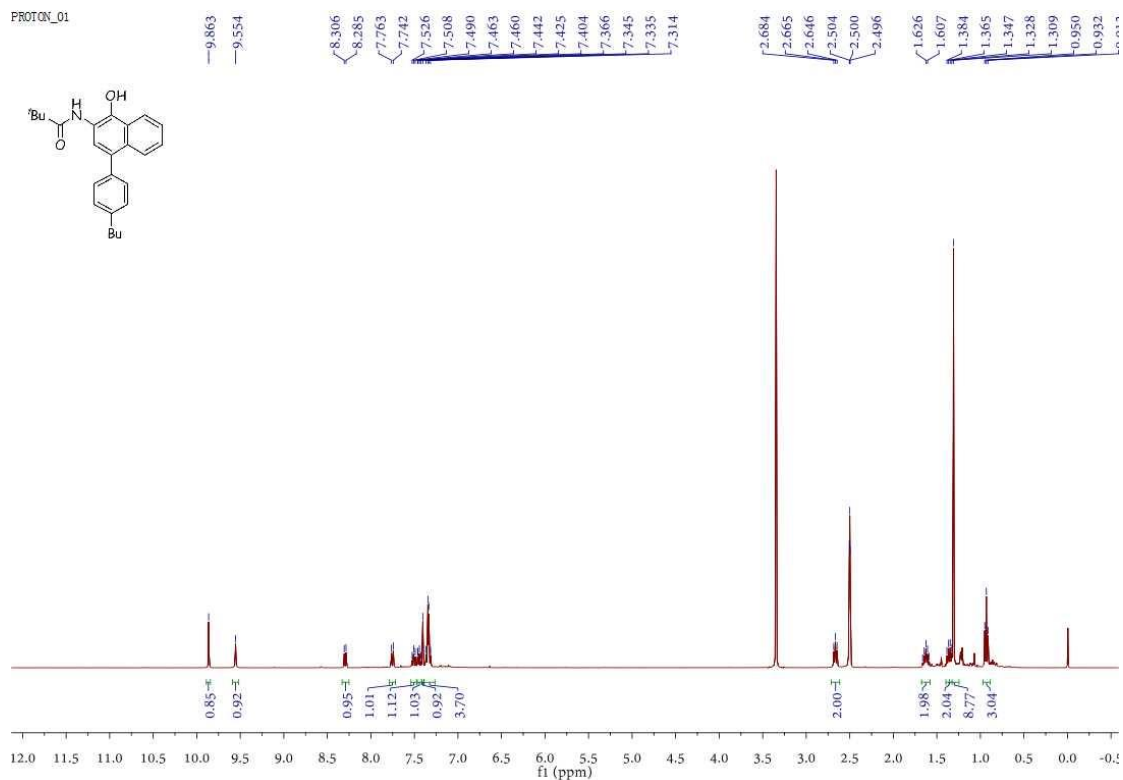

$^1\text{H}$  - NMR spectrum of compound - **3e** (400 MHz,  $\text{DMSO-}d_6$ )

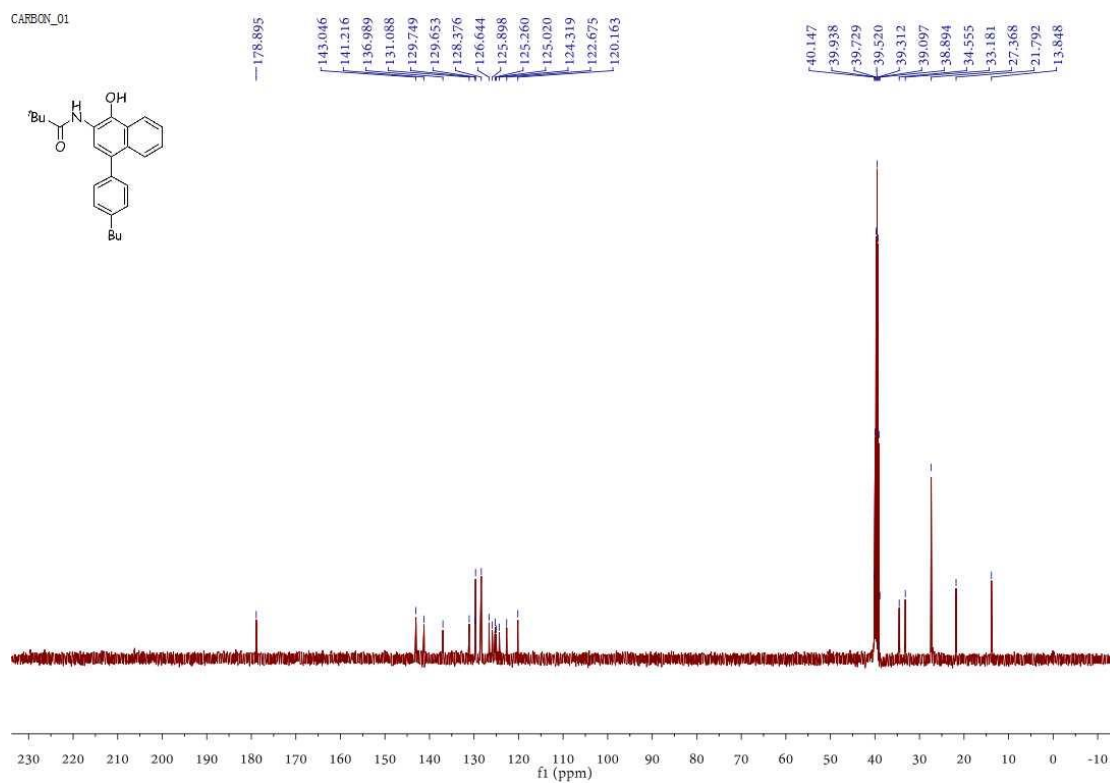

$^{13}\text{C}$  - NMR spectrum of compound - **3e** (101 MHz,  $\text{DMSO-}d_6$ )

20220325-YJS-LKZ-346

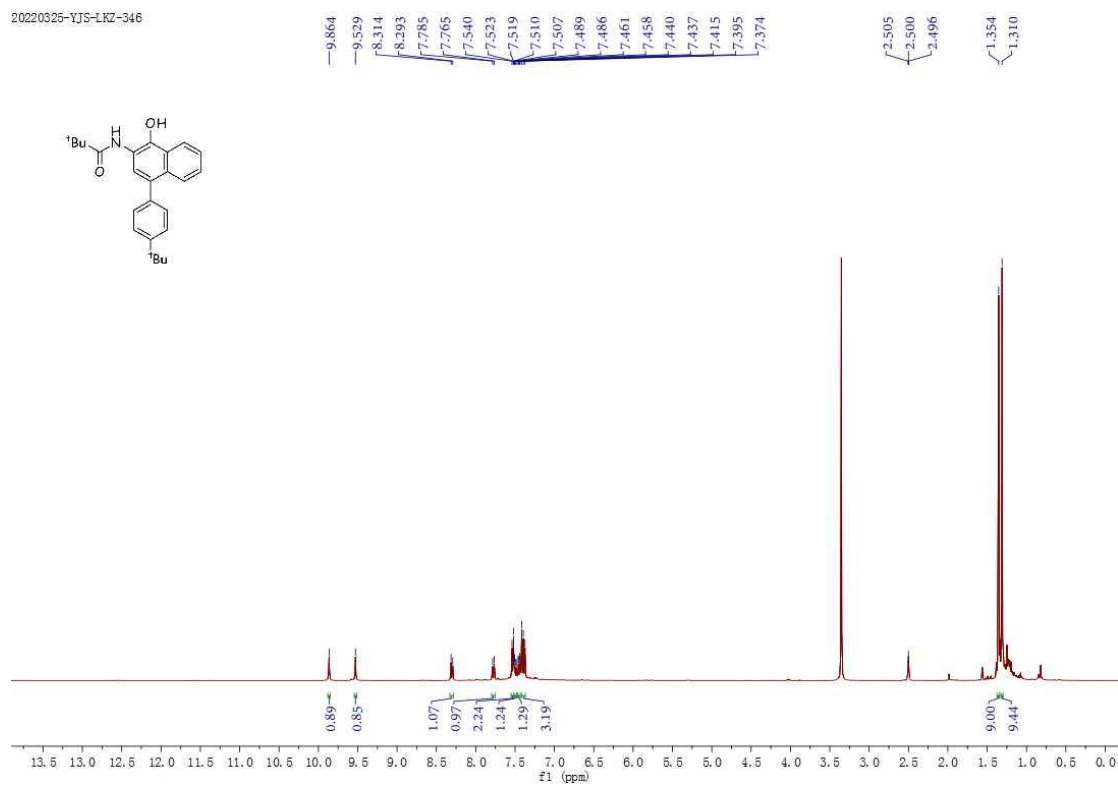

<sup>1</sup>H - NMR spectrum of compound – 3f (400 MHz, DMSO-*d*<sub>6</sub>)

20220325-YJS-LKZ-346

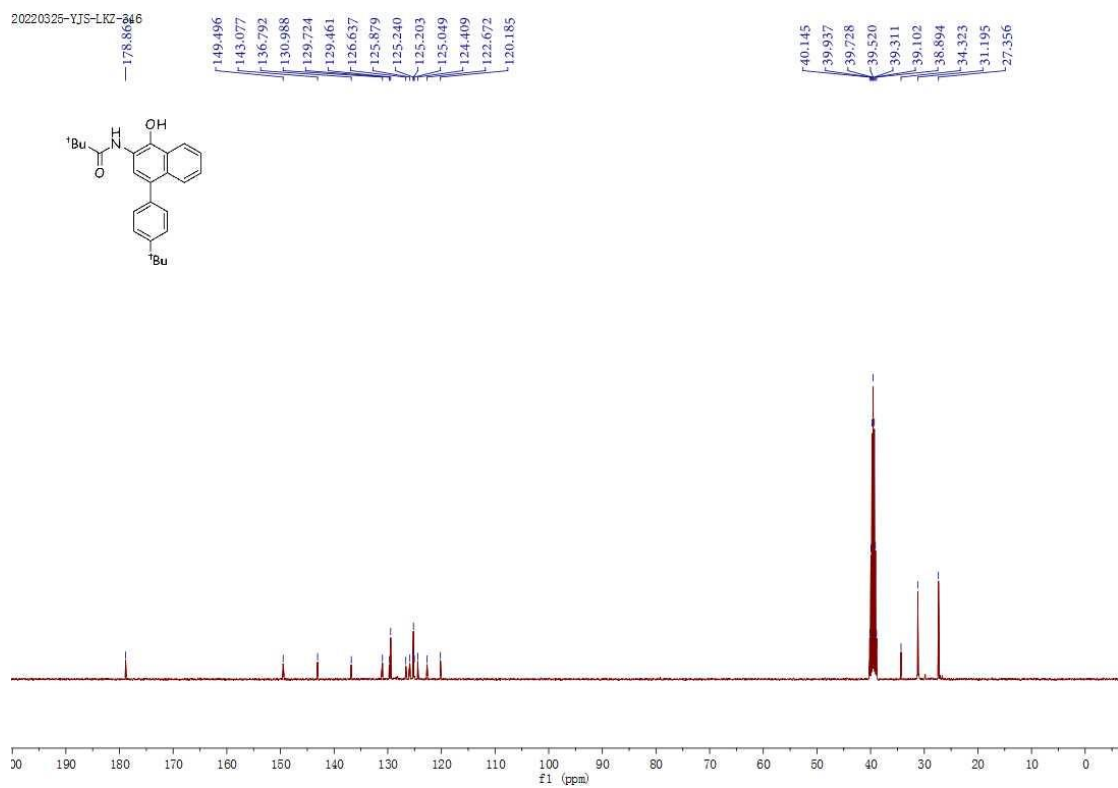

<sup>13</sup>C - NMR spectrum of compound – 3f (101 MHz, DMSO-*d*<sub>6</sub>)

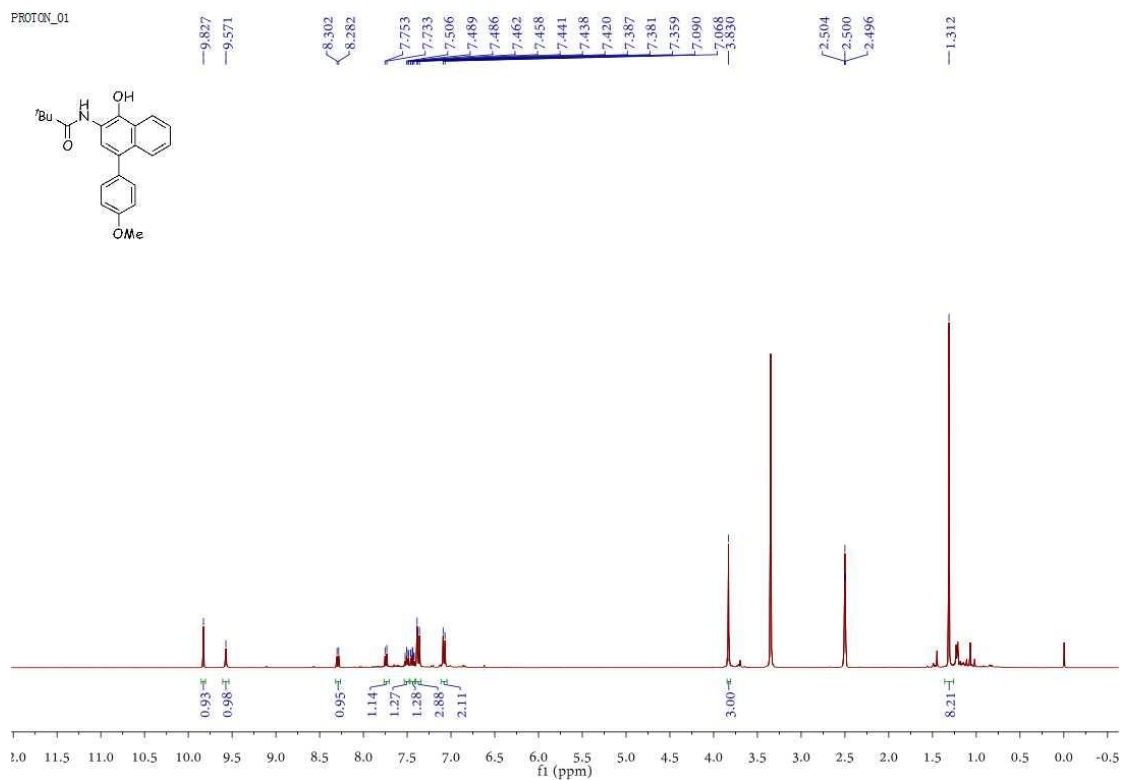

<sup>1</sup>H – NMR spectrum of compound – **3g** (400 MHz, DMSO-*d*<sub>6</sub>)

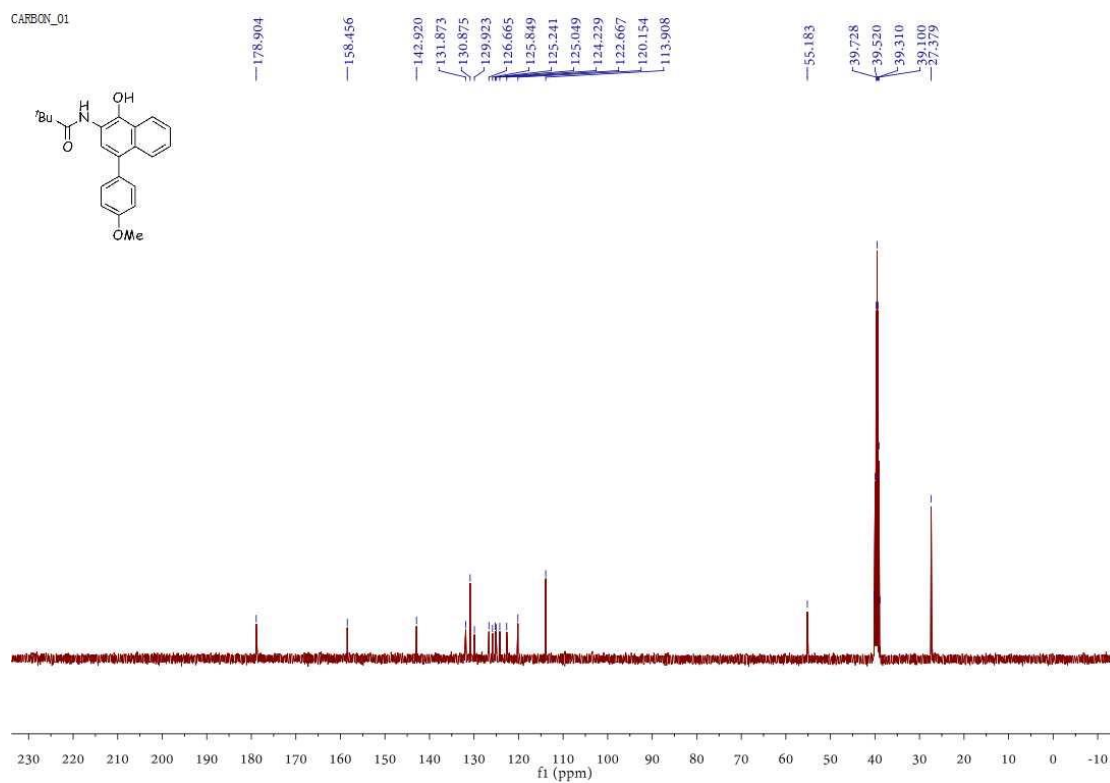

<sup>13</sup>C – NMR spectrum of compound – **3g** (101 MHz, DMSO-*d*<sub>6</sub>)

PROTON\_01

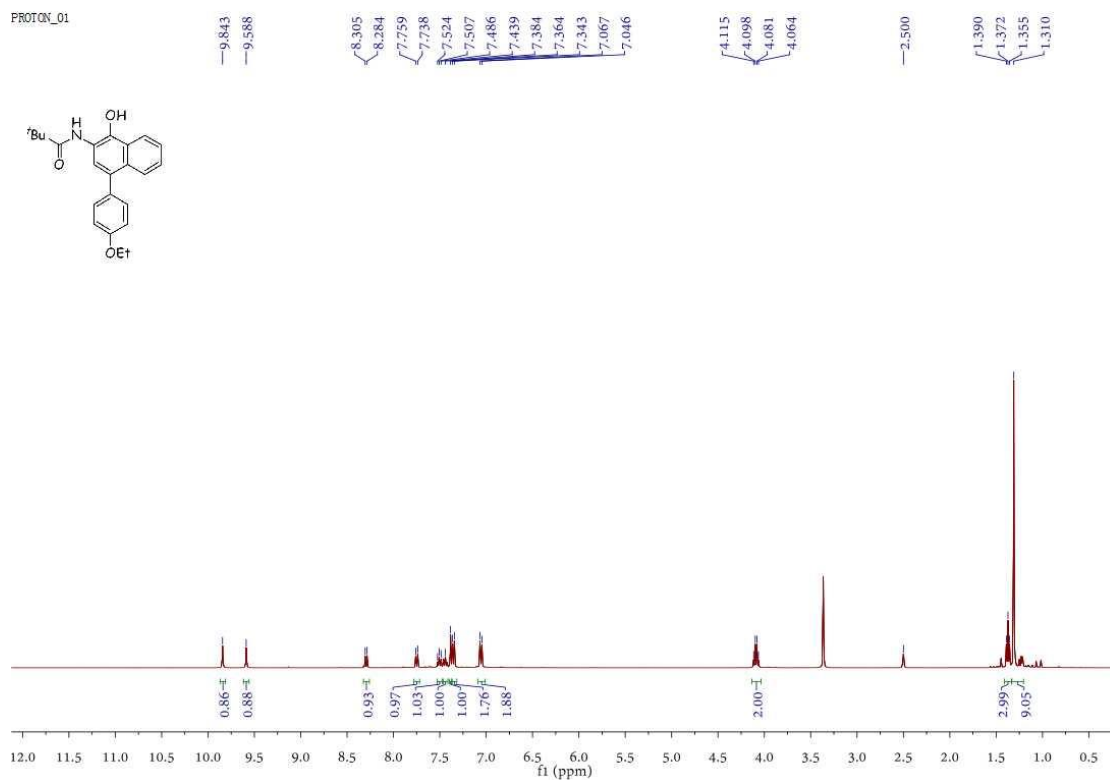

<sup>1</sup>H – NMR spectrum of compound – **3h** (400 MHz, DMSO-*d*<sub>6</sub>)

CARBON\_01

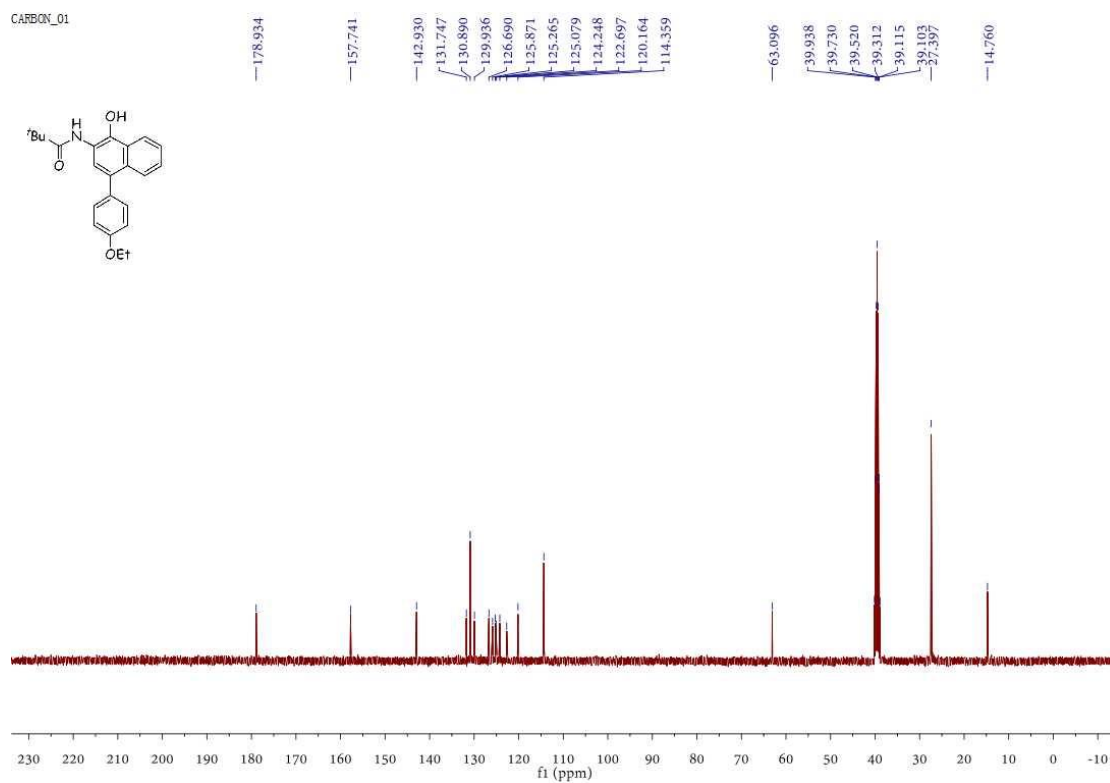

<sup>13</sup>C – NMR spectrum of compound – **3h** (101 MHz, DMSO-*d*<sub>6</sub>)

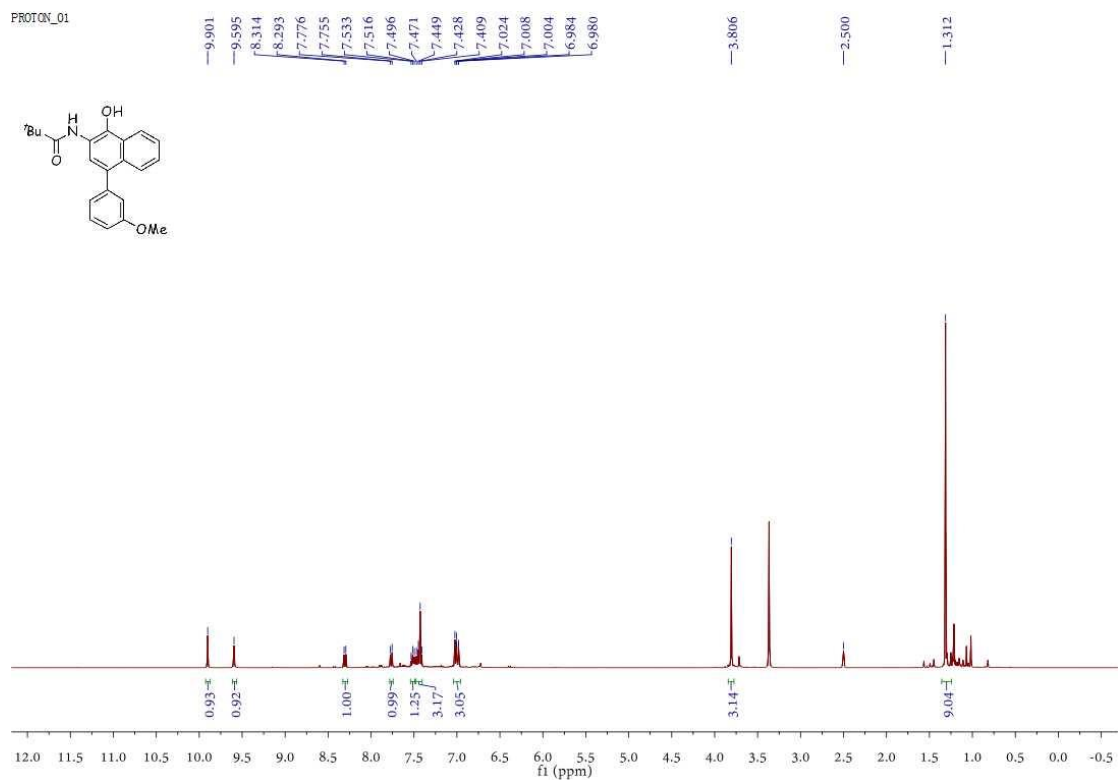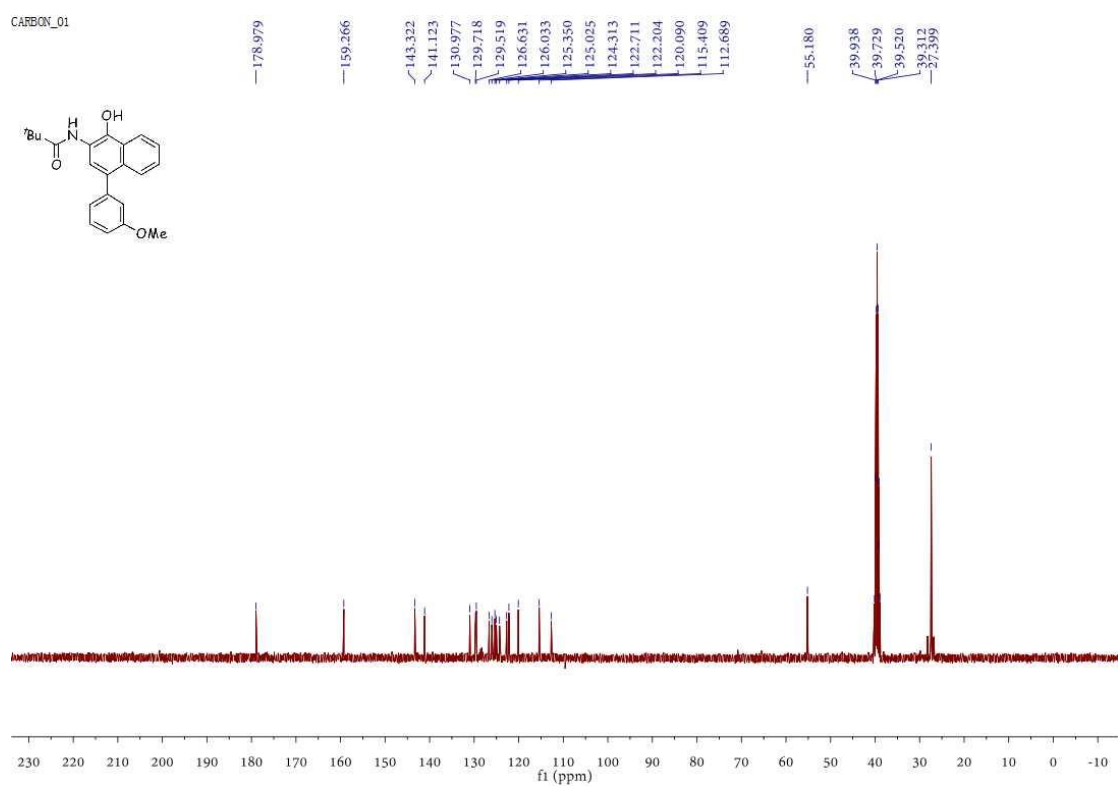

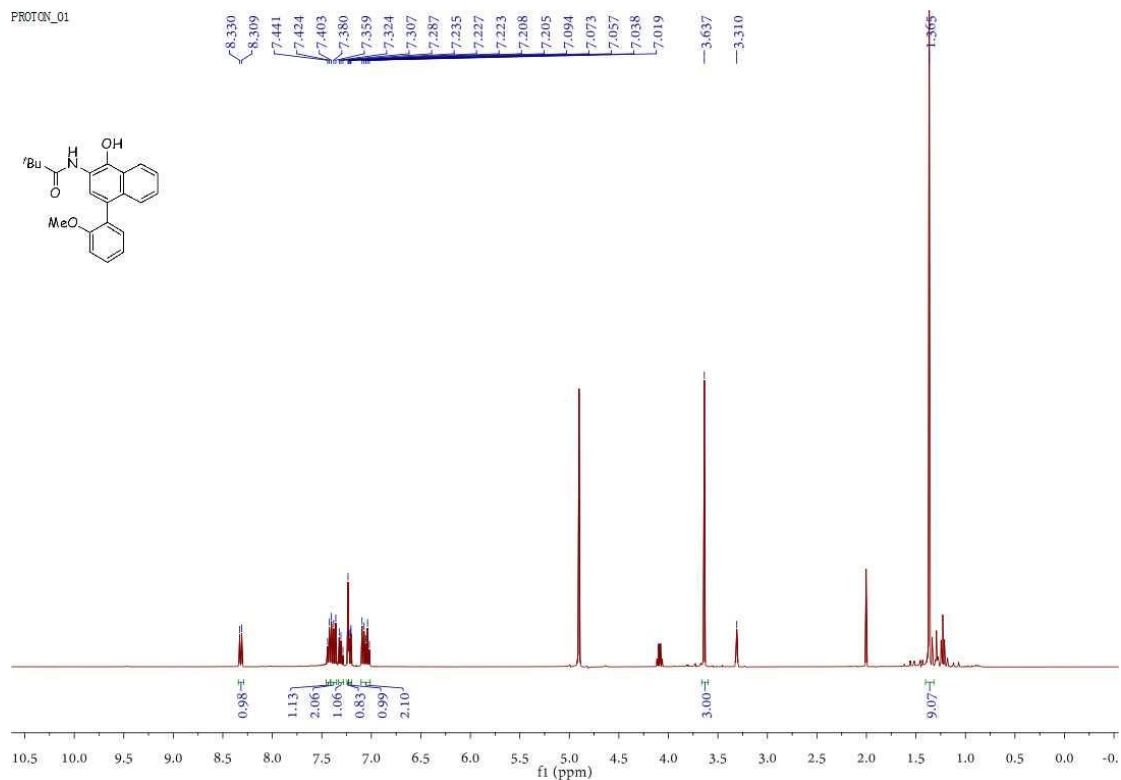

<sup>1</sup>H – NMR spectrum of compound – **3j** (400 MHz, CD<sub>3</sub>OD)

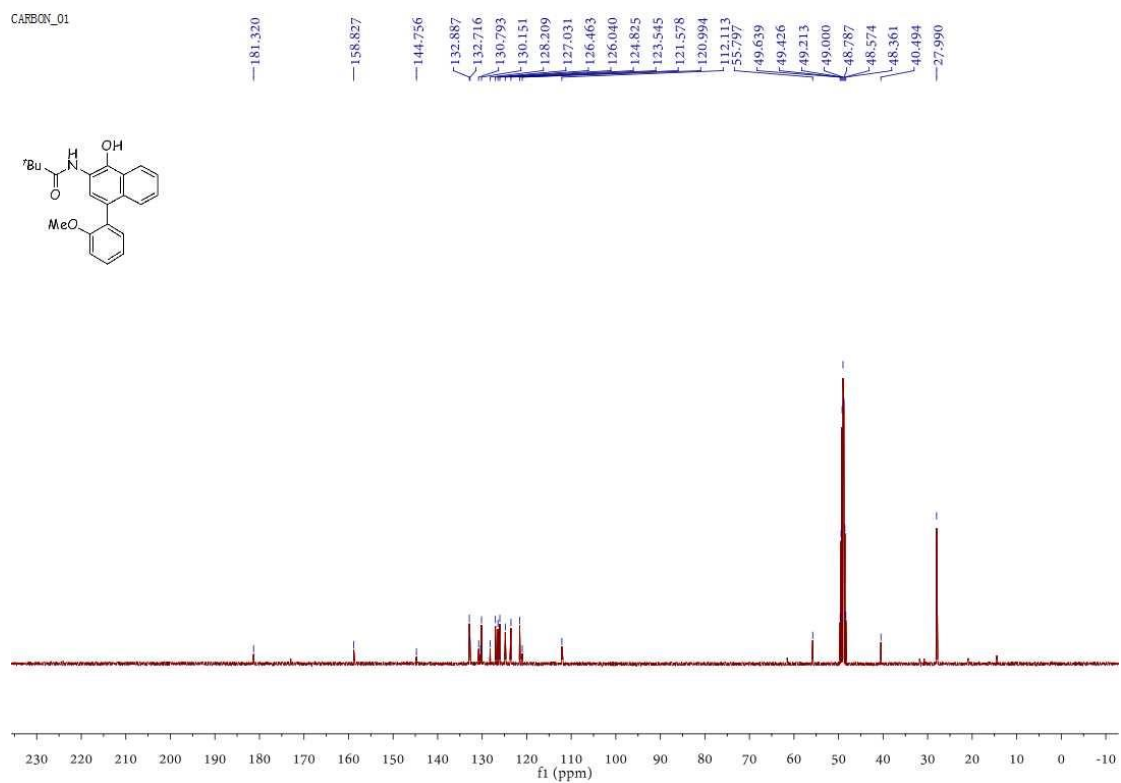

<sup>13</sup>C – NMR spectrum of compound – **3j** (101 MHz, CD<sub>3</sub>OD)

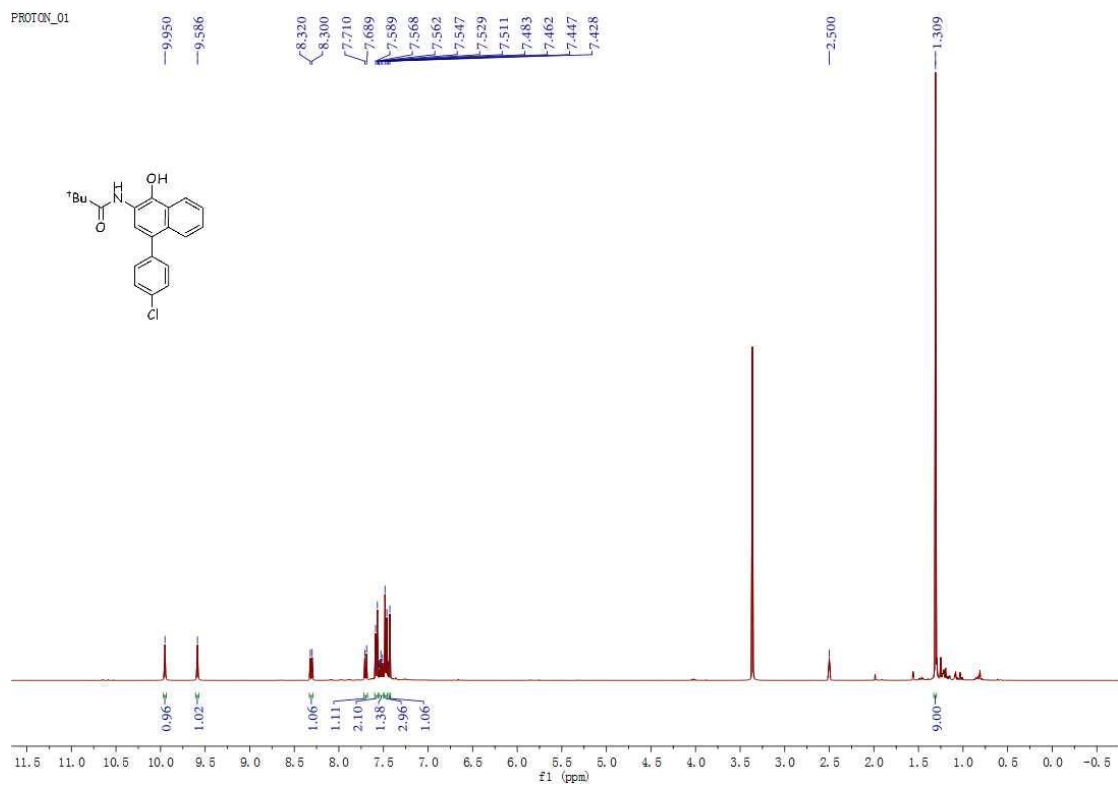

<sup>1</sup>H – NMR spectrum of compound – **3k** (400 MHz, DMSO-*d*<sub>6</sub>)

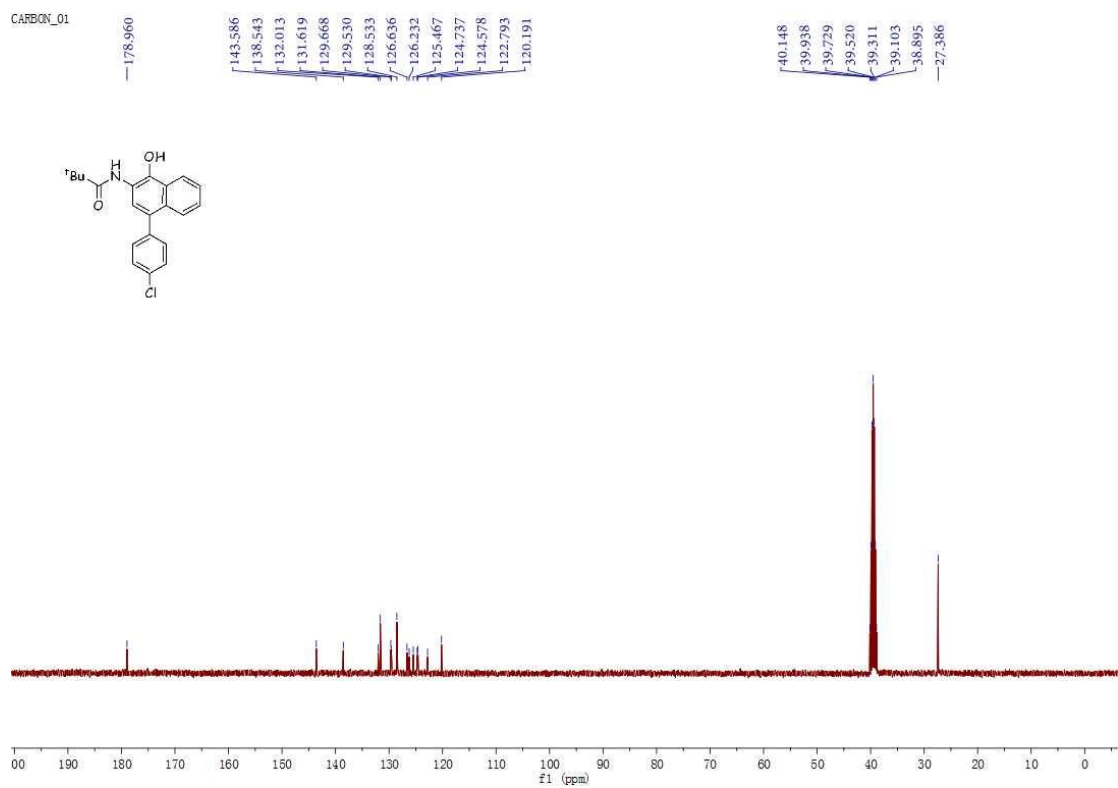

<sup>13</sup>C – NMR spectrum of compound – **3k** (101 MHz, DMSO-*d*<sub>6</sub>)

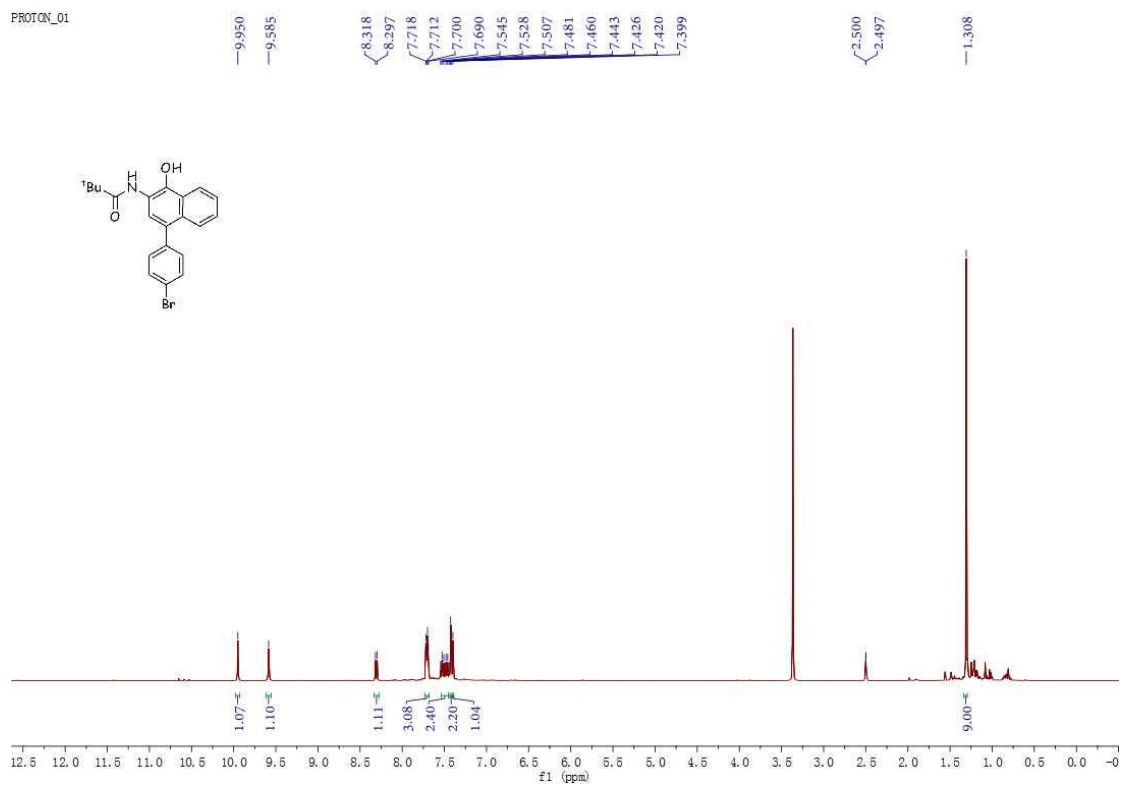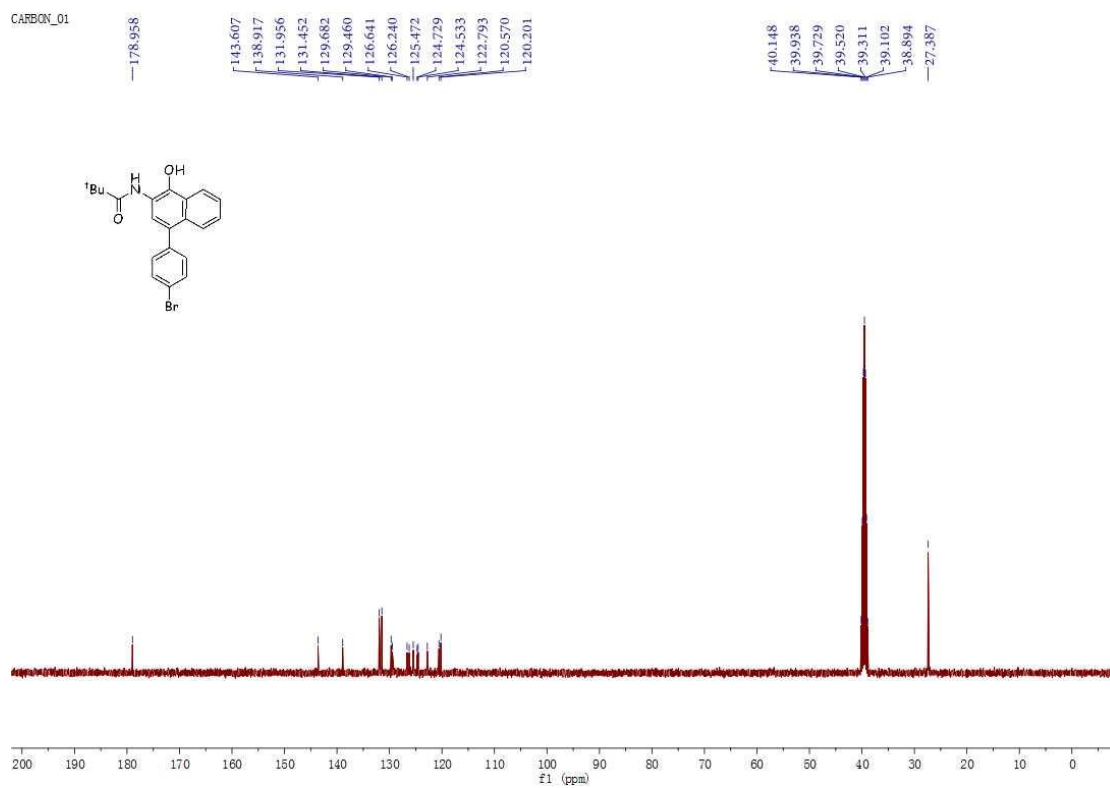



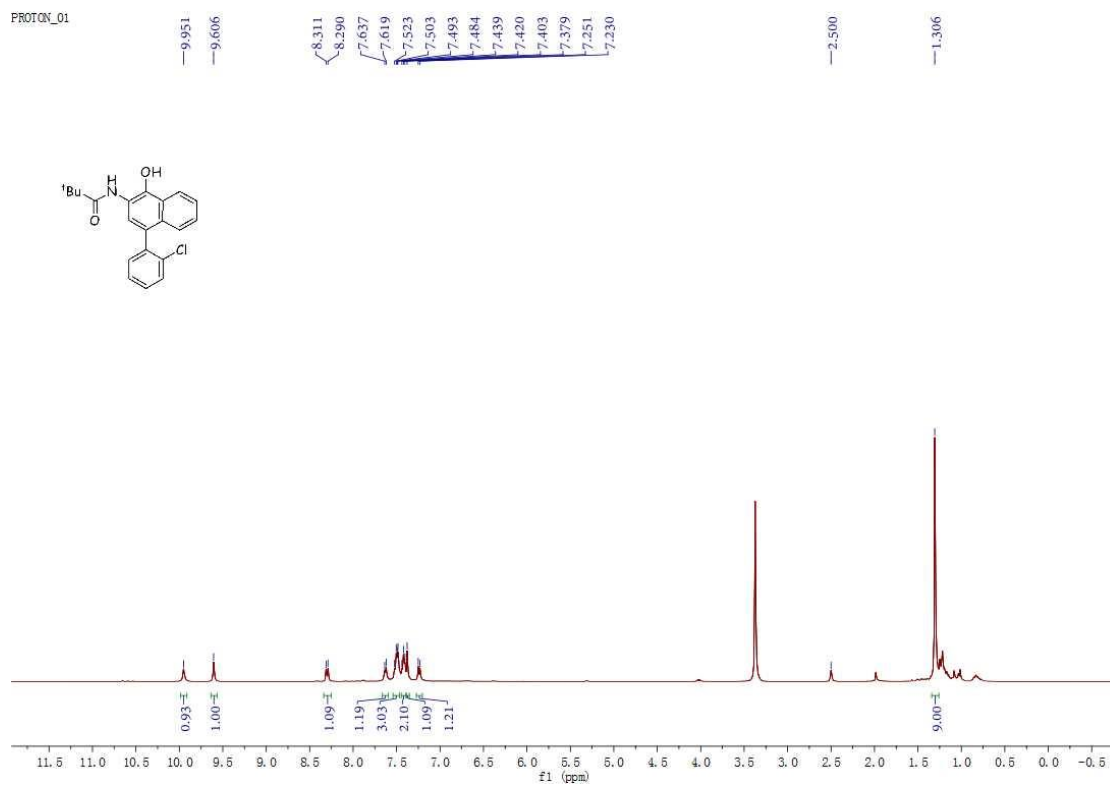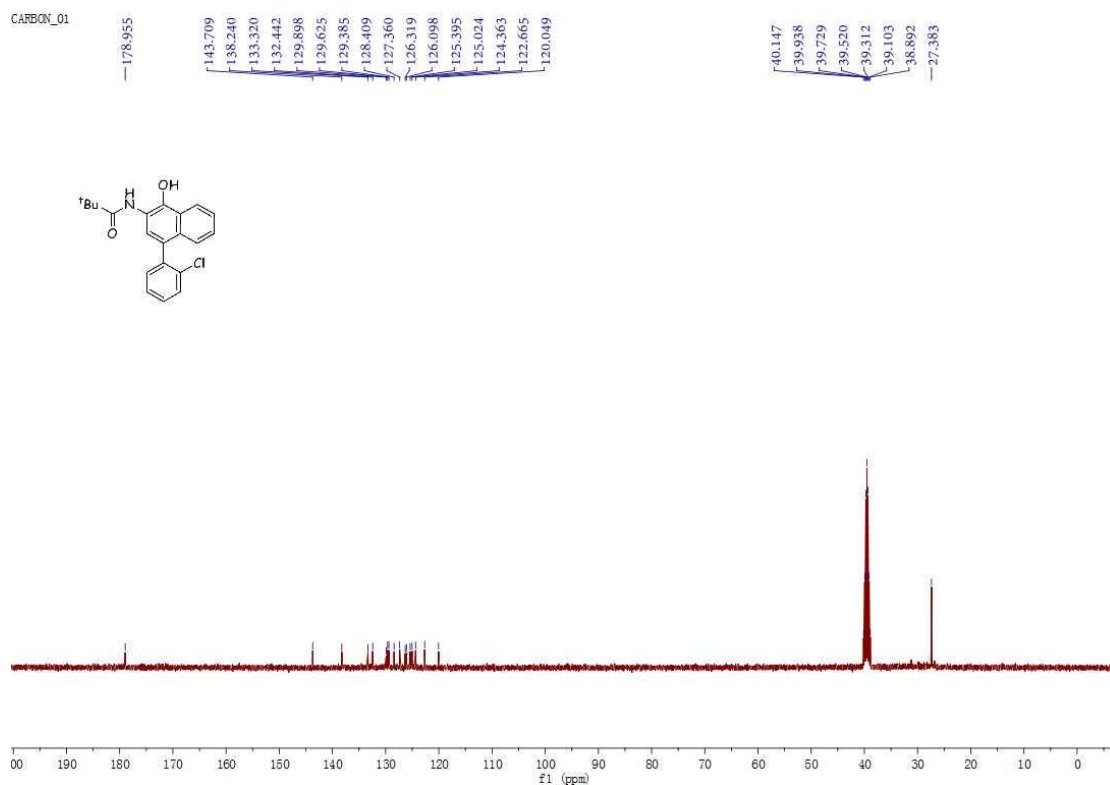

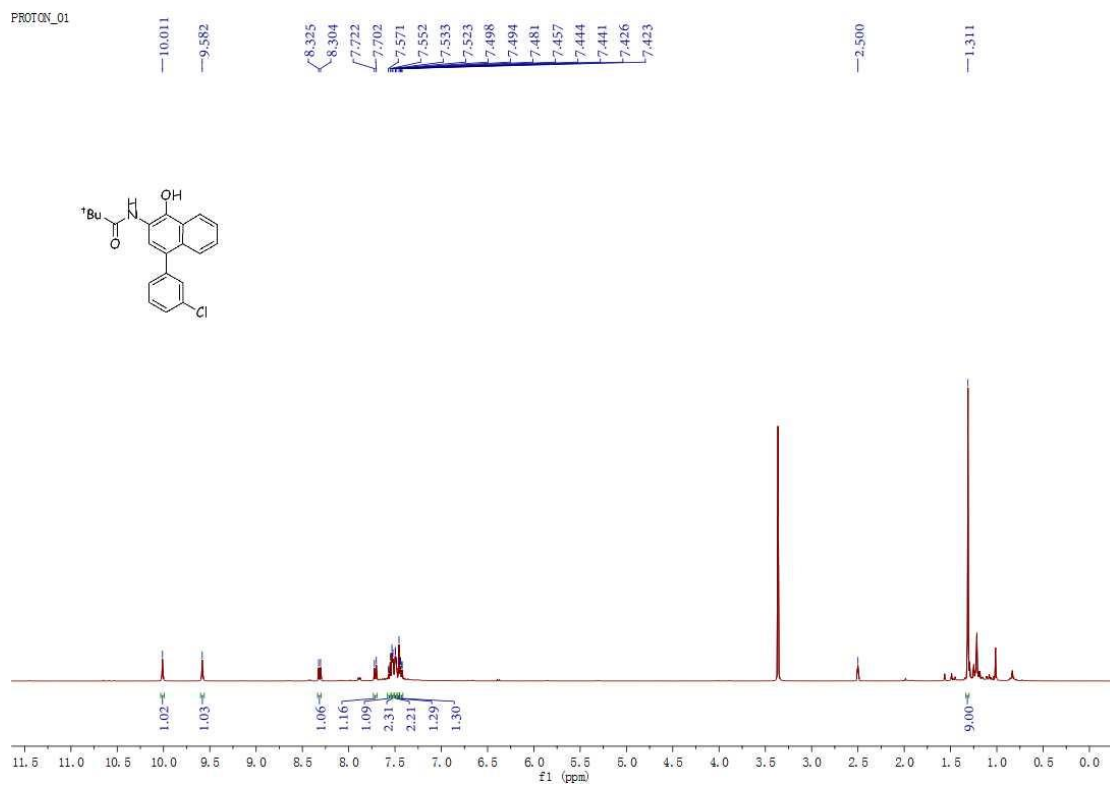

<sup>1</sup>H – NMR spectrum of compound – **3n** (400 MHz, DMSO-*d*<sub>6</sub>)

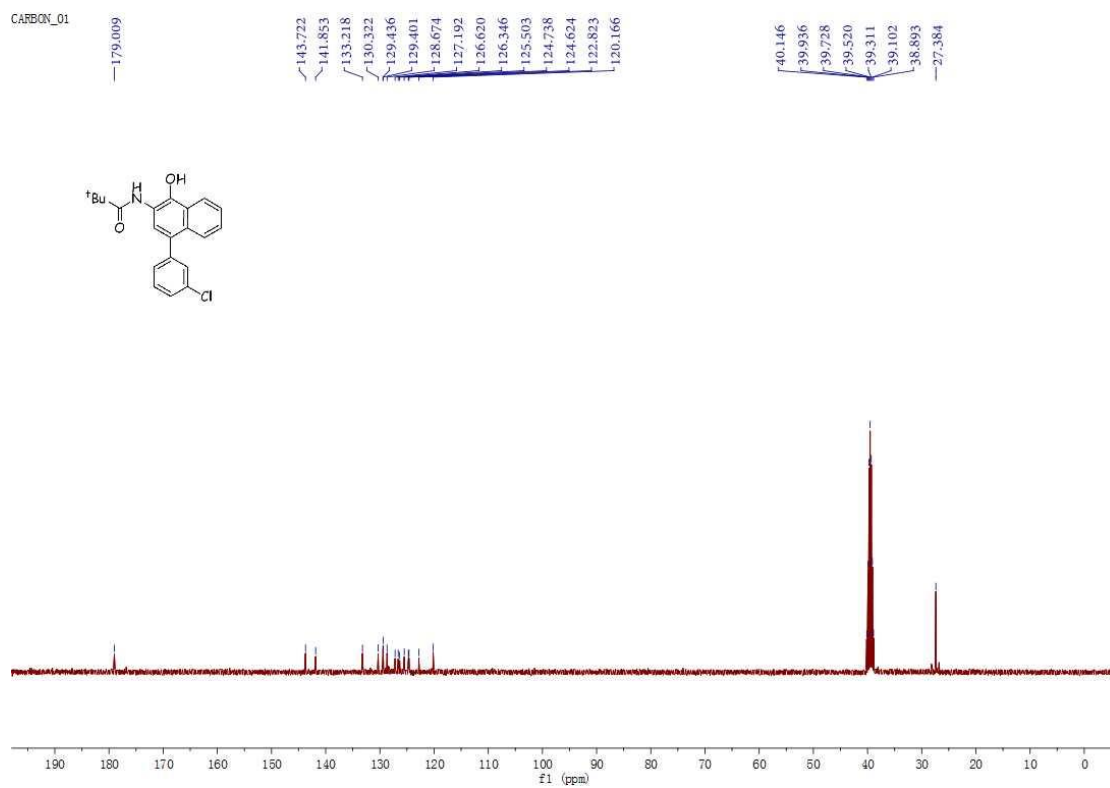

<sup>13</sup>C – NMR spectrum of compound – **3n** (101 MHz, DMSO-*d*<sub>6</sub>)

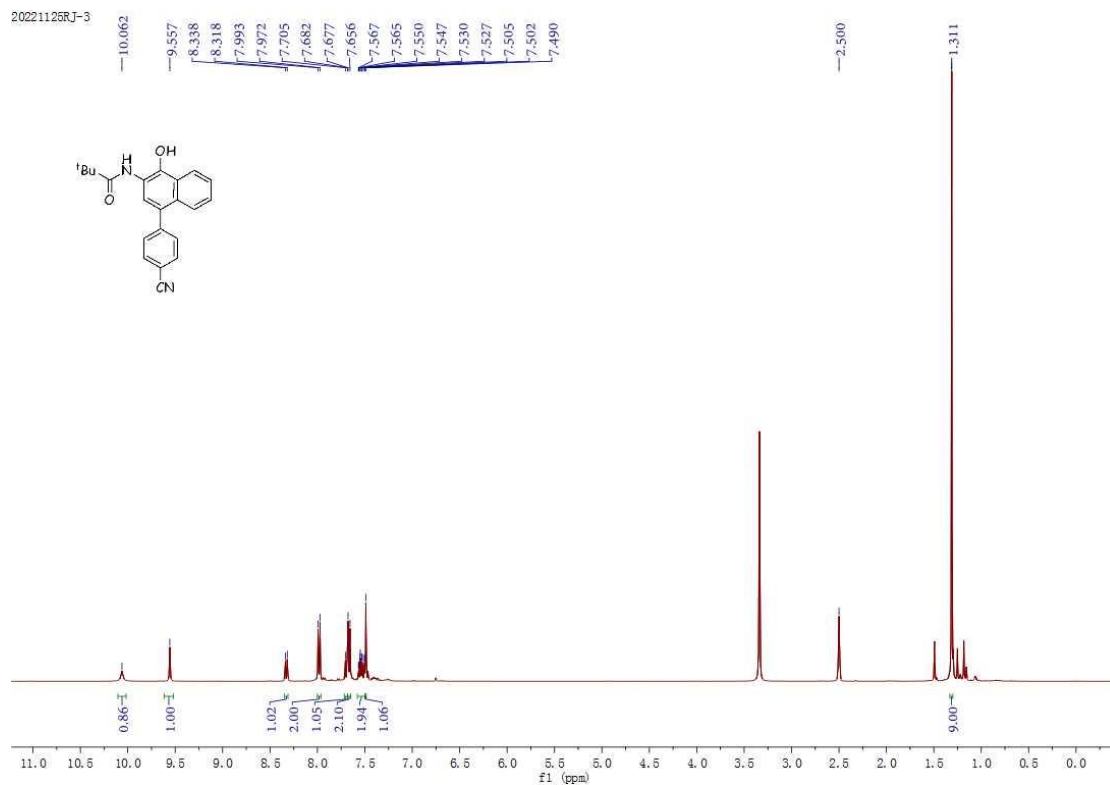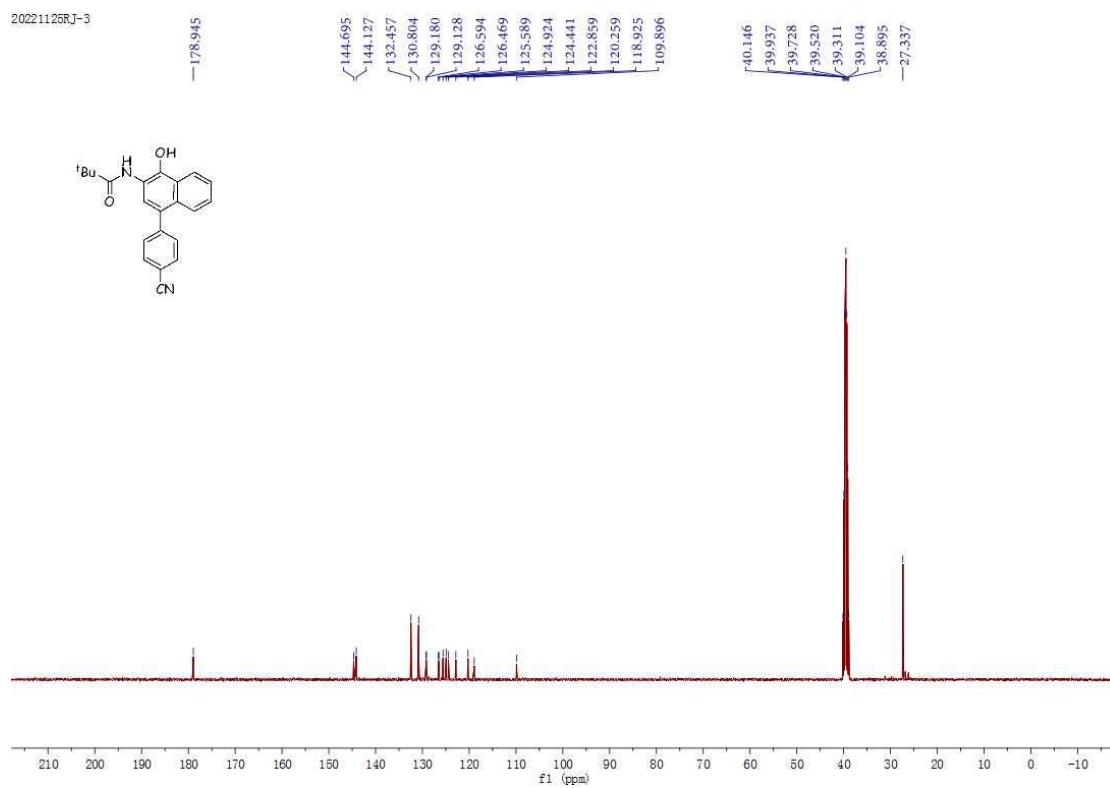

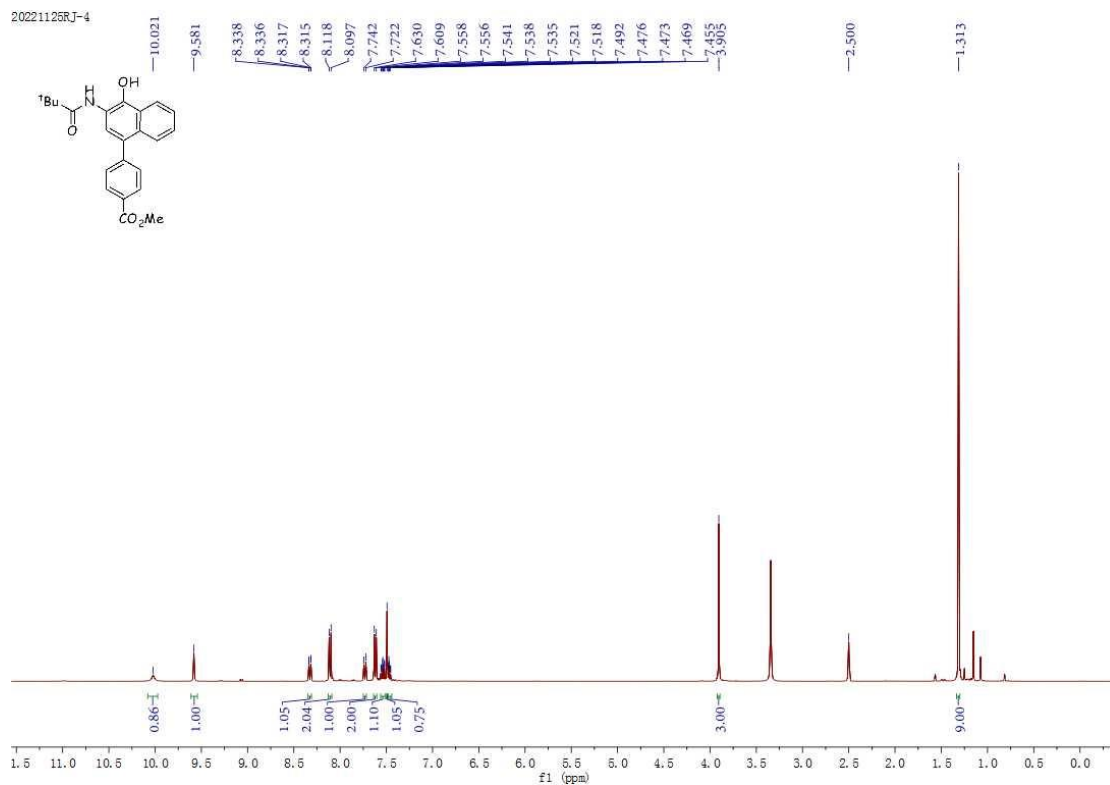

$^1\text{H}$  - NMR spectrum of compound - **3p** (400 MHz,  $\text{DMSO-}d_6$ )

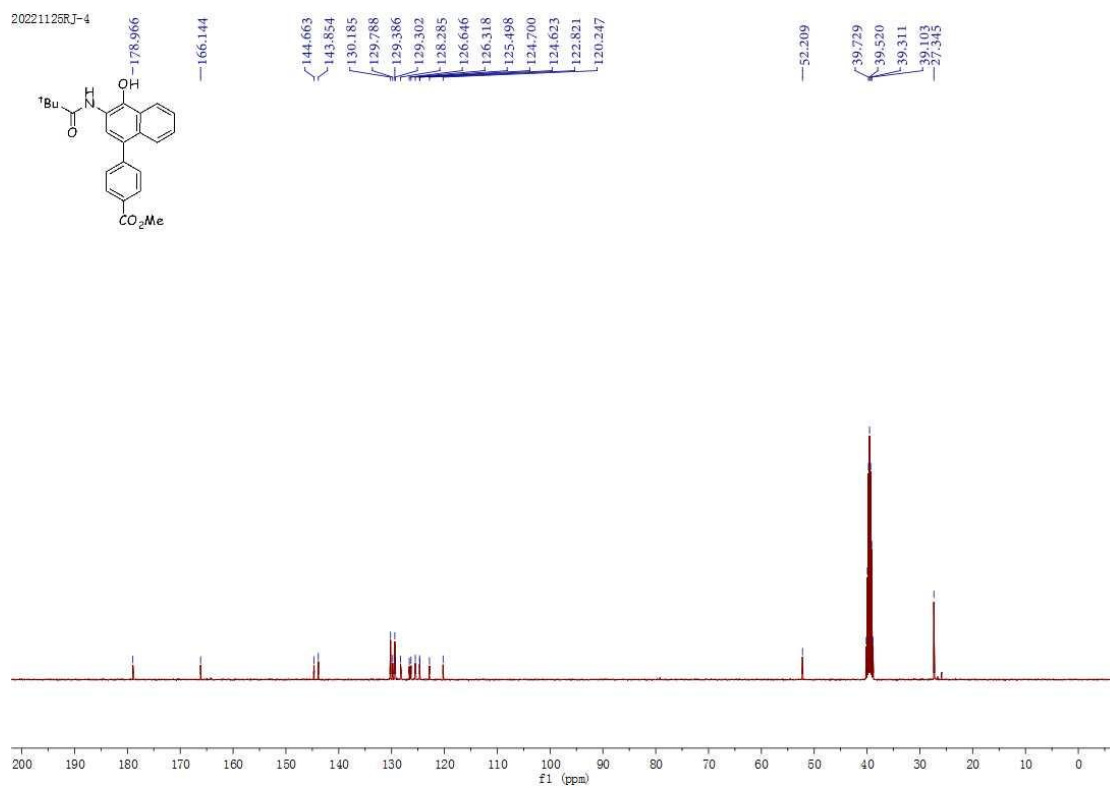

$^{13}\text{C}$  - NMR spectrum of compound - **3p** (101 MHz,  $\text{DMSO-}d_6$ )

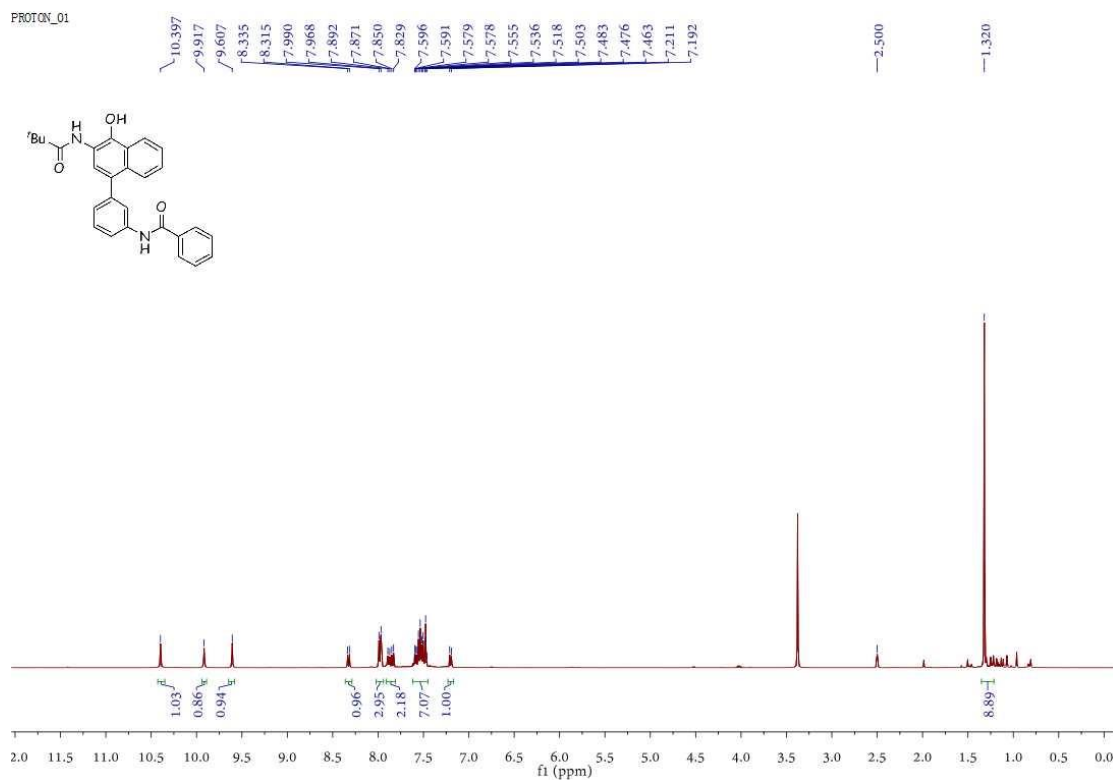

$^1\text{H}$  - NMR spectrum of compound - **3q** (400 MHz,  $\text{DMSO-}d_6$ )

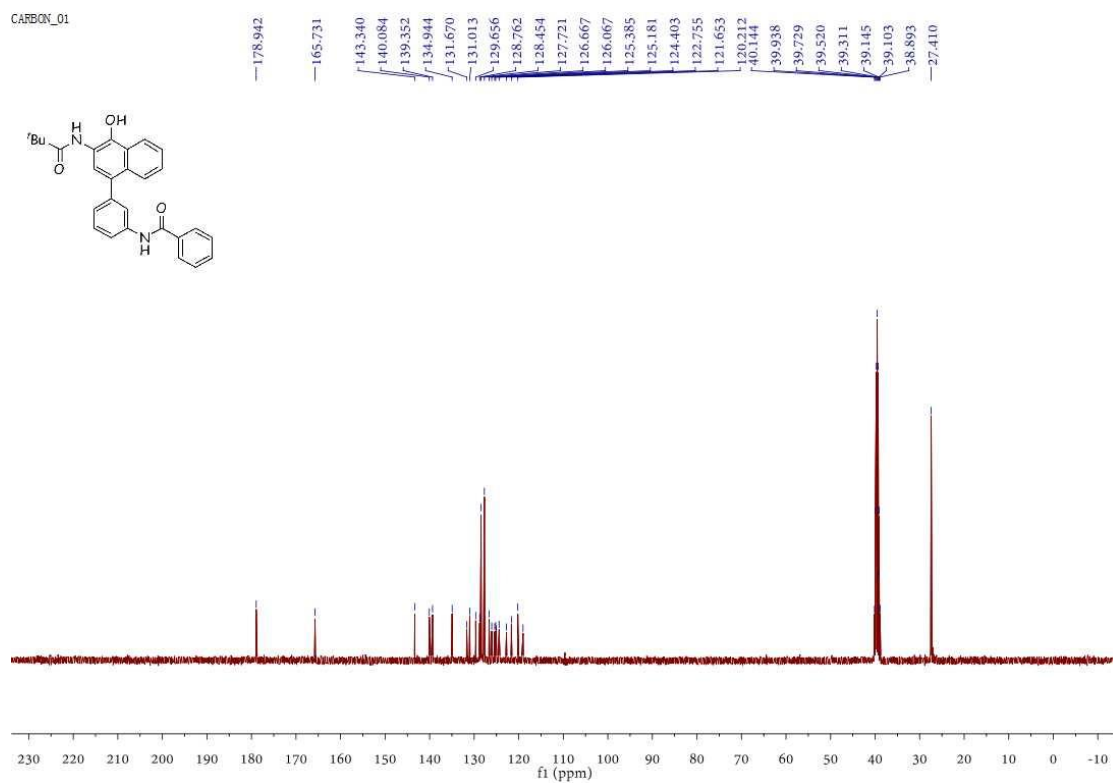

$^{13}\text{C}$  - NMR spectrum of compound - **3q** (101 MHz,  $\text{DMSO-}d_6$ )

20220325-YJS-LKZ-281

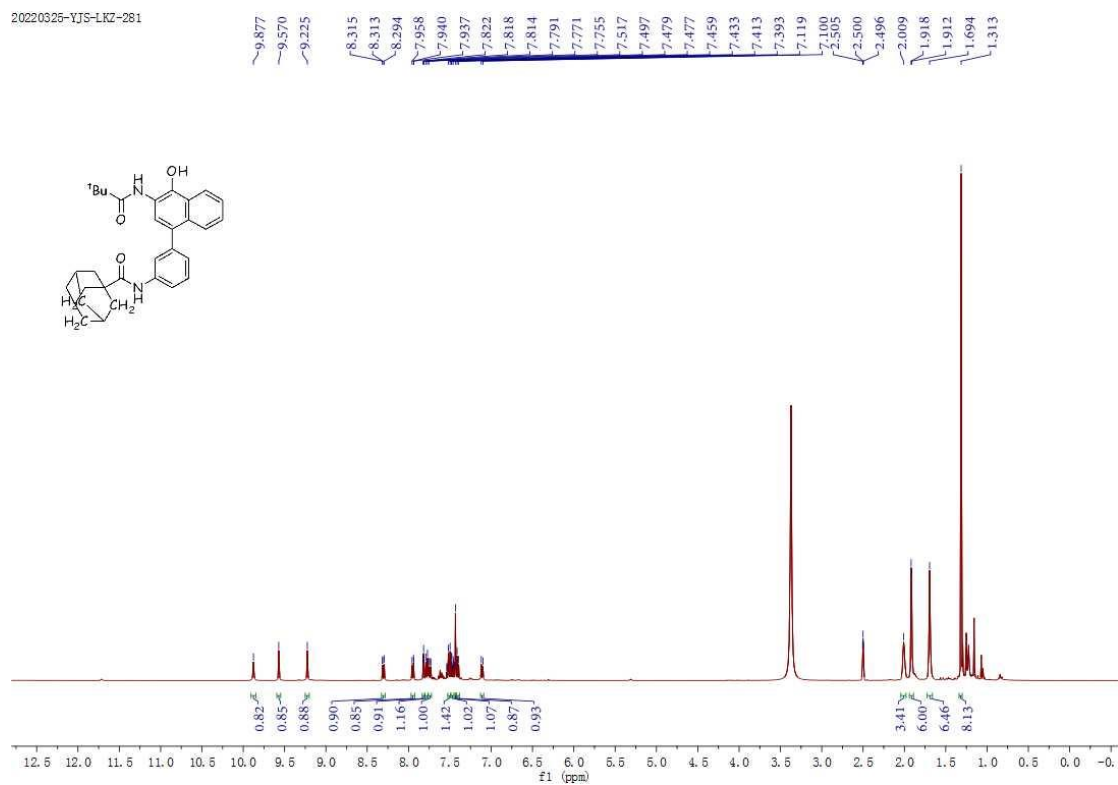

<sup>1</sup>H - NMR spectrum of compound – **3r** (400 MHz, DMSO-*d*<sub>6</sub>)

20220325-YJS-LKZ-281

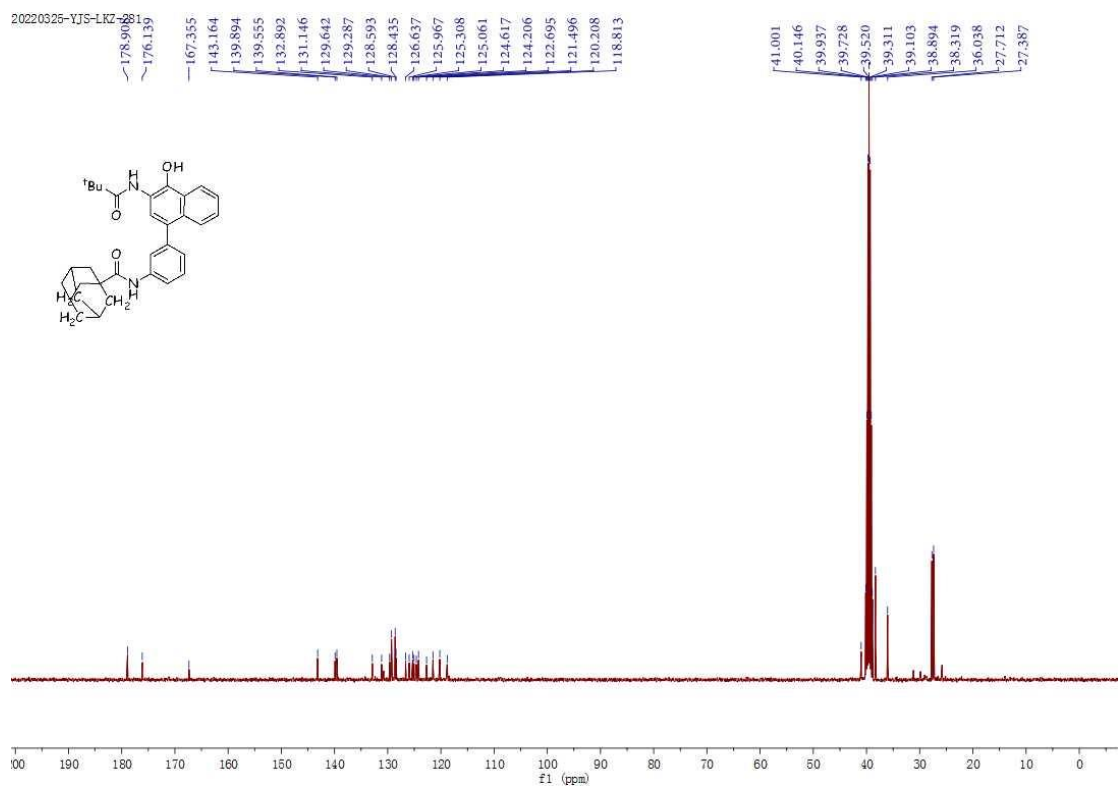

<sup>13</sup>C - NMR spectrum of compound – **3r** (101 MHz, DMSO-*d*<sub>6</sub>)

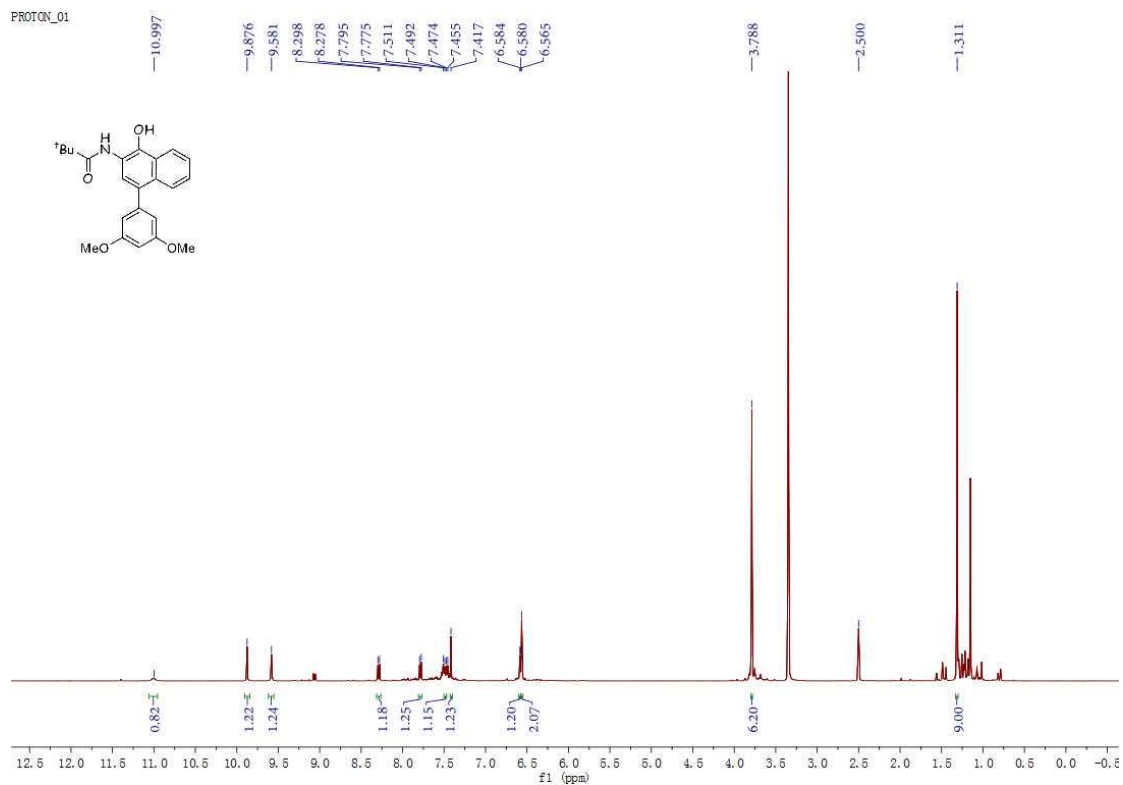

$^1\text{H}$  - NMR spectrum of compound - **3s** (400 MHz,  $\text{DMSO-}d_6$ )

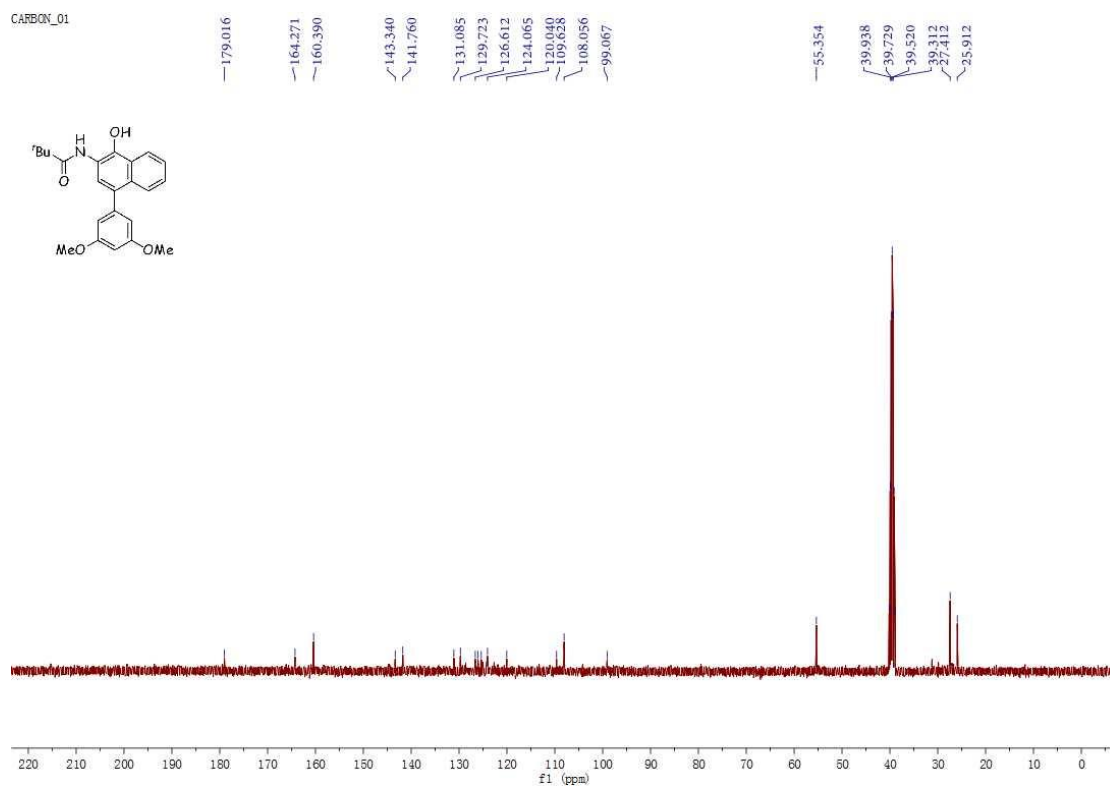

$^{13}\text{C}$  - NMR spectrum of compound - **3s** (101 MHz,  $\text{DMSO-}d_6$ )

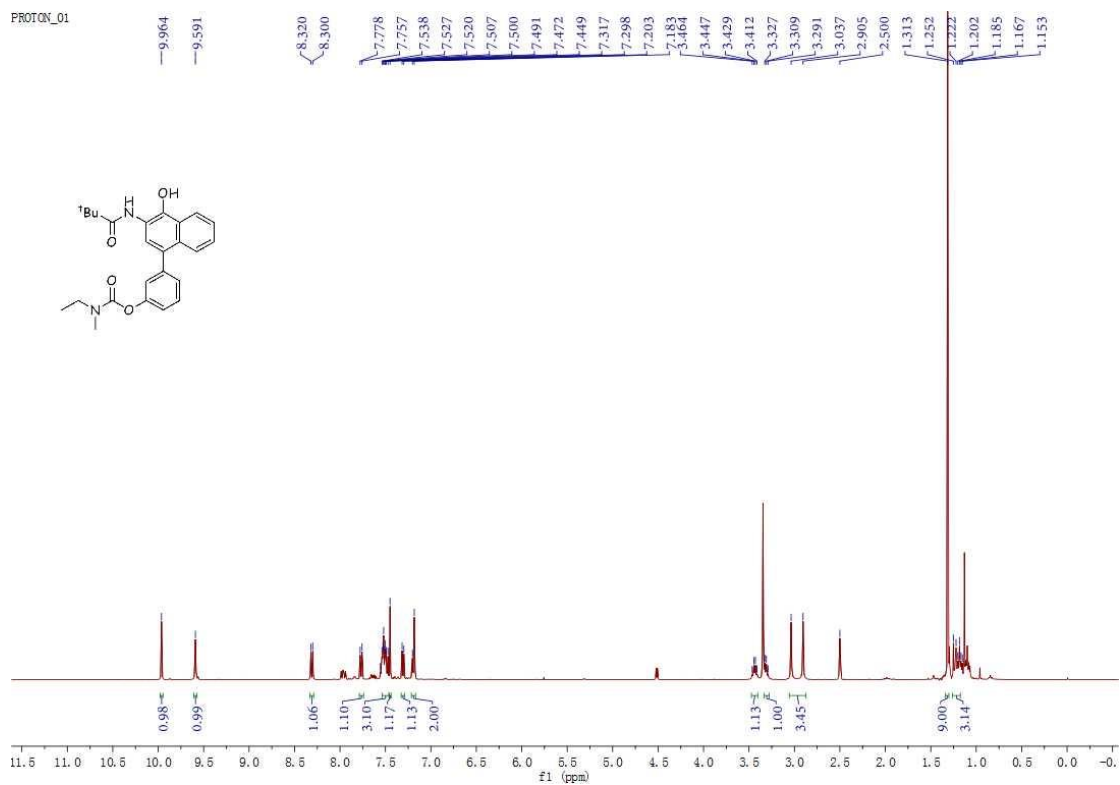

<sup>1</sup>H – NMR spectrum of compound – **3t** (400 MHz, DMSO-*d*<sub>6</sub>)

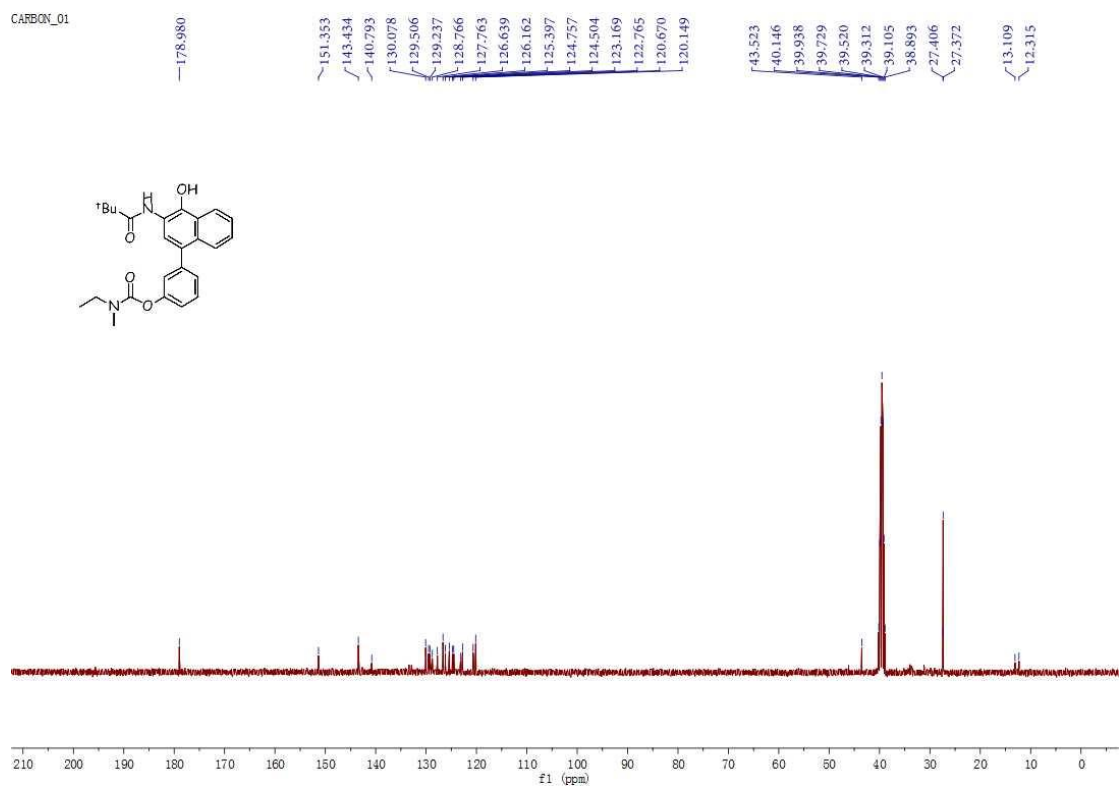

<sup>13</sup>C – NMR spectrum of compound – **3t** (101 MHz, DMSO-*d*<sub>6</sub>)



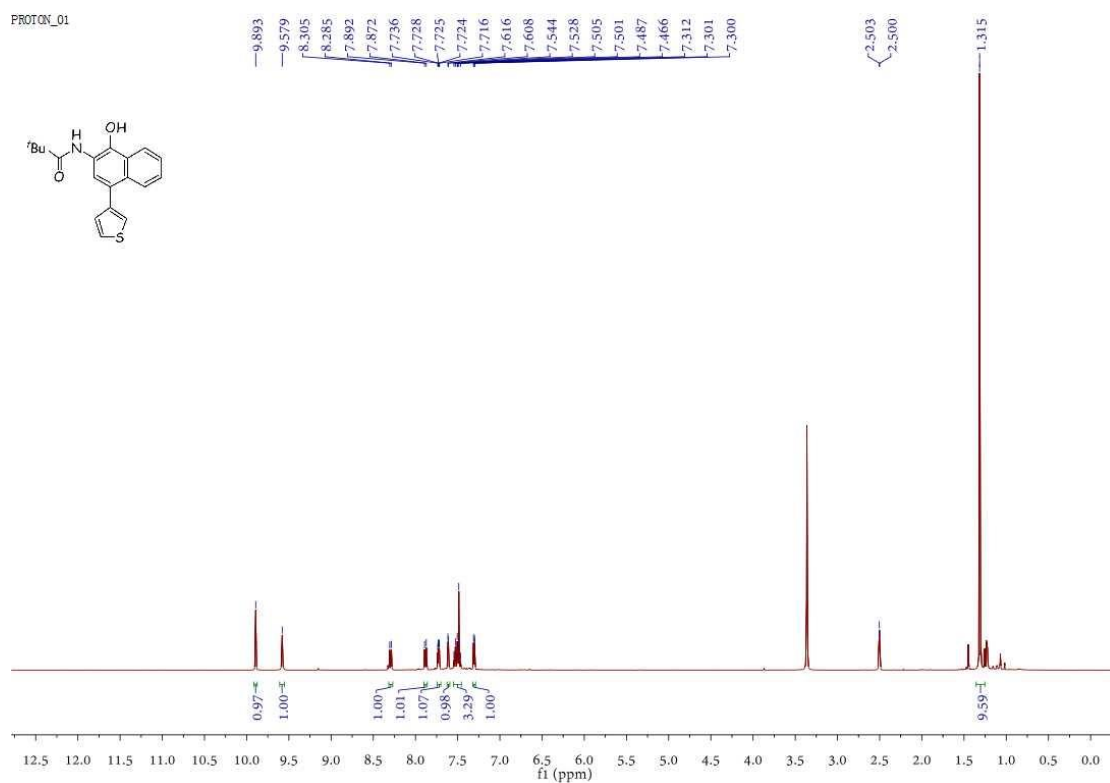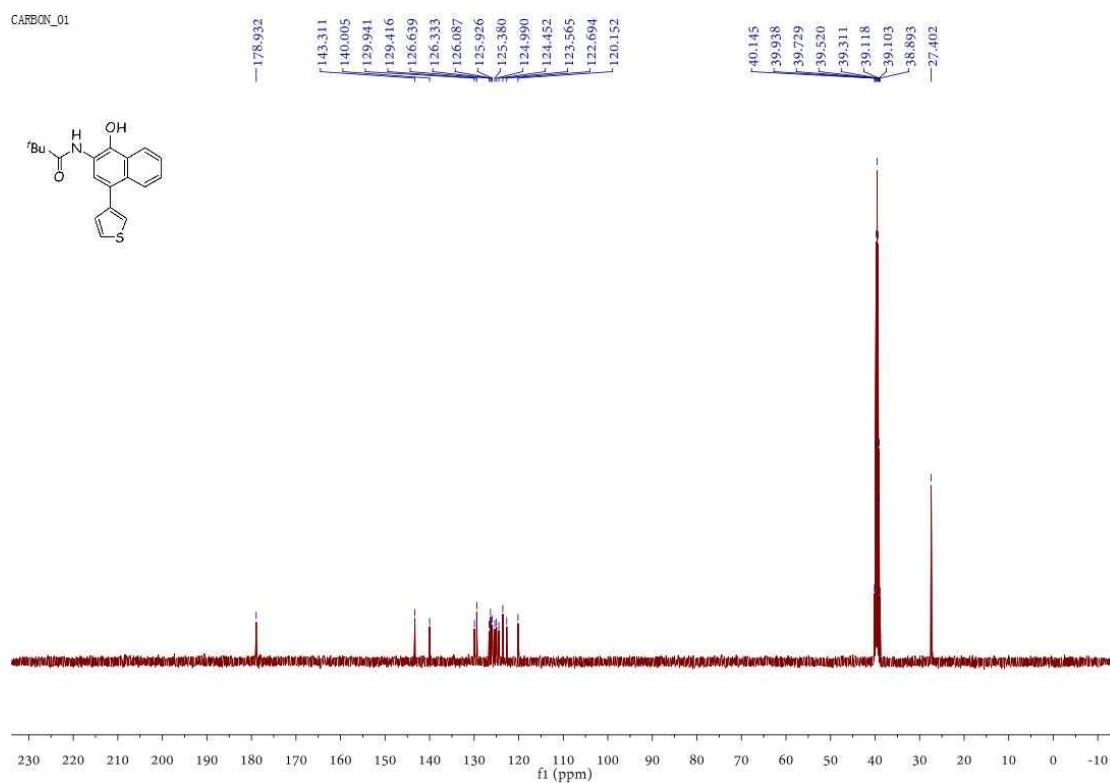

$^{13}\text{C}$  - NMR spectrum of compound - **3u** (101 MHz, DMSO- $d_6$ )

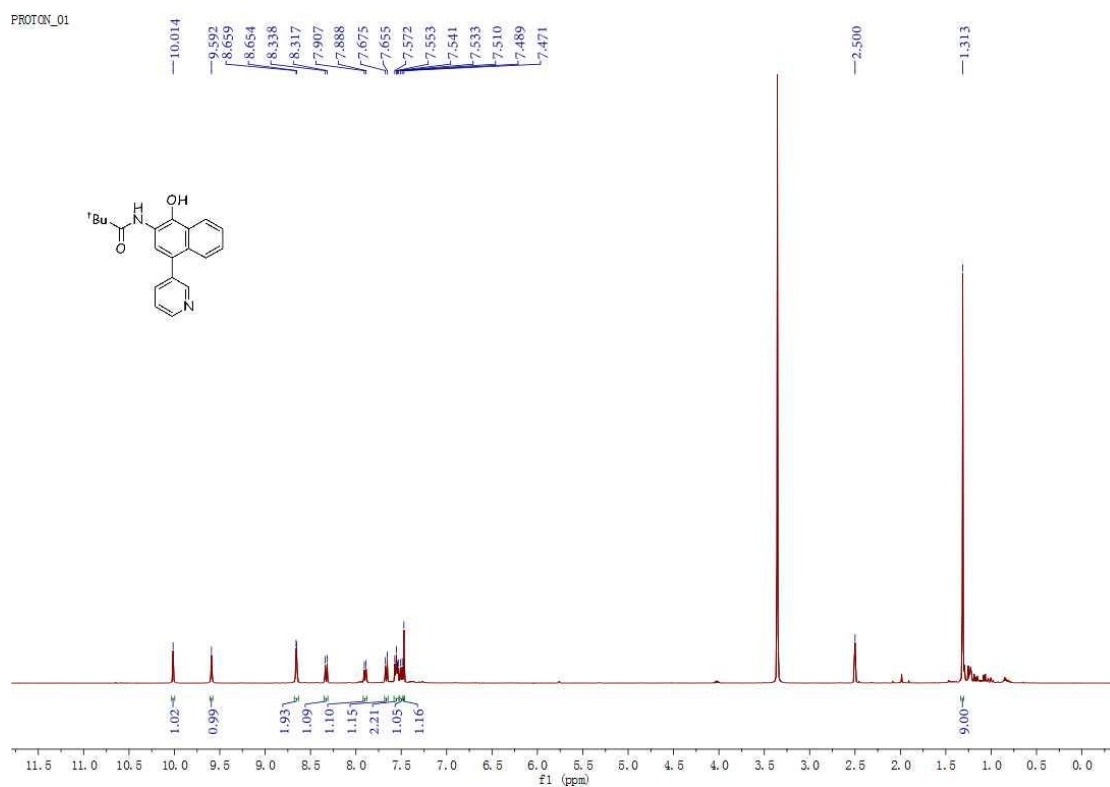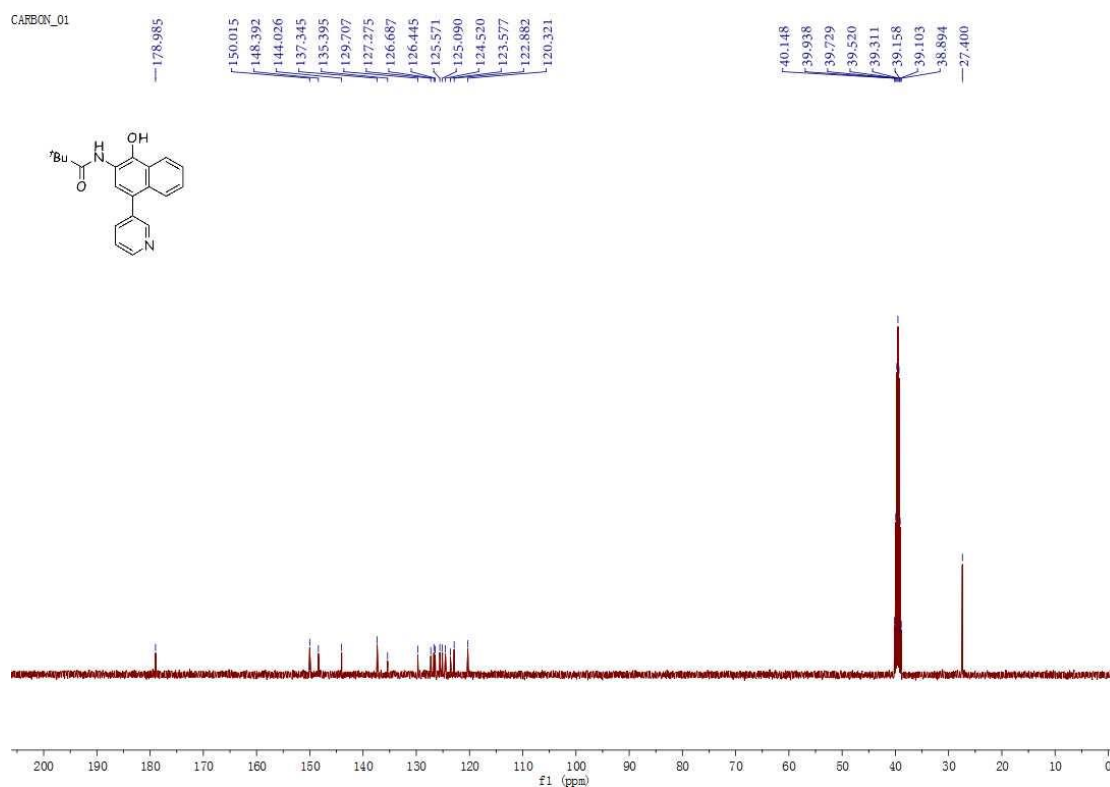

PROTON\_01

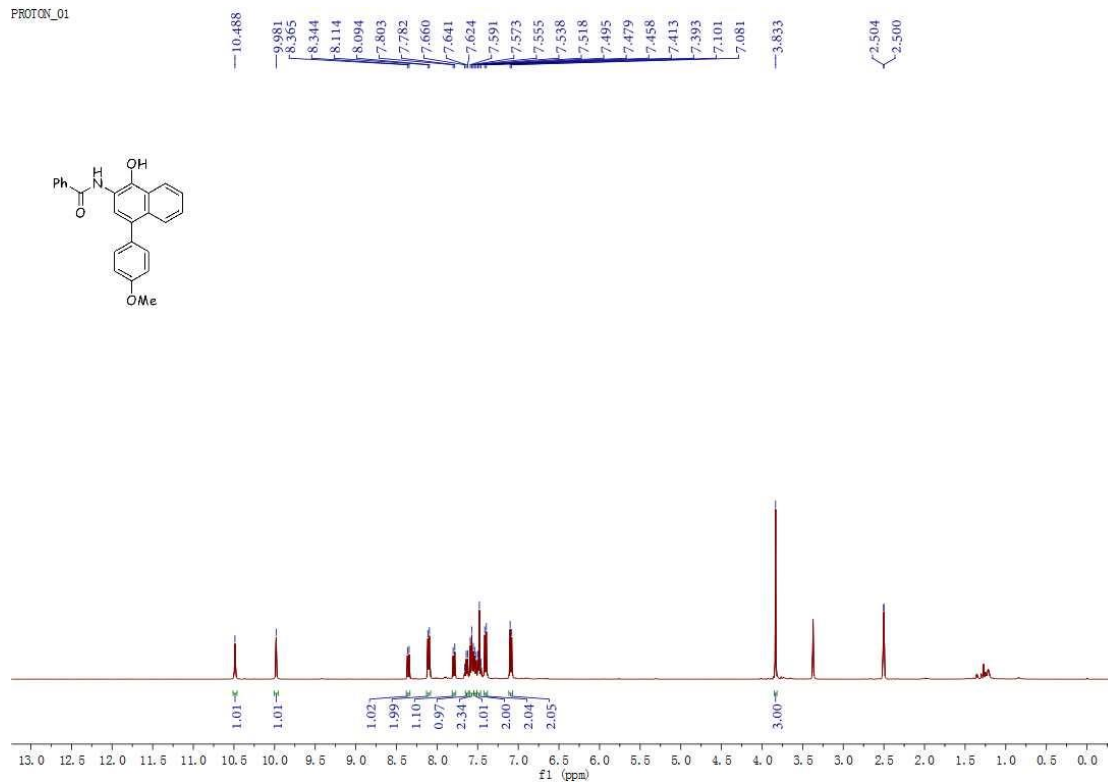

<sup>1</sup>H – NMR spectrum of compound – **4a** (400 MHz, DMSO-*d*<sub>6</sub>)

CARBON\_01

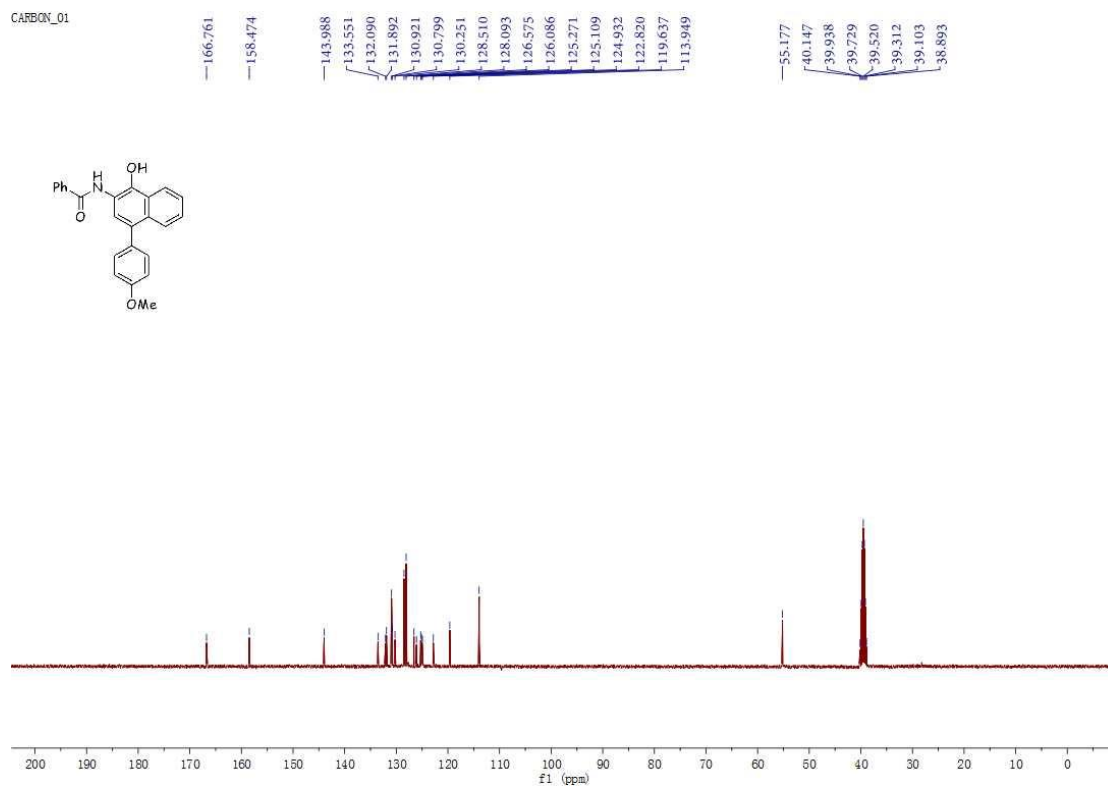

<sup>13</sup>C – NMR spectrum of compound – **4a** (101 MHz, DMSO-*d*<sub>6</sub>)

20220326-YJS-LKZ-223

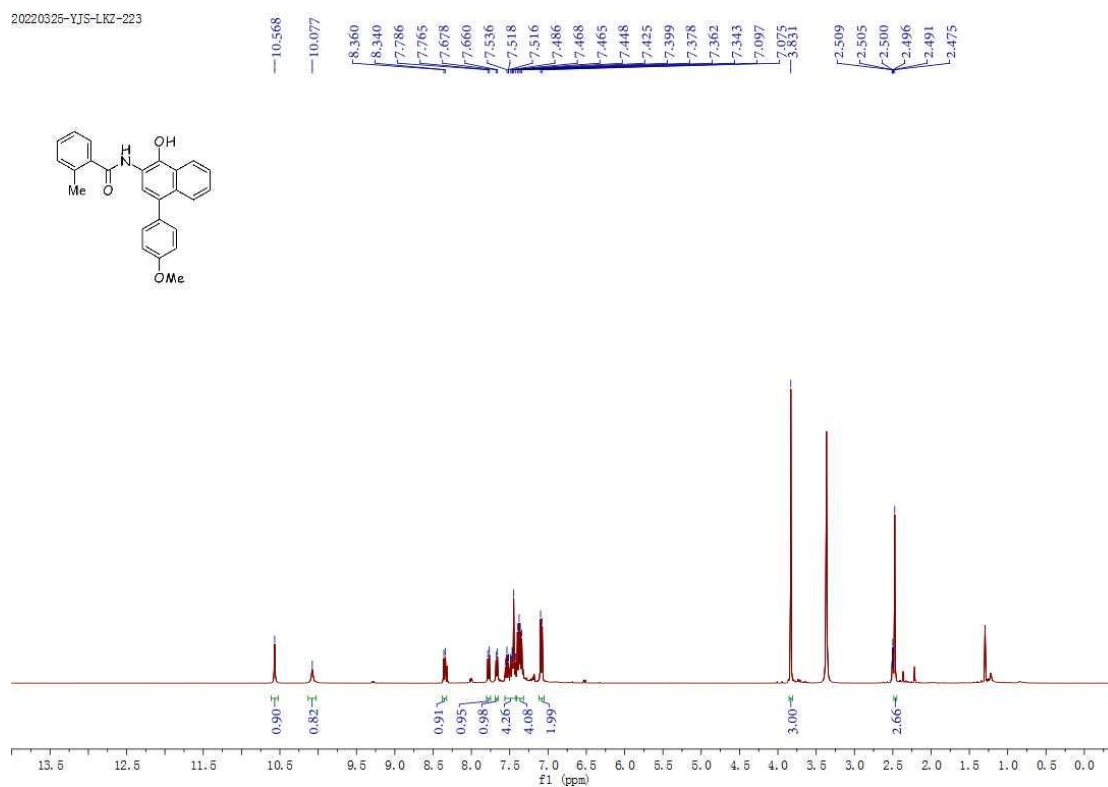

<sup>1</sup>H - NMR spectrum of compound - **4b** (400 MHz, DMSO-d<sub>6</sub>)

20220326-YJS-LKZ-223

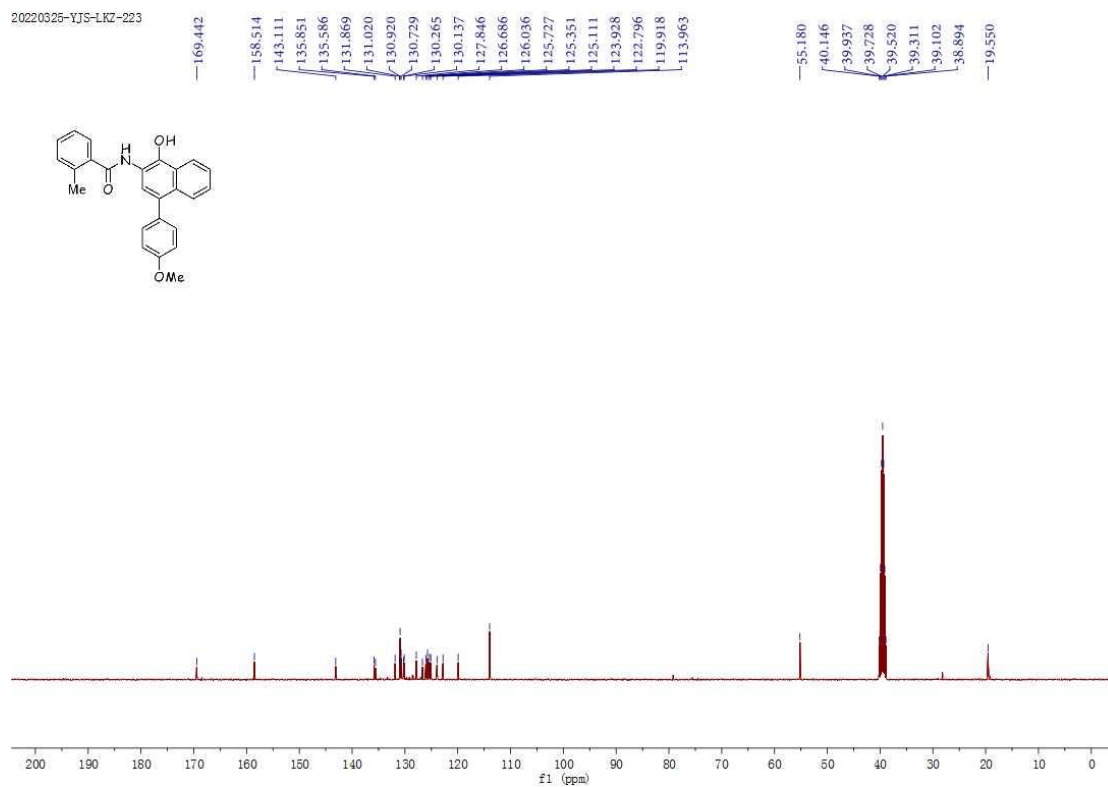

<sup>13</sup>C - NMR spectrum of compound - **4b** (101 MHz, DMSO-d<sub>6</sub>)

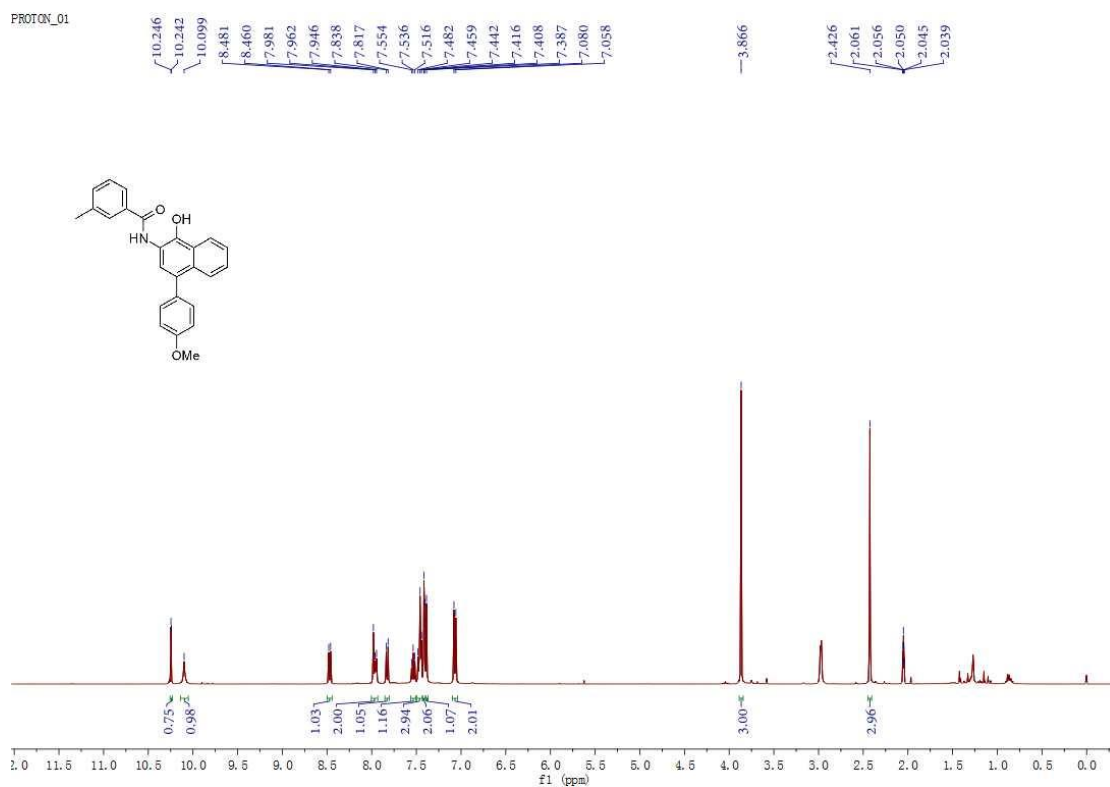

<sup>1</sup>H – NMR spectrum of compound – **4c** (400 MHz, acetone-*d*<sub>6</sub>)

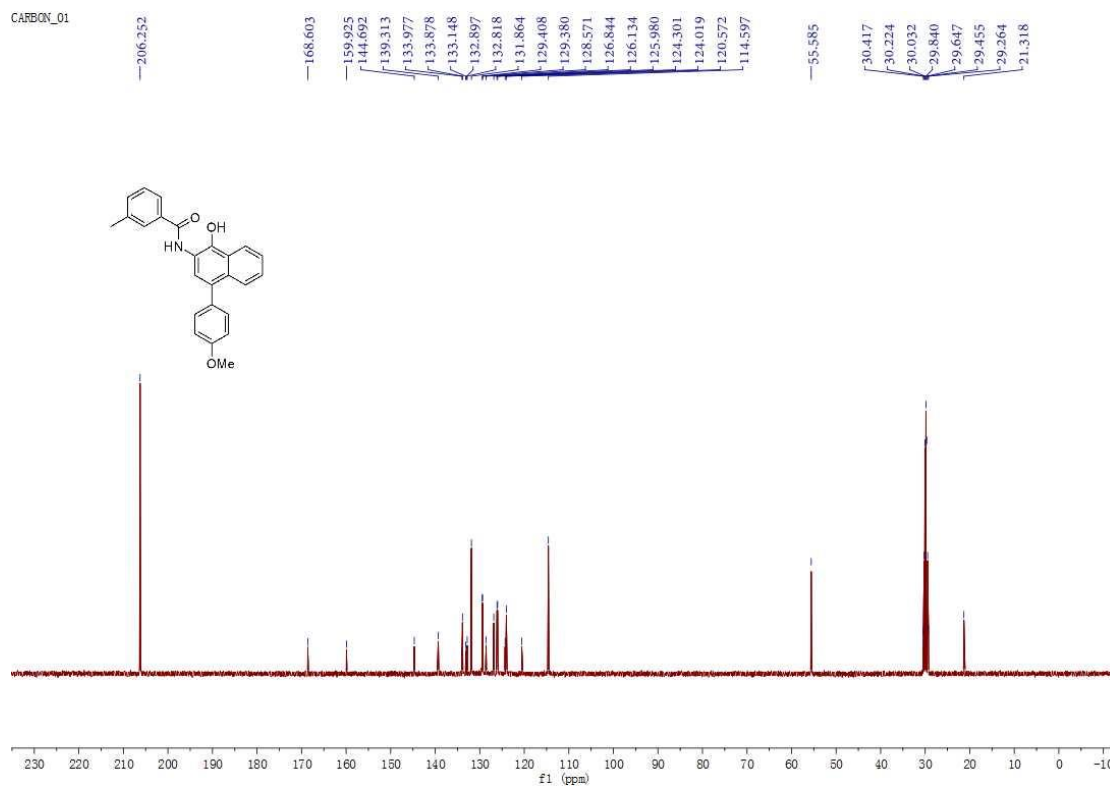

<sup>13</sup>C – NMR spectrum of compound – **4c** (101 MHz, acetone-*d*<sub>6</sub>)

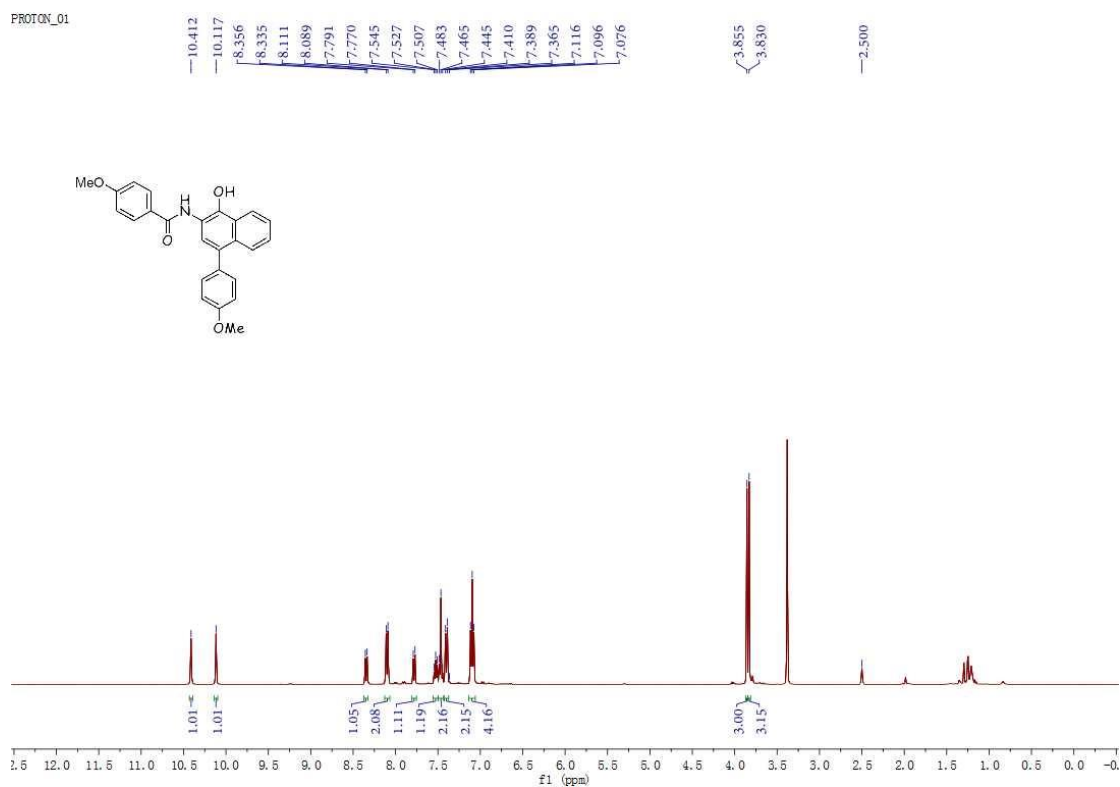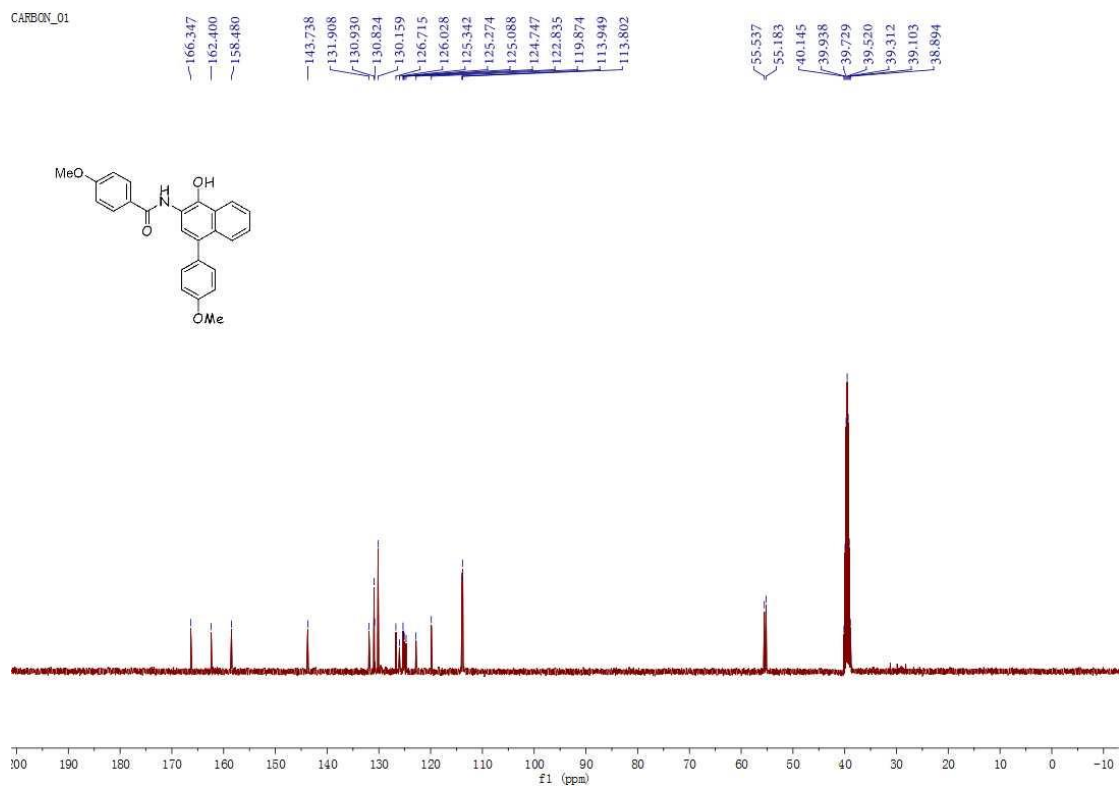

20220326-YJS-LKZ-228

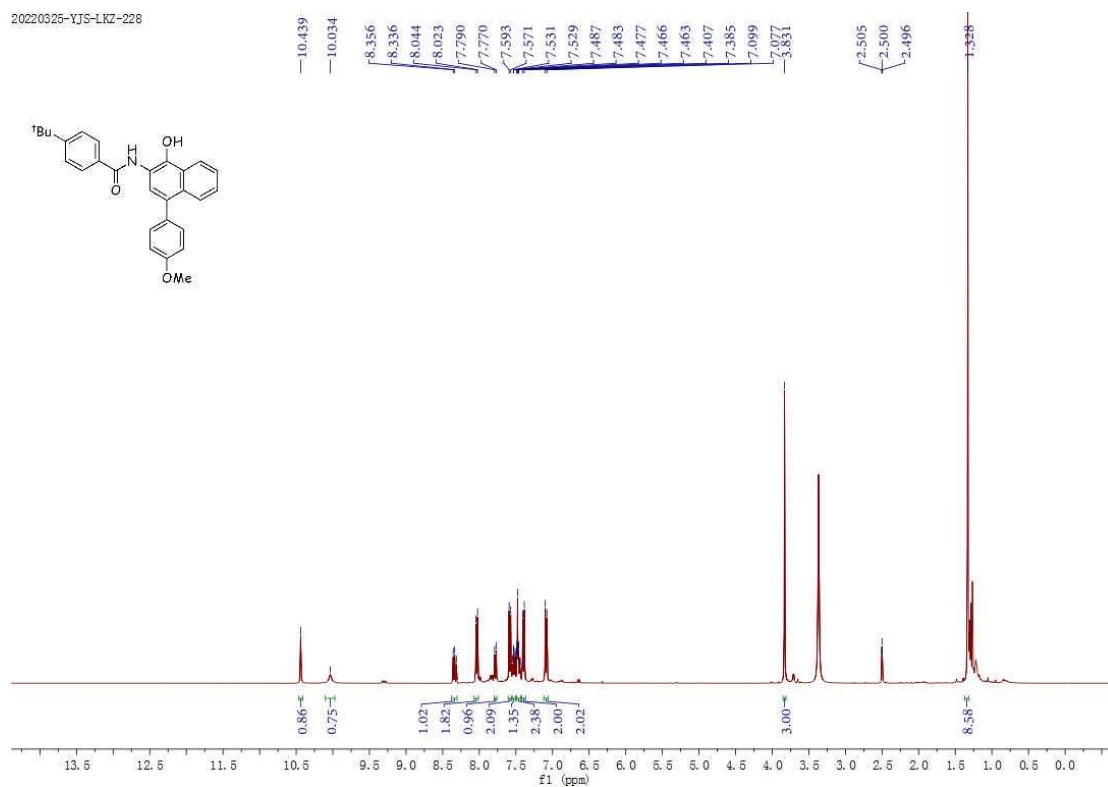

<sup>1</sup>H - NMR spectrum of compound **4e** (400 MHz, DMSO-*d*<sub>6</sub>)

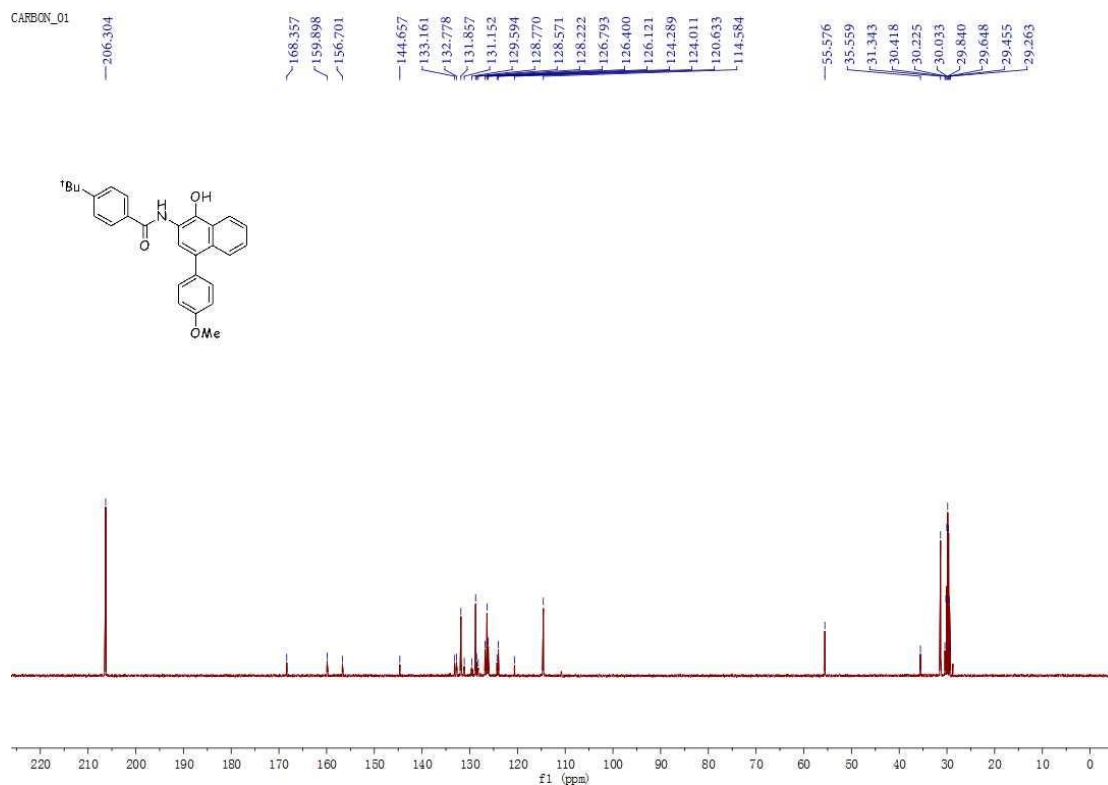

<sup>13</sup>C - NMR spectrum of compound **4e** (101 MHz, acetone-*d*<sub>6</sub>)

PROTON\_01

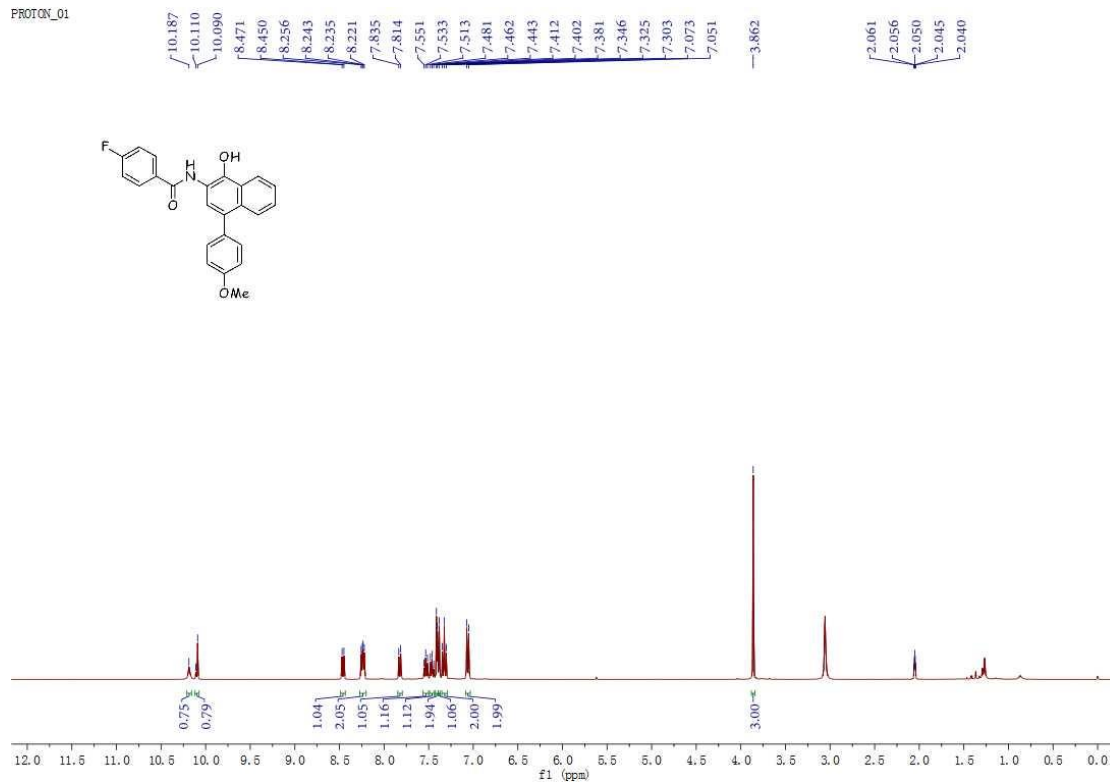

<sup>1</sup>H - NMR spectrum of compound - **4f** (400 MHz, acetone-d<sub>6</sub>)

CARBON\_01

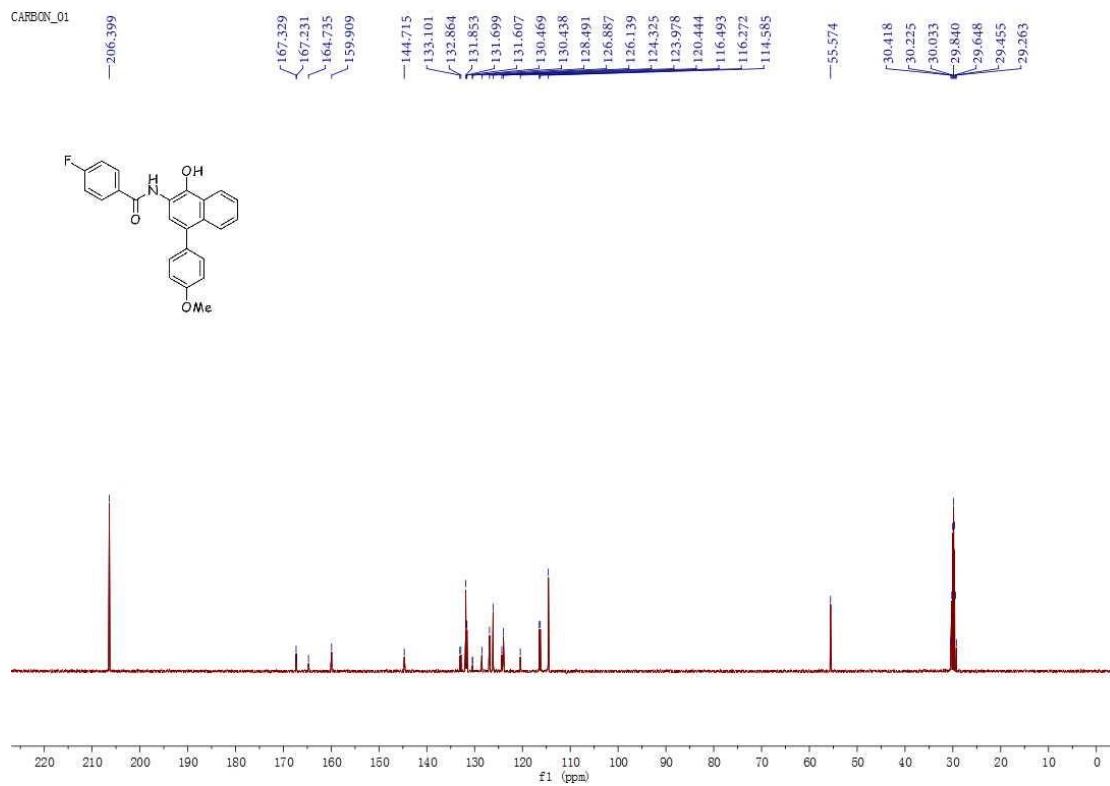

<sup>13</sup>C - NMR spectrum of compound - **4f** (101 MHz, acetone-d<sub>6</sub>)



FLUORINE\_01

-108.716

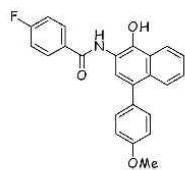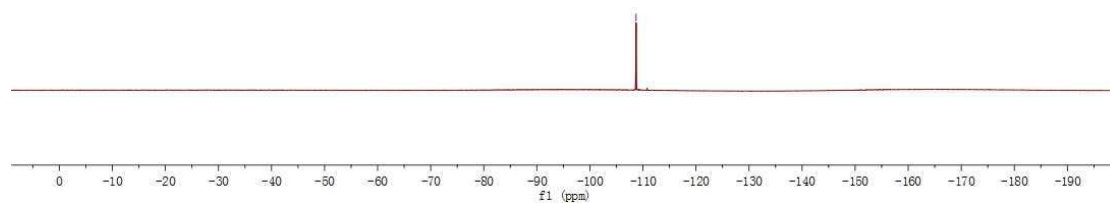

$^{19}\text{F}$  - NMR spectrum of compound - **4f** (376 MHz, acetone- $d_6$ )

PROTON\_01

10.465  
9.870  
8.351  
8.331  
8.121  
8.100  
7.795  
7.774  
7.646  
7.625  
7.546  
7.528  
7.508  
7.488  
7.468  
7.442  
7.399  
7.379  
7.090  
7.069  
3.825  
2.500  
2.497

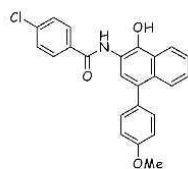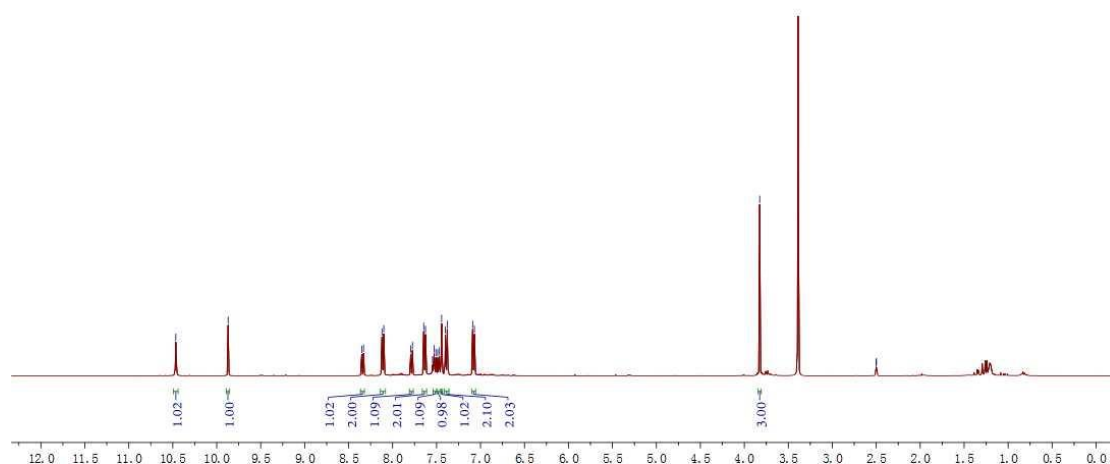

$^1\text{H}$  - NMR spectrum of compound - **4g** (400 MHz, DMSO- $d_6$ )

CARBON\_01

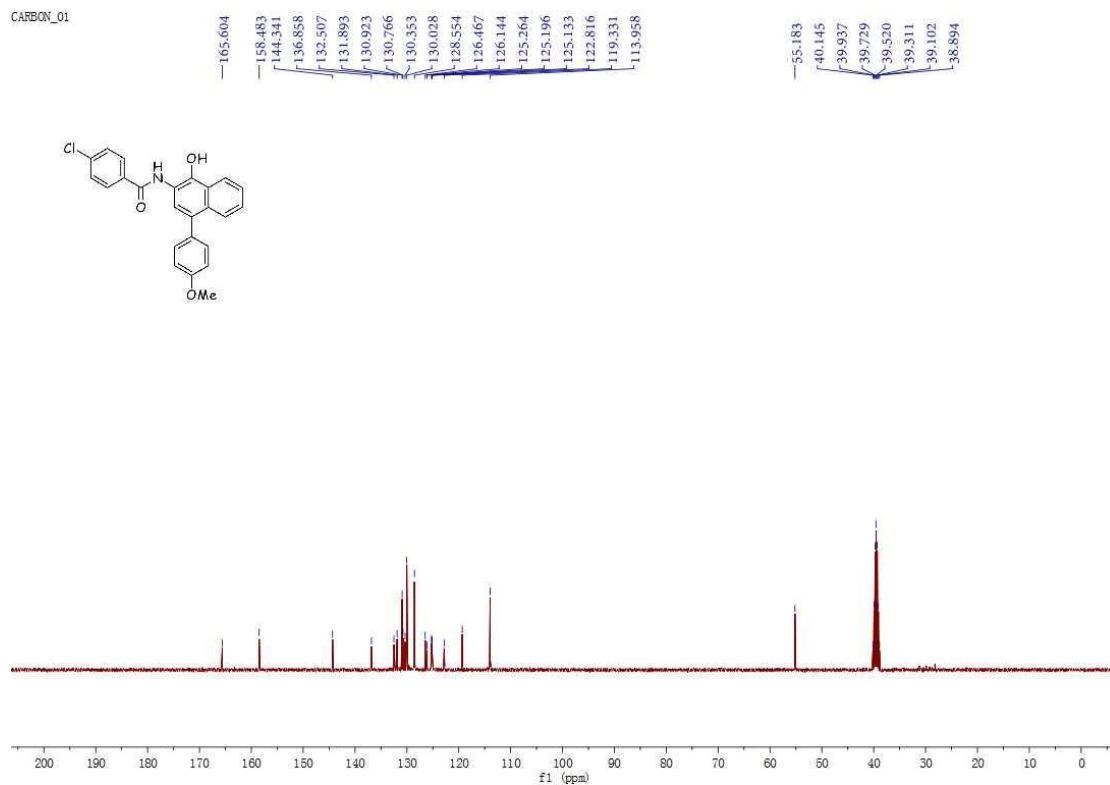

<sup>13</sup>C – NMR spectrum of compound – **4g** (101 MHz, DMSO-*d*<sub>6</sub>)

20220326-YJS-LKZ-244

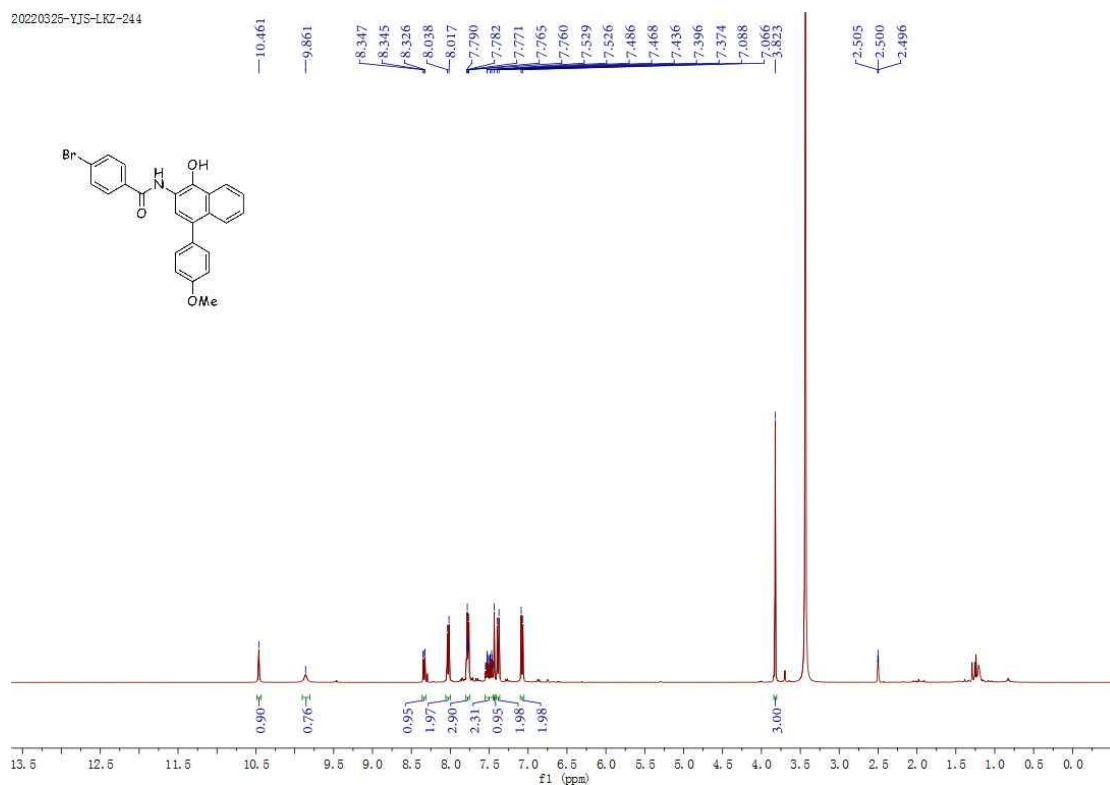

<sup>1</sup>H – NMR spectrum of compound – **4h** (400 MHz, DMSO-*d*<sub>6</sub>)

CARBON\_01

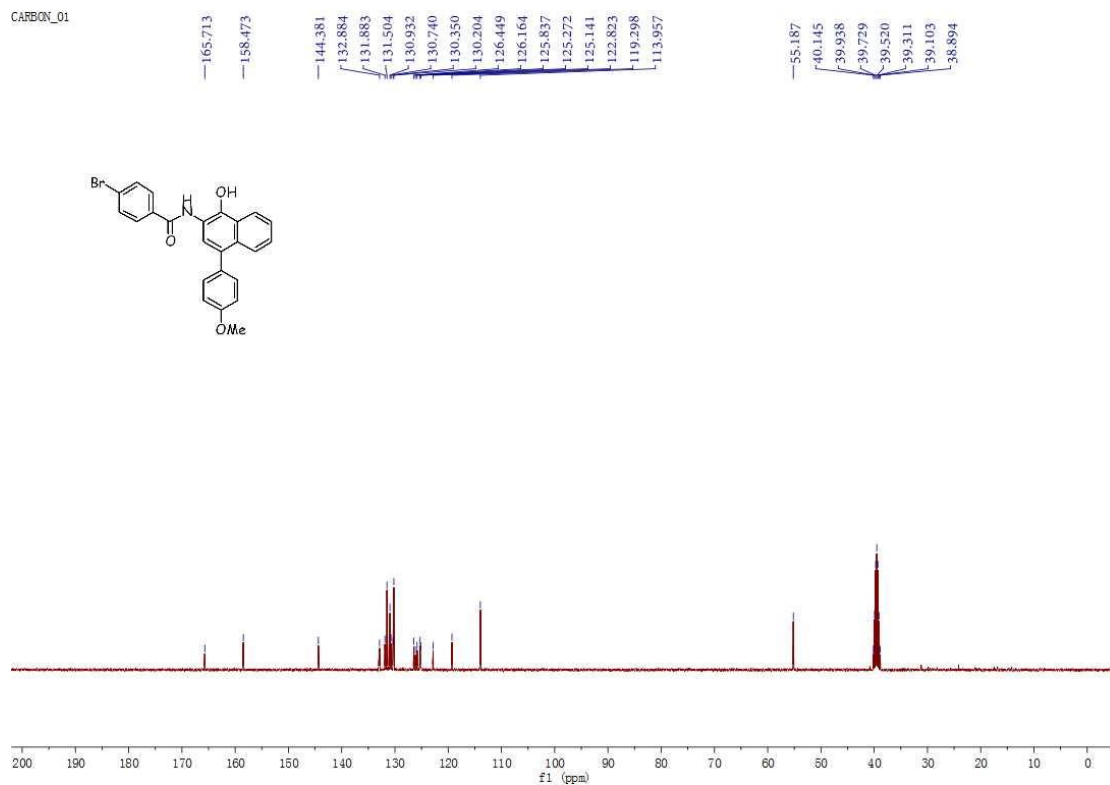

<sup>13</sup>C – NMR spectrum of compound – **4h** (101 MHz, DMSO-*d*<sub>6</sub>)

PROTON\_01

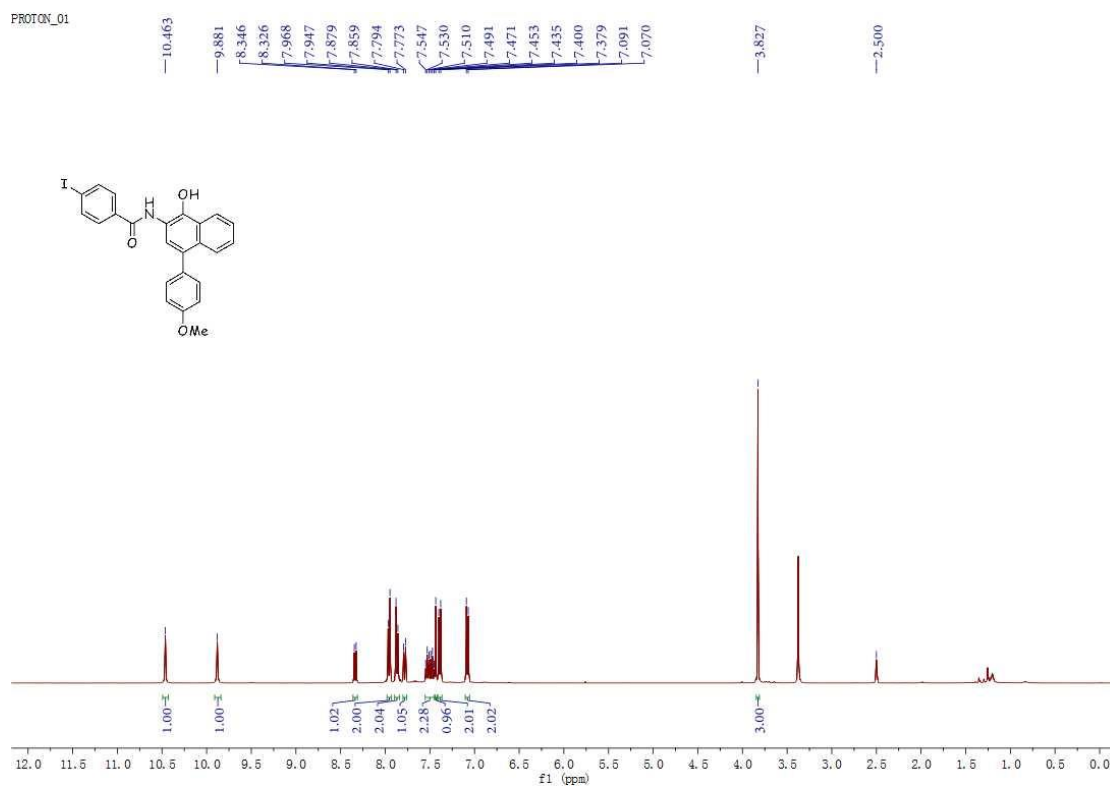

<sup>1</sup>H – NMR spectrum of compound – **4i** (400 MHz, DMSO-*d*<sub>6</sub>)

CARBON\_01

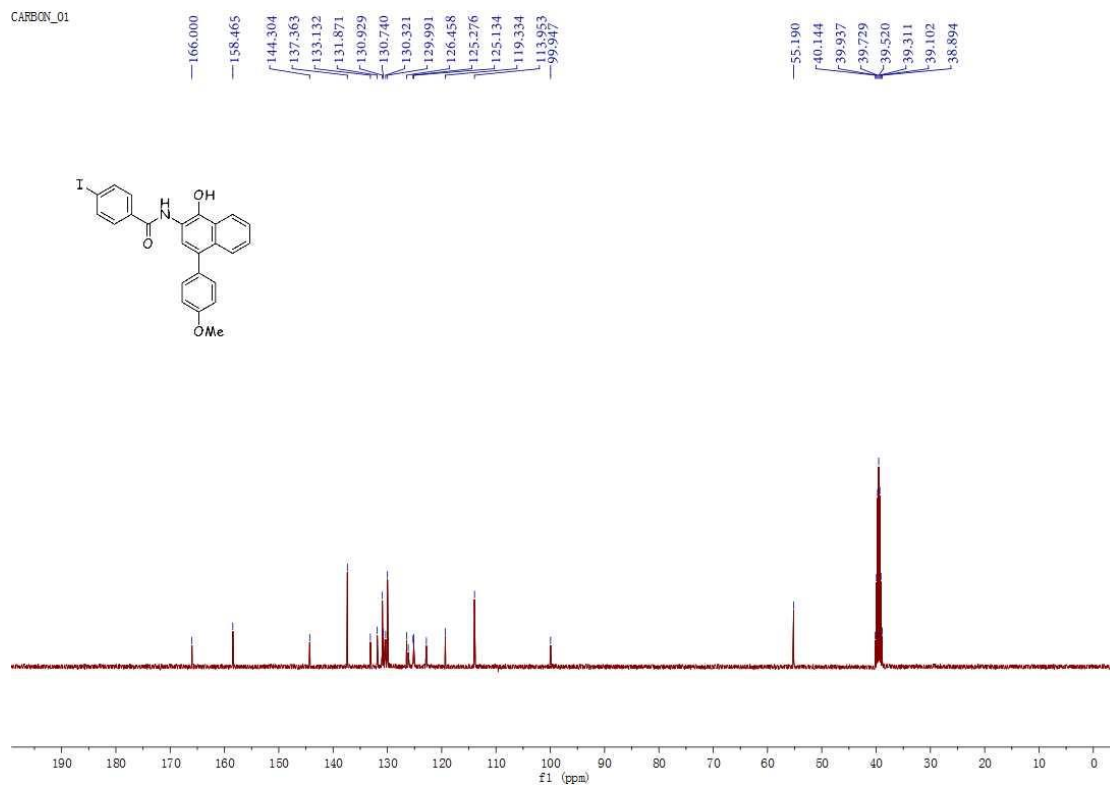

<sup>13</sup>C – NMR spectrum of compound – **4i** (101 MHz, DMSO-*d*<sub>6</sub>)

20220326-YJS-LKZ-262

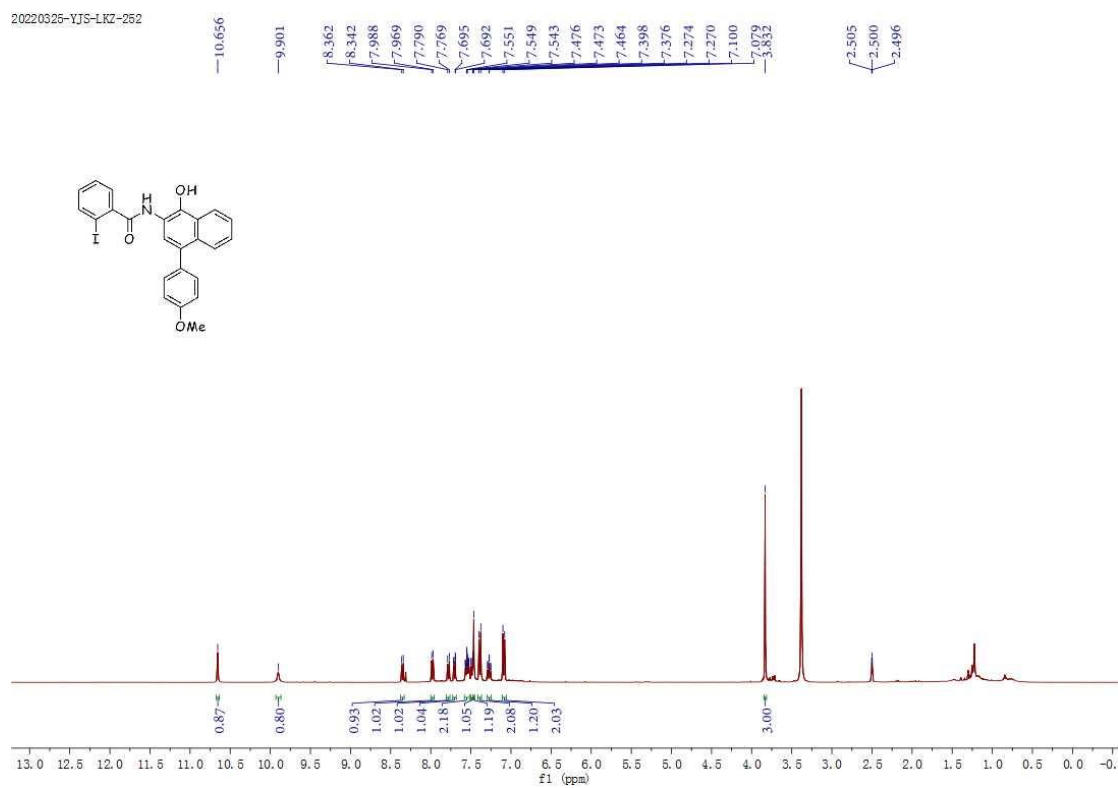

<sup>1</sup>H – NMR spectrum of compound – **4j** (400 MHz, DMSO-*d*<sub>6</sub>)

CARBON\_01

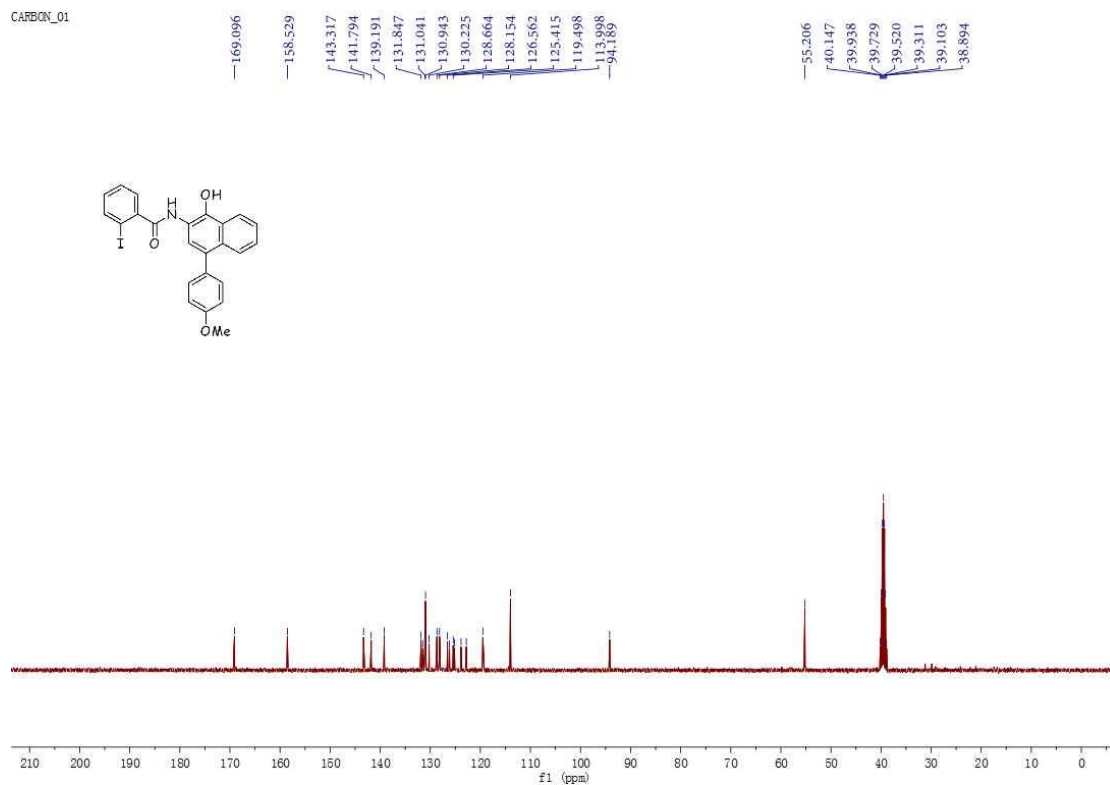

<sup>13</sup>C – NMR spectrum of compound – **4j** (101 MHz, DMSO-*d*<sub>6</sub>)

PROTON\_01

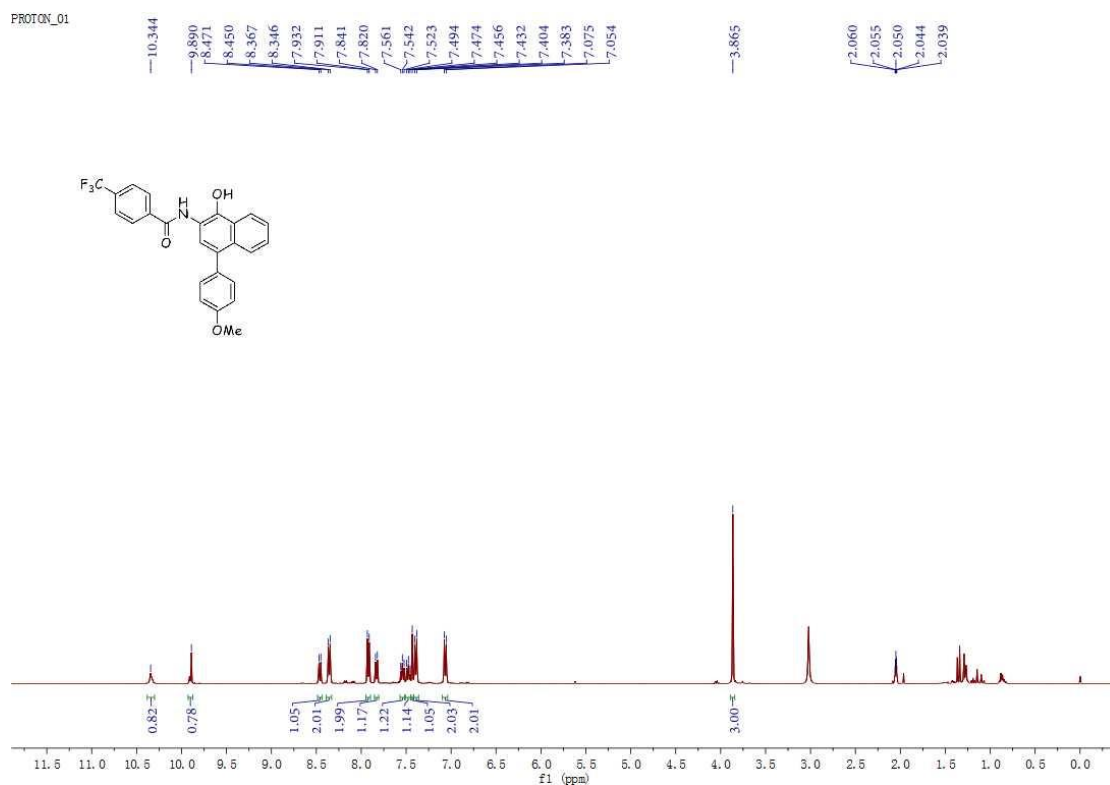

<sup>1</sup>H – NMR spectrum of compound – **4k** (400 MHz, acetone-*d*<sub>6</sub>)

CARBON\_01

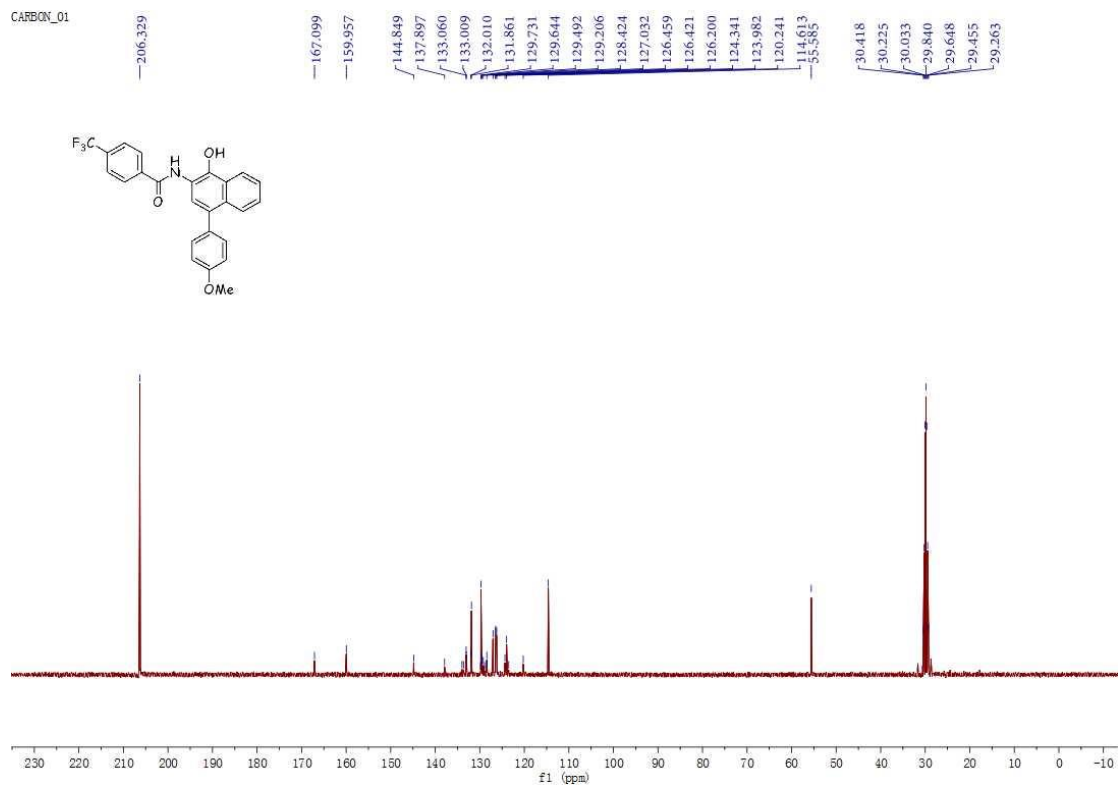

<sup>13</sup>C – NMR spectrum of compound – **4k** (101 MHz, acetone-*d*<sub>6</sub>)

FLUORINE\_01

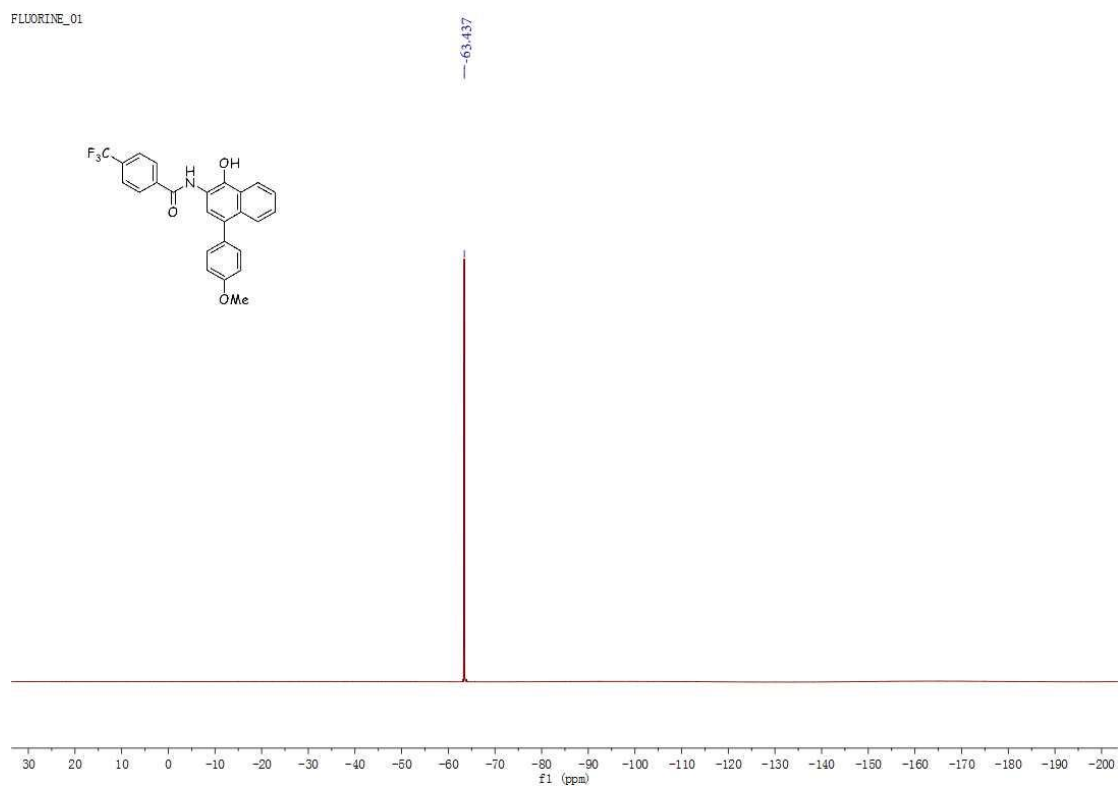

<sup>19</sup>F – NMR spectrum of compound – **4k** (376 MHz, acetone-*d*<sub>6</sub>)

PROTON\_01

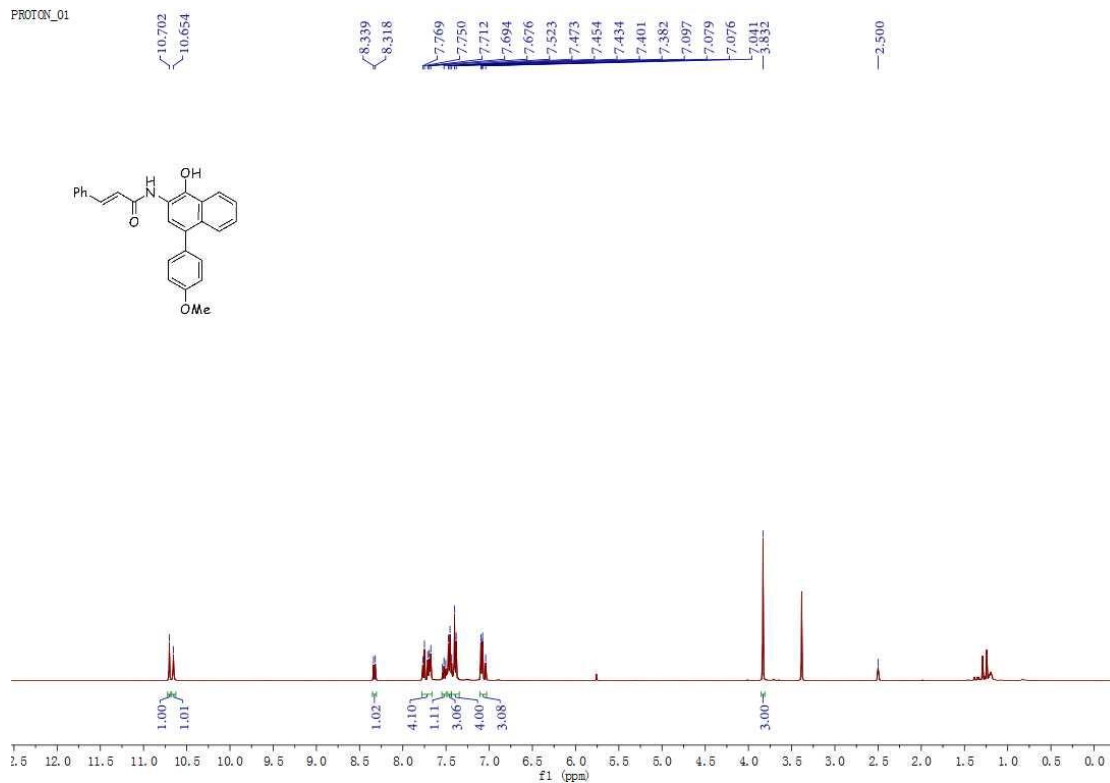

<sup>1</sup>H - NMR spectrum of compound - **4l** (400 MHz, DMSO-*d*<sub>6</sub>)

CARBON\_01

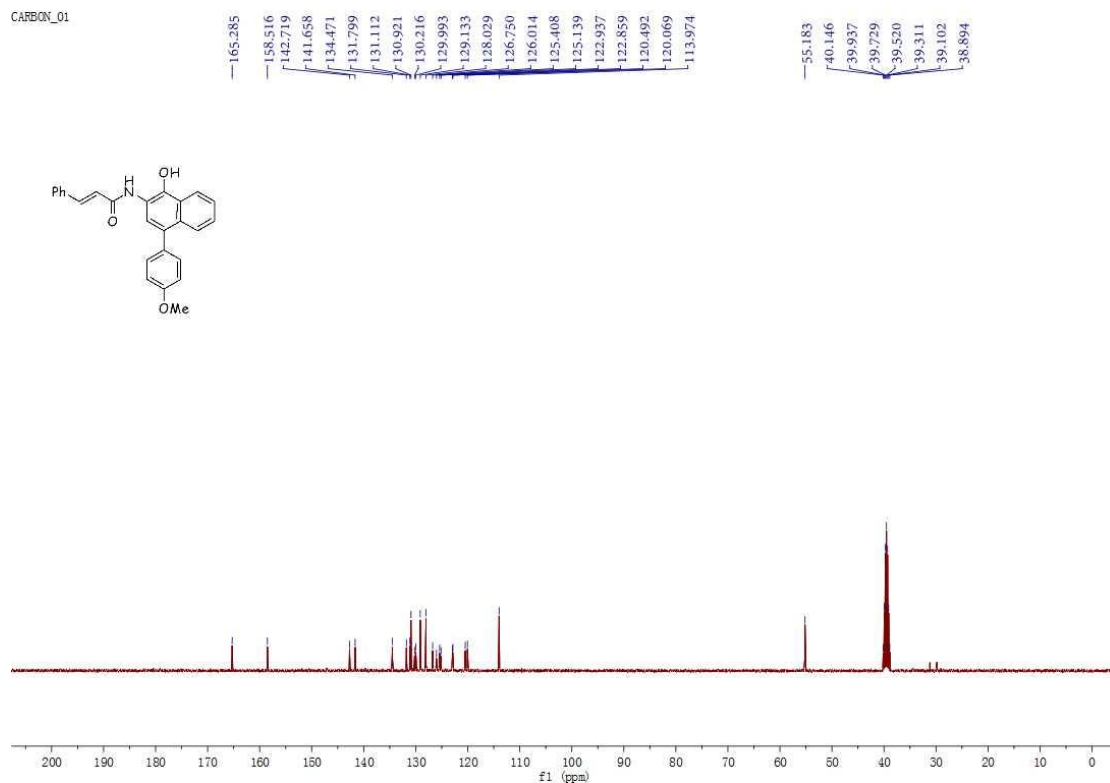

<sup>13</sup>C - NMR spectrum of compound - **4l** (101 MHz, DMSO-*d*<sub>6</sub>)

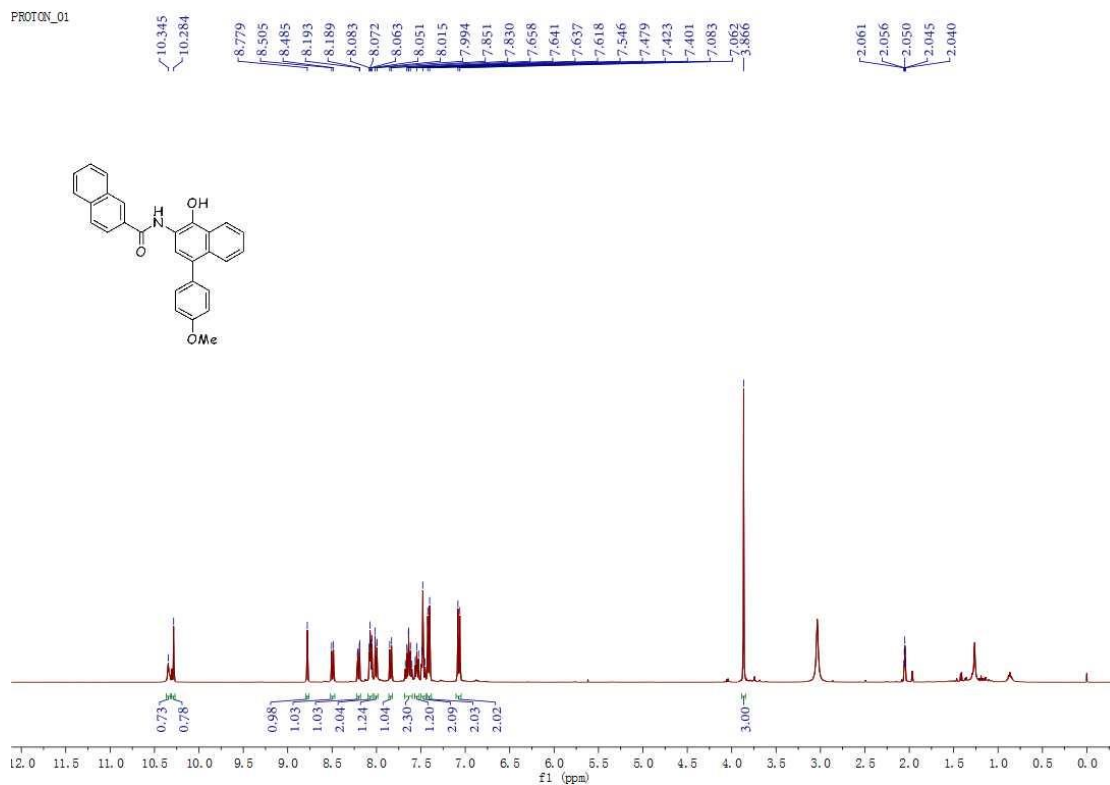

$^1\text{H}$  - NMR spectrum of compound - **4m** (400 MHz, acetone- $d_6$ )

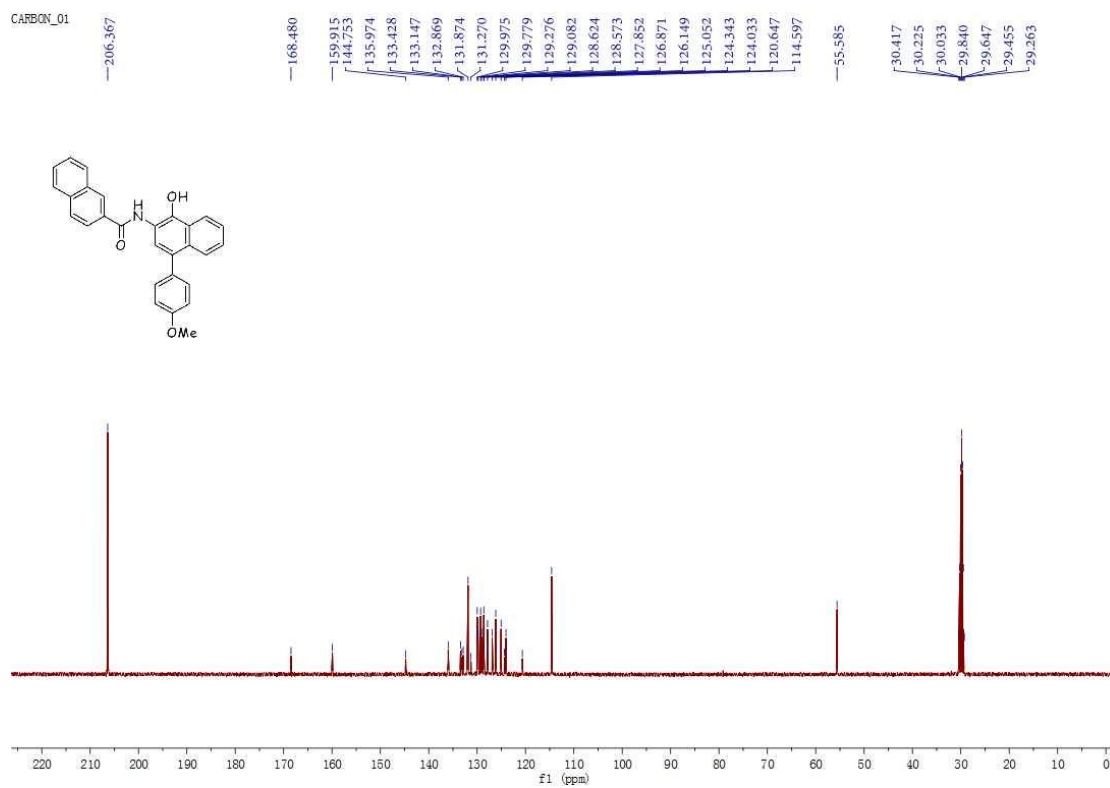

$^{13}\text{C}$  - NMR spectrum of compound - **4m** (101 MHz, acetone- $d_6$ )



PROTON\_01

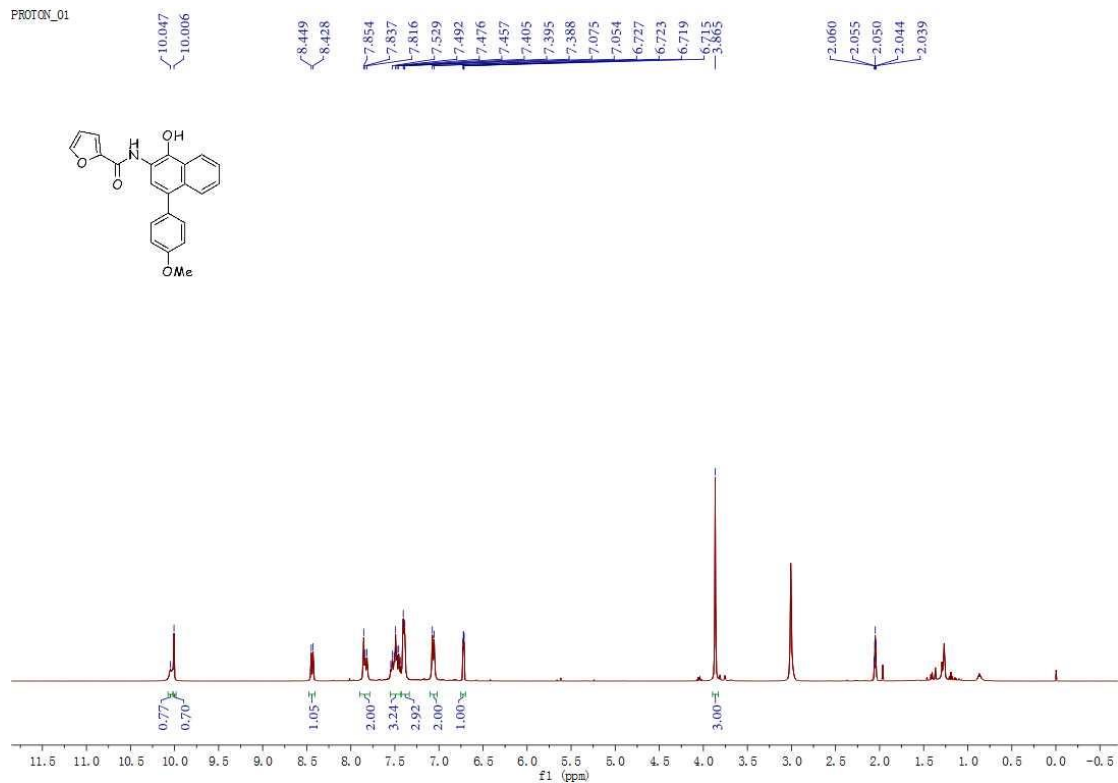

<sup>1</sup>H – NMR spectrum of compound – **4n** (400 MHz, acetone-d<sub>6</sub>)

CARBON\_01

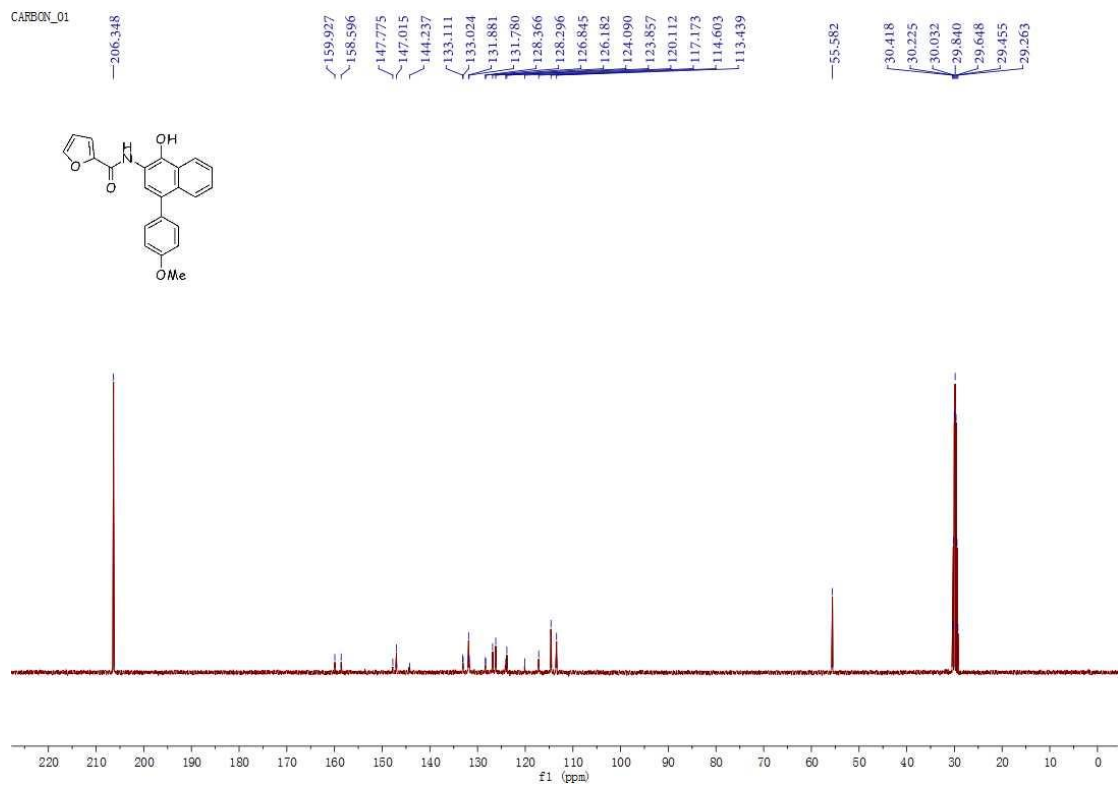

<sup>13</sup>C – NMR spectrum of compound – **4n** (101 MHz, acetone-d<sub>6</sub>)

20221125RJ-6

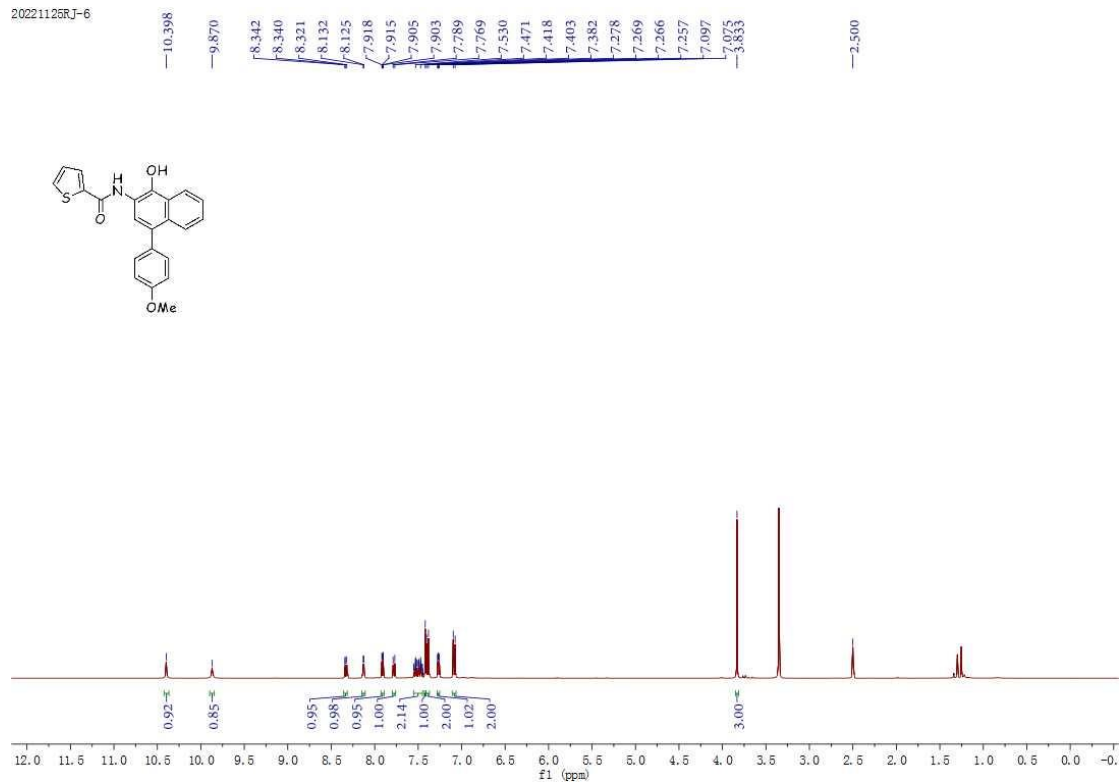

<sup>1</sup>H – NMR spectrum of compound – 40 (400 MHz, DMSO-*d*<sub>6</sub>)

20221125RJ-6

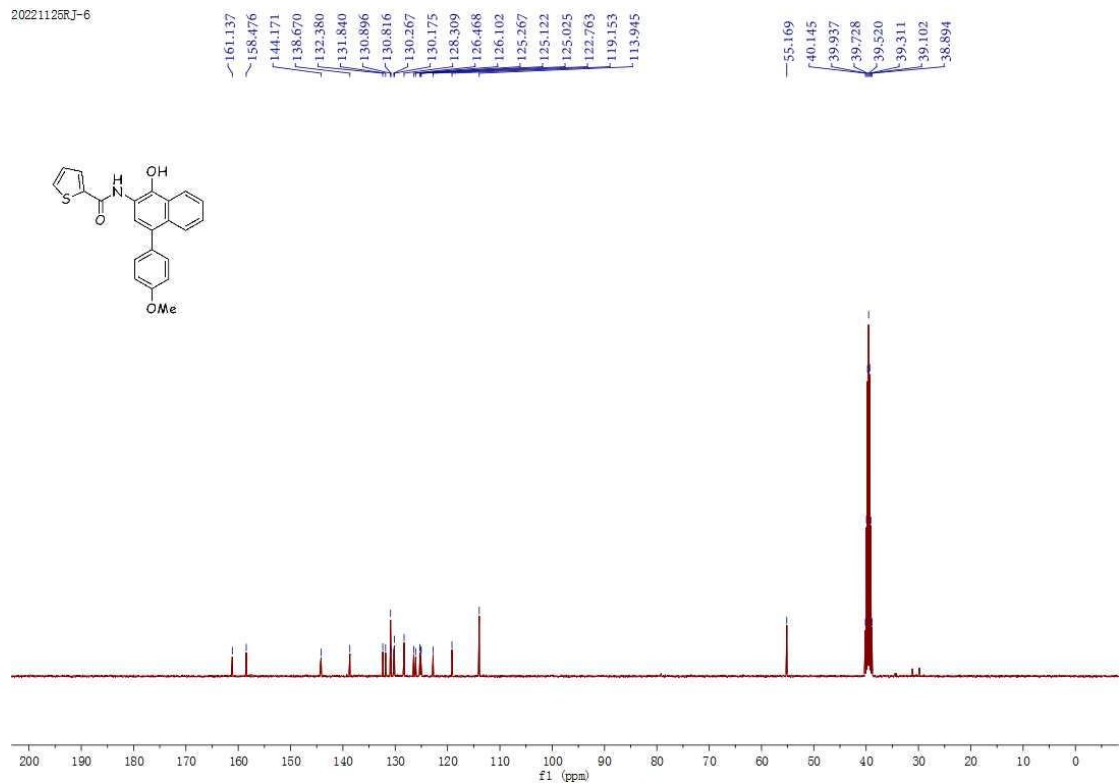

<sup>13</sup>C – NMR spectrum of compound – 40 (101 MHz, DMSO-*d*<sub>6</sub>)

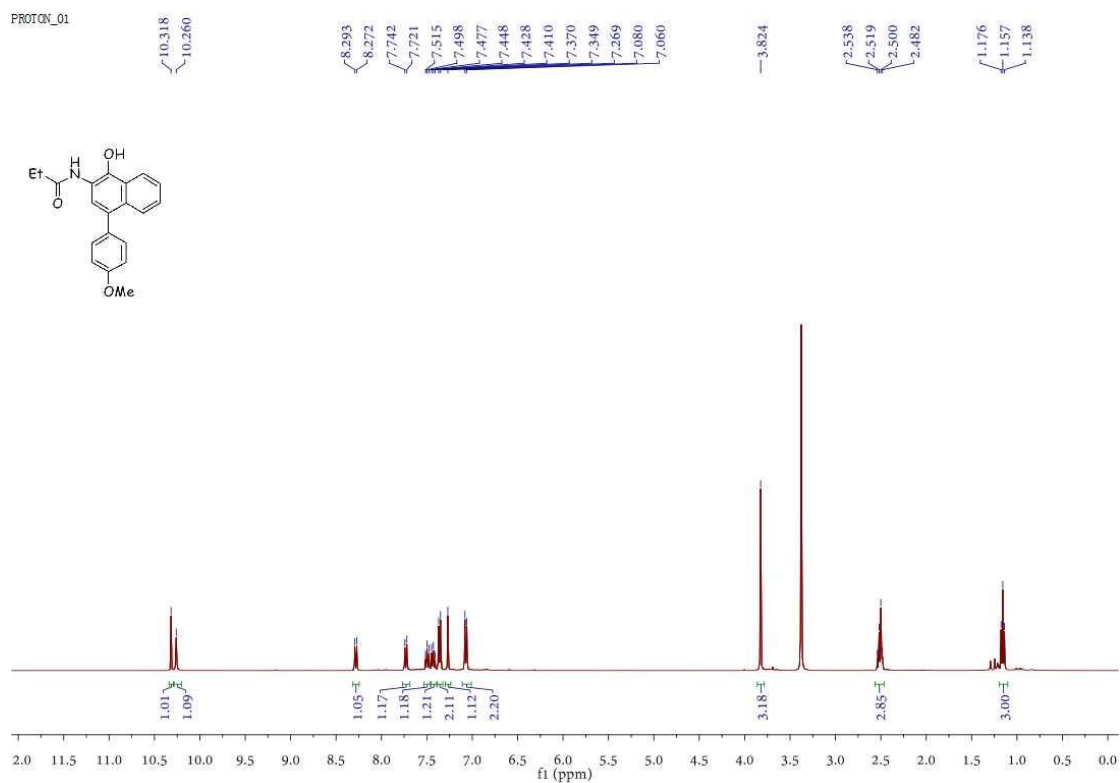

$^1\text{H}$  - NMR spectrum of compound - **4p** (400 MHz, DMSO- $d_6$ )

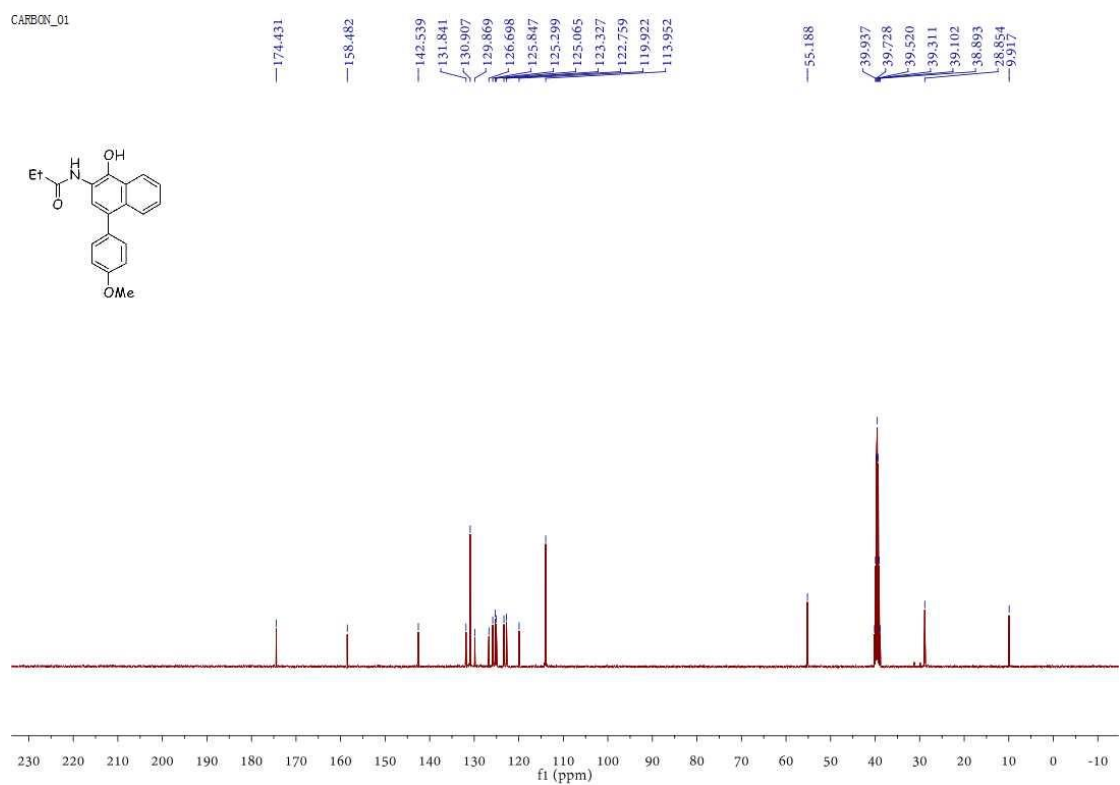

$^{13}\text{C}$  - NMR spectrum of compound - **4p** (101 MHz, DMSO- $d_6$ )

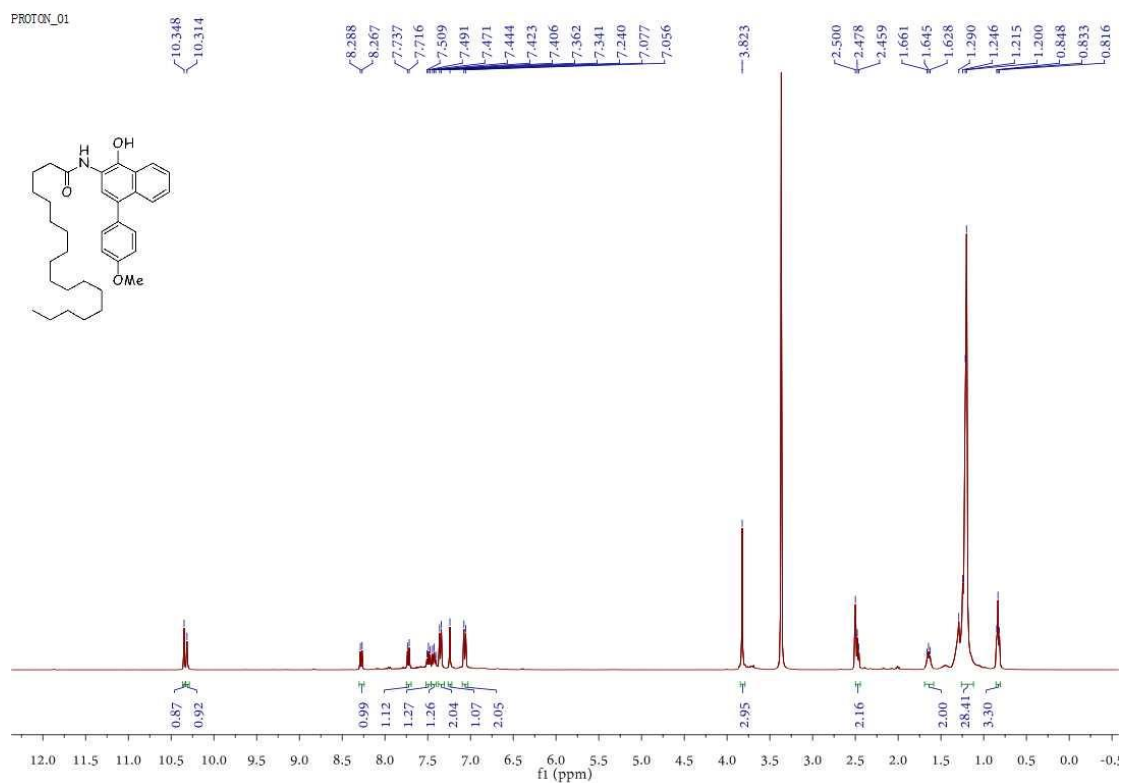

$^1\text{H}$  - NMR spectrum of compound - **4q** (400 MHz, DMSO- $d_6$ )

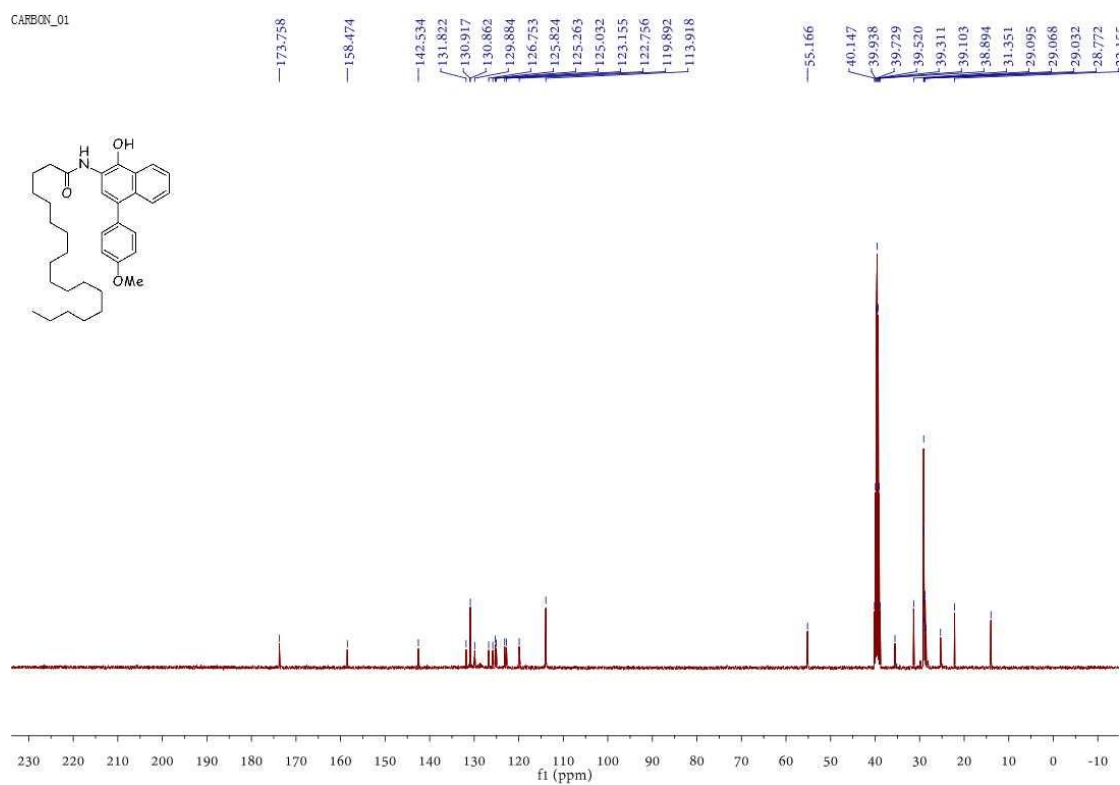

$^{13}\text{C}$  - NMR spectrum of compound - **4q** (101 MHz, DMSO- $d_6$ )

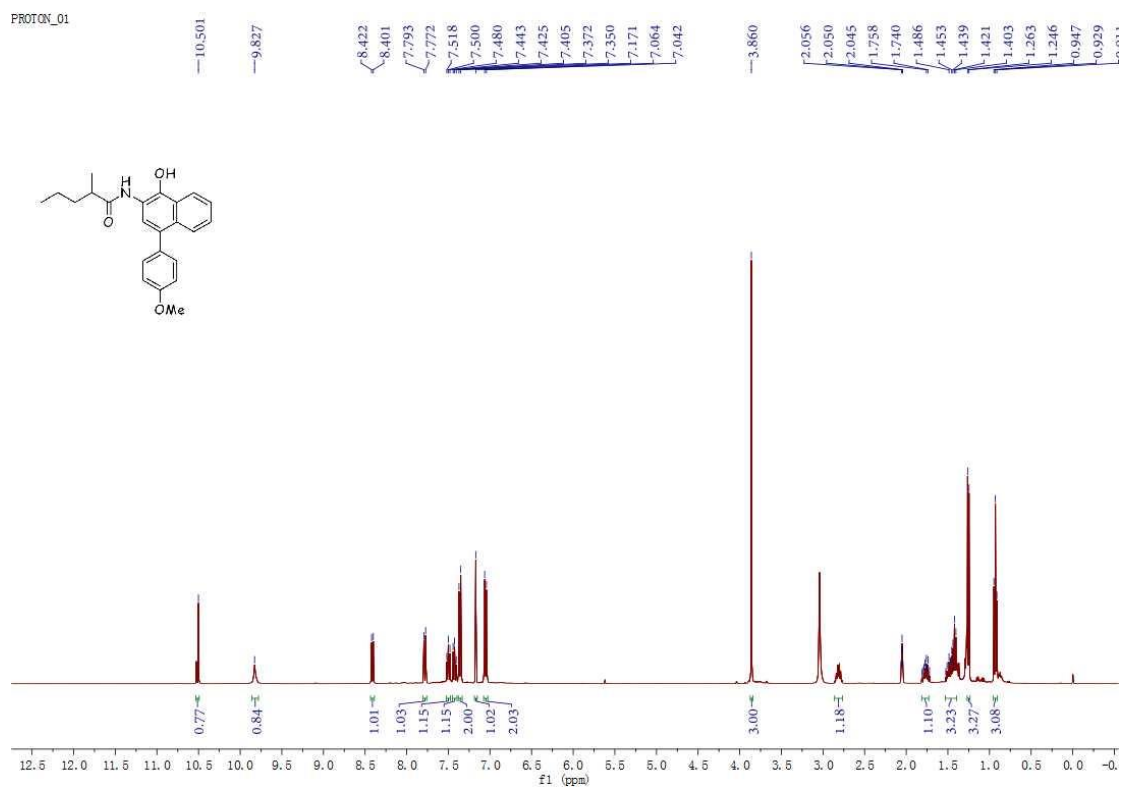

$^1\text{H}$  - NMR spectrum of compound - **4r** (400 MHz, acetone- $d_6$ )

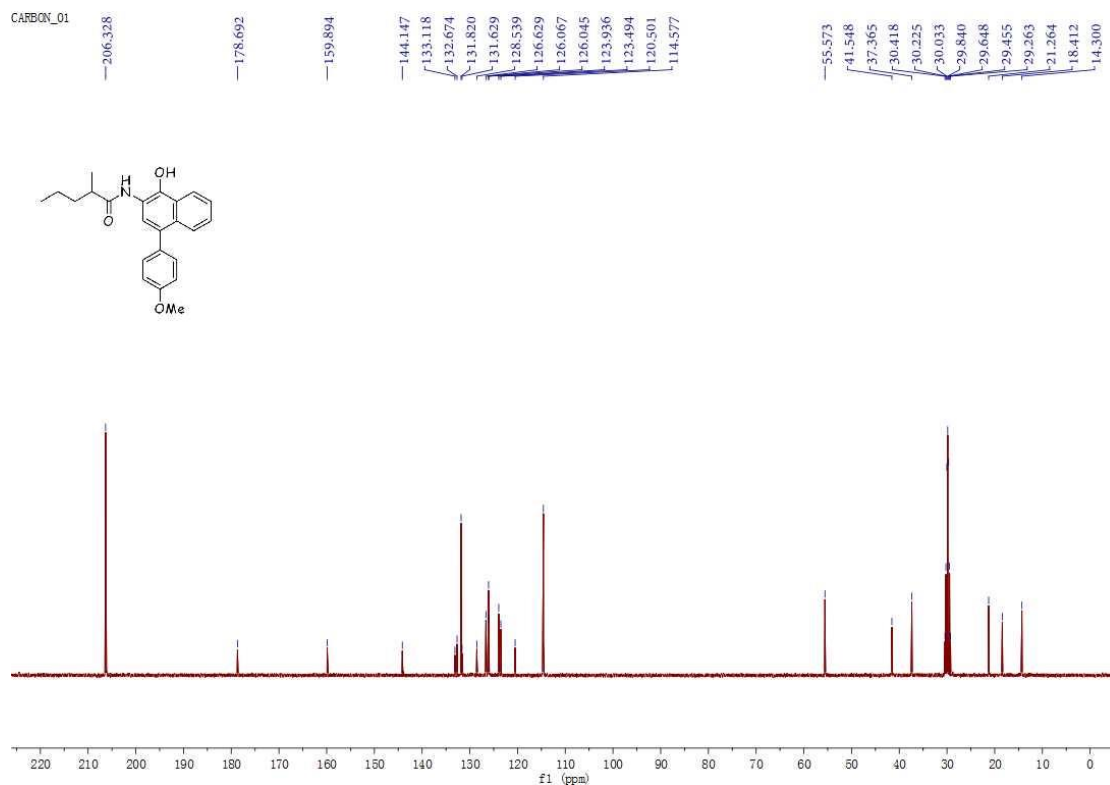

$^{13}\text{C}$  - NMR spectrum of compound - **4r** (101 MHz, acetone- $d_6$ )

20220326-YJS-LKZ-298

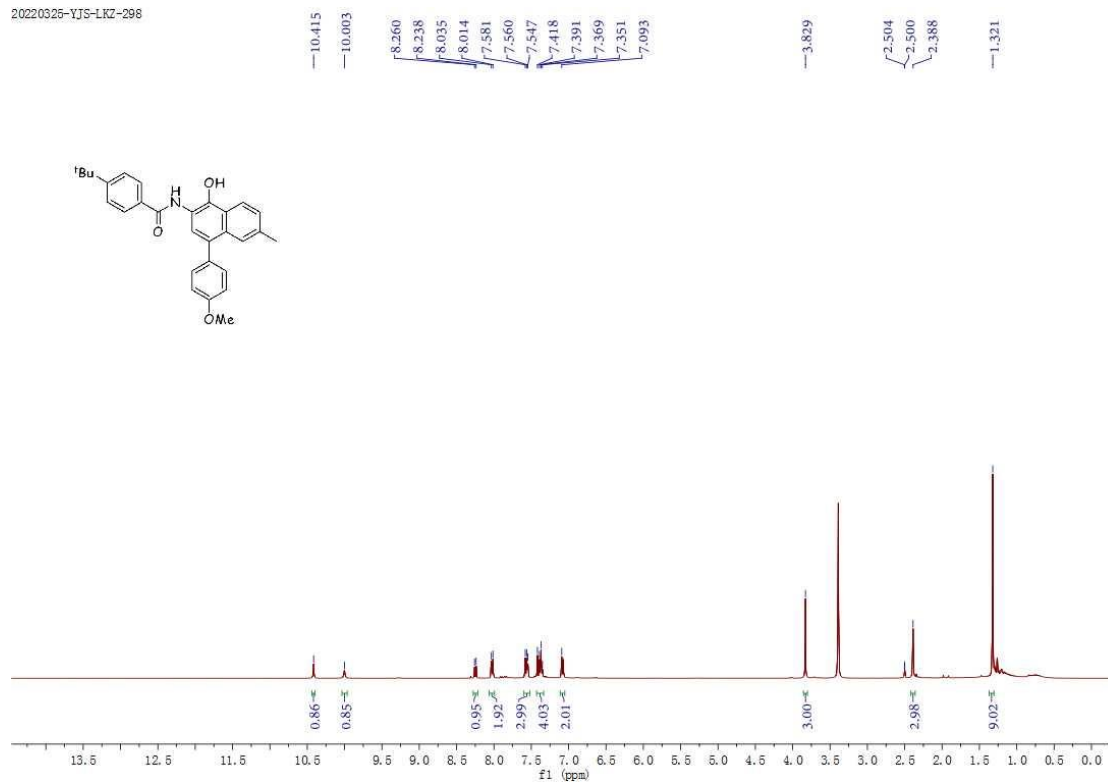

<sup>1</sup>H - NMR spectrum of compound - **4s** (400 MHz, DMSO-*d*<sub>6</sub>)

CARBON\_01

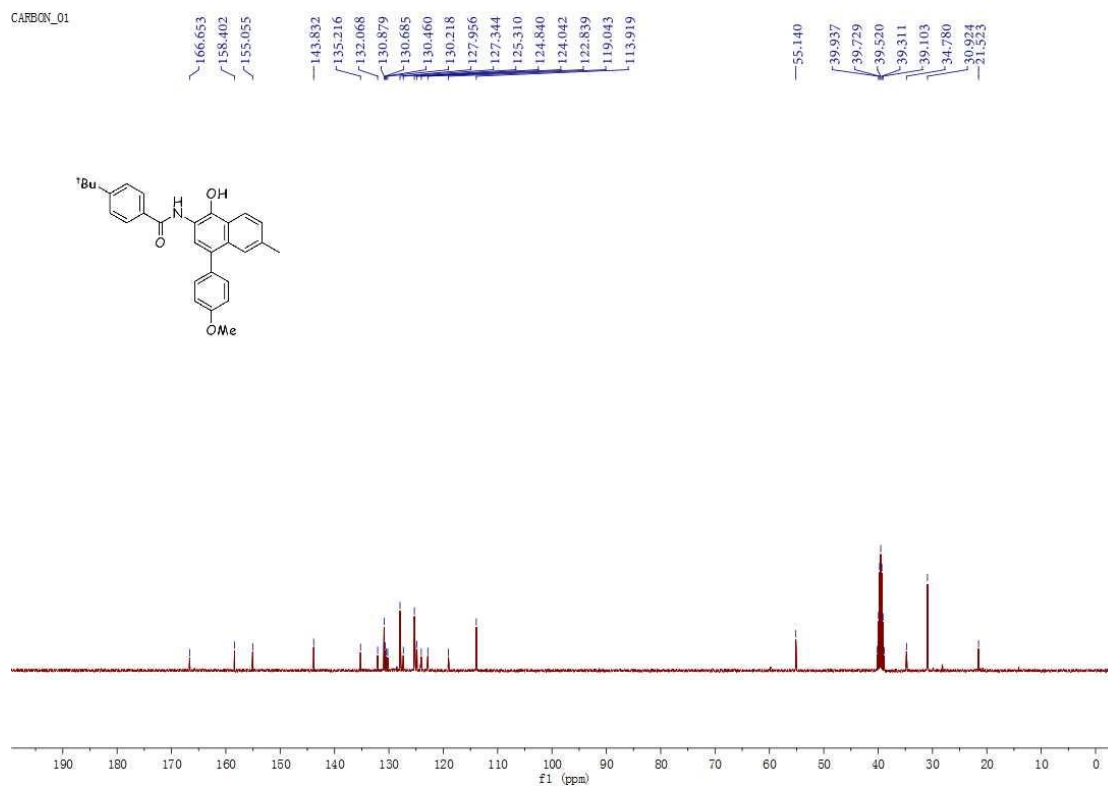

<sup>13</sup>C - NMR spectrum of compound - **4s** (101 MHz, DMSO-*d*<sub>6</sub>)

20220326-YJS-LKZ-296

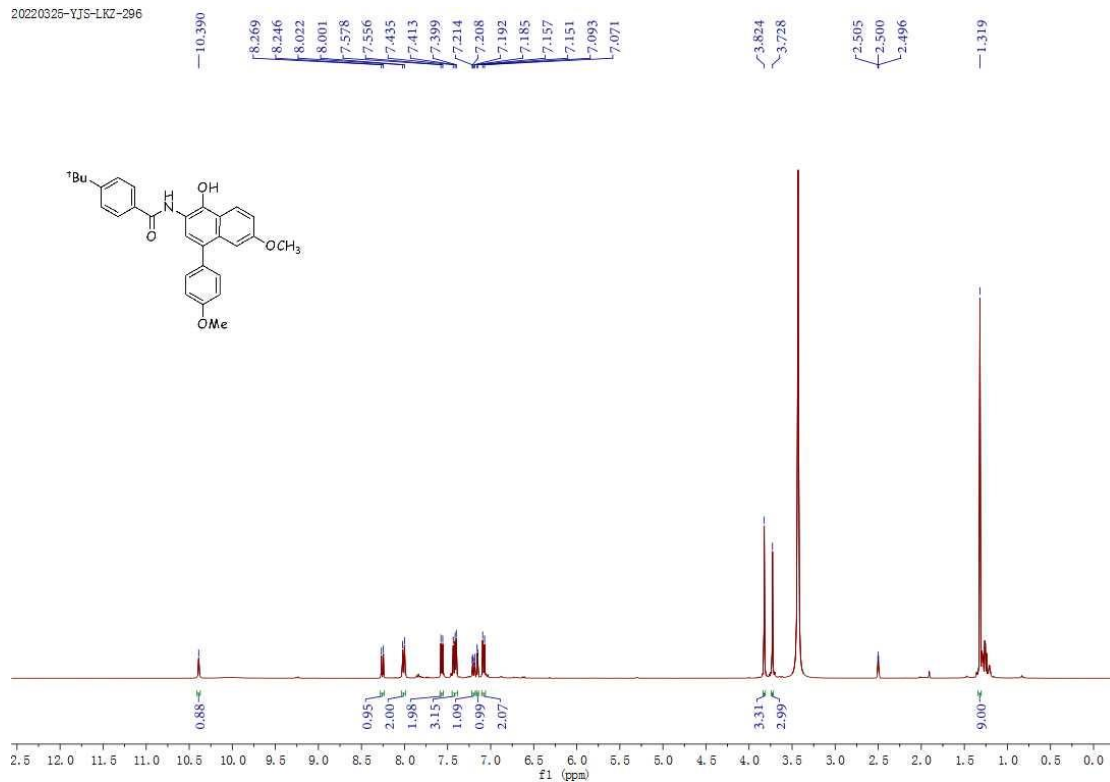

**<sup>1</sup>H - NMR spectrum of compound - 4t (400 MHz, DMSO-*d*<sub>6</sub>)**

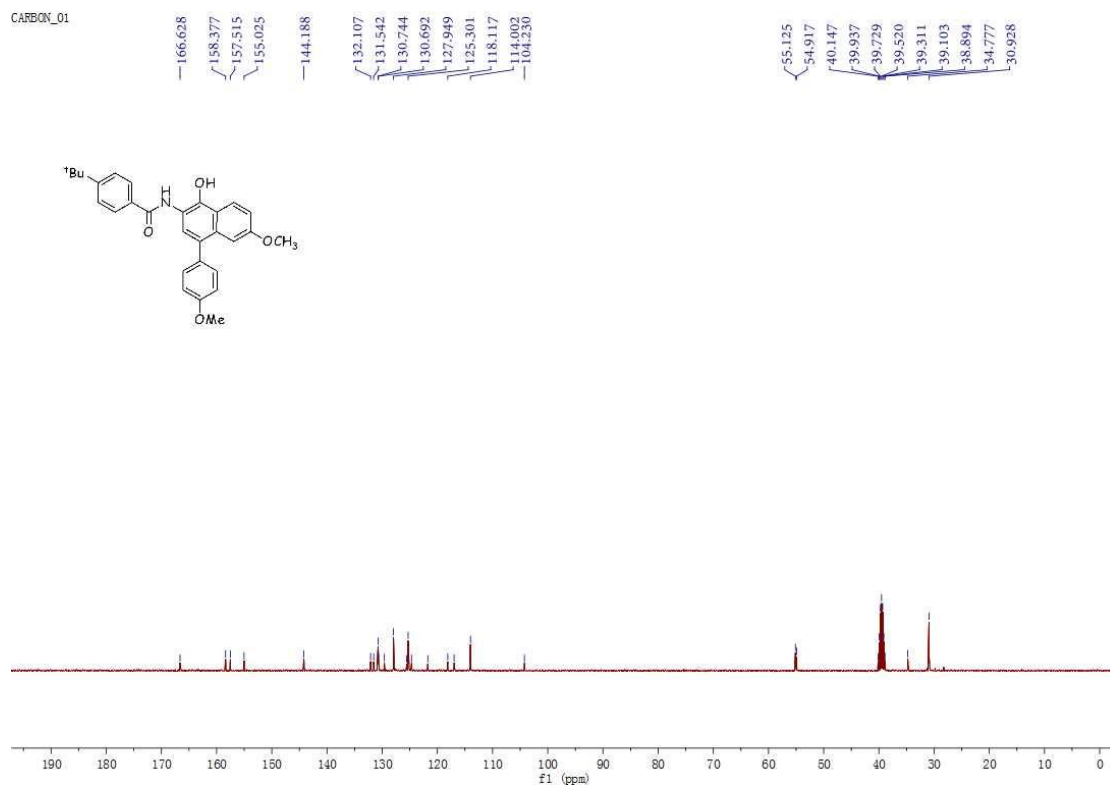

**<sup>13</sup>C - NMR spectrum of compound - 4t (101 MHz, DMSO-*d*<sub>6</sub>)**

20220326-YJS-LKZ-295

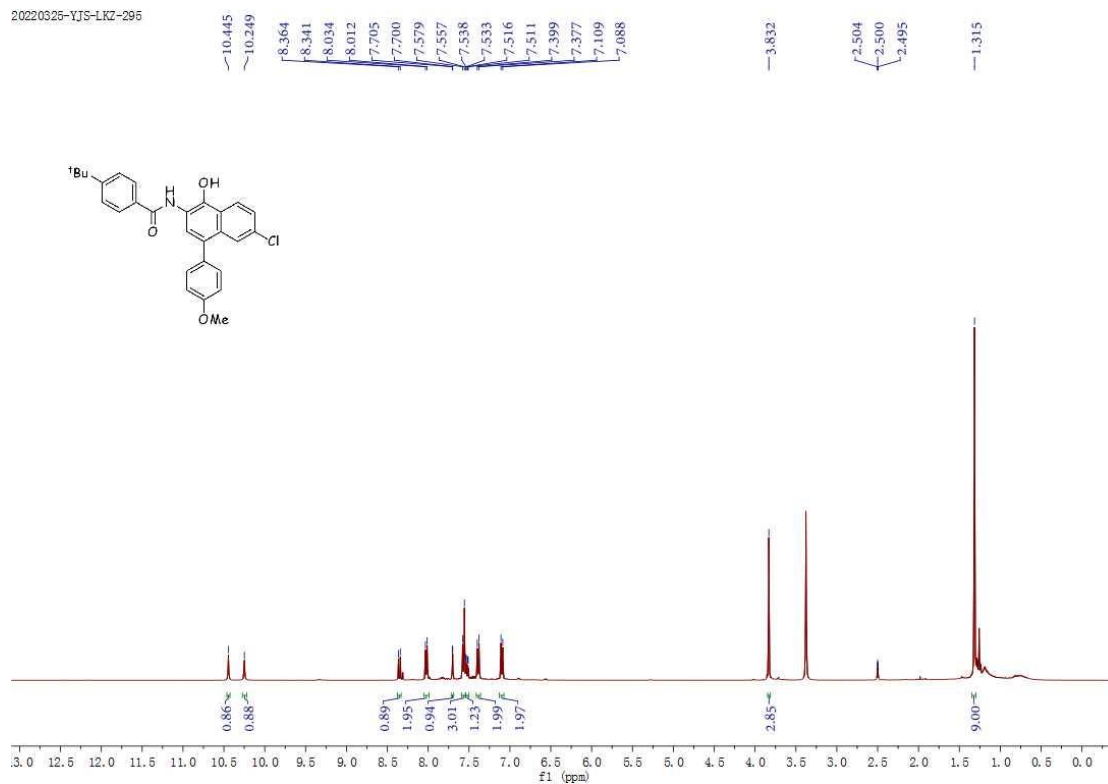

<sup>1</sup>H - NMR spectrum of compound - **4u** (400 MHz, DMSO-*d*<sub>6</sub>)

20220326-YJS-LKZ-295

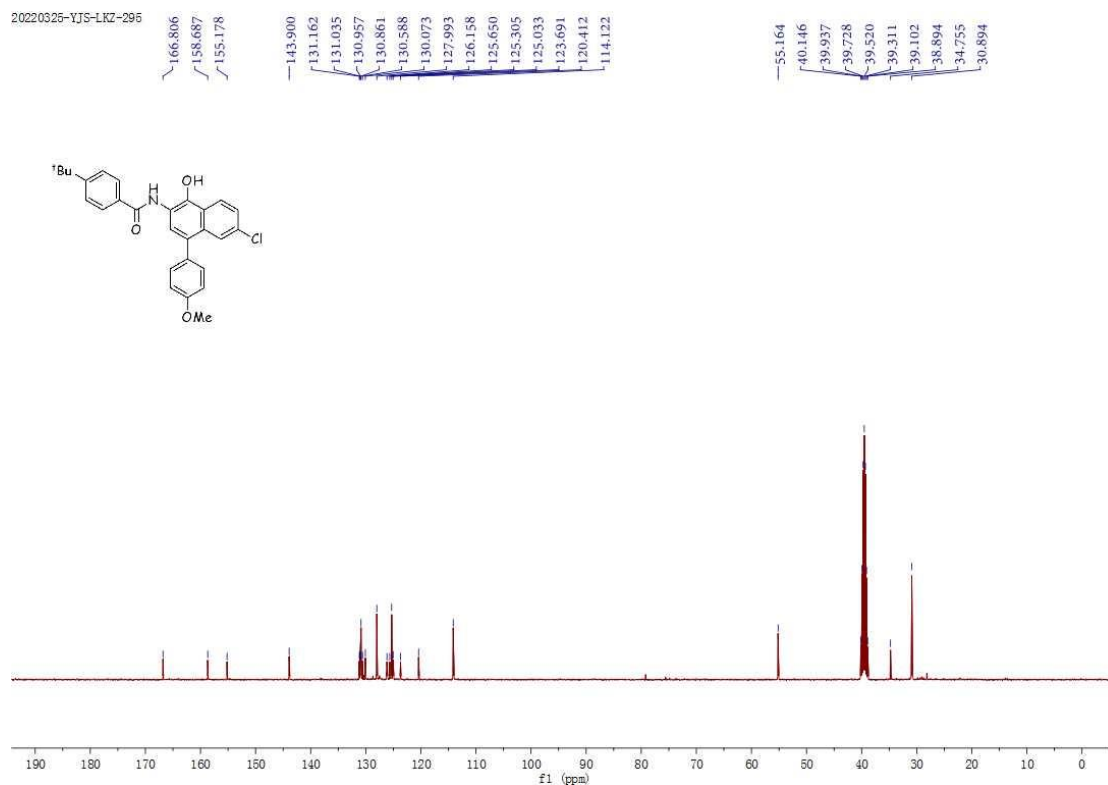

<sup>13</sup>C - NMR spectrum of compound - **4u** (101 MHz, DMSO-*d*<sub>6</sub>)



20220326-YJS-LKZ-301

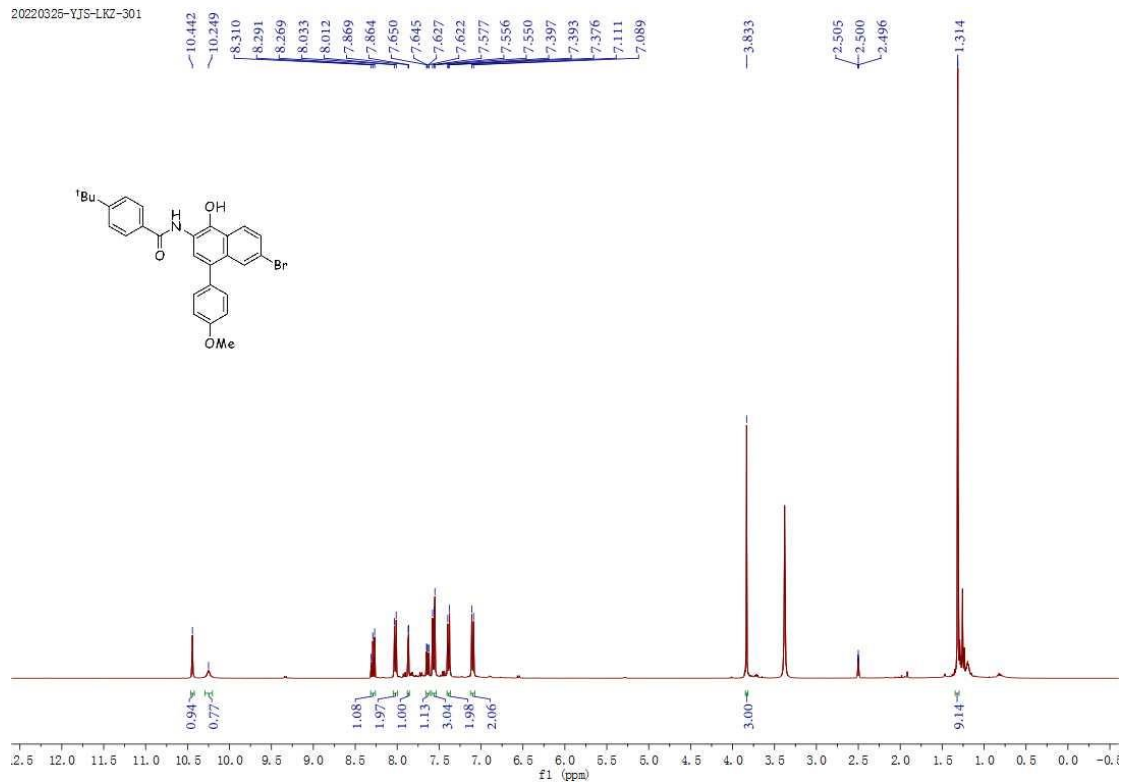

20220326-YJS-LKZ-301

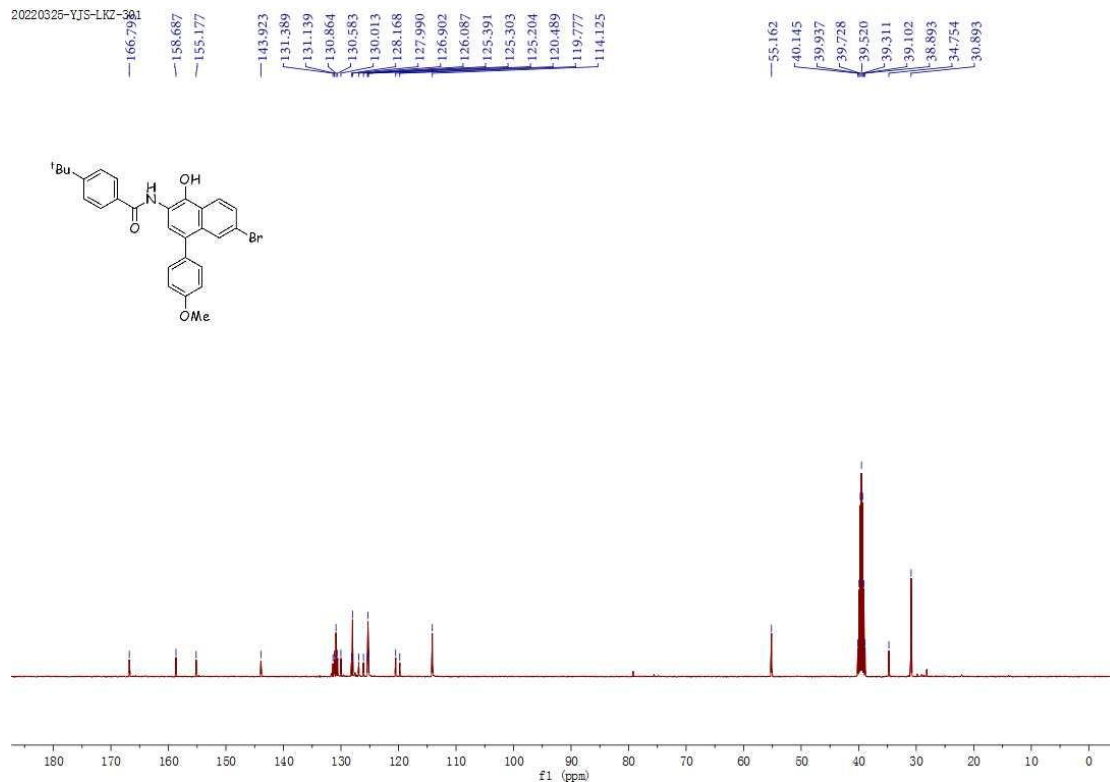

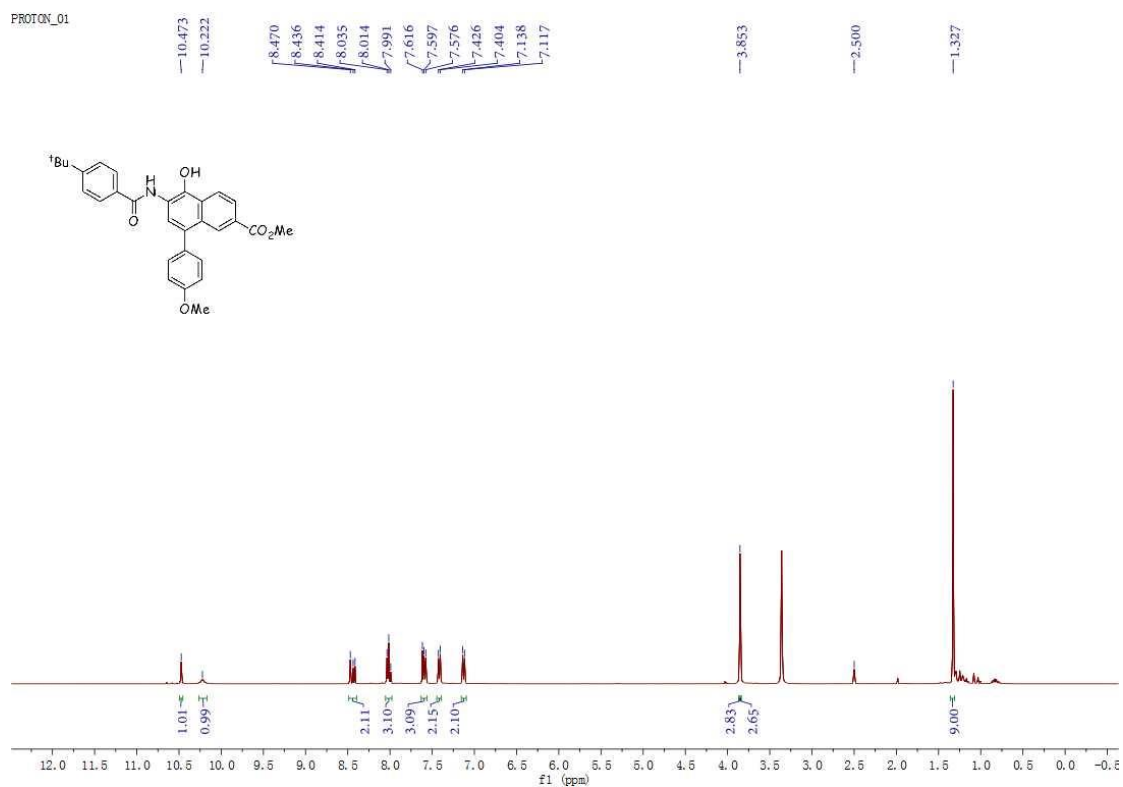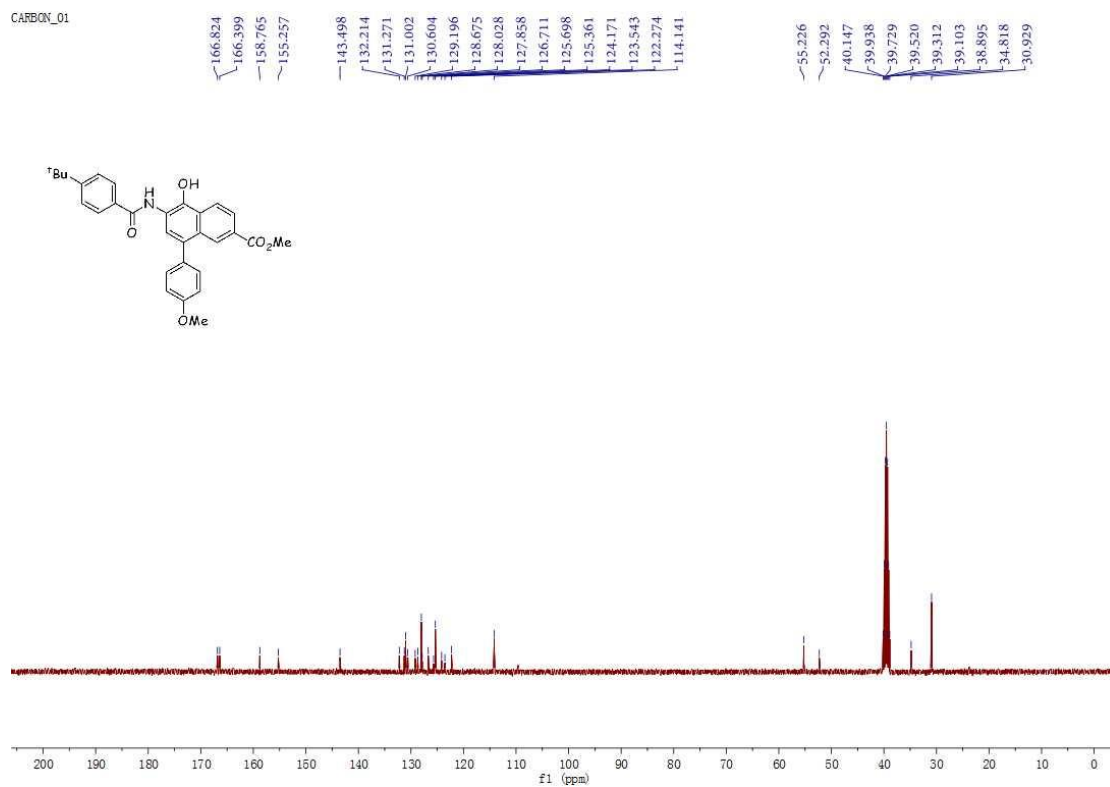

20220326-YJS-LKZ-324

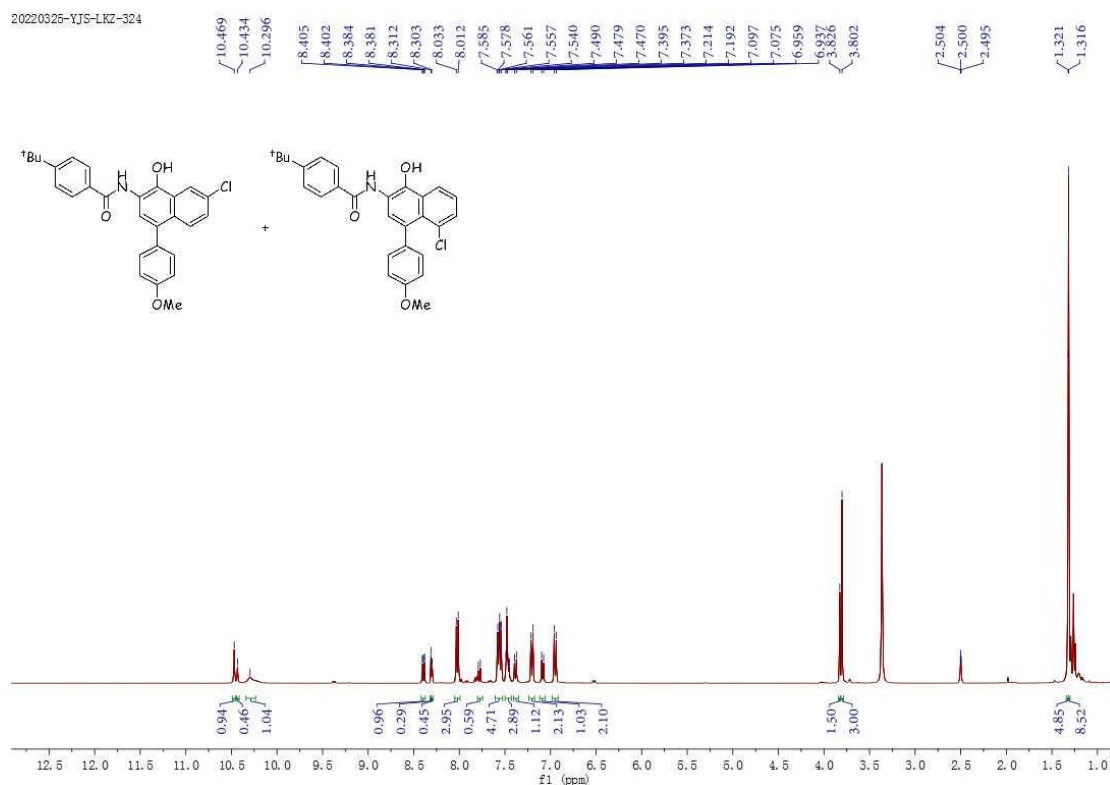

<sup>1</sup>H – NMR spectrum of compound – 4x (400 MHz, DMSO-*d*<sub>6</sub>)

20220326-YJS-LKZ-324

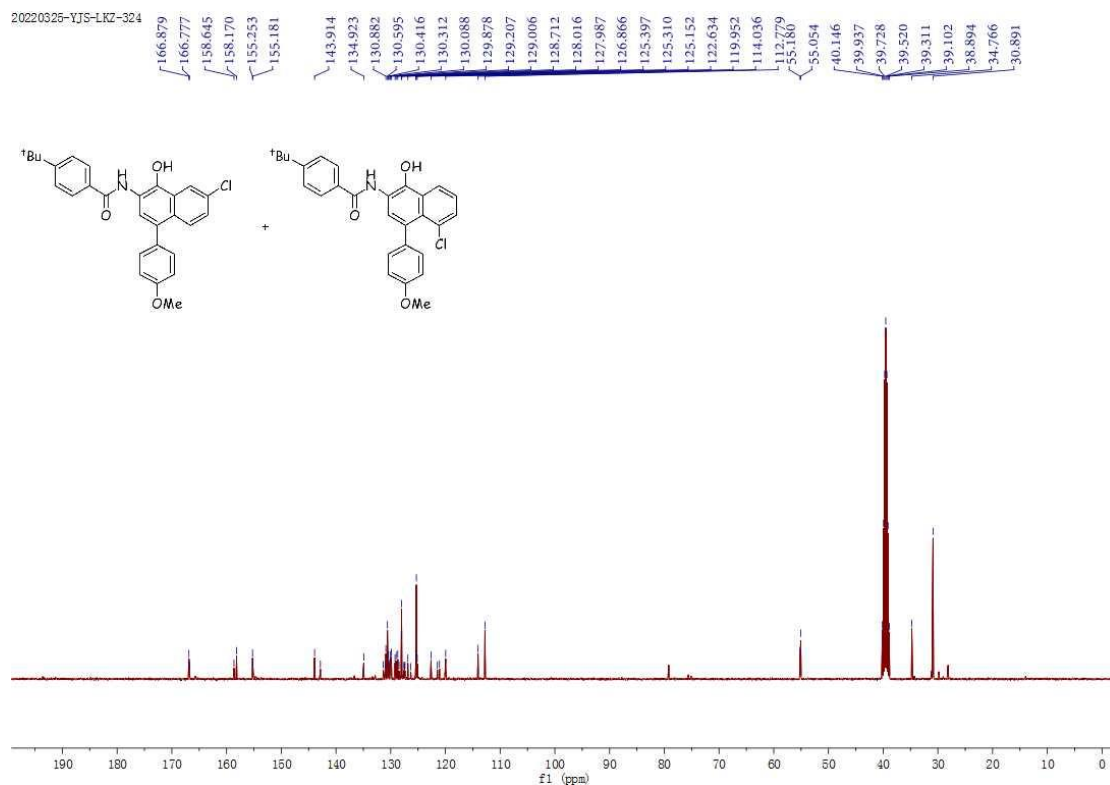

<sup>13</sup>C – NMR spectrum of compound – 4x (101 MHz, DMSO-*d*<sub>6</sub>)

20220326-YJS-LKZ-299

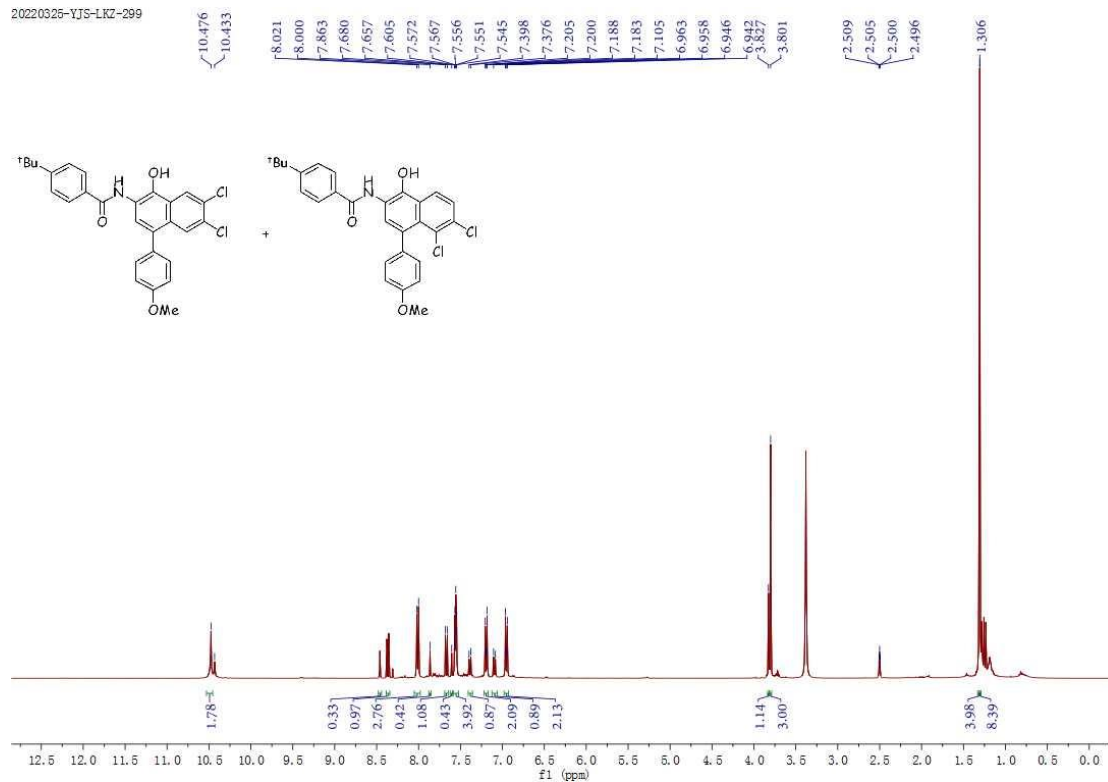

<sup>1</sup>H – NMR spectrum of compound – 4y (400 MHz, DMSO-*d*<sub>6</sub>)

20220326-YJS-LKZ-299

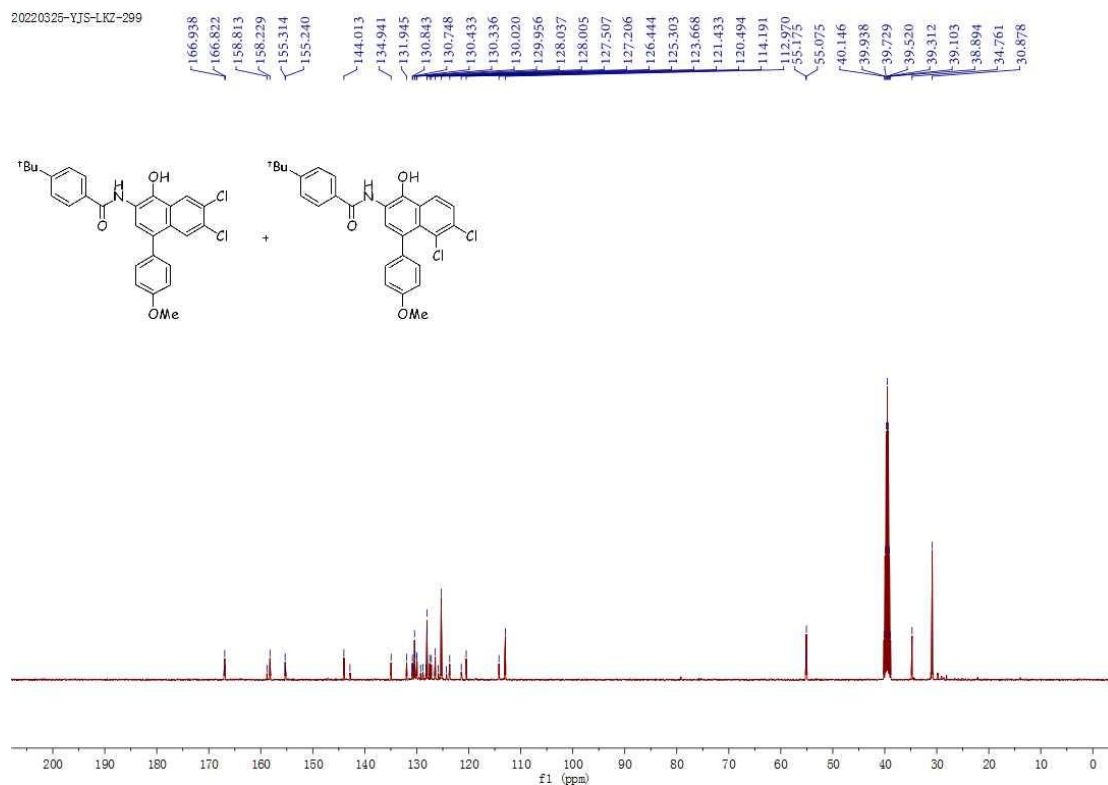

<sup>13</sup>C – NMR spectrum of compound – 4y (101 MHz, DMSO-*d*<sub>6</sub>)

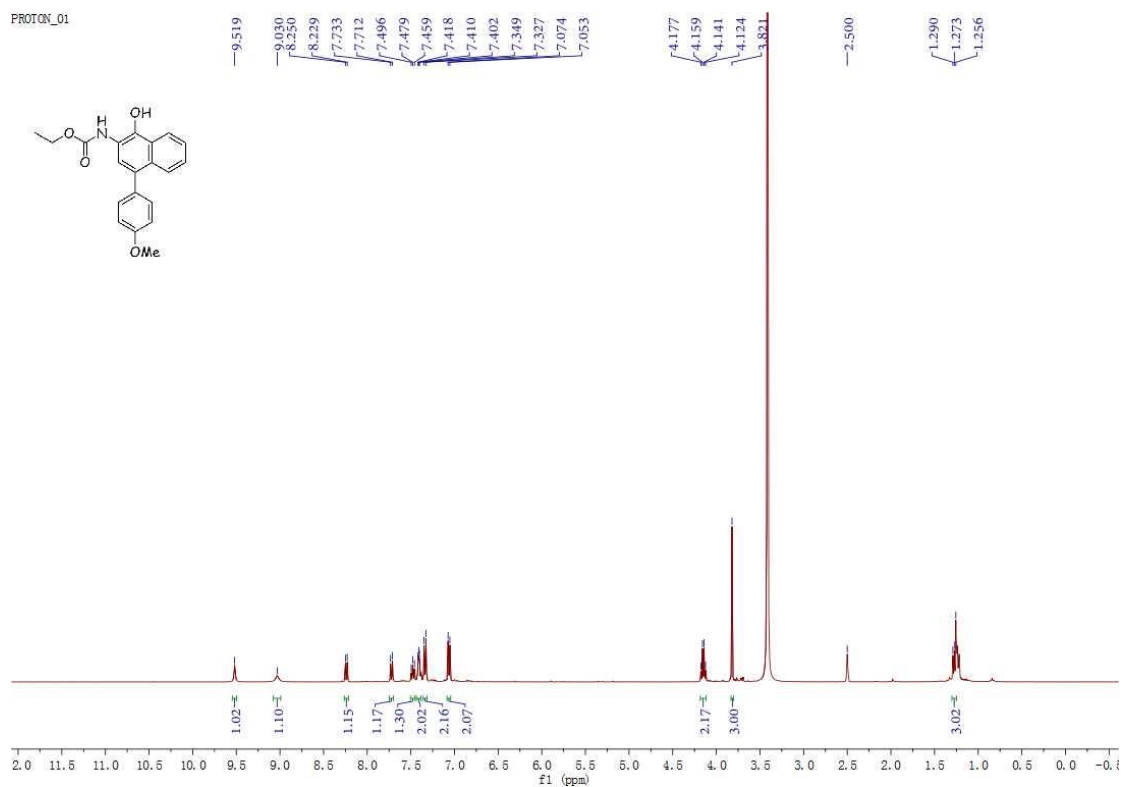

<sup>1</sup>H – NMR spectrum of compound – **4z** (400 MHz, DMSO-*d*<sub>6</sub>)

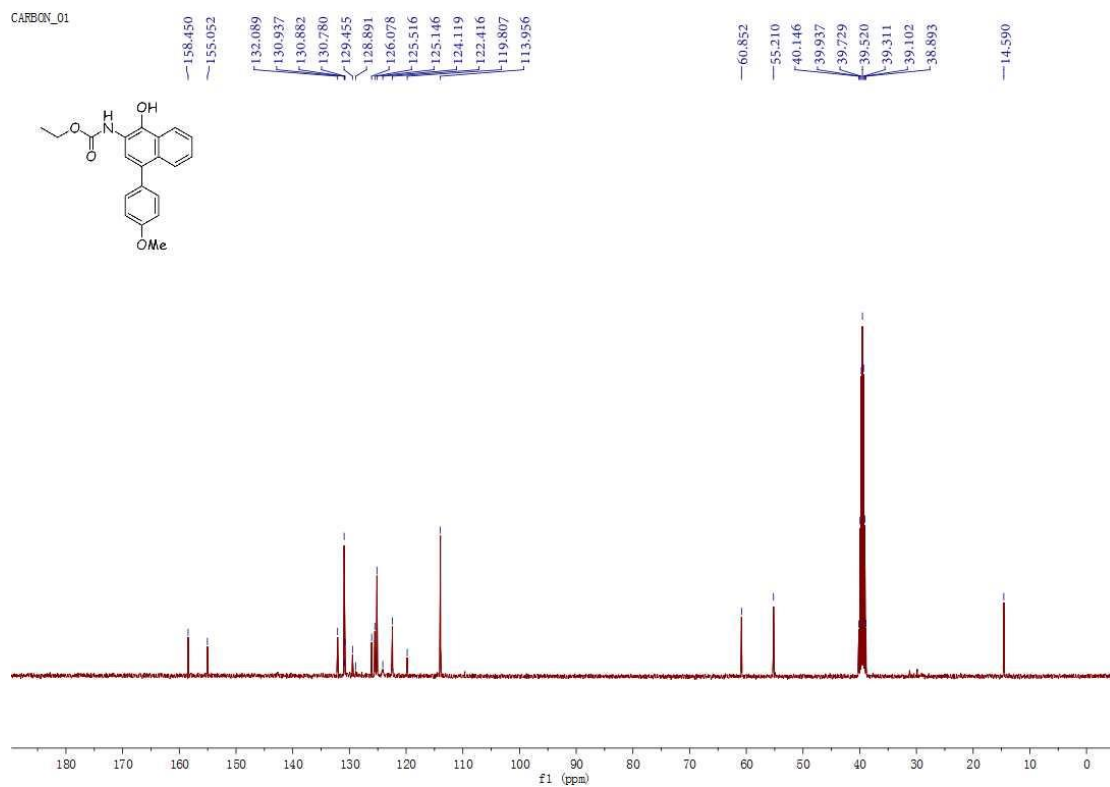

<sup>13</sup>C – NMR spectrum of compound – **4z** (101 MHz, DMSO-*d*<sub>6</sub>)

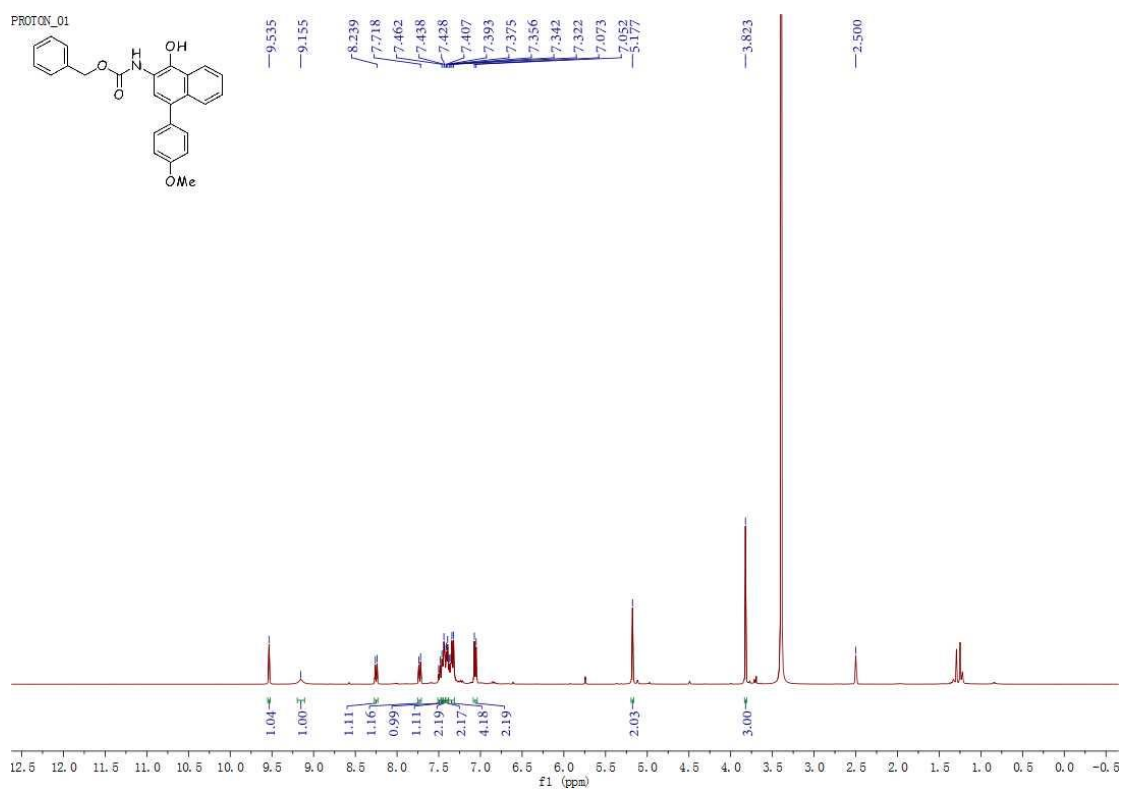

<sup>1</sup>H – NMR spectrum of compound – **4aa** (400 MHz, DMSO-*d*<sub>6</sub>)

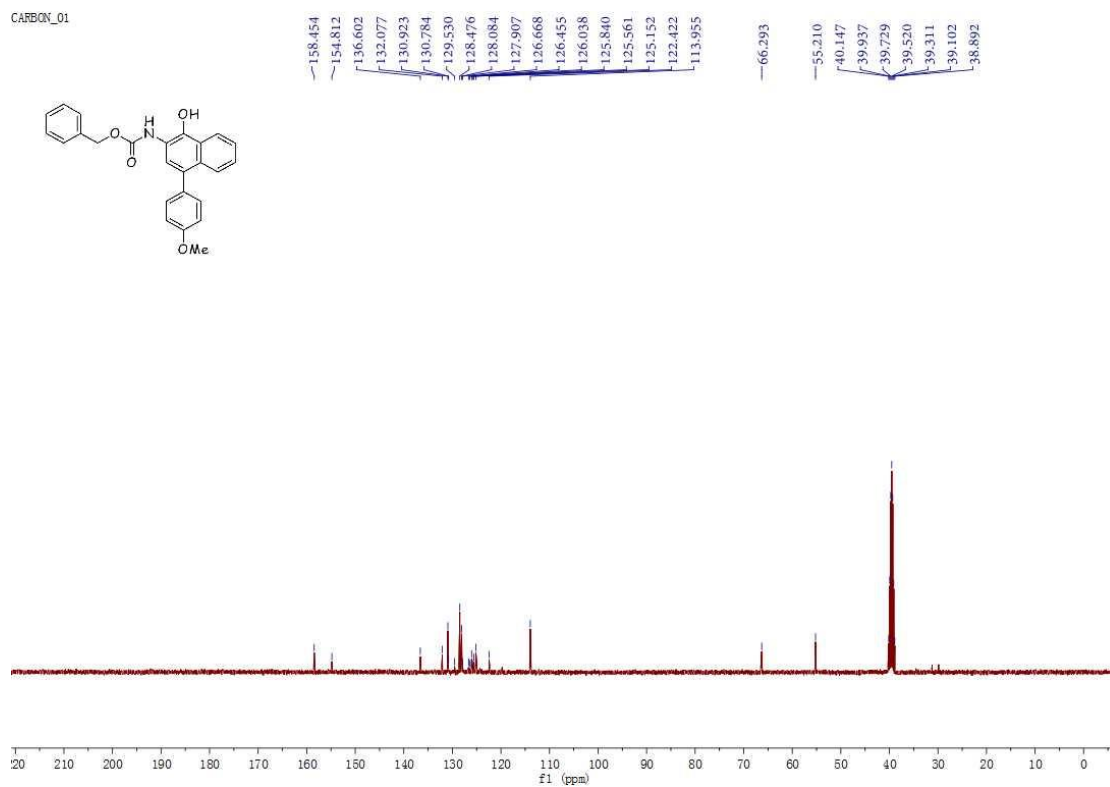

<sup>13</sup>C – NMR spectrum of compound – **4aa** (101 MHz, DMSO-*d*<sub>6</sub>)

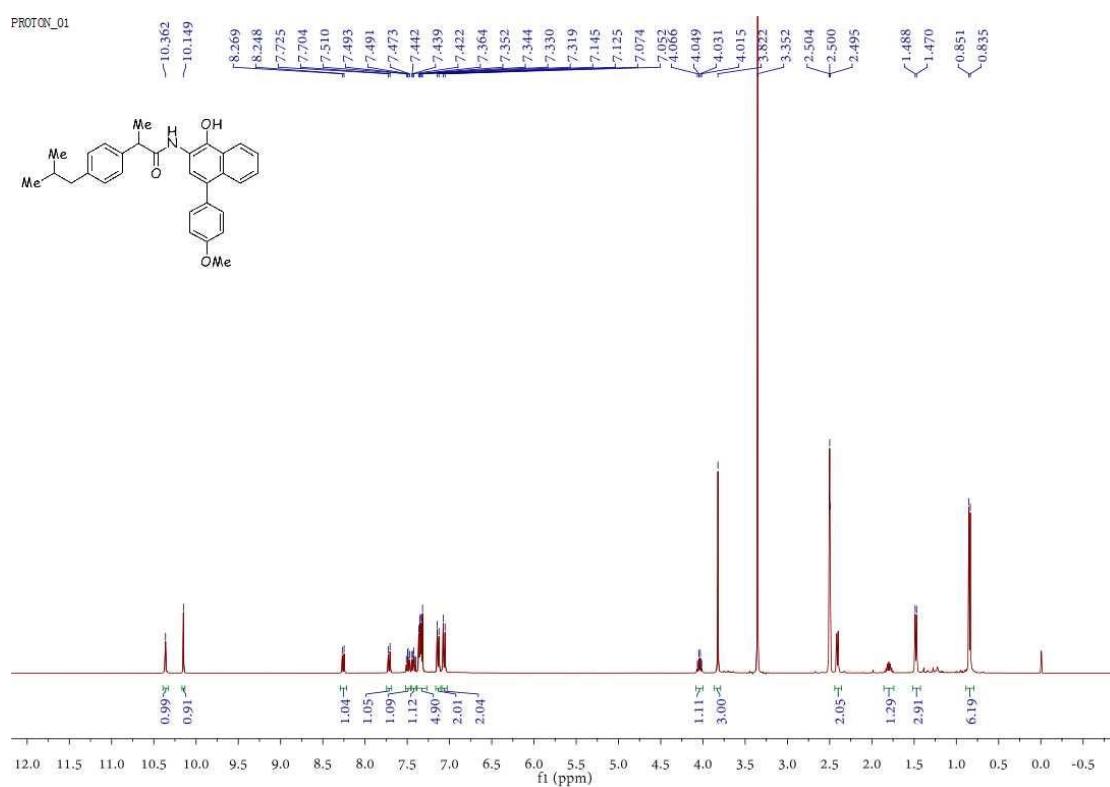

$^1\text{H}$  - NMR spectrum of compound - **5a** (400 MHz, DMSO- $d_6$ )

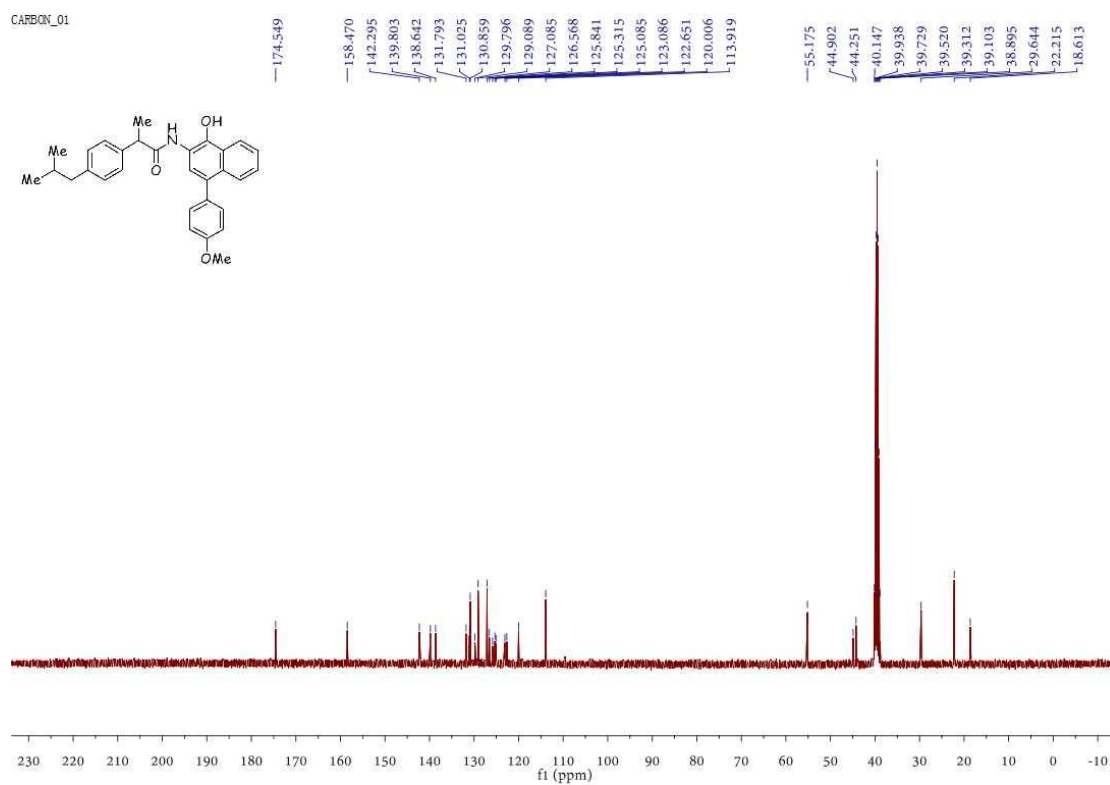

$^{13}\text{C}$  - NMR spectrum of compound - **5a** (101 MHz, DMSO- $d_6$ )

20220326-YJS-LKZ-236

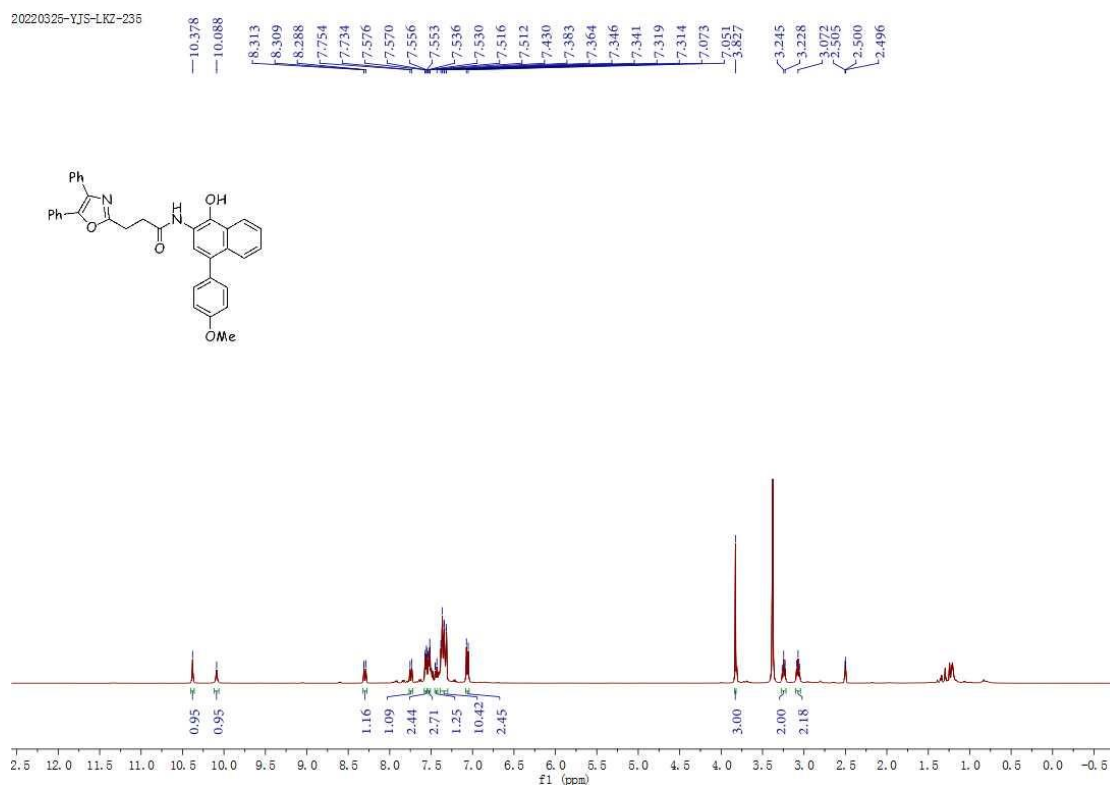

<sup>1</sup>H – NMR spectrum of compound – **5b** (400 MHz, DMSO-*d*<sub>6</sub>)

20220326-YJS-LKZ-236

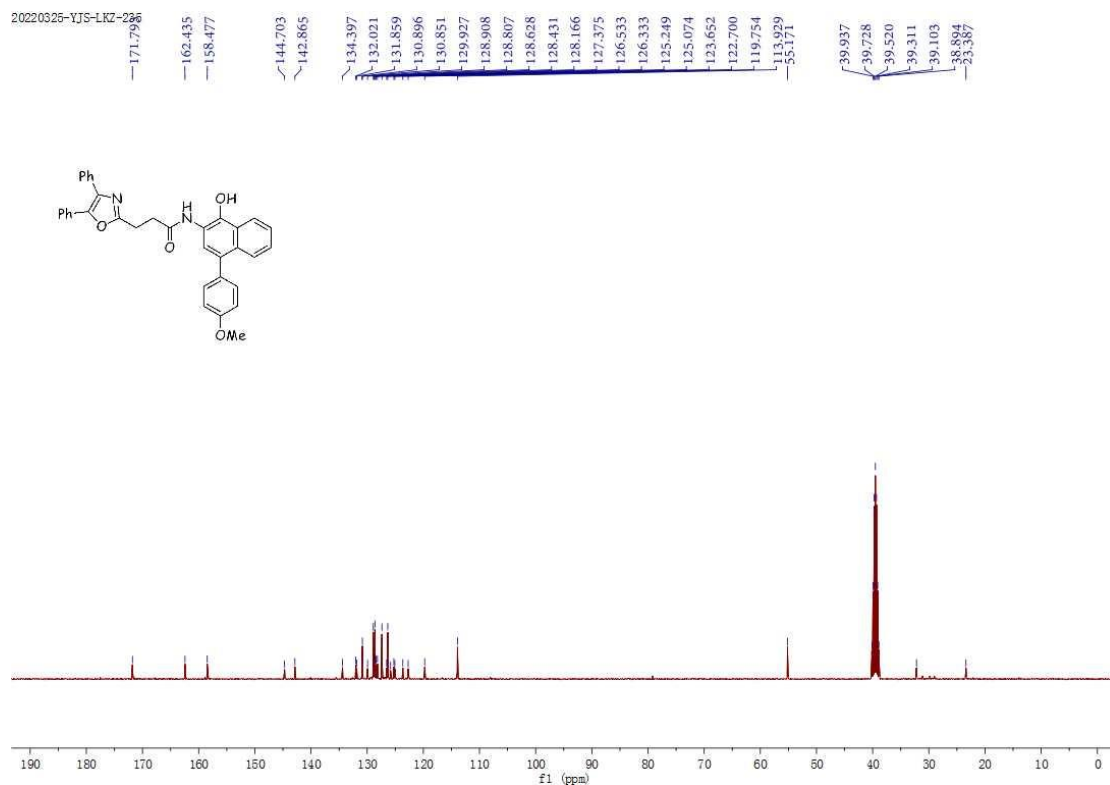

<sup>13</sup>C – NMR spectrum of compound – **5b** (101 MHz, DMSO-*d*<sub>6</sub>)



20220326-YJS-LKZ-264

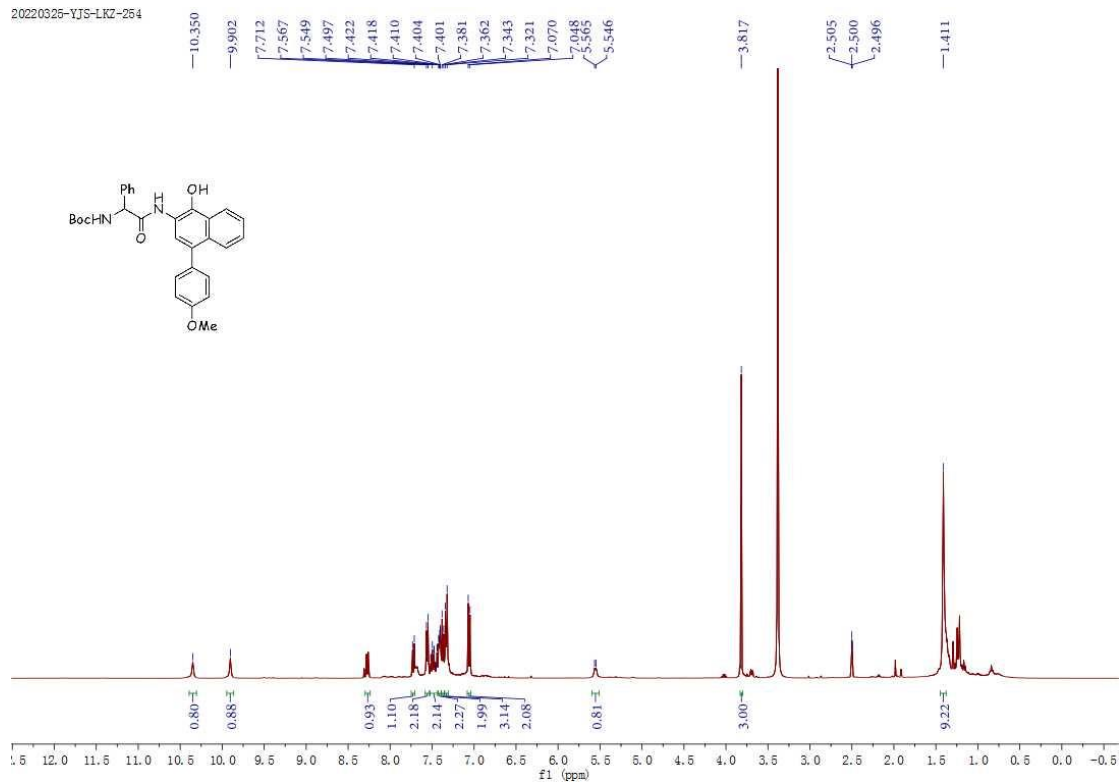

<sup>1</sup>H - NMR spectrum of compound - 5c (400 MHz, DMSO-d<sub>6</sub>)

20220326-YJS-LKZ-264

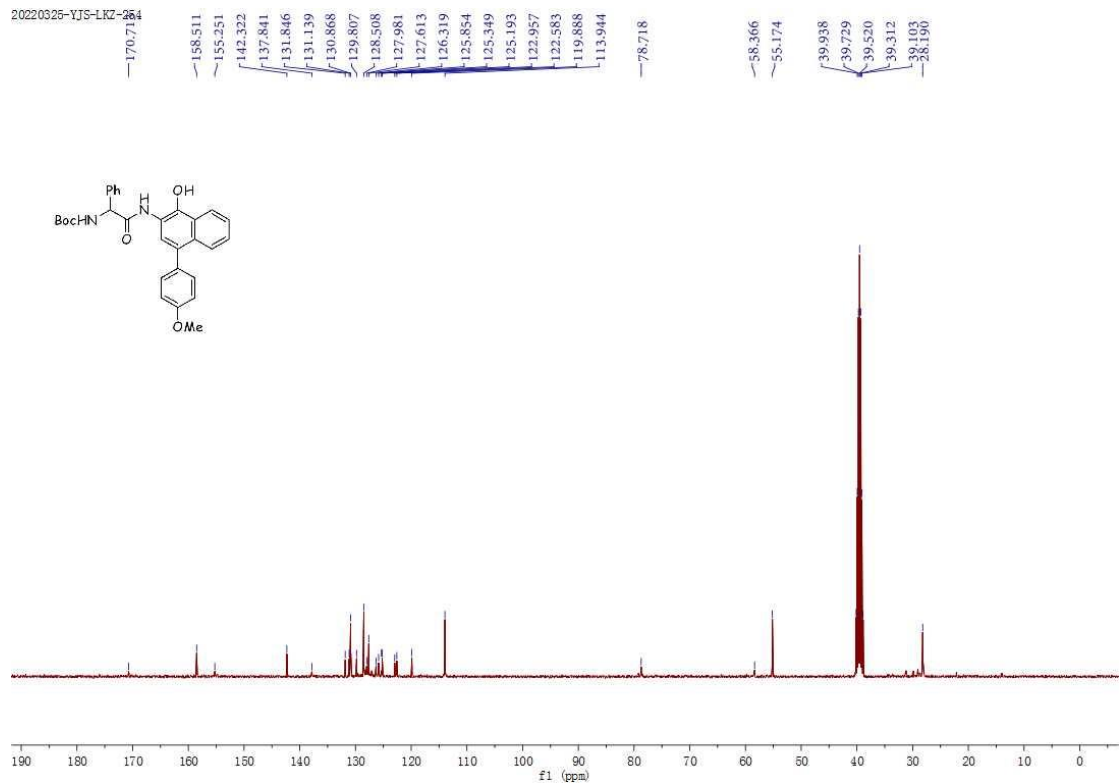

<sup>13</sup>C - NMR spectrum of compound - 5c (101 MHz, DMSO-d<sub>6</sub>)

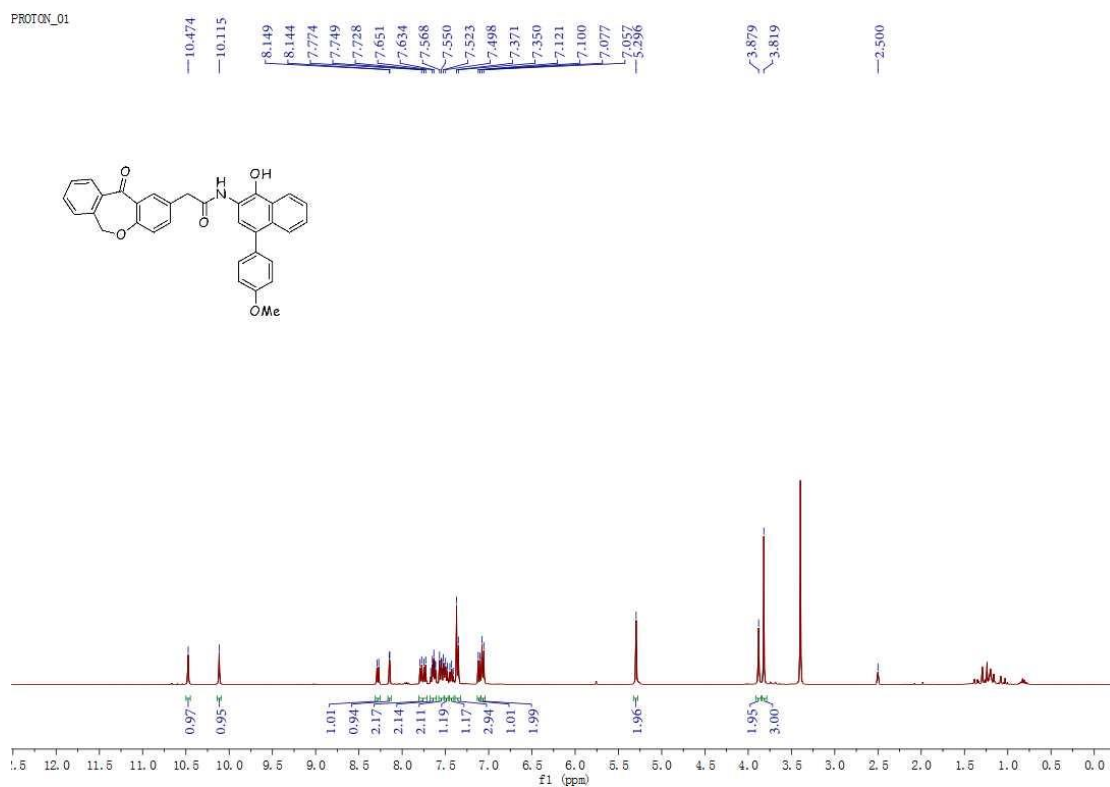

$^1\text{H}$  - NMR spectrum of compound - **5d** (400 MHz,  $\text{DMSO-}d_6$ )

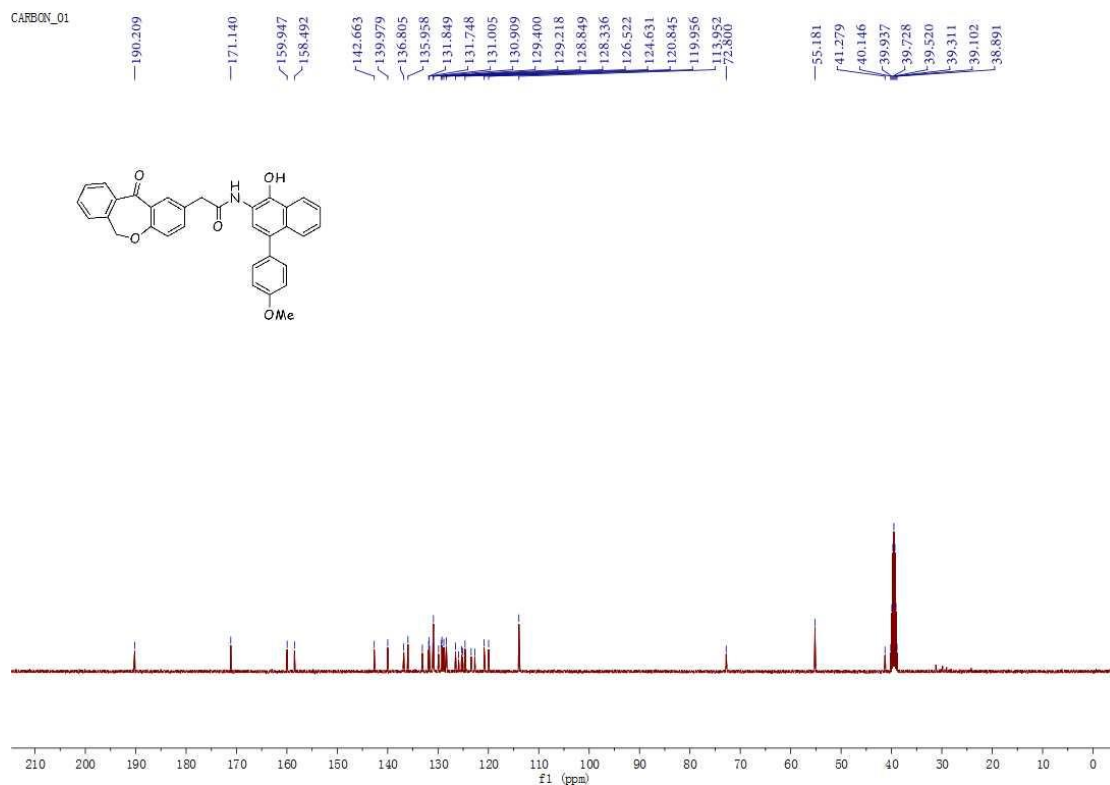

$^{13}\text{C}$  - NMR spectrum of compound - **5d** (101 MHz,  $\text{DMSO-}d_6$ )

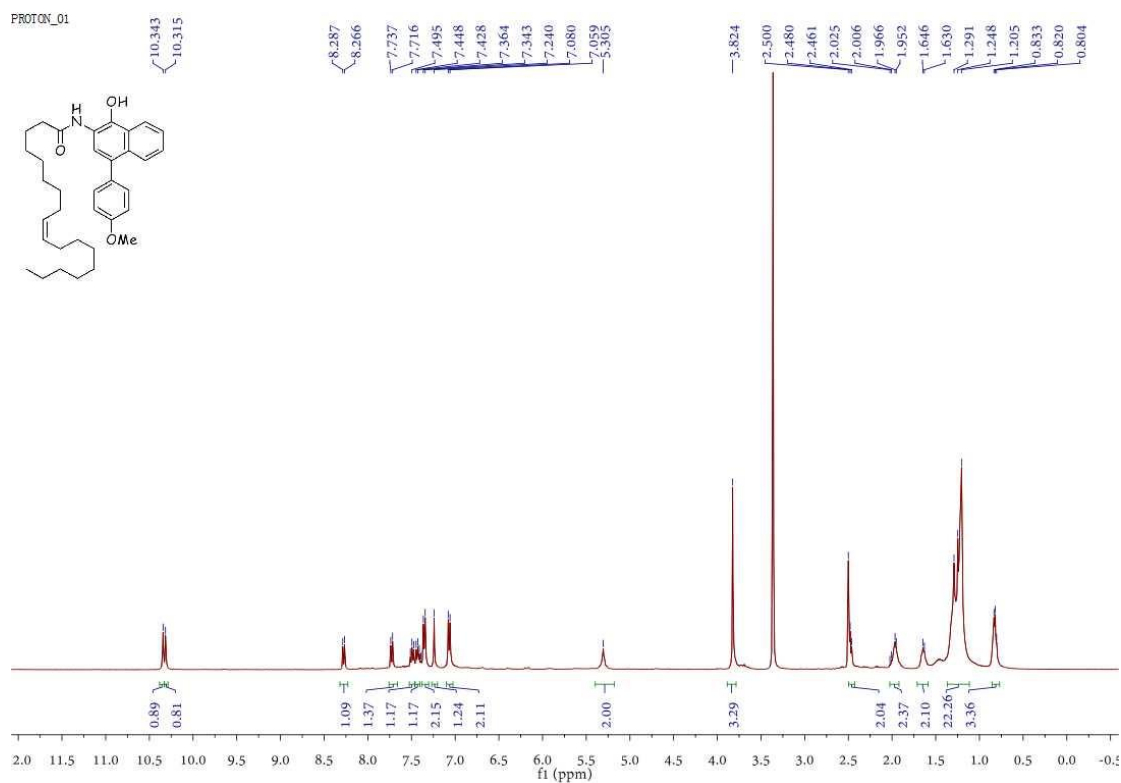

<sup>1</sup>H - NMR spectrum of compound - **5e** (400 MHz, DMSO-d<sub>6</sub>)

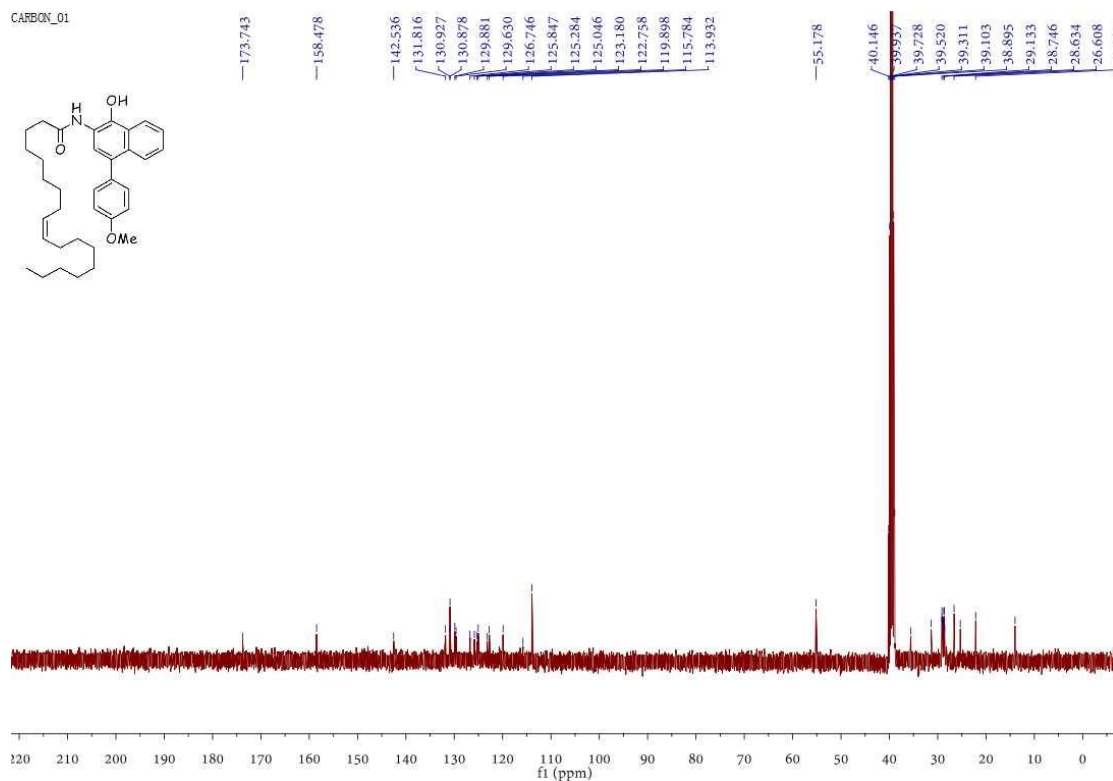

<sup>13</sup>C - NMR spectrum of compound - **5e** (101 MHz, DMSO-d<sub>6</sub>)

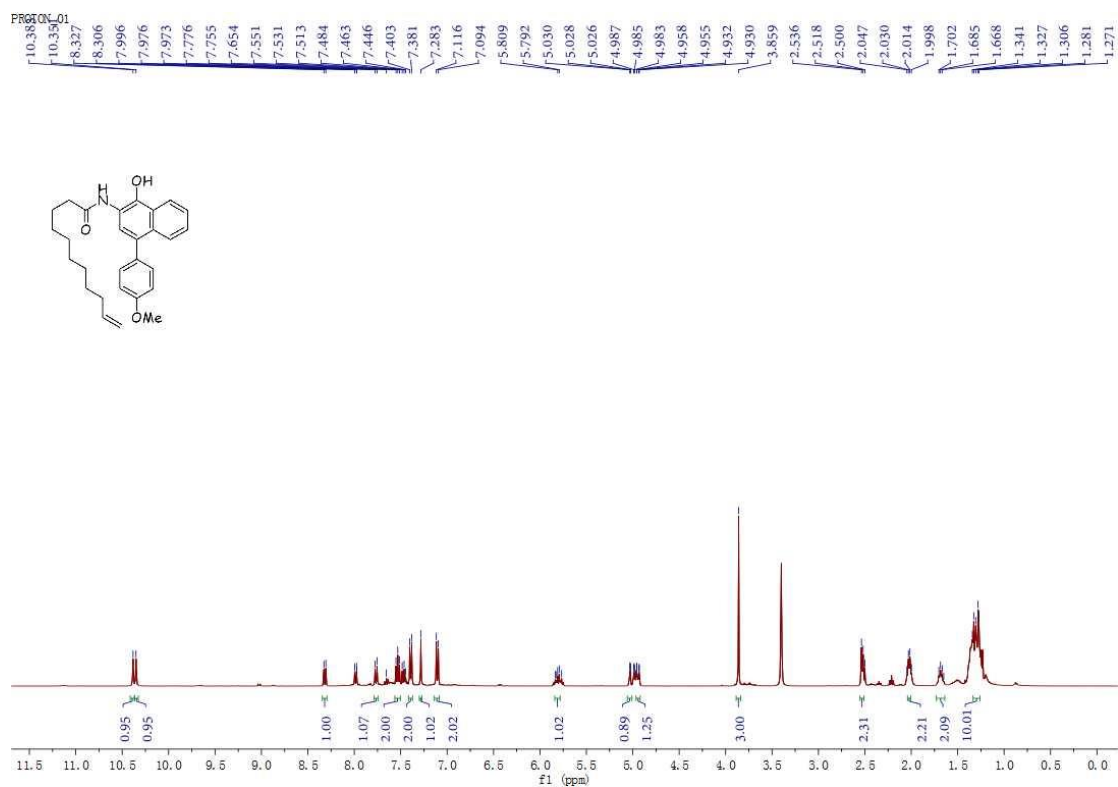

$^1\text{H}$  - NMR spectrum of compound – **5f** (400 MHz, DMSO- $d_6$ )

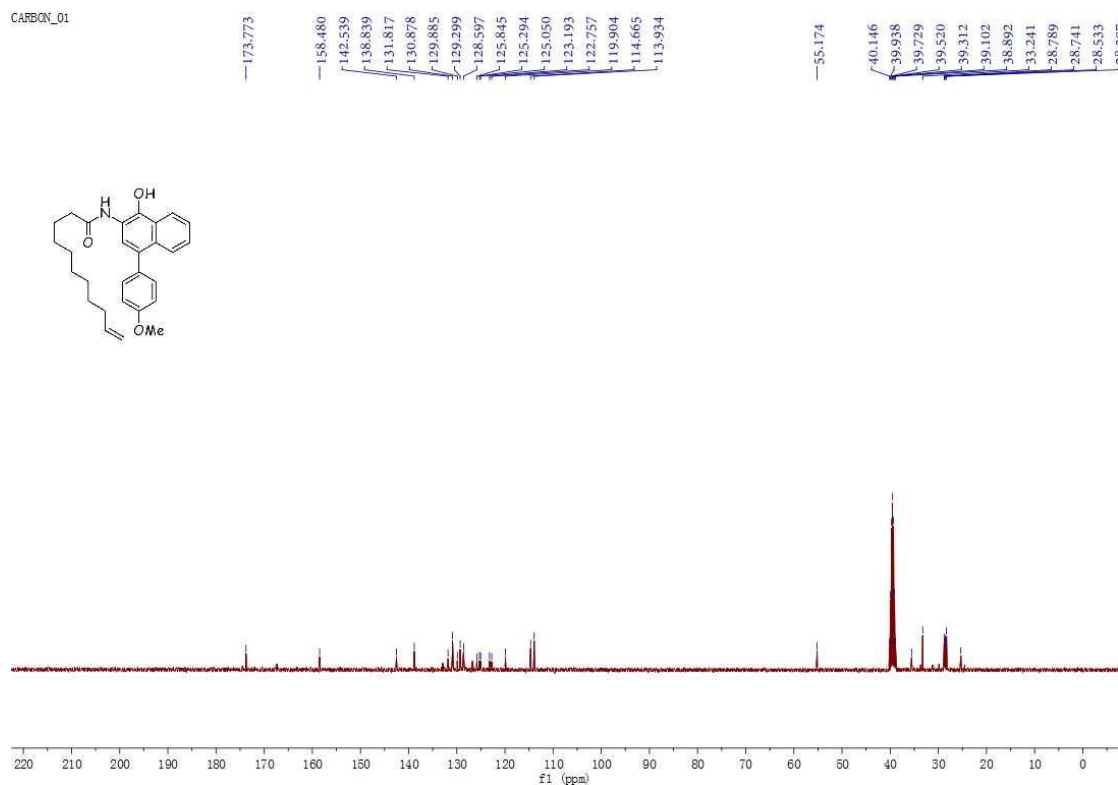

$^{13}\text{C}$  - NMR spectrum of compound – **5f** (101 MHz, DMSO- $d_6$ )

PROTON\_01

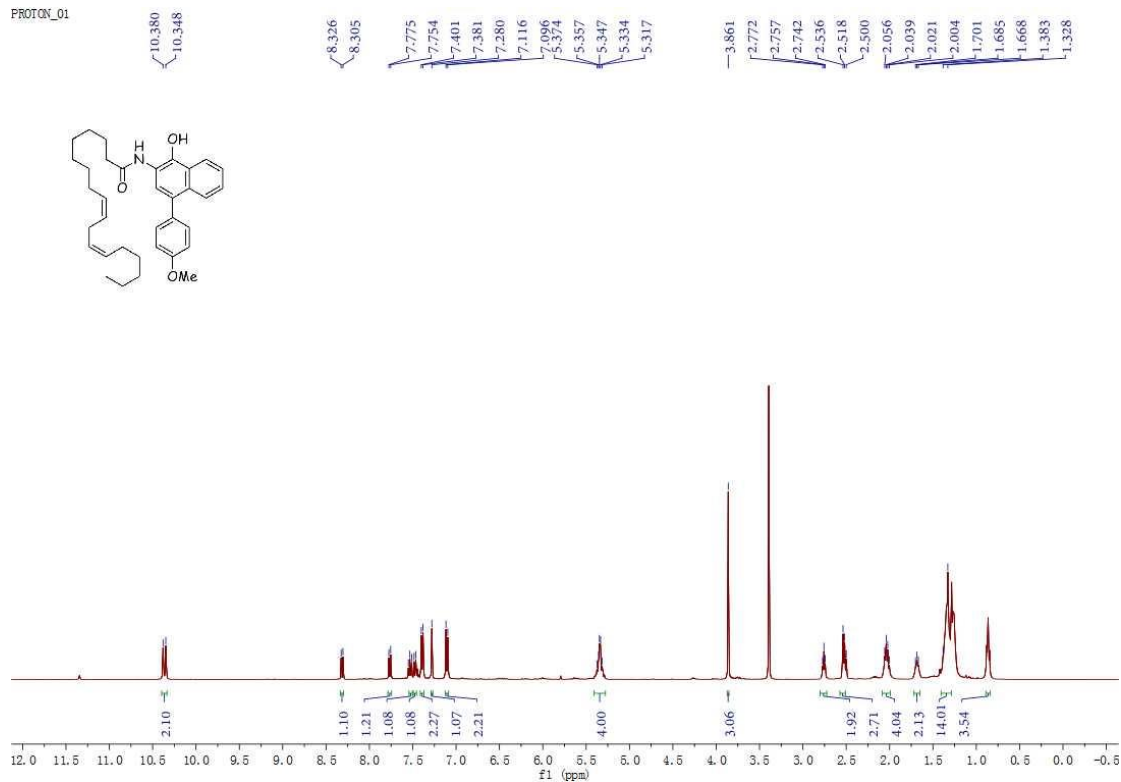

$^1\text{H}$  - NMR spectrum of compound - **5g** (400 MHz,  $\text{DMSO-}d_6$ )

CARBON\_01

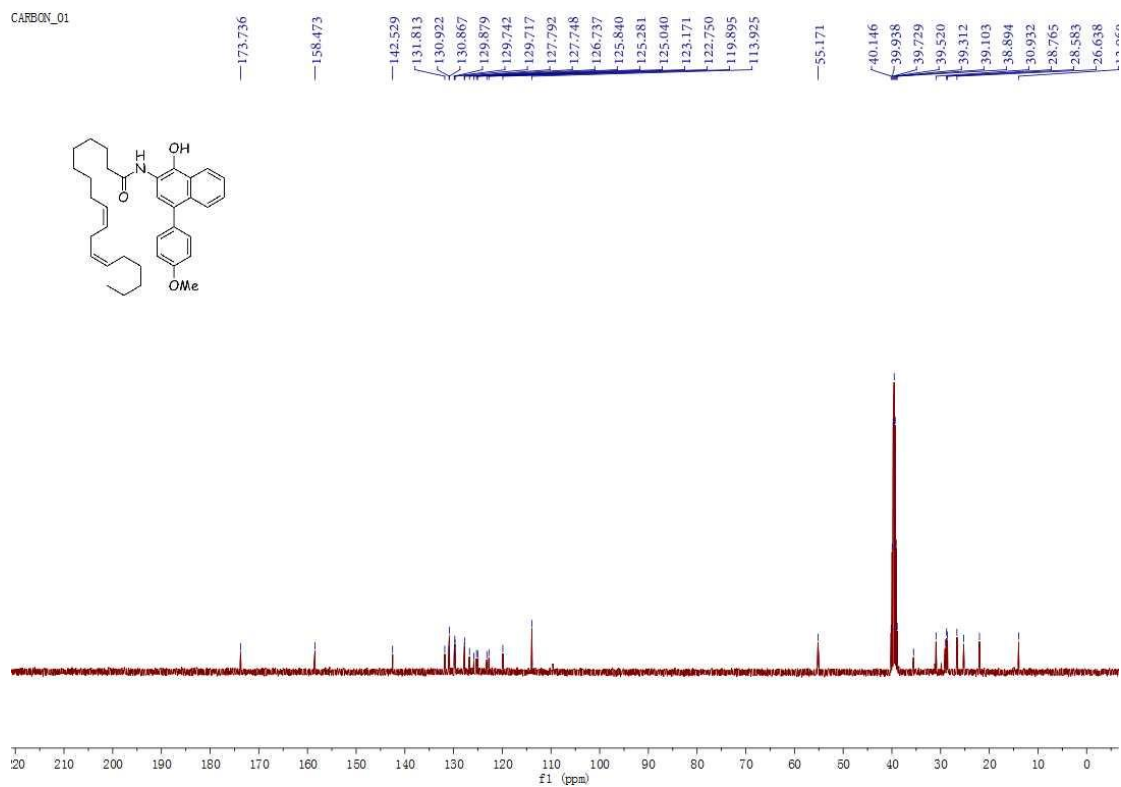

$^{13}\text{C}$  - NMR spectrum of compound - **5g** (101 MHz,  $\text{DMSO-}d_6$ )

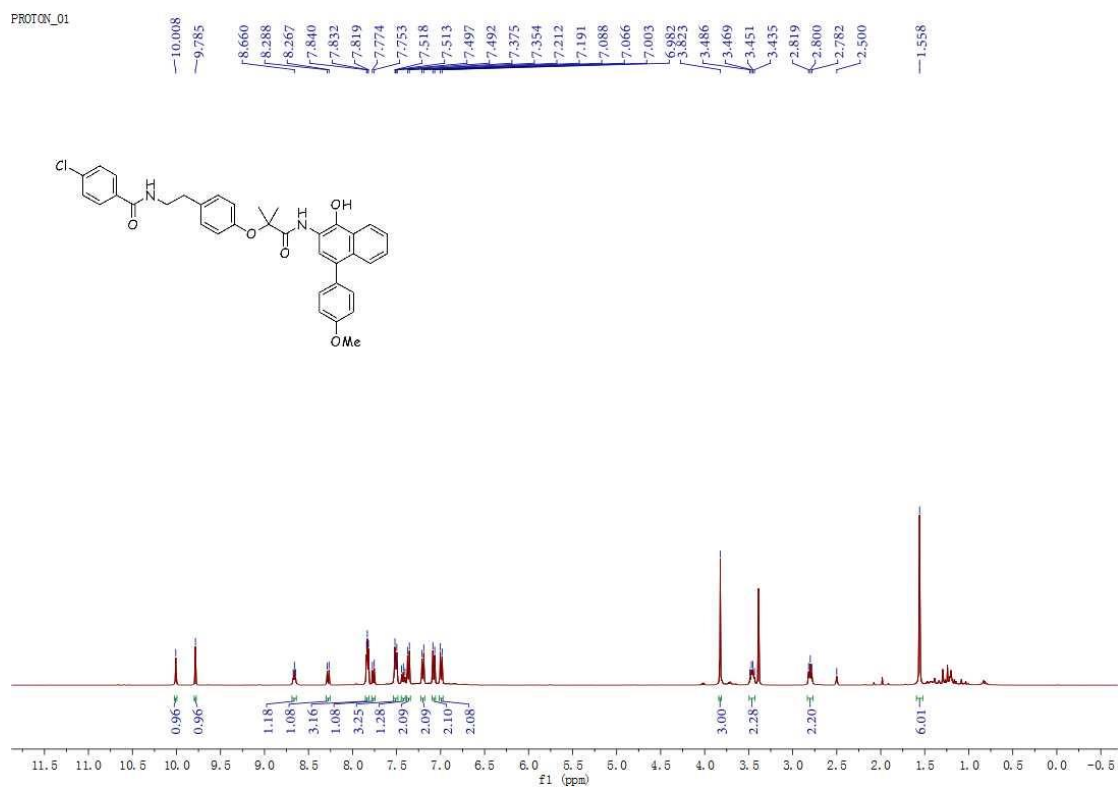

<sup>1</sup>H – NMR spectrum of compound – **5h** (400 MHz, DMSO-*d*<sub>6</sub>)

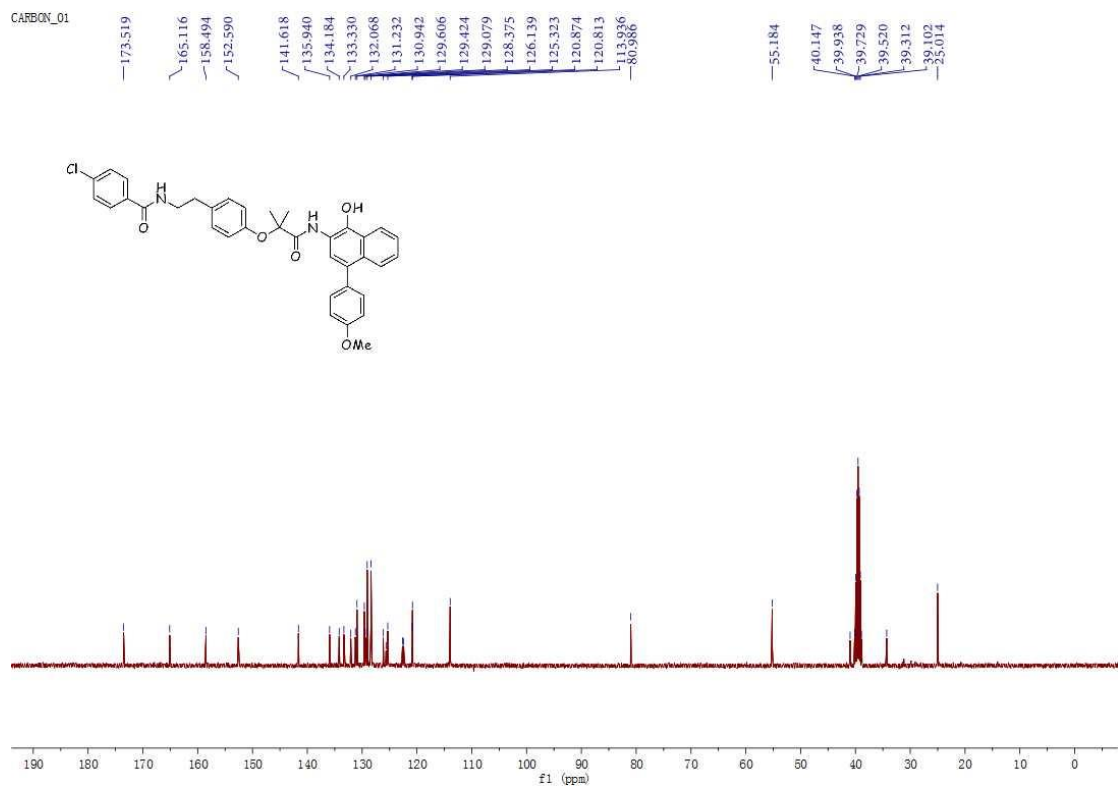

<sup>13</sup>C – NMR spectrum of compound – **5h** (101 MHz, DMSO-*d*<sub>6</sub>)

20220326-YJS-LKZ-272

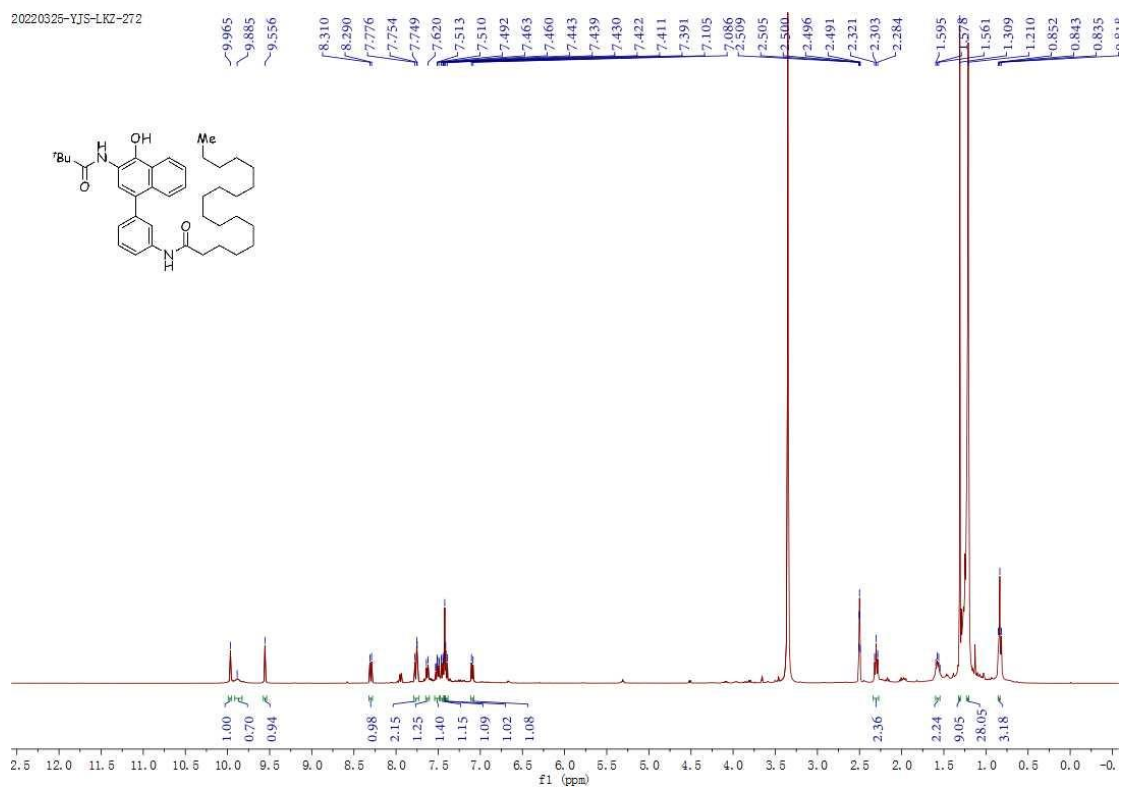

<sup>1</sup>H – NMR spectrum of compound – **5i** (400 MHz, DMSO-*d*<sub>6</sub>)

20220326-YJS-LKZ-272

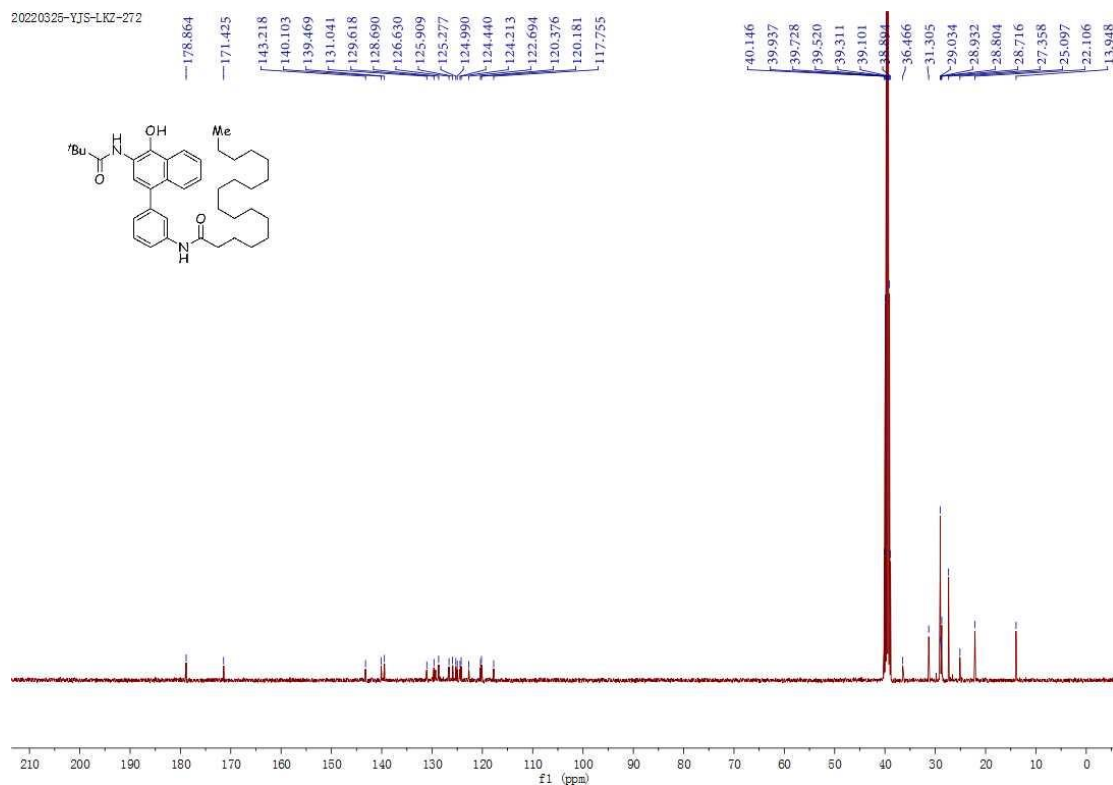

<sup>13</sup>C – NMR spectrum of compound – **5i** (101 MHz, DMSO-*d*<sub>6</sub>)

20221126RJ-5

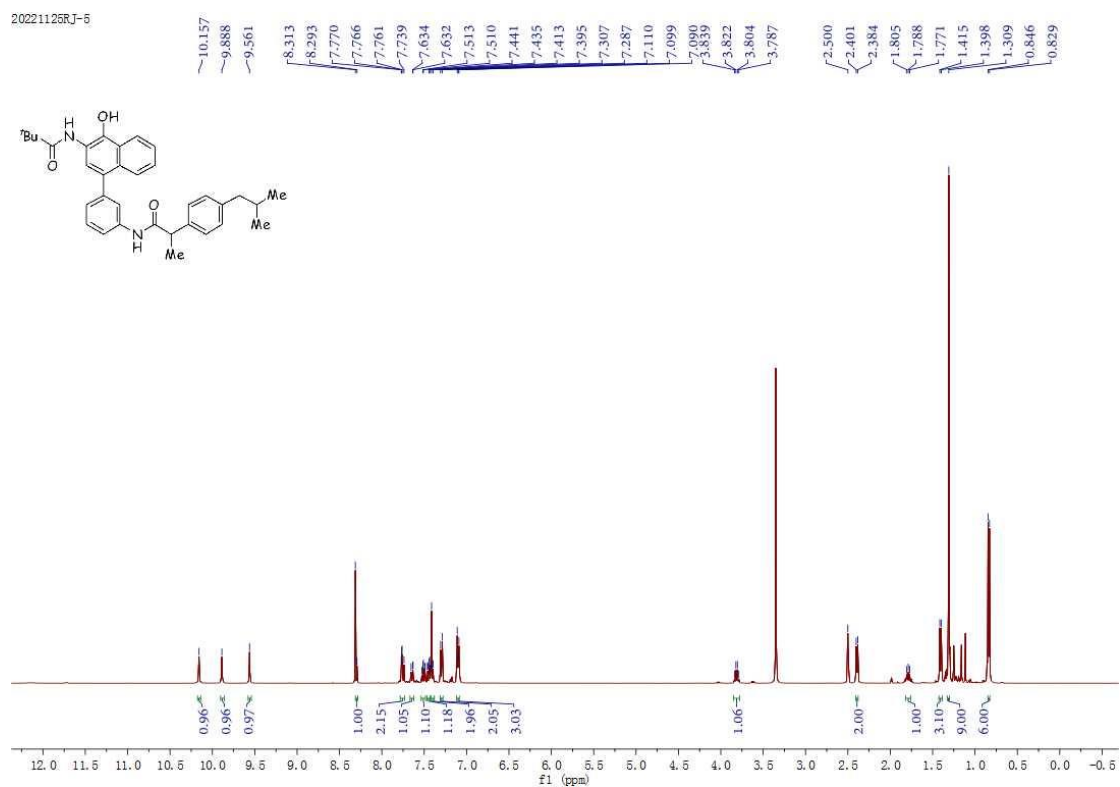

<sup>1</sup>H – NMR spectrum of compound – 5j (400 MHz, DMSO-*d*<sub>6</sub>)

CARBON\_01

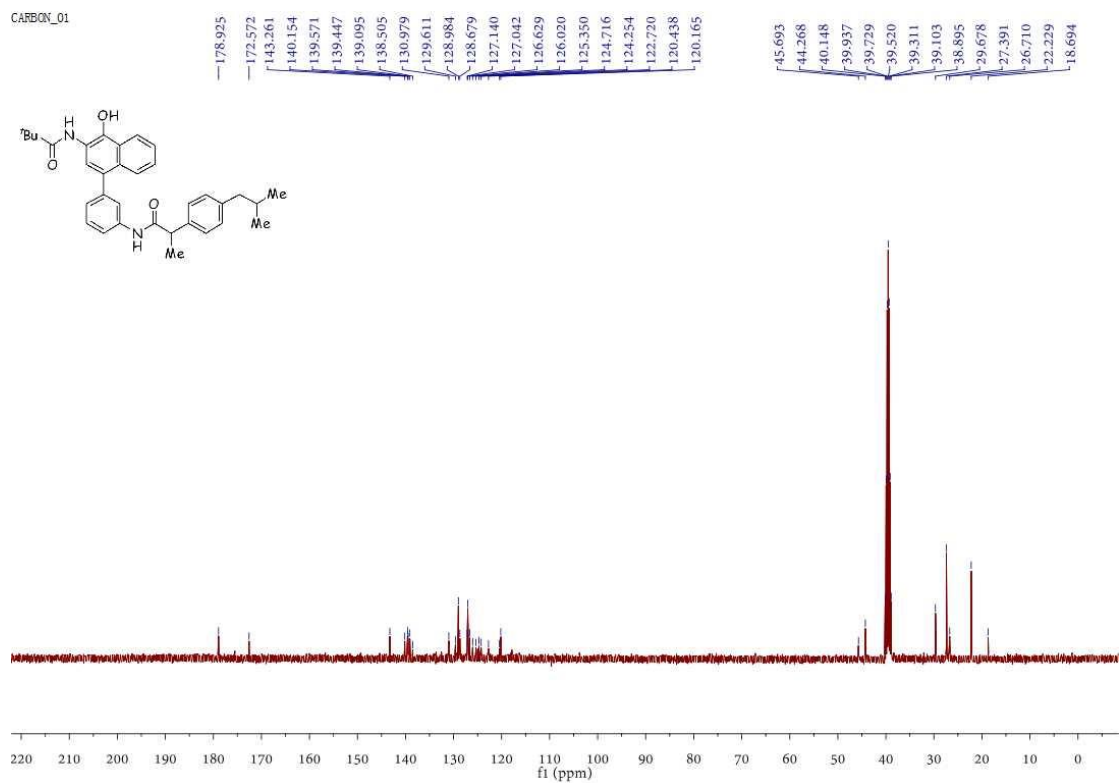

<sup>13</sup>C – NMR spectrum of compound – 5j (101 MHz, DMSO-*d*<sub>6</sub>)



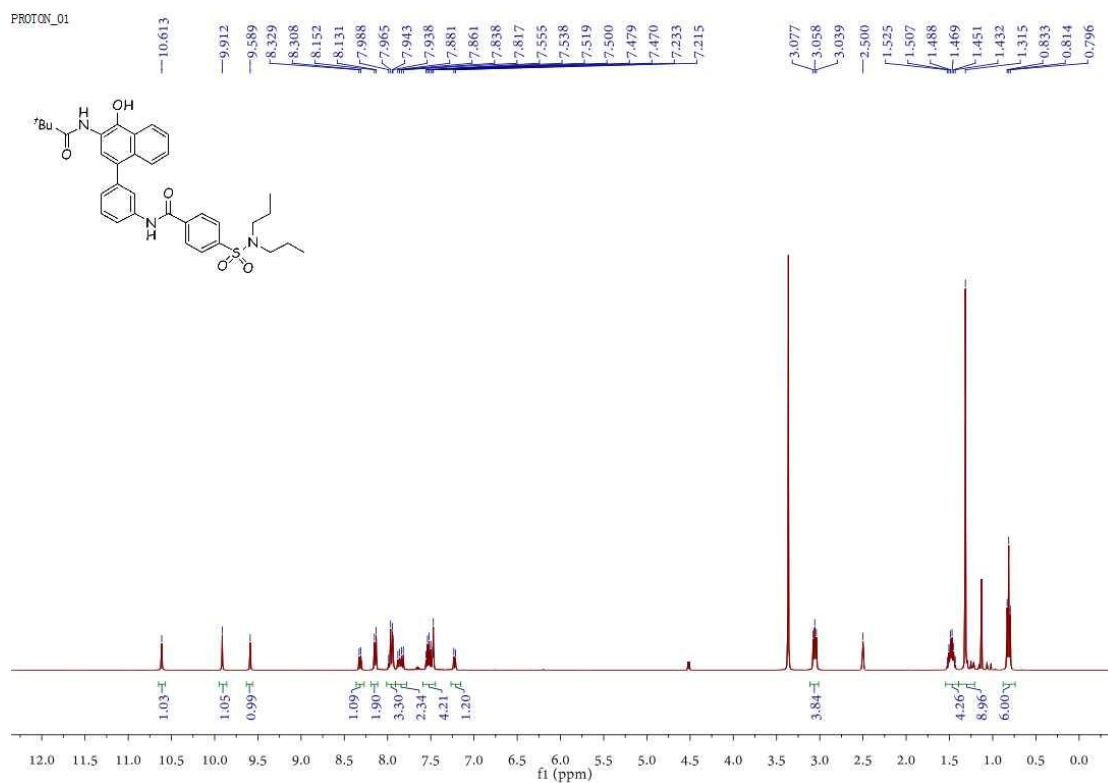

<sup>1</sup>H – NMR spectrum of compound – **5k** (400 MHz, DMSO-*d*<sub>6</sub>)

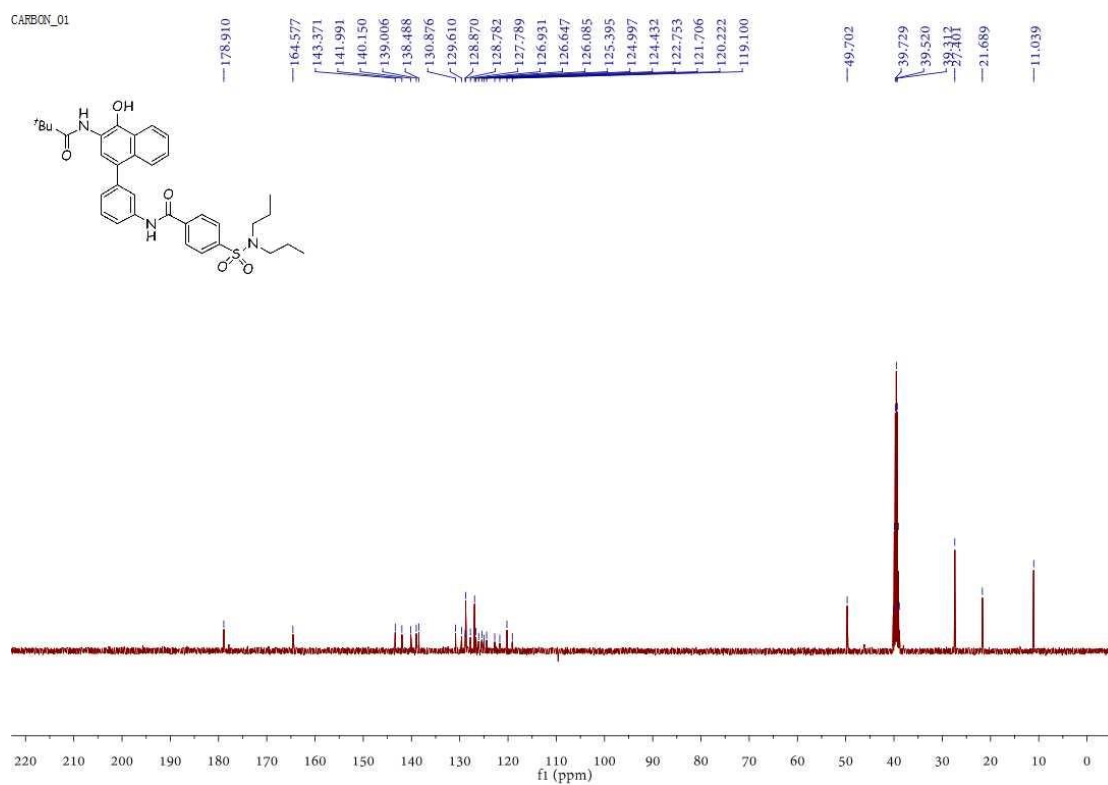

<sup>13</sup>C – NMR spectrum of compound – **5k** (101 MHz, DMSO-*d*<sub>6</sub>)

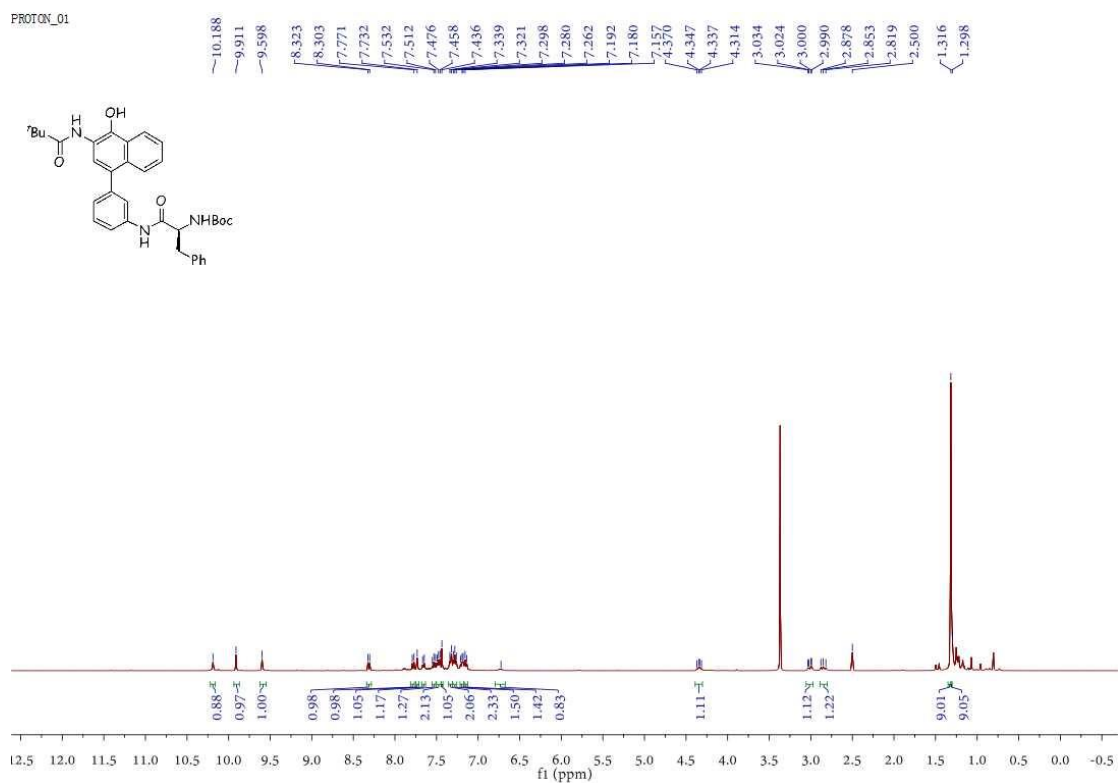

$^1\text{H}$  - NMR spectrum of compound - **51** (400 MHz,  $\text{DMSO-}d_6$ )

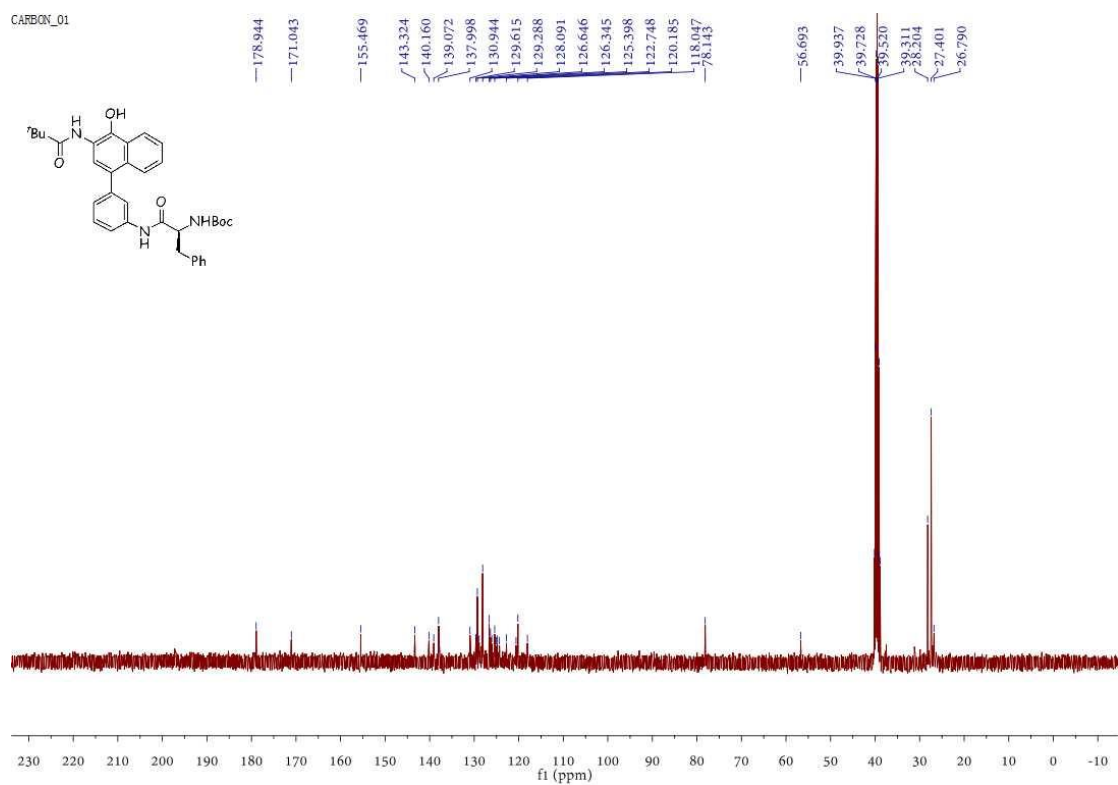

$^{13}\text{C}$  - NMR spectrum of compound - **51** (101 MHz,  $\text{DMSO-}d_6$ )

20220326-YJS-LKZ-278

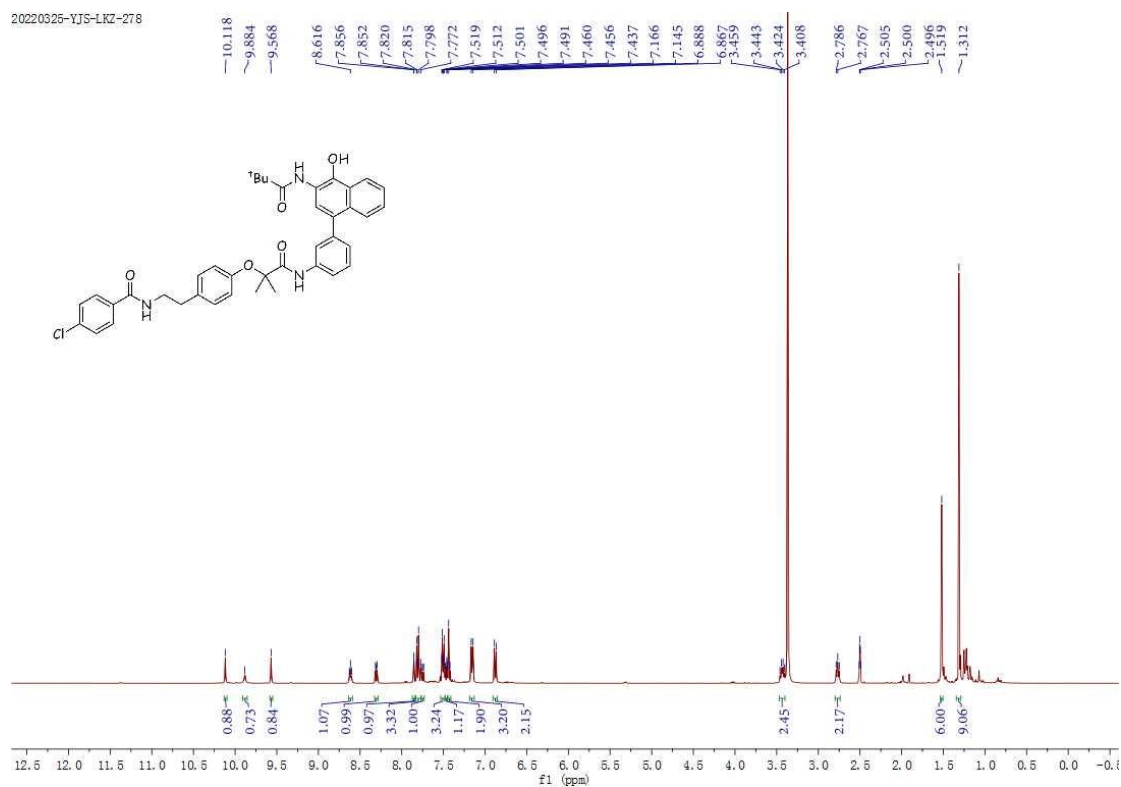

**<sup>1</sup>H – NMR spectrum of compound – 5m (400 MHz, DMSO-*d*<sub>6</sub>)**

CARBON\_01

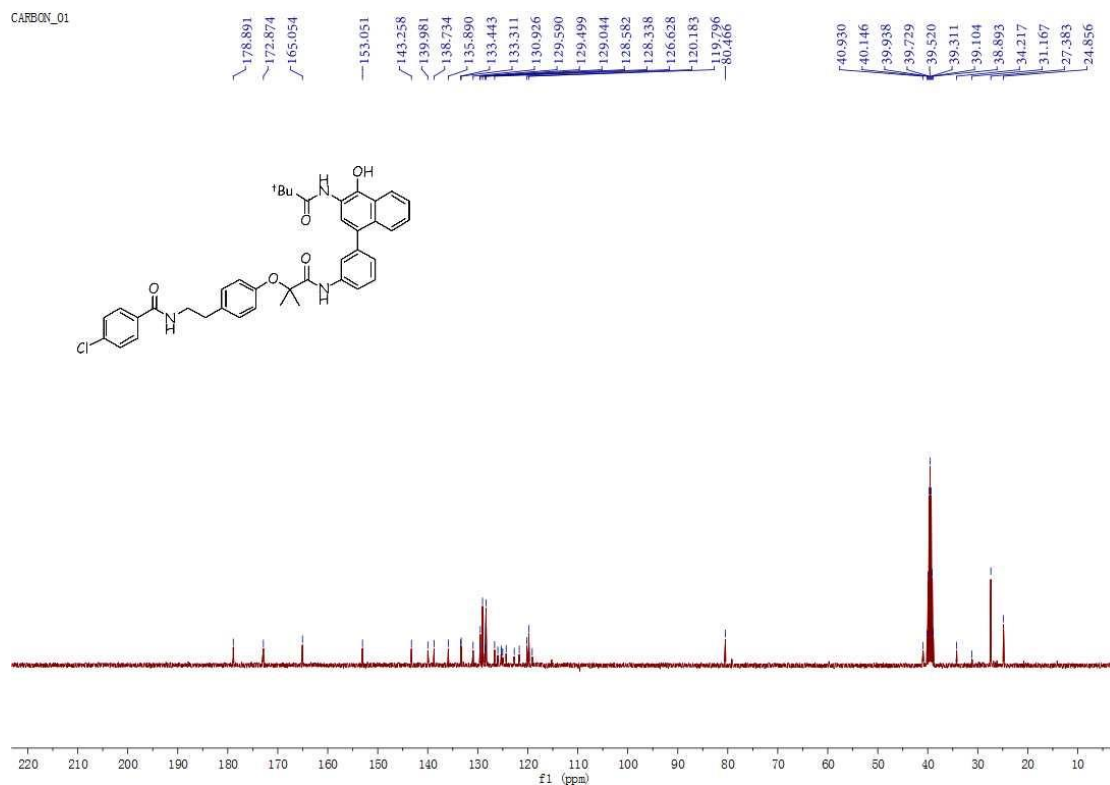

**<sup>13</sup>C – NMR spectrum of compound – 5m (101 MHz, DMSO-*d*<sub>6</sub>)**

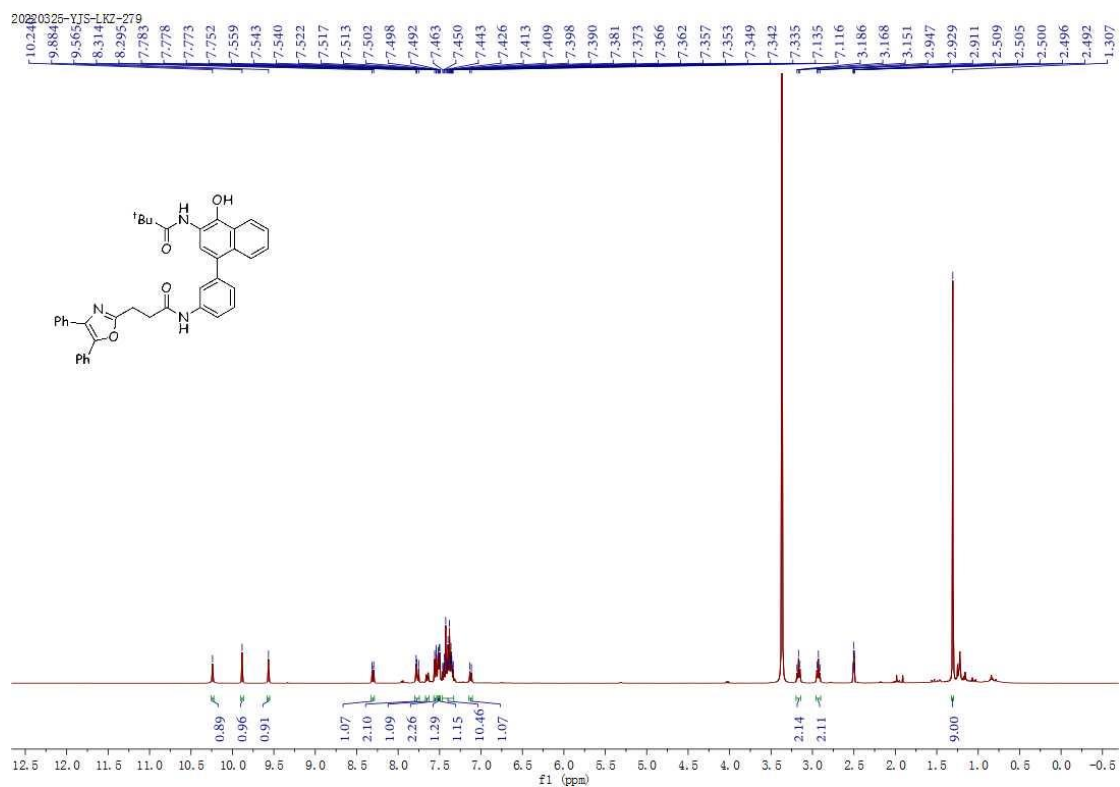

$^1\text{H}$  – NMR spectrum of compound – **5n** (400 MHz,  $\text{DMSO-}d_6$ )

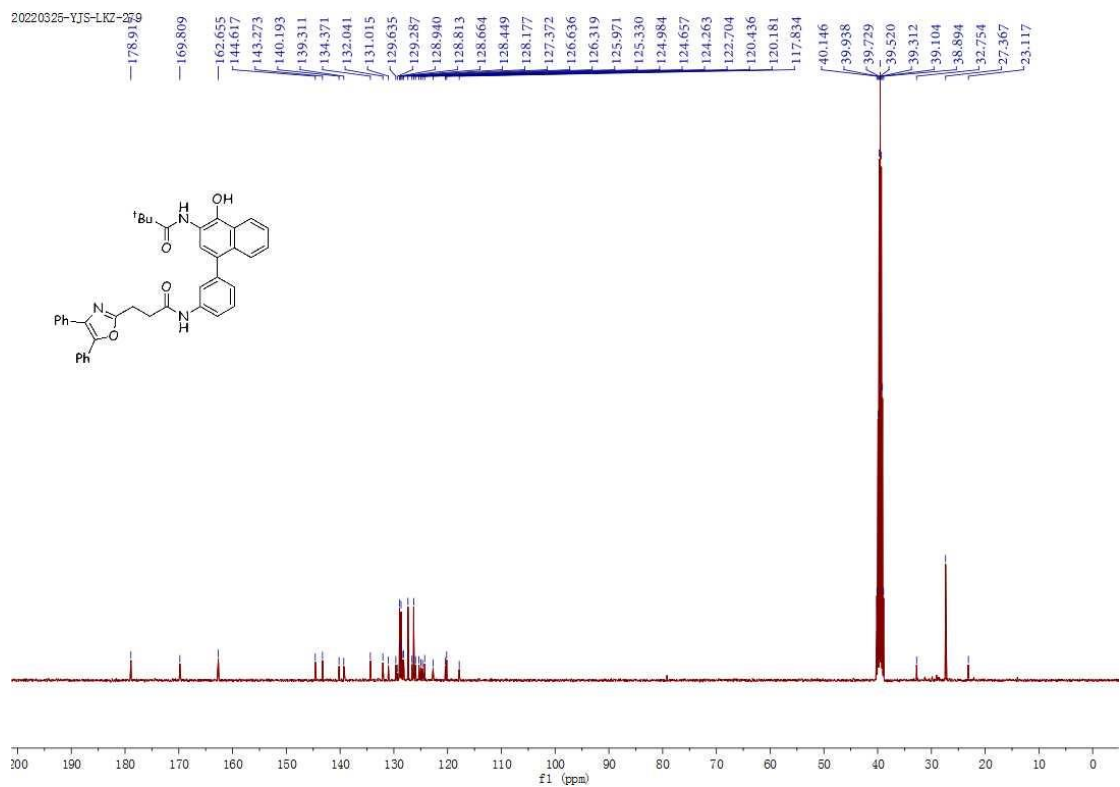

$^{13}\text{C}$  – NMR spectrum of compound – **5n** (101 MHz,  $\text{DMSO-}d_6$ )

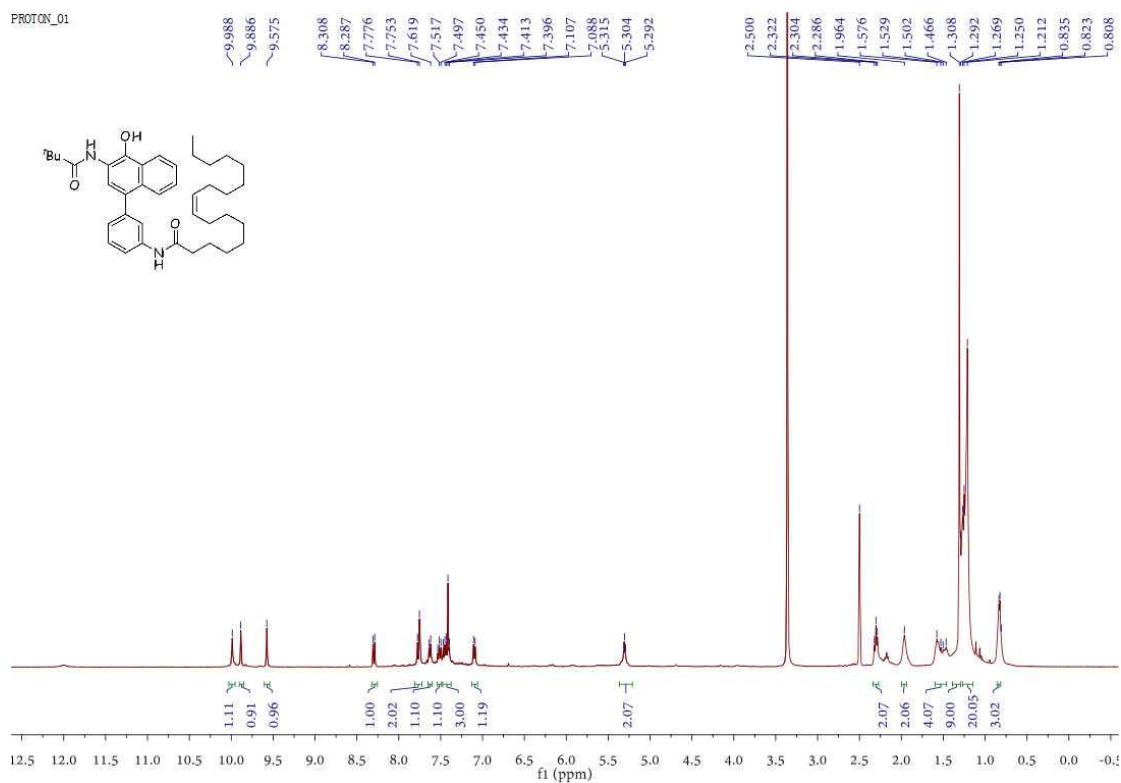

<sup>1</sup>H – NMR spectrum of compound – 50 (400 MHz, DMSO-d<sub>6</sub>)

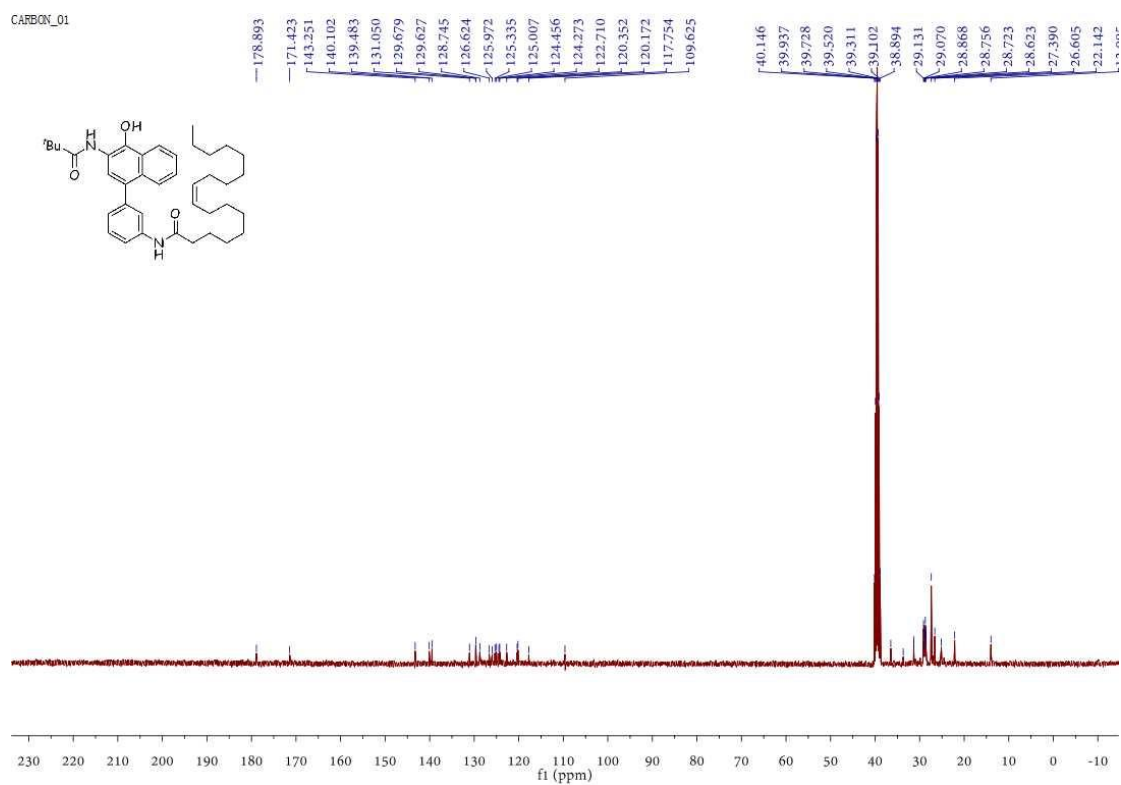

<sup>13</sup>C – NMR spectrum of compound – 50 (101 MHz, DMSO-d<sub>6</sub>)

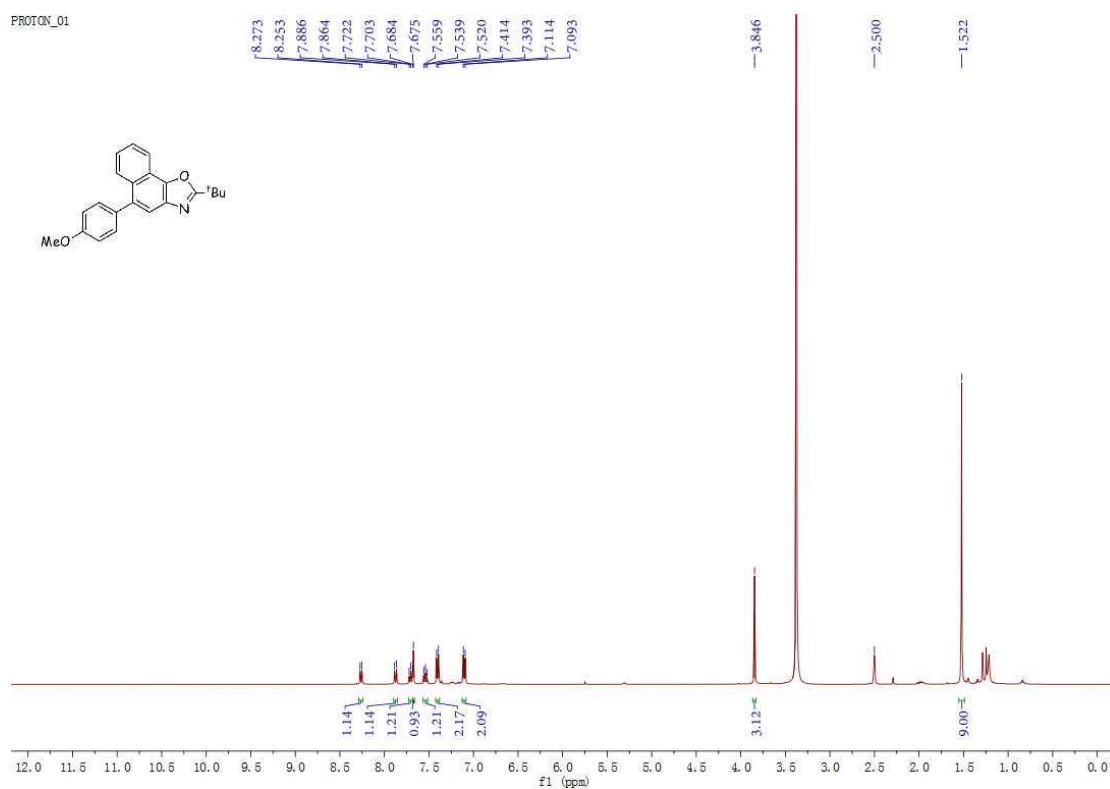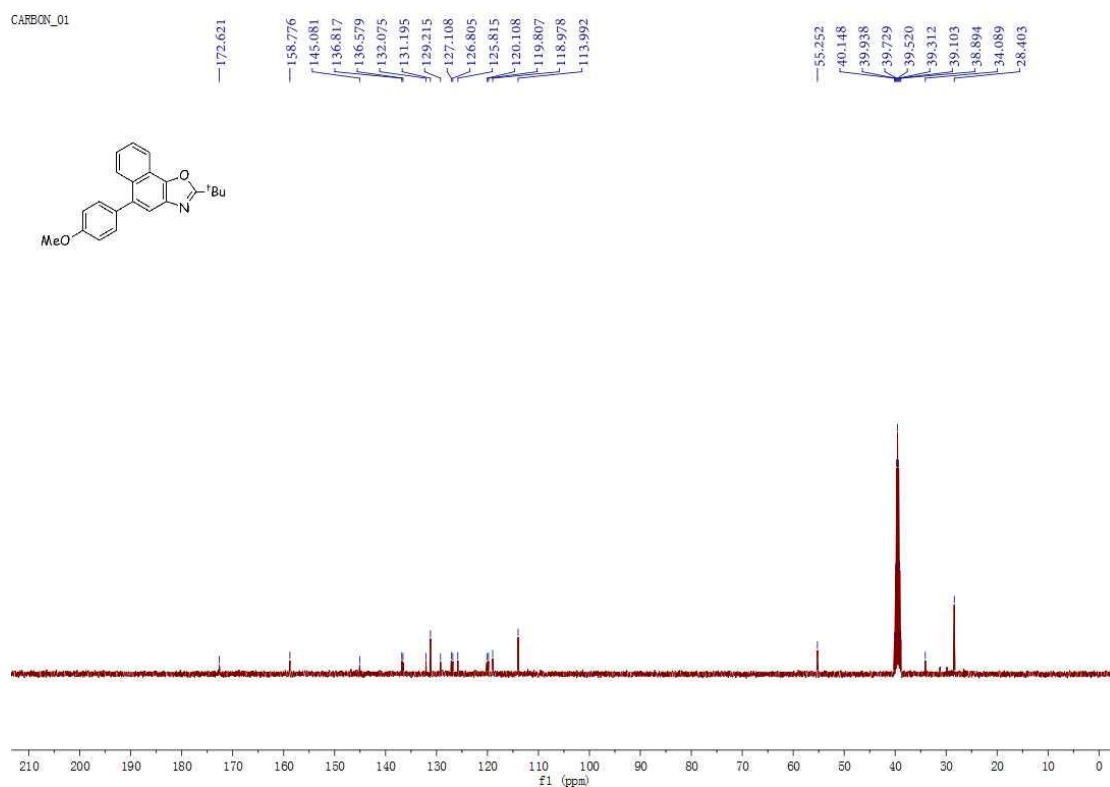

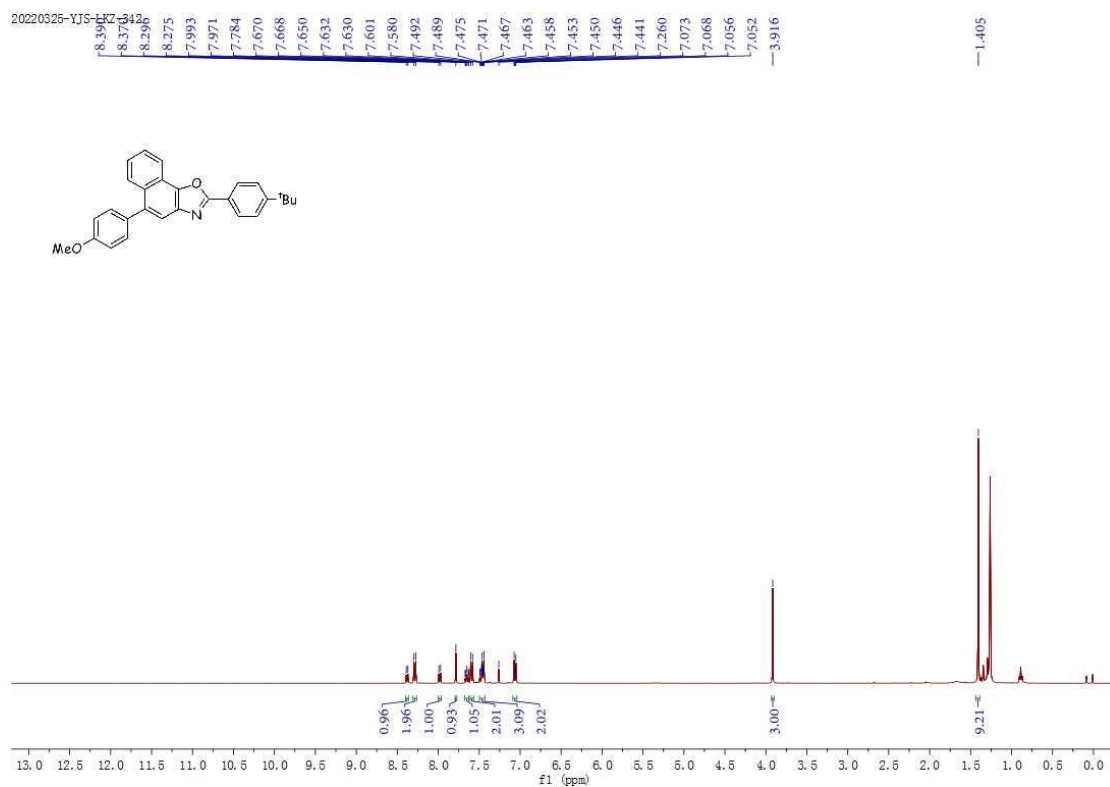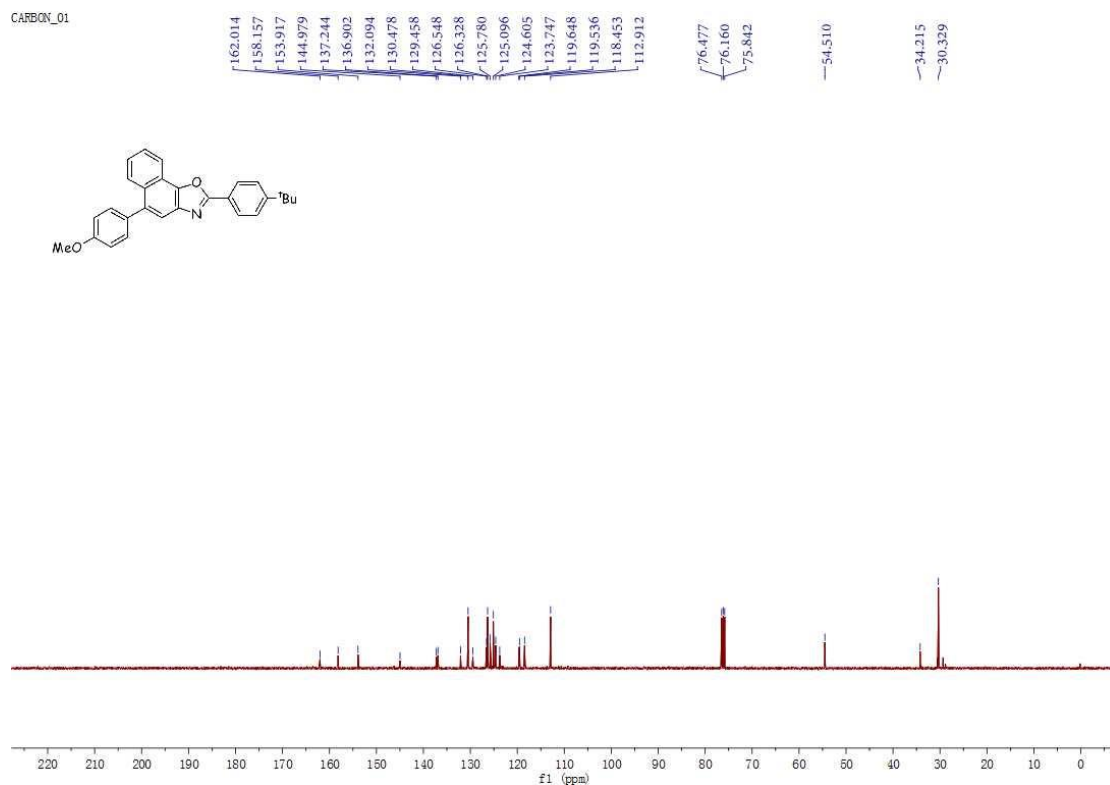

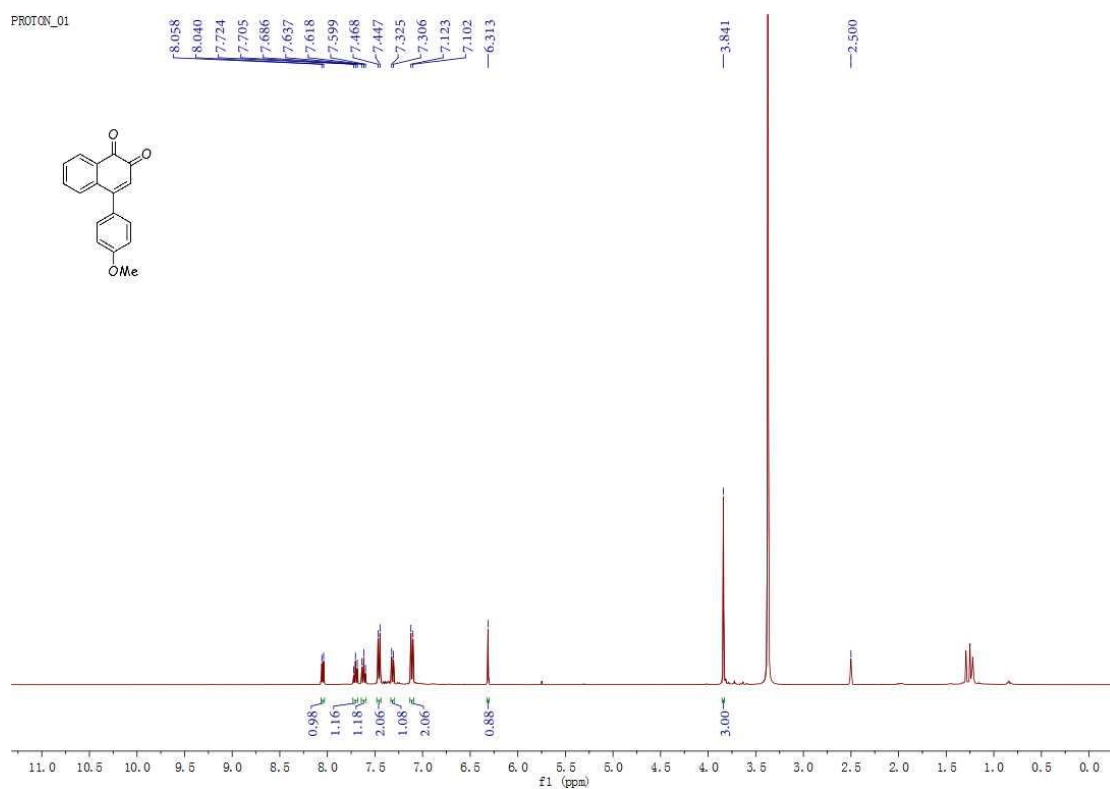

$^1\text{H}$  - NMR spectrum of compound - **6c** (400 MHz,  $\text{DMSO-}d_6$ )

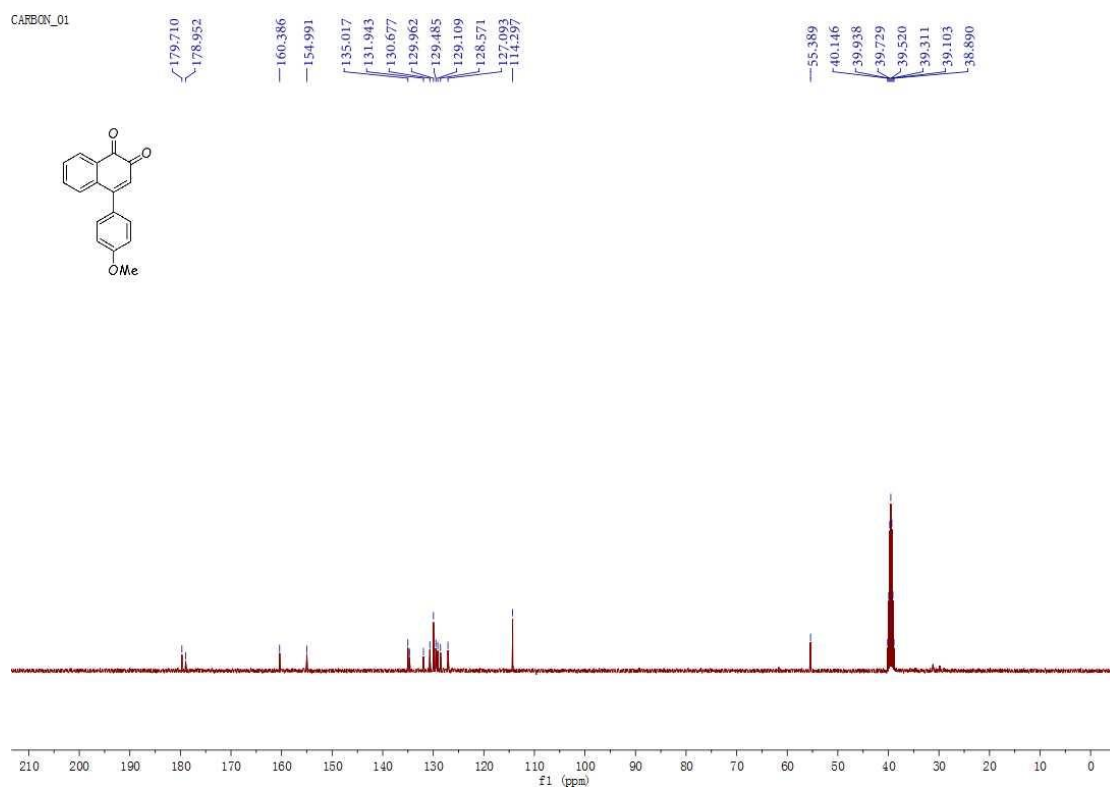

$^{13}\text{C}$  - NMR spectrum of compound - **6c** (101 MHz,  $\text{DMSO-}d_6$ )



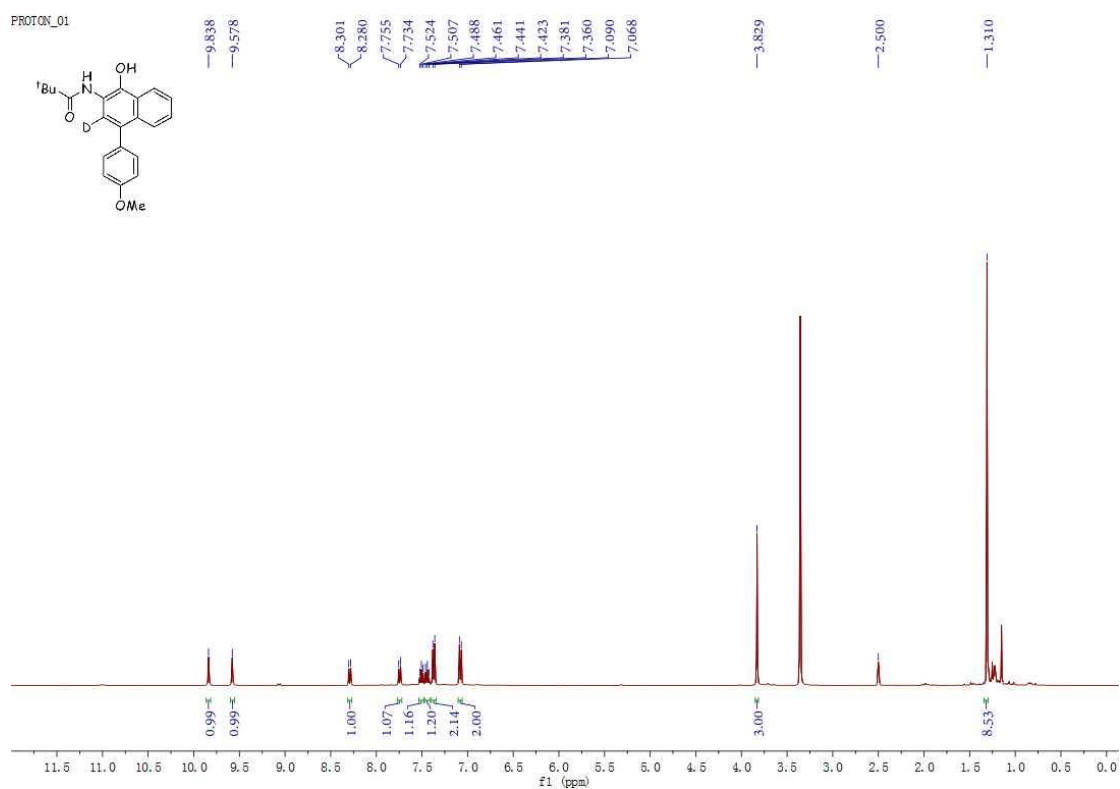

## IX. References

1. Chen, J.; Liu, D.; Butt, N.; Li, C.; Fan, D.; Liu, Y.; Zhang, W. *Angew. Chem., Int. Ed.* **2013**, 125, 11846-11850.
2. Jia, T.; Zeng, G.; Zhang, C.; Zeng, L.; Zheng, W.; Li, S.; Zhu, H. *Chem. Commun.* **2021**, 57, 2657-2660.
3. Balti, M.; Miller, S. A.; Efrat, M. L.; Leadbeater, N. E. *RSC Adv.* **2016**, 6, 72165-72169.
4. Arias, S.; Rodríguez, R.; Quiñoá, E.; Riguera, R.; Freire, F. J. *Am. Chem. Soc.* **2018**, 140, 667-674.
5. Datta, S.; Saha, M. L.; Lahiri, N.; Yu, G.; Louie, J.; Stang, P. J. *Org. Lett.* **2018**, 20, 7020-7023.
